# Supplementary material for: Factors influencing subspecialty choice among medical students: a systematic review and meta-analysis
Source: PubMed Central journal article supplement — BMJ Open. 2019 Mar 7;9(3):e022097. doi: 10.1136/bmjopen-2018-022097 (PMC6429728; doi:10.1136/bmjopen-2018-022097), 2019-03-07

**SI Methods. Search strategy used in the current systematic review and meta-analysis.**

***Medical Students***

1. Students, Medical [Mesh]
2. Medical students
3. Medical student
4. Student, Medical
5. OR / 1 – 4

***Subspecialty Choice***

6. Career choices
7. Choice, Career
8. Choices career
9. Specialties
10. Sub-specialties
11. Sub-discipline
12. OR / 6 – 11

***Study design***

13. Cross sectional study
14. Cross sectional study [Publication Type]
15. Cross sectional study [Mesh Terms]
16. Systematic review
17. Systematic review [Publication Type]
18. Systematic review [Mesh Terms]
19. Meta-analysis [Title/Abstract]
20. Meta-analysis [Mesh Terms]
21. Meta-analysis [Publication Type]
22. OR / 12 – 21

***Factors***

23. Factors

***Combined search***

23. #5 AND #12AND #22 AND #2

**Abbreviations:** MeSH, Medical Subject Heading in PubMed

**Table S1. Quality assessment of the included studies**

| Quality assessment criteria                    | 1 | 2 | 3 | 4 | 5 | 6 | 7 | 8 | 9 | 10 | 11 | Scores |
|------------------------------------------------|---|---|---|---|---|---|---|---|---|----|----|--------|
| 1 Smith et al, <sup>41</sup> 2015              | Y | U | Y | Y | N | Y | N | Y | N | Y  | N  | 6      |
| 2 Cochran et al, <sup>42</sup> 2005            | Y | U | Y | Y | N | Y | N | Y | N | N  | N  | 5      |
| 3 Hauer et al, <sup>43</sup> 2008              | Y | U | Y | Y | N | Y | N | Y | N | Y  | N  | 6      |
| 4 Johnson et al, <sup>44</sup> 2012            | Y | U | Y | Y | N | Y | N | Y | N | Y  | N  | 6      |
| 5 Kiolbassa et al, <sup>45</sup> 2011          | Y | U | Y | Y | N | Y | N | Y | N | N  | N  | 5      |
| 6 Klingensmith et al, <sup>46</sup> 2015       | Y | U | Y | Y | N | Y | N | Y | N | Y  | N  | 6      |
| 7 Lee et al, <sup>47</sup> 2012                | Y | U | Y | Y | Y | Y | N | Y | N | Y  | N  | 7      |
| 8 Macdonald et al, <sup>48</sup> 2012          | Y | U | Y | Y | Y | Y | N | Y | N | Y  | N  | 7      |
| 9 Parsa et al, <sup>37</sup> 2010              | Y | U | Y | Y | Y | Y | N | Y | N | Y  | N  | 7      |
| 10 Paiva et al, <sup>49</sup> 1982             | Y | U | Y | Y | N | Y | N | Y | N | Y  | N  | 6      |
| 11 Ni Chroinin et al, <sup>50</sup> 2013       | Y | U | Y | Y | Y | Y | N | Y | N | Y  | N  | 7      |
| 12 Newton et al, <sup>32</sup> 2005            | Y | U | Y | Y | Y | Y | Y | Y | N | Y  | N  | 8      |
| 13 Rogers et al, <sup>51</sup> 1990            | Y | U | Y | Y | N | Y | N | Y | N | Y  | N  | 6      |
| 14 Abendroth J et al, <sup>52</sup> 2014       | Y | U | Y | Y | N | Y | N | Y | N | Y  | Y  | 7      |
| 15 Alawad et al, <sup>53</sup> 2015            | Y | U | Y | Y | N | Y | Y | Y | Y | Y  | N  | 8      |
| 16 Azizzadeh et al, <sup>54</sup> 2003         | Y | U | Y | Y | Y | Y | N | N | N | Y  | N  | 6      |
| 17 Celenza et al, <sup>55</sup> 2012           | Y | U | Y | Y | Y | Y | Y | N | Y | Y  | N  | 8      |
| 18 Dolan-Evans et al, <sup>56</sup> 2014       | Y | U | Y | Y | Y | Y | N | Y | N | Y  | Y  | 8      |
| 19 Boyd et al, <sup>57</sup> 2009              | Y | U | Y | Y | Y | Y | Y | Y | N | Y  | N  | 8      |
| 20 Egerton et al, <sup>58</sup> 1985           | Y | U | Y | Y | N | Y | N | Y | N | Y  | N  | 6      |
| 21 Diderichsen et al, <sup>59</sup> 2013       | Y | U | Y | Y | N | Y | N | Y | N | Y  | N  | 6      |
| 22 Ferrari et al, <sup>60</sup> 2013           | Y | U | Y | Y | Y | Y | Y | Y | Y | Y  | N  | 9      |
| 23 Freire et al, <sup>61</sup> 2011            | Y | U | Y | Y | Y | Y | N | Y | N | Y  | N  | 7      |
| 24 Buddeberg-Fischer et al, <sup>62</sup> 2006 | Y | U | Y | Y | N | Y | Y | Y | Y | Y  | Y  | 9      |
| 25 Dorsey et al, <sup>63</sup> 2005            | Y | U | Y | Y | N | Y | N | Y | N | Y  | N  | 6      |
| 26 Ekenze et al, <sup>64</sup> 2013            | Y | U | Y | Y | Y | Y | Y | N | N | Y  | N  | 7      |
| 27 Barikani et al, <sup>65</sup> 2012          | Y | U | Y | Y | N | Y | N | Y | N | Y  | N  | 6      |
| 28 Bittaye et al, <sup>66</sup> 2012           | Y | U | Y | Y | N | Y | N | Y | N | Y  | N  | 6      |
| 39 Bonura et al, <sup>67</sup> 2016            | Y | U | Y | Y | Y | Y | Y | Y | Y | Y  | N  | 9      |
| 30 Al-Fouzan et al, <sup>68</sup> 2012         | Y | U | Y | Y | Y | Y | N | Y | N | Y  | N  | 7      |
| 31 AlKot et al, <sup>69</sup> 2015             | Y | U | Y | Y | Y | Y | N | Y | N | Y  | N  | 7      |
| 32 Borges et al, <sup>70</sup> 2009            | Y | U | Y | Y | N | Y | N | N | N | Y  | N  | 5      |
| 33 Budd et al, <sup>71</sup> 2011              | Y | U | Y | Y | Y | Y | N | Y | N | Y  | N  | 7      |
| 34 Corrigan et al, <sup>72</sup> 2007          | Y | U | Y | Y | Y | Y | N | Y | N | Y  | N  | 7      |
| 35 Davis et al, <sup>73</sup> 2016             | Y | U | Y | Y | Y | Y | N | Y | N | Y  | N  | 7      |
| 36 Deutsch et al, <sup>74</sup> 2015           | Y | U | Y | Y | Y | Y | N | Y | Y | Y  | N  | 8      |
| 37 Gardner et al, <sup>75</sup> 2014           | Y | U | Y | Y | N | Y | N | Y | N | Y  | N  | 7      |
| 38 Dias et al, <sup>76</sup> 2013              | Y | U | Y | Y | N | Y | N | N | N | Y  | N  | 5      |
| 39 Goltz et al, <sup>77</sup> 2013             | Y | U | Y | Y | N | Y | N | Y | N | Y  | N  | 6      |
| 40 Gupta et al, <sup>78</sup> 2013             | Y | U | Y | Y | N | Y | N | Y | N | Y  | N  | 6      |
| 41 Hanzlick et al, <sup>79</sup> 2008          | Y | U | Y | Y | N | Y | N | Y | N | Y  | N  | 6      |
| 42 Harris et al, <sup>80</sup> 2005            | Y | U | Y | Y | N | Y | N | Y | N | Y  | N  | 6      |
| 43 Hauer et al, <sup>81</sup> 2008             | Y | U | Y | Y | N | Y | N | Y | N | Y  | N  | 6      |
| 44 Labiris et al, <sup>82</sup> 2014           | Y | U | Y | Y | N | Y | N | Y | N | Y  | N  | 6      |
| 45 Lambert et al, <sup>83</sup> 2008           | Y | U | Y | Y | N | Y | N | Y | N | Y  | N  | 6      |
| 46 Shah et al, <sup>84</sup> 2012              | Y | U | Y | Y | N | Y | N | Y | N | Y  | N  | 6      |
| 47 Lefevre et al, <sup>85</sup> 2010           | Y | U | Y | Y | N | Y | N | Y | N | Y  | N  | 6      |
| 48 Vicente et al, <sup>86</sup> 2013           | Y | U | Y | Y | N | N | Y | N | Y | Y  | N  | 6      |
| 49 Wiesenfeld et al, <sup>87</sup> 2014        | Y | U | Y | Y | Y | Y | N | Y | N | Y  | N  | 7      |
| 50 Lam et al, <sup>88</sup> 2016               | Y | U | Y | Y | Y | Y | Y | Y | Y | Y  | N  | 9      |
| 51 Hartung et al, <sup>89</sup> 2005           | Y | U | Y | Y | N | Y | N | N | N | N  | N  | 4      |
| 52 Girasek et al, <sup>90</sup> 2011           | Y | U | Y | Y | N | Y | N | N | N | Y  | N  | 5      |
| 53 Zuccato et al, <sup>91</sup> 2015           | Y | U | Y | Y | N | Y | N | Y | N | Y  | N  | 6      |
| 54 Wilbanks et al, <sup>92</sup> 2015          | Y | U | Y | Y | N | Y | Y | Y | Y | Y  | Y  | 9      |
| 55 West et al, <sup>93</sup> 2009              | Y | U | Y | Y | N | Y | N | Y | N | Y  | N  | 6      |
| 56 Watmough et al, <sup>94</sup> 2007          | Y | U | Y | Y | N | N | N | N | N | Y  | N  | 4      |
| 57 Thakur et al, <sup>95</sup> 2001            | Y | U | Y | Y | Y | Y | Y | N | Y | Y  | N  | 8      |
| 58 Scott et al, <sup>96</sup> 2011             | Y | U | Y | Y | N | Y | N | Y | N | Y  | N  | 6      |
| 59 Schnuth et al, <sup>97</sup> 2003           | Y | U | Y | Y | N | Y | N | Y | N | Y  | N  | 6      |
| 60 Richards et al, <sup>98</sup> 2009          | Y | U | Y | Y | N | Y | N | N | N | Y  | N  | 5      |
| 61 Reed et al, <sup>99</sup> 2009              | Y | U | Y | Y | Y | Y | Y | Y | Y | Y  | N  | 9      |
| 62 de Souza et al, <sup>100</sup> 2015         | Y | U | Y | Y | Y | Y | N | Y | N | Y  | N  | 7      |
| 63 Pikoulis et al, <sup>101</sup> 2010         | Y | U | Y | Y | N | Y | N | Y | N | Y  | N  | 6      |
| 64 Ozer et al, <sup>102</sup> 2015             | Y | U | Y | Y | N | N | Y | N | Y | Y  | N  | 6      |
| 65 Noble et al, <sup>103</sup> 2004            | Y | U | Y | Y | Y | Y | Y | Y | N | Y  | N  | 8      |
| 66 Noble et al, <sup>104</sup> 2010            | Y | U | Y | Y | N | Y | N | N | N | Y  | N  | 5      |
| 67 Newton et al, <sup>105</sup> 2005           | Y | U | Y | Y | N | Y | Y | N | N | Y  | N  | 6      |
| 68 Moore et al, <sup>106</sup> 2012            | Y | U | Y | Y | Y | Y | N | Y | N | N  | N  | 6      |
| 69 Momen et al, <sup>107</sup> 2015            | Y | U | Y | Y | N | Y | N | Y | N | Y  | N  | 6      |
| 70 Mehmood et al, <sup>108</sup> 2012          | Y | U | Y | Y | N | Y | N | Y | N | Y  | N  | 6      |
| 71 Loriot et al, <sup>109</sup> 2010           | Y | U | Y | Y | Y | Y | N | Y | N | Y  | N  | 7      |
| 72 Lefevre et al, <sup>110</sup> 2010          | Y | U | Y | Y | Y | Y | N | Y | N | Y  | N  | 7      |
| 73 Vo et al, <sup>111</sup> 2017               | Y | U | Y | Y | Y | N | N | N | N | Y  | N  | 5      |
| 74 Grasreiner et al, <sup>112</sup> 2018       | Y | U | Y | Y | Y | Y | N | N | N | Y  | N  | 6      |
| 75 Alkhaman et al, <sup>113</sup> 2018         | Y | U | Y | Y | N | N | Y | N | N | Y  | N  | 5      |

**Quality assessment criteria in detail**

1. Define the source of information (survey, record review).
2. List the inclusion and exclusion criteria for the exposed and unexposed subjects (cases and controls) or refer to previous publications.
3. Indicate the time period used for identifying patients.
4. Indicate whether the subjects were consecutive if not population-based.
5. Indicate whether the evaluators of the subjective components of the study were masked to the other aspects of participants' status.
6. Describe any assessments undertaken for quality assurance purposes (e.g., test/retest of primary outcome measurements)
7. Explain any patient exclusion from the analyses.
8. Describe how confounding was assessed and/or controlled.
9. If applicable, explain how missing data were handled in the analysis.
10. Summarize the patient response rates and the completeness of the data collection.
11. Clarify what follow-up, if any, was expected and the percentage of patients with incomplete data or follow-up.

**“Y”: Yes; “N”: No; “U”: Unclear.**

**Table S2. Meta-analyses of the Factors Influencing Medical Students' Choice of Subspecialty Stratified by Region and Survey Year.**

| Factor                                           |             | No. of studies | Total no. of participants | Extent of influence (%) | 95 CI% of EOI value |       | <i>I-square</i> (%) | <i>P</i> -Value | <i>Q</i> -Value |
|--------------------------------------------------|-------------|----------------|---------------------------|-------------------------|---------------------|-------|---------------------|-----------------|-----------------|
|                                                  |             |                |                           |                         | Lower               | Upper |                     |                 |                 |
| Academic interest                                | developed   | 28             | 80,000                    | 79.66                   | 70.73               | 86.39 | 99.8                | 0.02            | 3.51            |
|                                                  | developing  | 10             | 2,366                     | 60.41                   | 43.44               | 75.19 | 98.0                |                 |                 |
|                                                  | before 2010 | 29             | 44,174                    | 78.88                   | 69.04               | 86.22 | 99.7                |                 |                 |
|                                                  | after 2010  | 9              | 38,192                    | 71.54                   | 57.66               | 82.27 | 99.6                |                 |                 |
| Competencies                                     | before 2010 | 9              | 43,134                    | 44.40                   | 29.11               | 60.83 | 99.8                | 0.21            | 1.86            |
|                                                  | after 2010  | 8              | 33,381                    | 66.60                   | 34.48               | 88.31 | 99.8                |                 |                 |
| Controllable lifestyle or flexible work schedule | developed   | 37             | 100,980                   | 52.11                   | 46.52               | 57.65 | 99.6                | 0.63            | 0.68            |
|                                                  | developing  | 7              | 2,017                     | 57.50                   | 45.81               | 68.41 | 95.9                |                 |                 |
|                                                  | before 2010 | 22             | 62,945                    | 53.72                   | 47.48               | 59.84 | 99.4                |                 |                 |
| Patient service orientation                      | after 2010  | 22             | 40,056                    | 52.29                   | 43.51               | 60.93 | 99.2                | 0.97            | 0.05            |
|                                                  | developed   | 27             | 44,235                    | 50.56                   | 44.68               | 56.42 | 98.8                |                 |                 |
|                                                  | developing  | 10             | 2,337                     | 49.02                   | 31.62               | 66.67 | 98.1                |                 |                 |
| Medical teachers or mentors                      | before 2010 | 18             | 40,997                    | 49.56                   | 43.29               | 55.84 | 98.8                | 0.70            | 0.54            |
|                                                  | after 2010  | 19             | 5,579                     | 43.87                   | 38.62               | 63.80 | 98.3                |                 |                 |
|                                                  | developed   | 28             | 84,076                    | 46.43                   | 36.63               | 56.52 | 99.8                |                 |                 |
| Career opportunities                             | developing  | 4              | 995                       | 51.14                   | 33.97               | 68.04 | 95.4                | 0.73            | 0.48            |
|                                                  | before 2010 | 21             | 49,654                    | 48.48                   | 36.93               | 60.19 | 99.8                |                 |                 |
|                                                  | after 2010  | 11             | 35,417                    | 43.87                   | 27.94               | 61.18 | 99.7                |                 |                 |
| Workload or working hours                        | developed   | 31             | 79,867                    | 38.41                   | 29.61               | 48.04 | 99.8                | 0.60            | 0.74            |
|                                                  | developing  | 7              | 2,056                     | 47.32                   | 30.38               | 64.91 | 98.1                |                 |                 |
|                                                  | before 2010 | 20             | 43,417                    | 47.97                   | 33.54               | 62.74 | 99.8                |                 |                 |
| Income                                           | after 2010  | 18             | 38,506                    | 32.38                   | 21.68               | 45.31 | 99.5                | 0.24            | 1.68            |
|                                                  | developed   | 15             | 20,970                    | 42.14                   | 31.35               | 53.72 | 98.6                |                 |                 |
|                                                  | developing  | 5              | 1,081                     | 25.72                   | 13.29               | 43.88 | 95.3                |                 |                 |
| Length of training                               | before 2010 | 9              | 19,456                    | 43.93                   | 29.43               | 59.54 | 98.8                | 0.41            | 1.21            |
|                                                  | after 2010  | 11             | 2,595                     | 32.70                   | 29.43               | 59.54 | 97.4                |                 |                 |
|                                                  | developed   | 39             | 107,091                   | 34.01                   | 26.89               | 41.93 | 99.8                |                 |                 |
| Prestige                                         | developing  | 11             | 2,700                     | 37.11                   | 27.06               | 48.41 | 96.4                | 0.84            | 0.29            |
|                                                  | before 2010 | 25             | 68,714                    | 37.01                   | 25.95               | 49.62 | 99.8                |                 |                 |
|                                                  | after 2010  | 25             | 41,077                    | 32.67                   | 26.04               | 40.07 | 98.9                |                 |                 |
| Advice from others                               | developed   | 15             | 41,246                    | 33.95                   | 28.72               | 39.60 | 98.4                | 0.31            | 1.48            |
|                                                  | developing  | 3              | 800                       | 22.92                   | 10.94               | 41.85 | 94.0                |                 |                 |
|                                                  | before 2010 | 7              | 8,811                     | 26.72                   | 15.89               | 41.29 | 98.9                |                 |                 |
| Student debt                                     | after 2010  | 11             | 33,234                    | 35.87                   | 29.67               | 42.59 | 96.9                | 0.28            | 1.59            |
|                                                  | developed   | 17             | 27,987                    | 23.96                   | 19.20               | 29.47 | 97.3                |                 |                 |
|                                                  | developing  | 9              | 2,642                     | 47.65                   | 34.41               | 61.24 | 97.6                |                 |                 |
| Student debt                                     | before 2010 | 12             | 25,542                    | 26.46                   | 20.78               | 33.03 | 96.7                | 0.01            | 4.71            |
|                                                  | after 2010  | 14             | 5,087                     | 35.22                   | 24.70               | 47.40 | 98.3                |                 |                 |
|                                                  | developed   | 14             | 81,205                    | 25.95                   | 19.27               | 32.64 | 99.8                |                 |                 |
| Student debt                                     | developing  | 4              | 1,487                     | 36.34                   | 18.91               | 53.77 | 98.1                | 0.36            | 1.33            |
|                                                  | before 2010 | 10             | 48,319                    | 22.93                   | 17.85               | 28.01 | 99.5                |                 |                 |
|                                                  | after 2010  | 8              | 34,373                    | 33.65                   | 25.12               | 42.18 | 99.1                |                 |                 |
| Student debt                                     | before 2010 | 5              | 6,610                     | 20.29                   | 15.86               | 25.57 | 81.8                | 0.69            | 0.59            |
|                                                  | after 2010  | 3              | 32,307                    | 11.08                   | 1.58                | 49.08 | 99.6                |                 |                 |

**Figure S1. Flow Diagram of the Study Inclusion.**

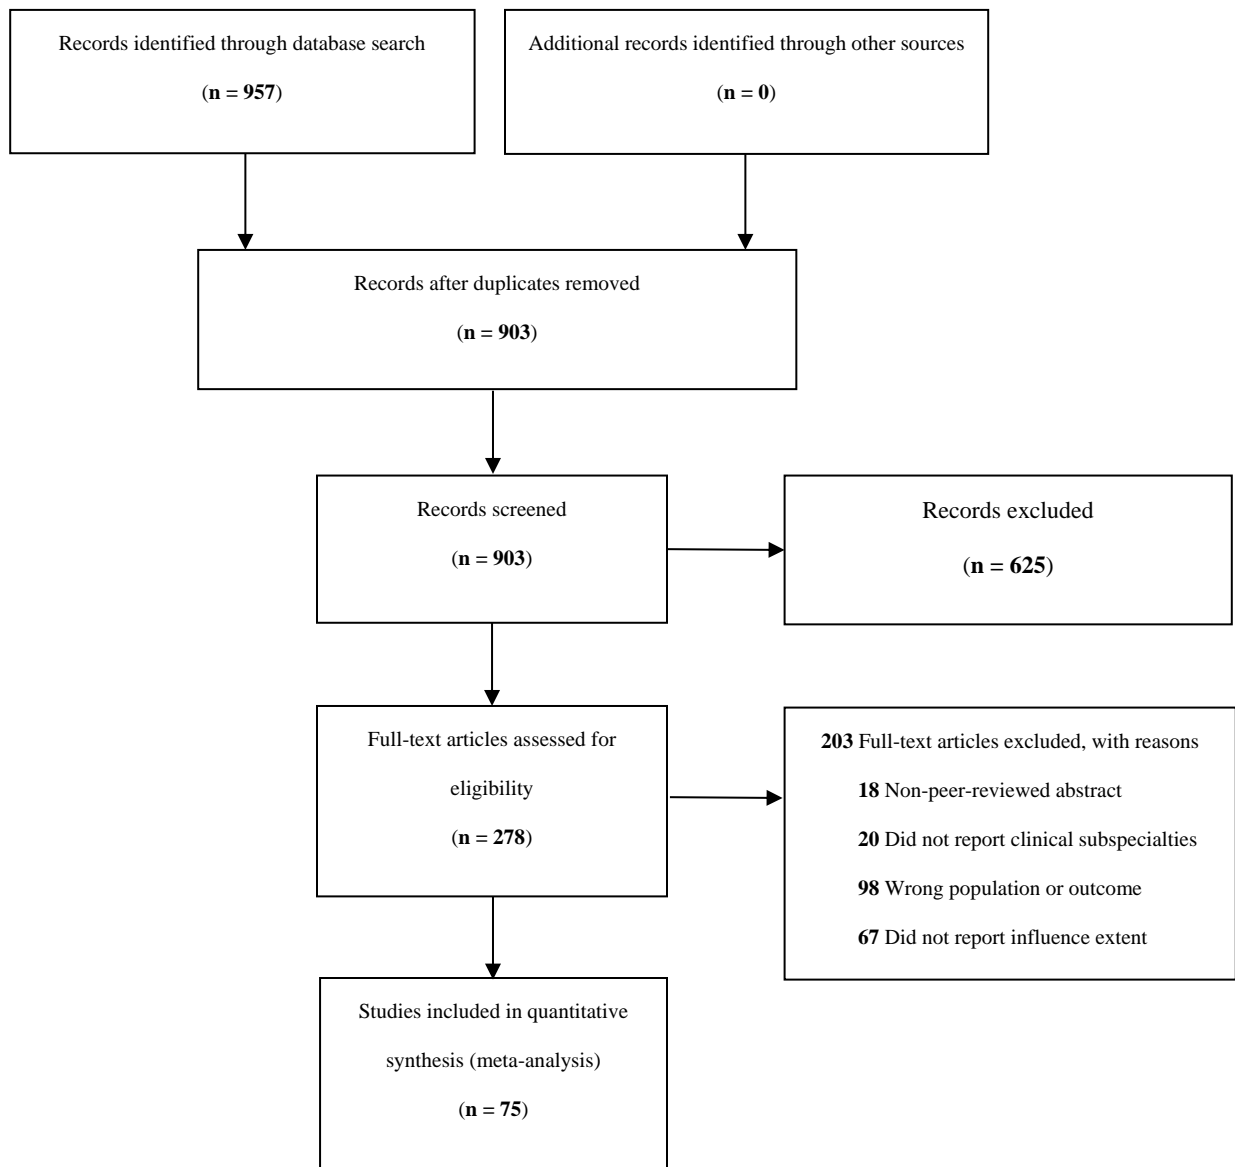

Figure S2. Forest Plot of “Academic Interest”.

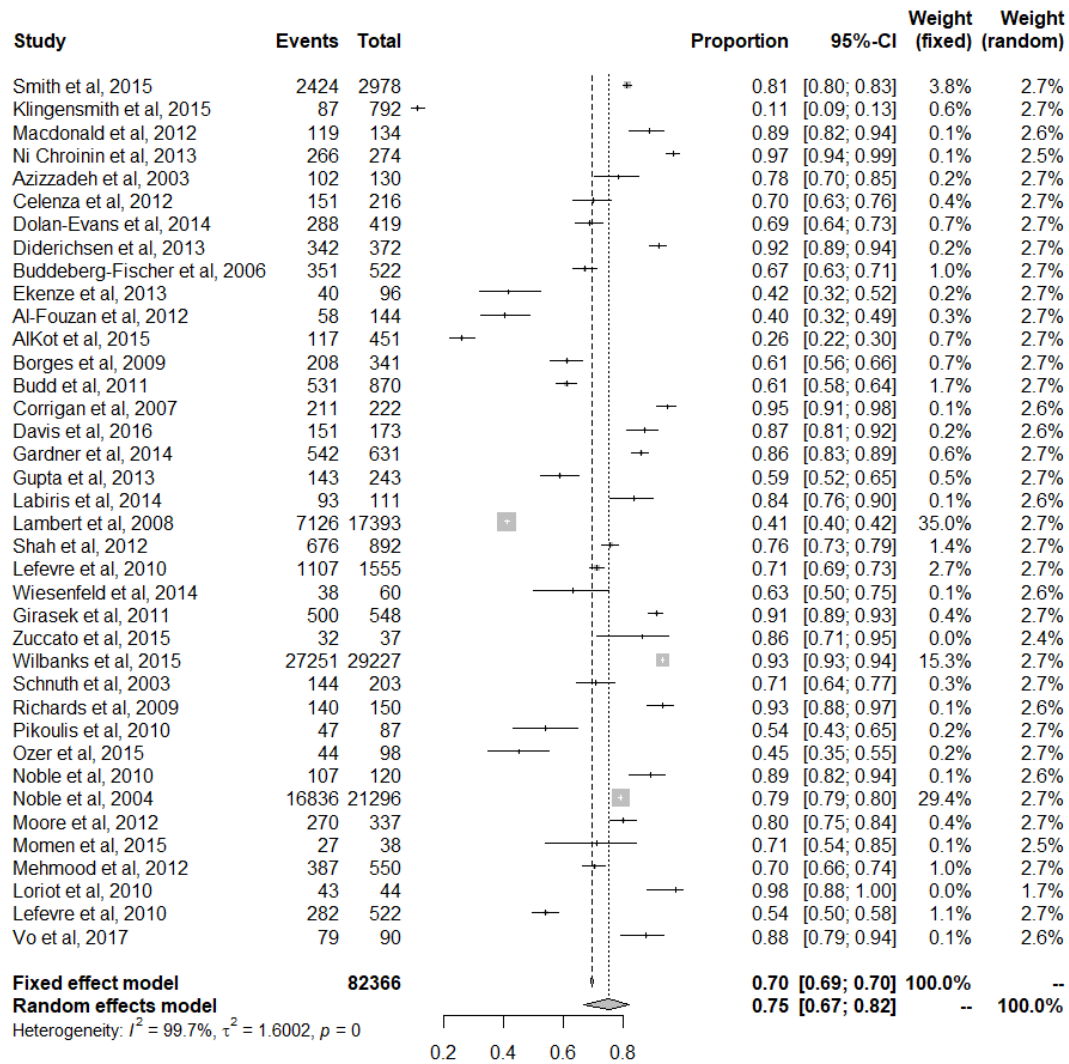

**Figure S3. Forest Plot of “Competencies”.**

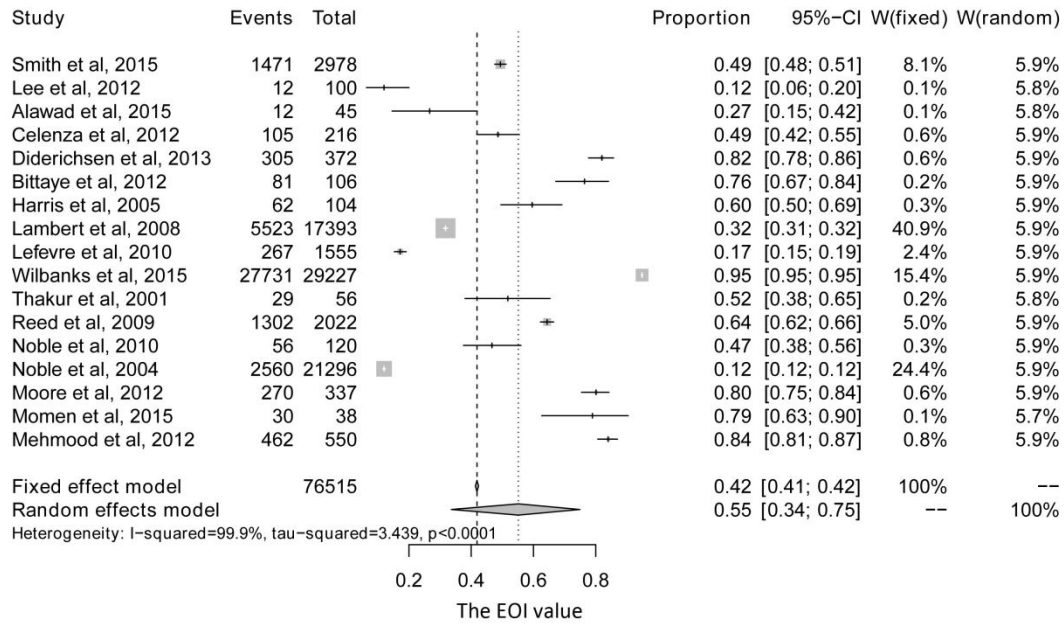

**Figure S4. Forest Plot of “Controllable Lifestyle or Flexible Work Schedule”.**

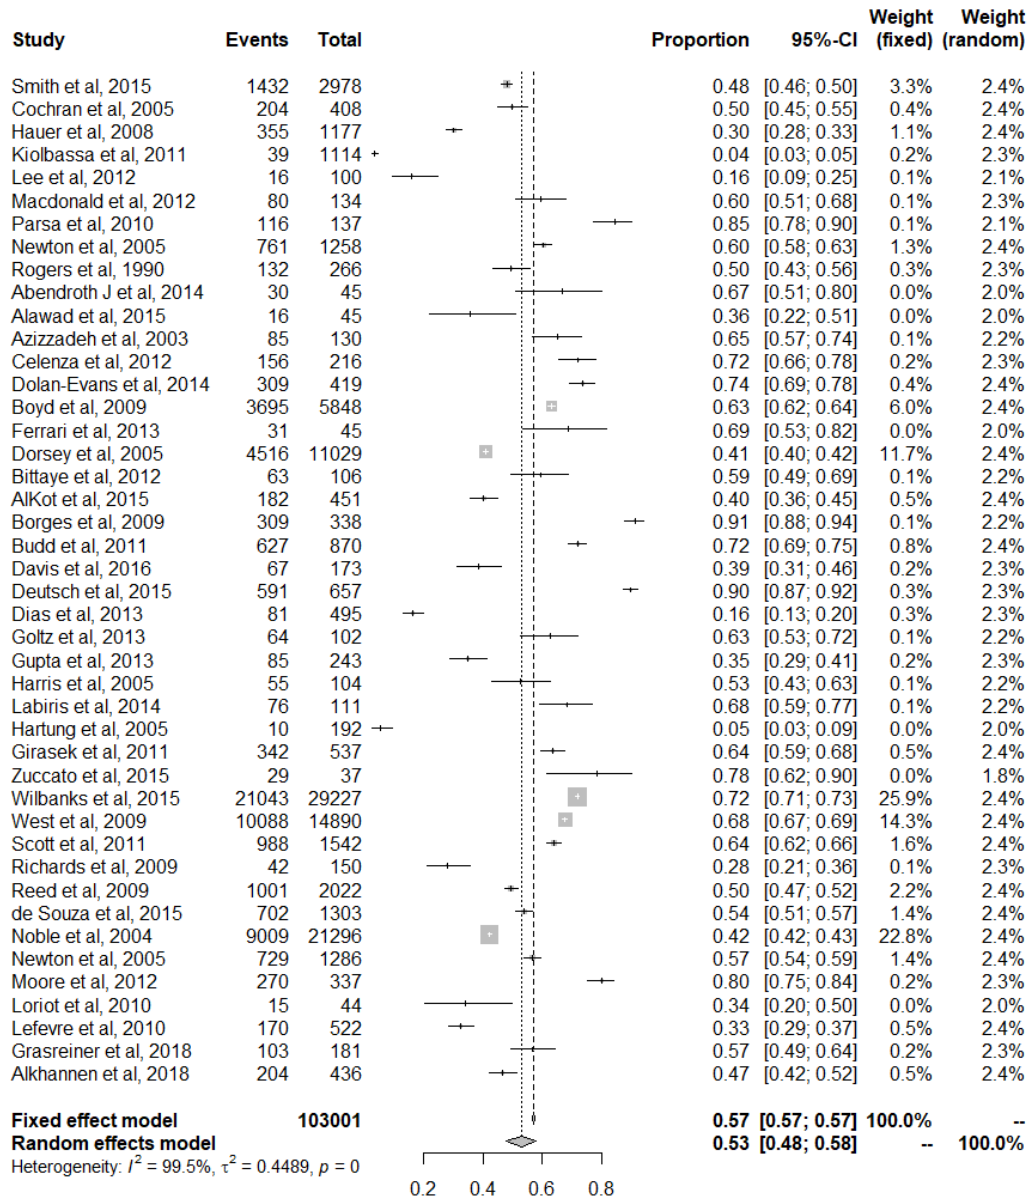

**Figure S5. Forest Plot of “Patient Service Orientation”.**

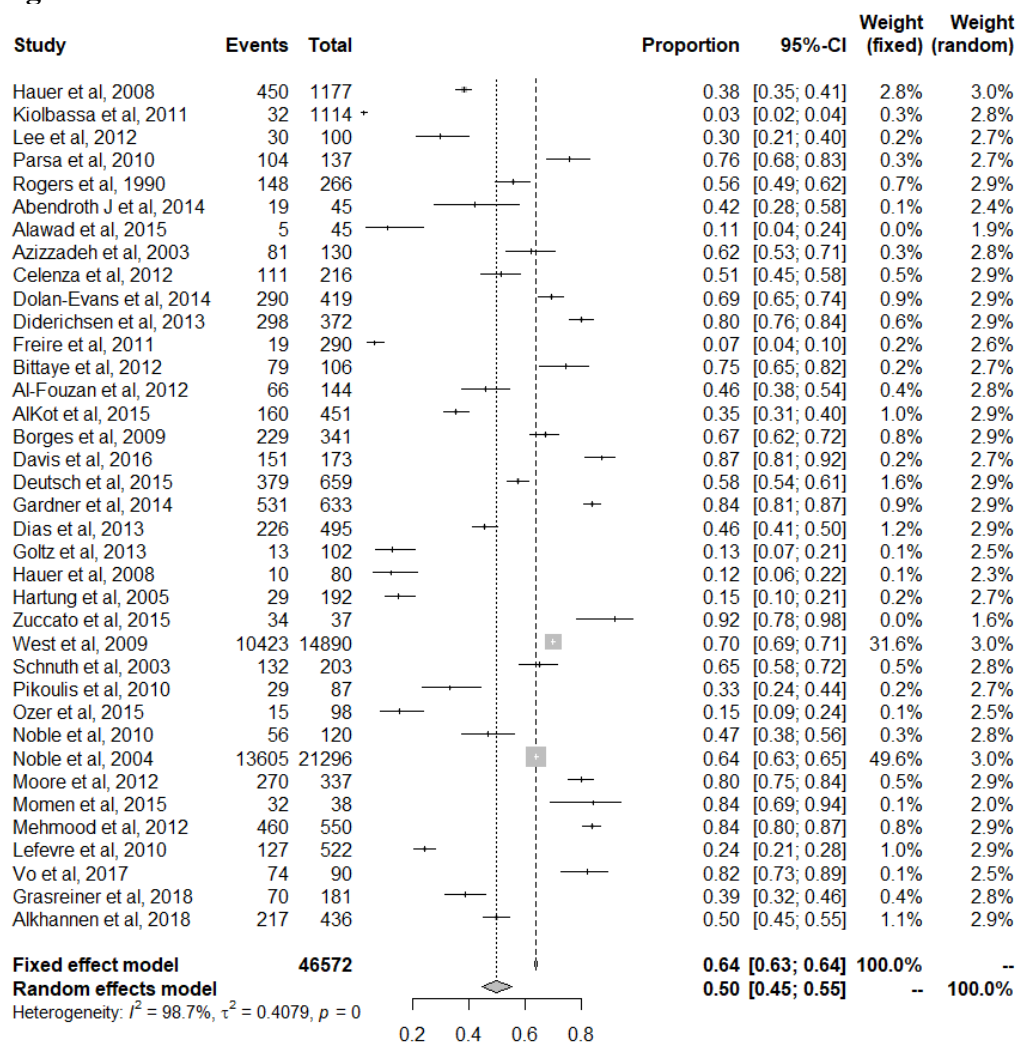



Figure S6. Forest Plot of “Medical Teachers or Mentors”.

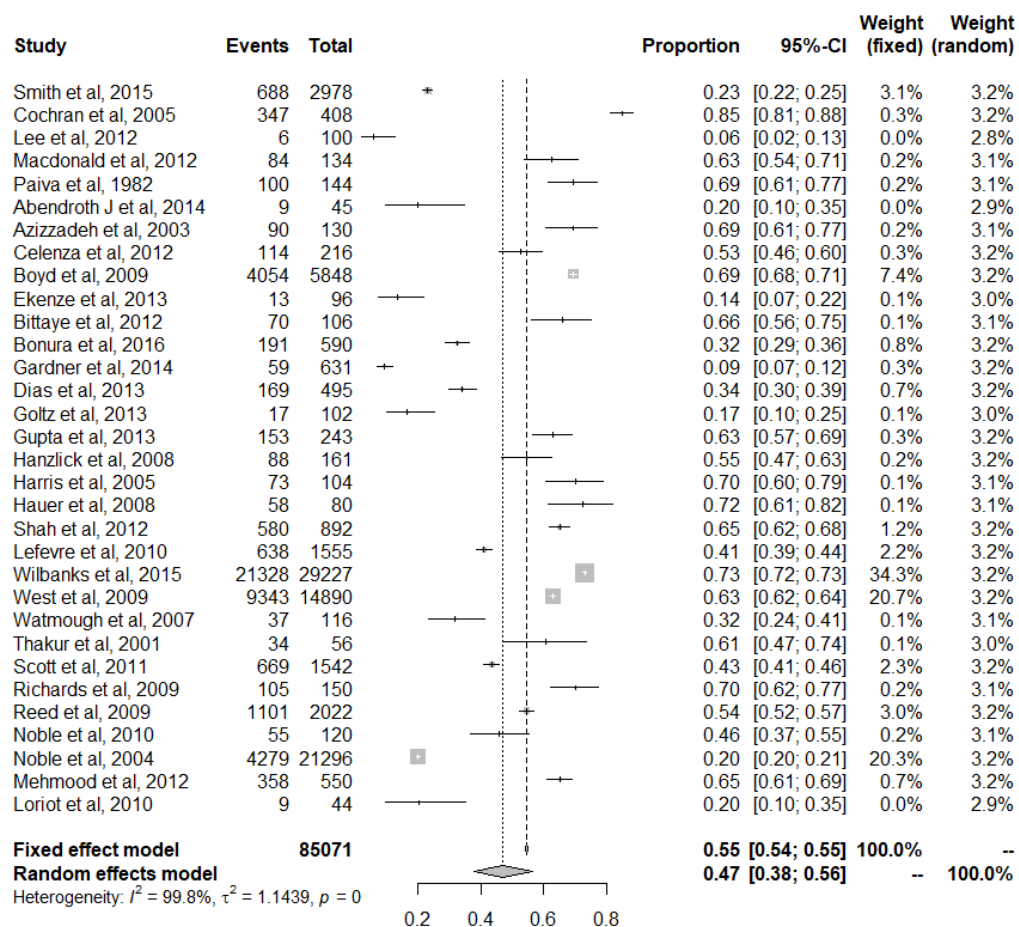

**Figure S7. Forest Plot of “Career Opportunities”.**

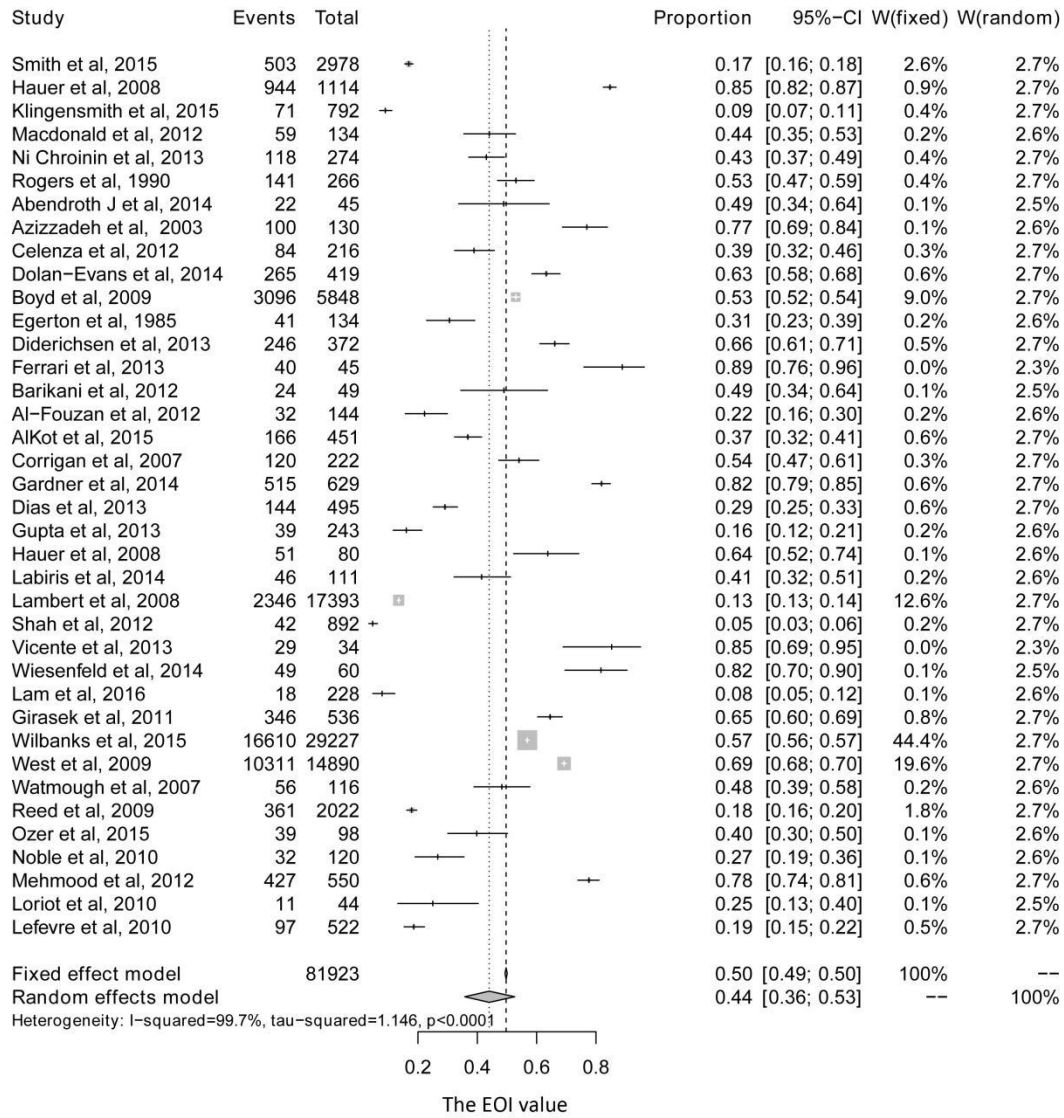

**Figure S8. Forest Plot of “Workload or Working Hours”.**

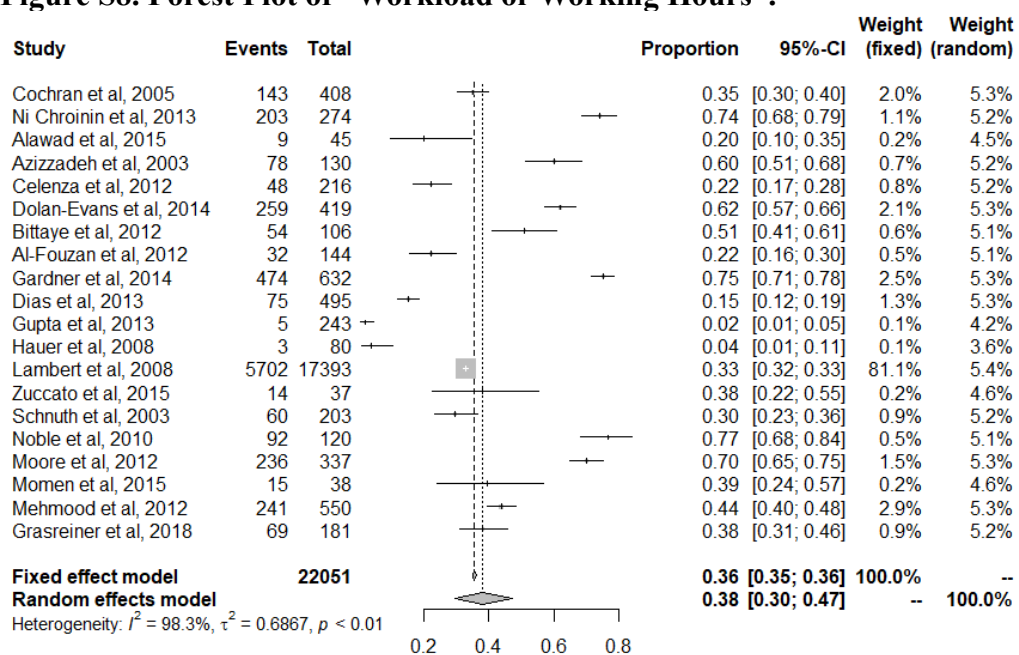

Figure S9. Forest Plot of “Income”.

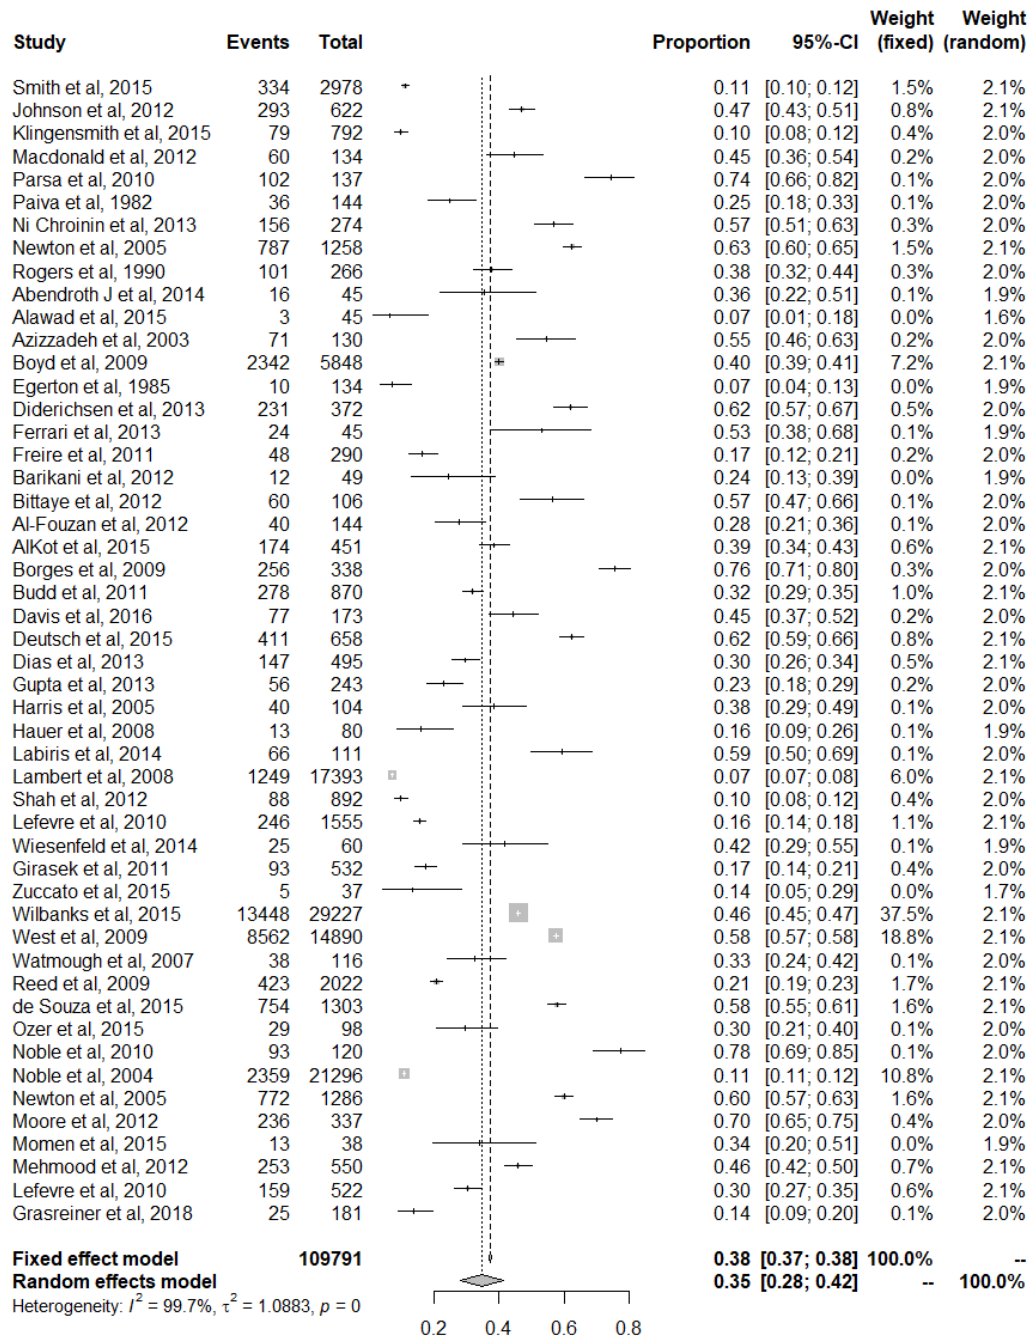

**Figure S10. Forest Plot of “Length of Training”.**

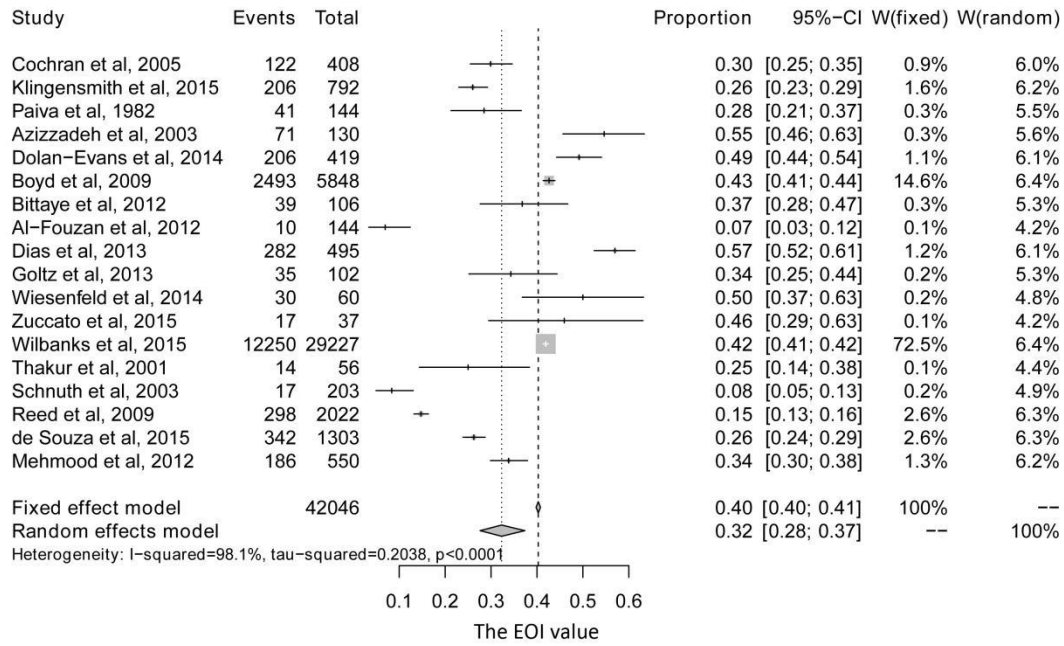

Figure S11. Forest Plot of “Prestige”.

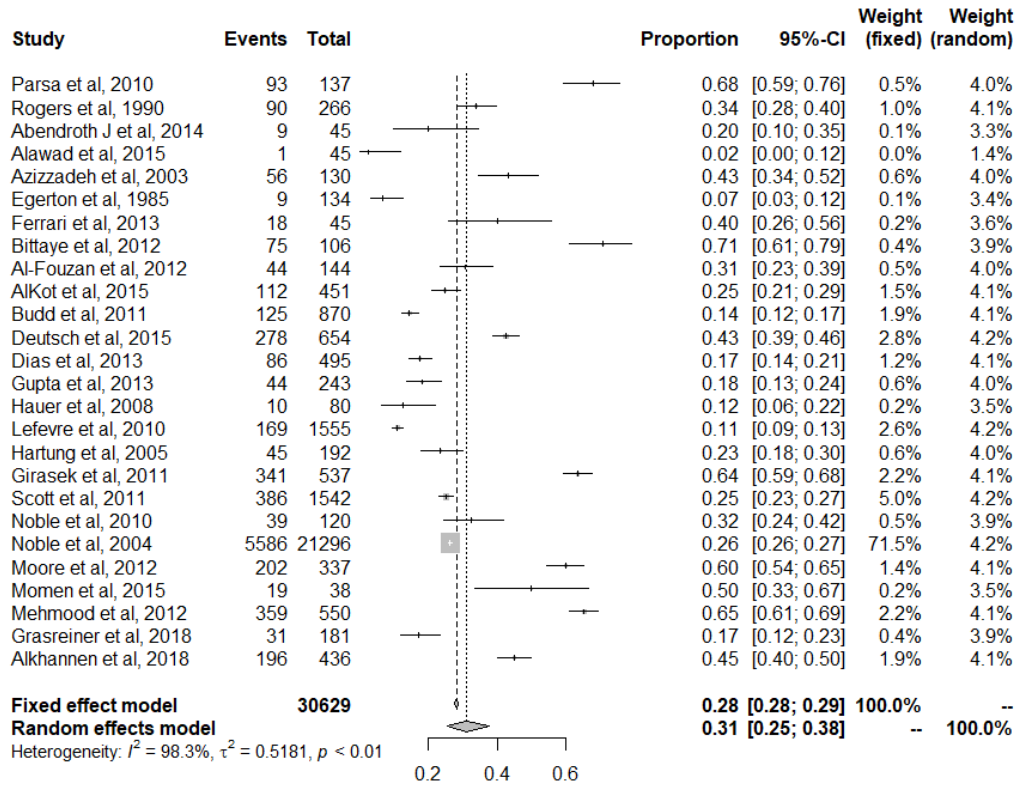

**Figure S12. Forest Plot of “Advice from Others”.**

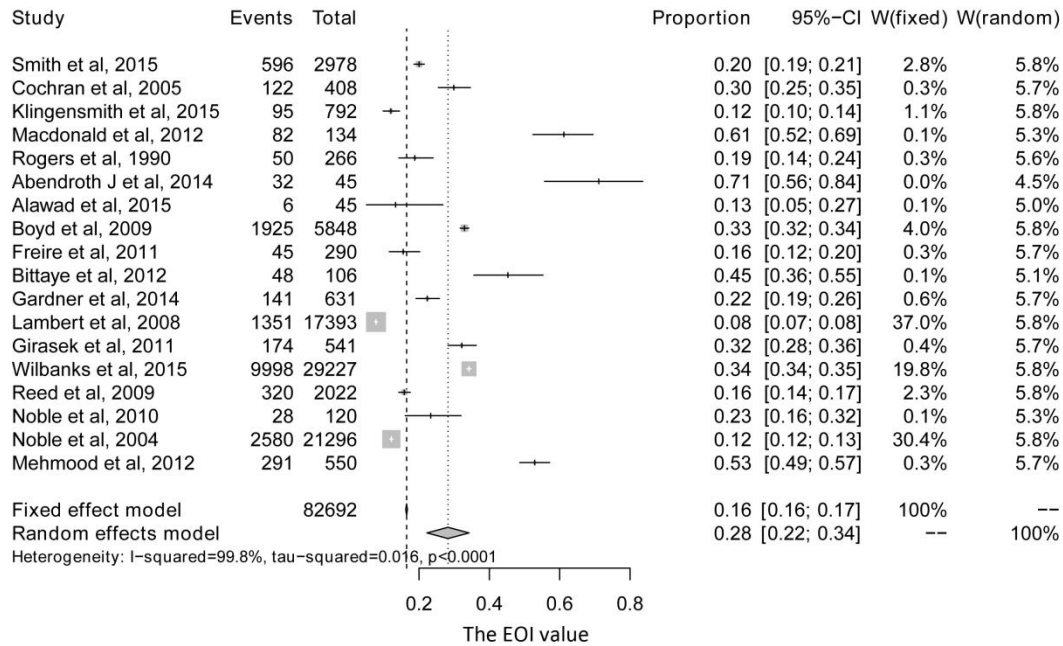

**Figure S13. Forest Plot of “Student Debt”.**

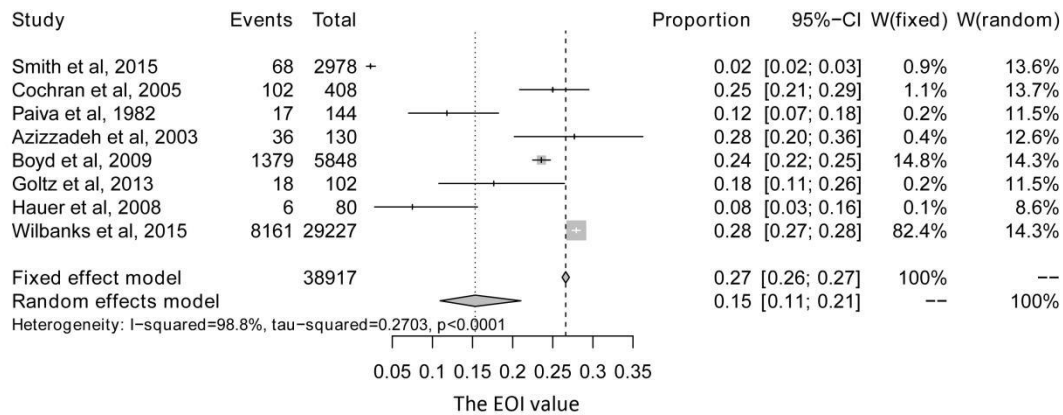

**Figure S14. Funnel Plots of the Publication Bias Testing of the 12 Factors.**

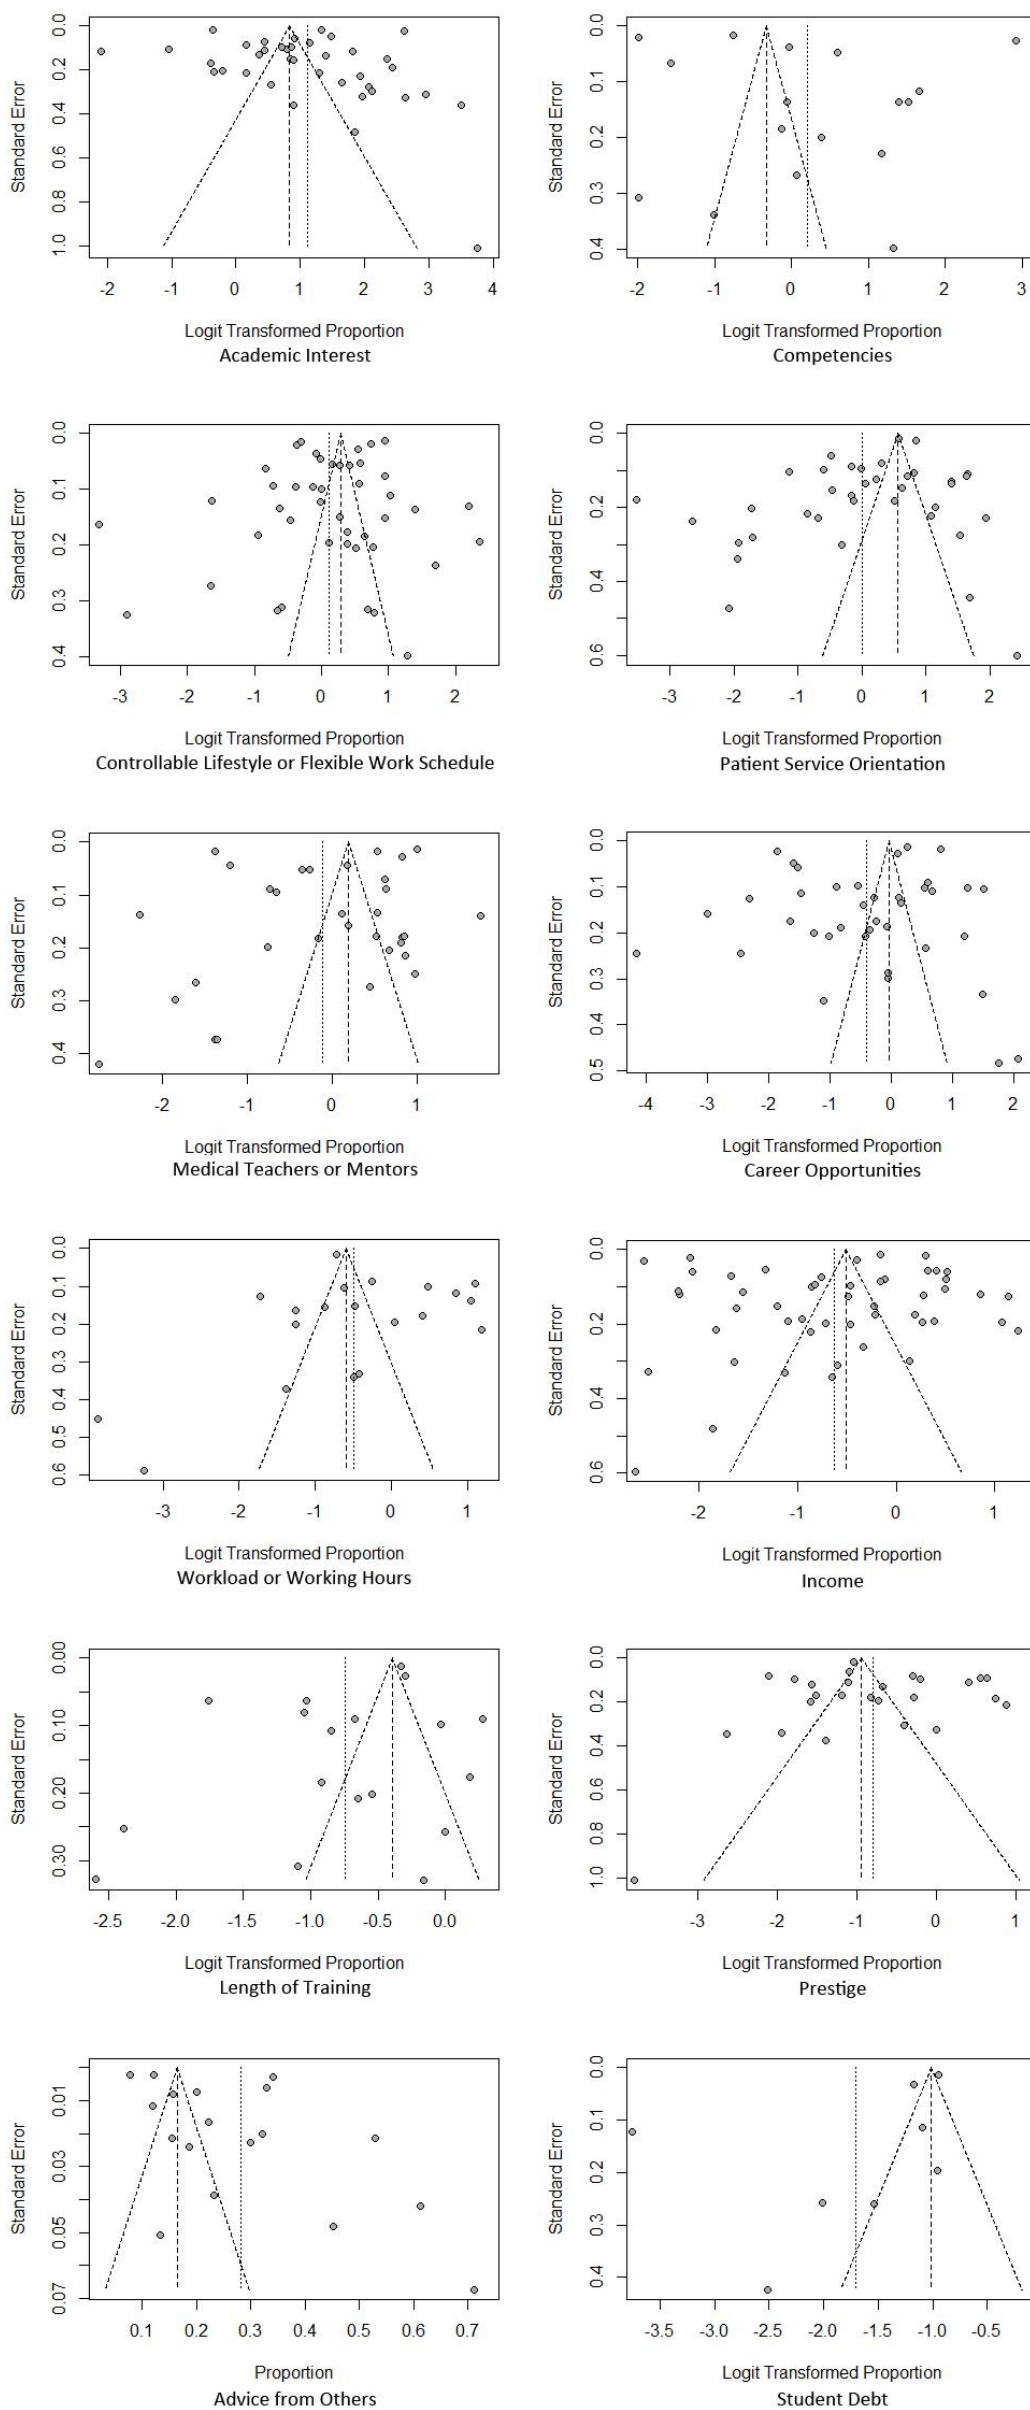

Supplement: bmjopen-2018-022097supp001.pdf [file bmjopen-2018-022097supp001.pdf]
