# Supplementary material for: Factors influencing subspecialty choice among medical students: a systematic review and meta-analysis
Source: PubMed Central journal article supplement — BMJ Open. 2019 Mar 7;9(3):e022097. doi: 10.1136/bmjopen-2018-022097 (PMC6429728; doi:10.1136/bmjopen-2018-022097), 2019-03-07
Supplement: bmjopen-2018-022097.draft_revisions.pdf [file bmjopen-2018-022097.draft_revisions.pdf]

# BMJ Open

BMJ Open is committed to open peer review. As part of this commitment we make the peer review history of every article we publish publicly available.

When an article is published we post the peer reviewers' comments and the authors' responses online. We also post the versions of the paper that were used during peer review. These are the versions that the peer review comments apply to.

The versions of the paper that follow are the versions that were submitted during the peer review process. They are not the versions of record or the final published versions. They should not be cited or distributed as the published version of this manuscript.

BMJ Open is an open access journal and the full, final, typeset and author-corrected version of record of the manuscript is available on our site with no access controls, subscription charges or pay-per-view fees (<http://bmjopen.bmj.com>).

If you have any questions on BMJ Open's open peer review process please email [info.bmjopen@bmj.com](mailto:info.bmjopen@bmj.com)

# BMJ Open

## Factors Influencing Subspecialty Choice Among Medical Students: A Systematic Review and Meta-analysis

|                               |                                                                                                                                                                                                                                                                                                                                                                                                                                                                                                                                                                                                                                                                                                                                                                                                                                                                                                                                                                                                                                                                                                          |
|-------------------------------|----------------------------------------------------------------------------------------------------------------------------------------------------------------------------------------------------------------------------------------------------------------------------------------------------------------------------------------------------------------------------------------------------------------------------------------------------------------------------------------------------------------------------------------------------------------------------------------------------------------------------------------------------------------------------------------------------------------------------------------------------------------------------------------------------------------------------------------------------------------------------------------------------------------------------------------------------------------------------------------------------------------------------------------------------------------------------------------------------------|
| Journal:                      | <i>BMJ Open</i>                                                                                                                                                                                                                                                                                                                                                                                                                                                                                                                                                                                                                                                                                                                                                                                                                                                                                                                                                                                                                                                                                          |
| Manuscript ID                 | bmjopen-2018-022097                                                                                                                                                                                                                                                                                                                                                                                                                                                                                                                                                                                                                                                                                                                                                                                                                                                                                                                                                                                                                                                                                      |
| Article Type:                 | Research                                                                                                                                                                                                                                                                                                                                                                                                                                                                                                                                                                                                                                                                                                                                                                                                                                                                                                                                                                                                                                                                                                 |
| Date Submitted by the Author: | 03-Feb-2018                                                                                                                                                                                                                                                                                                                                                                                                                                                                                                                                                                                                                                                                                                                                                                                                                                                                                                                                                                                                                                                                                              |
| Complete List of Authors:     | <p>Yang, Yahan; Sun Yat-Sen University Zhongshan Ophthalmic Center, State Key Laboratory of Ophthalmology; Sun Yat-Sen University, Zhongshan School of Medicine</p> <p>Li, Jiawei; Sun Yat-Sen University, Zhongshan School of Mathematics</p> <p>Wu, Xiaohang; Sun Yat-Sen University Zhongshan Ophthalmic Center, State Key Laboratory of Ophthalmology</p> <p>Wang, Jinghui; Sun Yat-Sen University Zhongshan Ophthalmic Center, State Key Laboratory of Ophthalmology</p> <p>Li, Wangting; Sun Yat-Sen University Zhongshan Ophthalmic Center, State Key Laboratory of Ophthalmology</p> <p>Zhu, Yi; University of Miami School of Medicine, Department of Molecular and Cellular Pharmacology; Sun Yat-Sen University Zhongshan Ophthalmic Center, Cataract</p> <p>Chen, Chuan; State Key Laboratory of Ophthalmology, Zhongshan Ophthalmic Center, Sun Yat-sen University; University of Miami School of Medicine, Department of Molecular and Cellular Pharmacology</p> <p>Lin, Haotian; State Key Laboratory of Ophthalmology, Zhongshan Ophthalmic Center, Sun Yat-sen University, Cataract</p> |
| Keywords:                     | Medical students, Career choice, Meta-analysis                                                                                                                                                                                                                                                                                                                                                                                                                                                                                                                                                                                                                                                                                                                                                                                                                                                                                                                                                                                                                                                           |

SCHOLARONE™  
Manuscripts

1  
2  
3  
4 **Title Page**  
5  
6

7 **Factors Influencing Subspecialty Choice Among Medical Students: A Systematic**  
8  
9 **Review and Meta-analysis**  
10

11  
12 Yahan Yang, M.D.<sup>1,2</sup>; Jiawei Li, M.D.<sup>3</sup>; Xiaohang Wu, M.D.<sup>1</sup>; Jinghui Wang, M.D.<sup>1</sup>;  
13  
14 Wangting Li, M.D.<sup>1</sup>; Yi Zhu, M.D.<sup>1,4</sup>; Chuan Chen, M.D.<sup>1,4</sup>; Haotian Lin, M.D., Ph.  
15  
16 D<sup>1#</sup>  
17  
18  
19  
20  
21

22 **Institution:** 1. State Key Laboratory of Ophthalmology, Zhongshan Ophthalmic  
23  
24 Center, Sun Yat-sen University, Guangzhou, Guangdong, 510060, People's Republic  
25  
26 of China  
27

28  
29  
30 2. Zhongshan School of Medicine, Sun Yat-sen University, Guangzhou, China  
31

32  
33 3. Zhongshan School of Mathematics, Sun Yat-sen University, Guangzhou, China  
34

35  
36 4. Department of Molecular and Cellular Pharmacology, University of Miami Miller  
37  
38 School of Medicine, Miami, Florida 33136, USA.  
39  
40  
41  
42

43  
44 **#Editorial Correspondence:**  
45

46  
47 Prof. Haotian Lin  
48

49  
50 Zhongshan Ophthalmic Center, Sun Yat-sen University  
51  
52

1  
2  
3  
4 Xian Lie South Road 54#  
5

6  
7 Guangzhou, China, 510060.  
8

9  
10 Telephone number: +86-020-87330493  
11

12  
13 Fax: +86-020-87333271  
14

15  
16 E-mail: haot.lin@hotmail.com  
17

18  
19 Word count for text: 2947  
20  
21  
22  
23  
24  
25  
26  
27  
28  
29  
30  
31  
32  
33  
34  
35  
36  
37  
38  
39  
40  
41  
42  
43  
44  
45  
46  
47  
48  
49  
50  
51  
52  
53

## ABSTRACT

**Objective** To characterize the contributing factors that affect medical students' subspecialty choice and to estimate the extent of influence of individual factors on the students' decision-making process.

**Design** Systematic review and meta-analysis.

**Methods** A systematic search of the Cochrane Library, ERIC, Web of Science, CNKI and PubMed databases was conducted for studies published between January 1977 and October 2016. Information concerning study characteristics, influential factors, and the extent of their influence (EOI) was extracted independently by two trained investigators. EOI is the percentage level that describes how much each of the factors influenced students' choice of subspecialty. The estimates were pooled using a random-effects meta-analysis model due to the between-study heterogeneity.

**Results** Data were extracted from 72 studies (881,502 individuals). Overall, the factors influencing medical students' choice of subspecialty training mainly included academic interests (74.87%), competencies (55.15%), controllable lifestyles or flexible work schedules (53.06%), patient service orientation (49.35%), medical teachers or mentors (46.93%), career opportunities (44.00%), workload or working hours (37.92%), income (35.25%), length of training (32.30%), prestige (31.29%), advice from others (28.24%), and student debt (15.33%), with significant between-study heterogeneity

( $P < 0.0001$ ). Subgroup analyses revealed that the EOI of academic interests was higher in developed countries than that in developing countries (79.30% [95% confidence interval (CI), 70.09%; 86.24%] vs. 60.41% [95% CI, 43.44%; 75.19%];  $Q = 3.37$   $P = 0.02$ ). The EOI value of prestige was lower in developed countries than that in developing countries (24.45% [95% CI, 19.46%; 30.25%] vs. 48.02% [95% CI, 32.40%; 64.03%];  $Q = 4.31$   $P = 0.01$ ).

**Conclusions** This systematic review and meta-analysis provided a quantitative evaluation of the top 12 influencing factors associated with medical students' choice of subspecialty. Our findings provide the basis for the development of specific, effective strategies to optimize the distribution of physicians among different departments by modifying these influencing factors.

**Systematic review registration** PROSPERO CRD42017053781.

#### **STRENGTHS AND LIMITATIONS OF THIS STUDY**

- Our research emphasize that a reliable estimate of the factors associated with medical students' subspecialty choice is critical to obtaining a better understanding of students' perceptions, and the findings of the present study can facilitate the development of intervention strategies tailored to the needs of various healthcare systems.
- A large number of studies conducted in varied populations have been included.

1  
2  
3  
4  
5  
6  
7  
8  
9  
10  
11  
12  
13  
14  
15  
16  
17  
18  
19  
20  
21  
22  
23  
24  
25  
26  
27  
28  
29  
30  
31  
32  
33  
34  
35  
36  
37  
38  
39  
40  
41  
42  
43  
44  
45  
46  
47  
48  
49  
50  
51  
52  
53  
54  
55  
56  
57  
58  
59  
60

- The differences in the characteristics of country, survey years, specialty, the type of data used and sample size across studies represent a major limitation of our study.

KEYWORDS Medical students, career choice, meta-analysis

For peer review only

## Introduction

Medical students' choice of subspecialty represents the process that students' majored in medicine decide to choose a medical specialty, such as pediatrics and surgery, and their sub-discipline, such as nephrology and neurosurgery. With the development of the social economy and the improvement in people's living standards, the demand for physicians continues to increase; however, an imbalance in the supply of physicians in different subspecialties has become a growing concern in both developed and developing countries.<sup>1 2</sup> Some subspecialties, such as family medicine and palliative medicine,<sup>3 4</sup> are experiencing a desperate shortage of physicians, whereas other subspecialties, such as cardiology, ophthalmology and ear, nose and throat (ENT) surgery, require several years of training before admission due to intense competition.<sup>5 6</sup>

Specialty choice is the product of a complex interconnection of student expectation, department expectation, and competition for available spots, and student choice is where the choice begins.<sup>7</sup> Previous studies have suggested that medical students' choice of subspecialty is essential to the maintenance of an adequate medical workforce and a balanced development of the medical system.<sup>8 9</sup> However, the influencing factors underlying students' subspecialty choice have not been systemically reviewed. Recent changes in the training and practice environment may influence medical students' career choice.<sup>10</sup> Additionally, the variability in preferences over time and in students' attitudes towards career choices can further complicate this assessment. For example, a study in the UK indicated that half of the



1  
2  
3  
4 medical students made a definitive subspecialty choice during their first year of  
5  
6 medical school.<sup>11</sup> However, students were prone to changing their subspecialty  
7  
8 preference during medical school and internship.<sup>12</sup> Notably, students may also reject  
9  
10 certain subspecialties during their medical school training, even those they have  
11  
12 previously seriously considered.<sup>13</sup> Therefore, identifying the factors that influence  
13  
14 students' choice of subspecialty will enable a better understanding of the current  
15  
16 shortage/overload of physicians in specific fields and contribute to policy-building  
17  
18 and decision-making to improve the training and recruitment of students in the future.  
19  
20

21  
22 We thus conducted a systematic review and a meta-analysis to investigate the  
23  
24 influencing factors and the extent of their influence on the choice of subspecialty  
25  
26 training among medical students. More specifically, we focused on the following  
27  
28 questions. First, can we gain a better understanding of students' preferences for  
29  
30 medical specialty according to the primary influencing factor? Second, do the  
31  
32 subgroups according to world region and survey years examined in this study differ  
33  
34 significantly with regard to the weight that students place on the identified  
35  
36 influencing factor?  
37  
38

## 39 40 **Methods**

### 41 42 **Search Strategy and Study Eligibility**

43  
44 Cross-sectional studies published between January 1977 and October 2016 that  
45  
46 reported on factors influencing medical students' choice of subspecialty were  
47  
48 identified using the Cochrane Library, Medline, Web of Science, CNKI and ERIC  
49  
50  
51  
52

1  
2  
3  
4 databases. Articles were screened by title, abstract and reference list, and by  
5  
6 correspondence with study investigators using the approach recommended by the  
7  
8 Preferred Reporting Items for Systematic Reviews and Meta-Analyses (PRISMA)  
9  
10 guidelines (**Fig. S1**).<sup>14</sup> Potentially relevant papers were first identified by reviewing  
11  
12 the titles and abstracts, and the full text of each retrieved article was then assessed.  
13  
14 The search strategy is shown in **Methods S1**. Studies were included if they reported  
15  
16 data on medical students, were published in peer-reviewed journals, and used a  
17  
18 validated method to assess the extent of a factor's influence on the choice of  
19  
20 subspecialty.  
21  
22

### 23 24 **Data Extraction and Quality Assessment**

25  
26  
27 The following information was independently extracted from each article by 2 trained  
28  
29 investigators (Y.Y. and J.L.) using a standardized form: study design, geographic  
30  
31 location, years of survey, journal, sample size, average age of the participants, the  
32  
33 number and percentage of male participants, and the influencing factors and the  
34  
35 extent of their influence. Each study may involve one or several influencing factors.  
36  
37 The Newcastle-Ottawa Scale (NOS) recommended by the Agency for Healthcare  
38  
39 Research and Quality (AHRQ), available at  
40  
41 [http://www.ohri.ca/programs/clinical\\_epidemiology/oxford.asp](http://www.ohri.ca/programs/clinical_epidemiology/oxford.asp), were used to assess  
42  
43 the quality of the studies. All discrepancies were resolved via discussion and  
44  
45 consensus.  
46  
47  
48  
49

### 50 **Statistical Analysis**

1  
2  
3  
4 As considerable heterogeneity was expected because of the multiple sources of  
5  
6 variances, a random effects meta-analysis model was used to estimate the influencing  
7  
8 factors and the extent of their influence.<sup>15</sup> Between-study heterogeneity was assessed  
9  
10 using the  $I^2$  statistic, which was calculated to describe the percentage of total  
11  
12 variation caused by heterogeneity across studies, with  $\geq 50\%$  indicating considerable  
13  
14 heterogeneity.<sup>16 17</sup> Potential sources of heterogeneity were identified using  
15  
16 meta-regression.<sup>18</sup> Subgroup analyses were performed for each factor in the studies in  
17  
18 developed countries vs. developing countries and studies conducted before 2010 vs.  
19  
20 after 2010. The EOI value of competencies in developing countries was not  
21  
22 statistically significant (81.21% [95% CI, 75.27%; 86.51%],  $P=0.1436$ ), and no  
23  
24 studies on the influence of student debt in developing countries were found. The  
25  
26 Q-test based on the analysis of variance was used to compare the subgroups, with a  
27  
28 significance threshold of 5%.<sup>19</sup> The influence of individual studies on the overall EOI  
29  
30 value was explored by serially excluding each study in a sensitivity analysis.  
31  
32 Publication bias was investigated using a funnel plot test and Egger's test.<sup>20 21</sup> All  
33  
34 analyses were performed using R (version 3.3.1, The R Foundation, Vienna, Austria).  
35  
36 The statistical tests were 2-sided with a significance threshold of  $P<0.05$ .  
37  
38  
39  
40  
41

## 42 **Results**

### 43 **Study Characteristics**

44  
45 Seventy-two studies involving a total of 881,502 individuals were included in the  
46  
47 present research (**Table 1**). Thirty-three studies were conducted in North America, 23  
48  
49 in Europe, 6 in Asia, 5 in Oceania, 3 in Africa, and 2 in South America. The median  
50  
51  
52  
53  
54

1  
2  
3  
4 number of participants per study was 254.5 (range 37-29,227). Thirteen studies  
5  
6 included students who had already selected subspecialties, whereas 59 did not. The  
7  
8 influencing factors for subspecialty choice were classified according to 17 aspects,  
9  
10 including academic interests, controllable lifestyle or flexible work schedule (defined  
11  
12 as flexibility that allows physicians to control the number of hours devoted to  
13  
14 practicing the specialty), competencies, patient service orientation, medical teachers  
15  
16 or mentors, career opportunities, workload or working hours (characterized by the  
17  
18 physician's time spent on professional responsibilities), income, prestige, length of  
19  
20 training, advice from others (advice from family, friends, and other students), student  
21  
22 debt, experience with the subject, working environment, personality, gender and job  
23  
24 security. The influencing factors were ranked according to the frequency of  
25  
26 occurrence and each factor was identified when at least 5 papers were available  
27  
28 describing it. Personality and gender are common factors that affect the choice of  
29  
30 subspecialty among medical students, but most of the relevant literature has not  
31  
32 reported on the extent of these factors' influence. Moreover, the funnel plots were  
33  
34 clearly asymmetrical with regard to experience with the subject, the working  
35  
36 environment and job variety, indicating the existence of publication bias. Thus, the  
37  
38 analysis of the remaining 12 influencing factors were shown in this paper. Quality  
39  
40 assessment scores for the included studies are listed in **Table 1**. None of the studies  
41  
42 received a point for the second AHRQ Quality Indicator, which requires studies to list  
43  
44 the inclusion and exclusion criteria for exposed and unexposed subjects (cases and  
45  
46 controls) or refer to previous publications, since no comparison studies were  
47  
48 referenced in the analyzed articles. For the remaining 10 criteria, 6 studies received 9  
49  
50  
51  
52  
53

1  
2  
3  
4 points, 8 studies received 8 points, 17 studies received 7 points, 32 studies received 6  
5  
6 points, 7 studies received 5 points and 2 studies received 4 points (scores for  
7  
8 individual studies are presented in **Table S1**).  
9

### 10 11 **Primary Analysis**

12  
13  
14 A meta-analysis was performed on the 12 influencing factors (**Table 2**): academic  
15 interests (**Fig. S2**), competencies (**Fig. S3**), controllable lifestyle or flexible work  
16 schedule (**Fig. S4**), patient service orientation (**Fig. S5**), medical teachers or mentors  
17 (**Fig. S6**), career opportunities (**Fig. S7**), workload or working hours (**Fig. S8**),  
18 income (**Fig. S9**), length of training (**Fig. S10**), prestige (**Fig. S11**), advice from  
19 others (**Fig. S12**) and student debt (**Fig. S13**). All the factors were significant with  
20 evidence of between-study heterogeneity ( $P < 0.0001$ ). A sensitivity analysis, in which  
21 the meta-analysis was serially repeated after the exclusion of each study,  
22 demonstrated that no individual study affected the overall extent of a factor's  
23 influence.  
24  
25  
26  
27  
28  
29  
30  
31  
32  
33  
34  
35  
36

### 37 **Meta-regression and Subgroup Analysis**

38  
39  
40 Using common instructions when at least 5 studies were available and at least 2  
41 studies were in each comparator subgroup, four categorical covariates were identified  
42 as potential sources of heterogeneity by examining the studies conducted in the  
43 United States (US) vs. the studies conducted in other countries, the studies conducted  
44 before 2010 vs. those conducted after 2010, the studies concerning subspecialty only  
45 vs. those that were not specific to a subspecialty, and the studies with a sample size  
46  
47  
48  
49  
50  
51  
52

1  
2  
3  
4 <200 vs. the studies with a sample size  $\geq 200$  (**Table 3**). Some of the heterogeneities  
5  
6 observed among the 12 factors can be partially explained by country, survey years,  
7  
8 specialty and sample size.  
9

10  
11 EOI values were further analyzed by subgroup (**Table S2**) according to world region  
12  
13 (**Fig. 1**) and survey year (**Fig. 2**). The EOI value of academic interests in developed  
14  
15 countries was higher than that in developing countries (79.30% [95% CI, 70.09%;  
16  
17 86.24%] vs. 60.41% [95% CI, 43.44%; 75.19%];  $Q=3.37$   $P=0.02$ ). Conversely, a  
18  
19 lower EOI value of prestige was found in studies conducted in developed countries  
20  
21 than in developing countries (24.45% [95% CI, 19.46%; 30.25%] vs. 48.02% [95%  
22  
23 CI, 32.40%; 64.03%];  $Q=4.31$   $P=0.01$ ). No statistically significant subgroup  
24  
25 differences in the EOI values of the other influencing factors were noted between  
26  
27 developed countries and developing countries. In addition, no statistically significant  
28  
29 differences in the EOI values of the influencing factors were observed when  
30  
31 subgroup analysis was performed by survey year.  
32  
33  
34  
35

### 36 **Assessment of Publication Bias**

37  
38  
39 We generated a funnel plot with proportion as the abscissa and standard error as the  
40  
41 ordinate. A visual inspection of the funnel plots revealed minimal asymmetry among  
42  
43 the various influencing factors (**Fig. S14**), and the results were concentrated in the  
44  
45 narrow upper part of the graph. However, there was evidence of small study effect in  
46  
47 the meta-analysis of “patient service orientation” (Egger’s test  $P=0.02$ ).  
48  
49

### 50 **Discussion**

## Implications

This systematic review and meta-analysis involved 72 studies with 881,502 medical students. Twelve influencing factors were analyzed. These factors can be classified into two categories: economic factors and non-economic factors. We found that the EOI of the economic factors, including income (35.25%) and student debt (15.33%), may not depend on the region's level of economic development. However, income remained a major influencing factor in the process of choosing a subspecialty. In the US, 15% of full-time family medicine physicians earned less than \$100,000 in 2004, which is significantly less than the income earned by invasive cardiologists (median income=\$427,815), neurosurgeons (median income=\$211,094), and orthopedists (median income=\$335,646).<sup>22</sup> This economic inequality made family medicine less attractive to medical school graduates.<sup>23</sup> Benefits such as health insurance and tuition reimbursement have been shown to be the most common economic incentives used to attract applicants.<sup>24</sup>

The non-economic factors can be divided into individual factors, specialty-related factors and others. First, individual factors, including academic interest and competencies, have a considerable impact on students' subspecialty choice, with EOI values of 74.87% and 55.15%, respectively. In addition, in the subgroup analysis, although academic interests were less influential in developing countries than in developed countries (79.30% [95% CI, 70.09%; 86.24%] vs. 60.41% [95% CI, 43.44%; 75.19%];  $Q=3.37$   $P=0.02$ ), they were still the most influential of the 12 factors regardless of regional economic level. These findings indicate that

1  
2  
3  
4 subspecialties with a shortage of manpower may attract more students by increasing  
5  
6 students' interests and improving the quality of education. Previous studies indicated  
7  
8 that early subspecialty exposure in medical education may arouse students' academic  
9  
10 interest and improve their clinical competence.<sup>23 25</sup> For example, an elective  
11  
12 extracurricular program designed to facilitate early contact with family medicine  
13  
14 physicians was found to significantly improve students' interest and clinical skills,  
15  
16 especially communication skills, in family medicine.<sup>26</sup> Furthermore, dispelling myths  
17  
18 and espousing the positive aspects of a discipline may provide a better understanding  
19  
20 of certain subspecialties; this approach could also be effective in increasing students'  
21  
22 academic interest.<sup>27</sup> For instance, family medicine is often considered a discipline  
23  
24 that requires less professional skills and knowledge. This misconception demotivates  
25  
26 students from choosing family medicine as their future career subspecialty, and this  
27  
28 trend may eventually lead to a shortage of family physicians.<sup>27</sup> Eliminating such  
29  
30 prejudices may help students pay greater attention to the areas in short supply and  
31  
32 restore their interests in other specialties.  
33  
34  
35

36  
37  
38 Second, the specialty-related factors included controllable lifestyle/flexible work  
39  
40 schedule (EOI of 53.06%), career opportunities (EOI of 44.00%), workload (EOI of  
41  
42 37.92%) and training length (EOI of 32.30%). Of these factors, lifestyle varied  
43  
44 between different areas. Additionally, although certain specialties, such as general  
45  
46 surgery, seem to have an adequate number of surgeons on a per capita basis in the US,  
47  
48 there is still a poor geographic distribution within the surgical workforce according to  
49  
50 the type of surgical practice.<sup>28</sup> The inflexible lifestyle is a common reason that  
51  
52  
53



1  
2  
3  
4 students perceive surgery to be less attractive.<sup>28</sup> Reorganization of expected work  
5  
6 hours within shared practices and the increased use of physician extenders and  
7  
8 technologies such as electronic medical records may give physicians more flexibility  
9  
10 in work schedules.<sup>29</sup> Moreover, providing promotion opportunities and shortening the  
11  
12 length of training are possible strategies to recruit new staff in subspecialties that  
13  
14 require a long period of post-graduate residency training, such as neurosurgery.<sup>30</sup>

15  
16  
17  
18 Finally, other factors such as service orientation (EOI of 49.35%), medical teachers  
19  
20 or mentors (EOI of 46.93%), prestige (EOI of 31.29%), and advice from others (EOI  
21  
22 of 28.24%) also contribute to the decision-making process of medical students. For  
23  
24 example, the desire to care for patients with end-stage diseases contributed to the  
25  
26 decision to enter palliative medicine in 86% of the medical students.<sup>4</sup> Additionally,  
27  
28 exposure to mentors in a particular clinical field such as internal medicine has been  
29  
30 strongly associated with medical students' choice of clinical field.<sup>31</sup> Moreover,  
31  
32 improving the occupational prestige of areas such as family medicine, pathology, and  
33  
34 radiology may help reshape the distribution of the workforce.<sup>25 32 33</sup>

35  
36  
37  
38 In our study, several findings are especially noteworthy. First, interest was far more  
39  
40 important than income in deciding subspecialty. In our study, interest was the  
41  
42 top-ranked influencing factor (EOI of 74.87%) of subspecialty choice, while income  
43  
44 was ranked lower (EOI of 35.25%). This finding argues against the possible default  
45  
46 belief that raising physician's wages alone could solve the uneven distribution of  
47  
48 clinicians among subspecialties. Our findings highlight that cultivating and  
49  
50 stimulating students' professional interests may help improve the maldistribution of  
51  
52

1  
2  
3  
4 medical resources in a more efficient and cost-saving manner.  
5  
6

7 Second, improving abilities in a certain subspecialty of interest can greatly affect  
8 medical students' professional choice. In our study, competencies ranked second in  
9 influence, which may reflect the impact of admission conditions on students' choice  
10 of subspecialty. Hence, to reduce the risk that students are restricted to the  
11 subspecialty of their interest due to a lack of personal skills, medical education  
12 should focus more on enhancing students' personal competencies in addition to their  
13 academic interests.  
14  
15  
16  
17  
18  
19  
20  
21  
22

23 Third, balancing medical resources is a complex process in practical terms, as the  
24 influencing factors are not mutually exclusive. The shortage of physicians in certain  
25 subspecialties may increase physician workload, resulting in less time for teaching.  
26 Hence, the quality of teaching cannot be guaranteed, and students may tend to avoid  
27 choosing these subspecialties, thus worsening the imbalance in the medical  
28 workforce. Additionally, some of the 12 factors identified are not amenable to  
29 practical interventions. For example, prestige cannot be immediately increased using  
30 interventional strategies.<sup>32</sup> Overall, effective strategies must be multi-pronged and  
31 incorporate several different aspects, and maldistribution in the workforce should not  
32 be tackled through a simple adjustment of one influencing factor.  
33  
34  
35  
36  
37  
38  
39  
40  
41  
42  
43  
44

#### 45 **Interpretations of the results of this meta-analysis**

46  
47  
48 Our meta-regression stratified by the study-level characteristics found that country,  
49 survey years, subspecialty and sample size may contribute to the heterogeneity  
50  
51  
52

1  
2  
3  
4 between studies. There was no significant difference in the sensitivity analysis, which  
5 indicated that the results of the meta-analysis were convincing. The funnel plots and  
6  
7 Egger's tests revealed that most of the publication bias was small ( $P>0.05$ ), except  
8  
9 for the meta-analysis of "patient service orientation". Moreover, the majority of the  
10  
11 studies collected in the database were from developed countries rather than  
12  
13 developing countries.  
14  
15

### 16 17 18 **Limitations**

19  
20 Several limitations should be considered when interpreting the findings of this study.  
21  
22 First, the students involved in our study included medical students at different stages  
23  
24 of their medical education. Students' perception about different subspecialties may  
25  
26 change during medical training. For example, compared to an intern, a freshman  
27  
28 student may place greater emphasis on income and prestige when considering a  
29  
30 career choice.<sup>34</sup> Second, our meta-analysis summarized the data from different  
31  
32 geographic regions around the world, and the general conclusions may not be  
33  
34 appropriate to guide policy development in each region. Enhanced effort is needed to  
35  
36 develop specific intervention strategies according to the specific medical career grade,  
37  
38 economic level, religious beliefs, healthcare system, educational system and endemic  
39  
40 diseases of different countries and regions. Third, the surveys in the various studies  
41  
42 were also conducted using different methods. Most of the questionnaires used a  
43  
44 Likert scale. Therefore, when we converted the results to a percentage representing  
45  
46 the extent of a factor's influence, the Likert scale items were treated as interval  
47  
48 data.<sup>35-37</sup> Consequently, there may have been differences in the conversion process.  
49  
50  
51  
52

1  
2  
3  
4 Fourth, a secondary meta-analysis of longitudinal studies may better reflect changes  
5  
6 in influencing factors and the extent of their influence over time. Finally, the analysis  
7  
8 relied on aggregated published data. A multicenter prospective study would provide a  
9  
10 more accurate estimate of the influencing factors and the extent of their influence on  
11  
12 medical students' choice of subspecialty.  
13  
14

## 15 **Conclusion**

16  
17  
18 In conclusion, this systematic review and meta-analysis provided a summary  
19  
20 evaluation of 12 influencing factors and the extent of their influence on the choice of  
21  
22 subspecialty training among medical students. Understanding students' attitudes  
23  
24 toward their subspecialty decision-making process could provide the basis for  
25  
26 developing strategies to increase the attractiveness of subspecialties experiencing a  
27  
28 shortage of manpower, thereby balancing the distribution of medical recourses.  
29  
30  
31  
32  
33  
34  
35  
36  
37  
38  
39  
40  
41  
42  
43  
44  
45  
46  
47  
48  
49  
50  
51  
52  
53  
54  
55  
56  
57  
58  
59  
60

1  
2  
3  
4 **Contributors:** Haotian Lin contributed to the conceptualising and design of the study,  
5  
6 and to research funding, coordinated the research and oversaw the project. Yahan  
7  
8 Yang, Jiawei Li and Xiaohang Wu contributed to data collection and interpretation,  
9  
10 and to data analysis. Jinghui Wang, Yi Zhu, Chuan Chen and Wangting Li contributed  
11  
12 to the design of the study. All authors contributed to the drafting and revision of the  
13  
14 paper and approved the final manuscript for publication.  
15  
16

17  
18 **Funding:** The principal investigator of this study (Haotian Lin) is currently  
19  
20 supported by the Pearl River Scholar Program of Guangdong Province, the  
21  
22 Outstanding Young Teacher Cultivation Projects in Guangdong Province  
23  
24 (YQ2015006), and the Guangdong Provincial Natural Science Foundation for  
25  
26 Distinguished Young Scholars of China (2014A030306030). These sponsors and  
27  
28 funding organizations had no role in the design or performance of this study.  
29  
30

31  
32 **Competing Interests:** The authors declare no competing financial interests.  
33  
34

35 **Data sharing:** No additional data available.  
36  
37  
38  
39  
40  
41  
42  
43  
44  
45  
46  
47  
48  
49  
50  
51  
52  
53  
54  
55  
56  
57  
58  
59  
60

**References**

1. Zurn P, Dal Poz MR, Stilwell B, et al. Imbalance in the health workforce. *Hum Resour Health* 2004;2(1):13. doi: 10.1186/1478-4491-2-13
2. Diallo K, Zurn P, Gupta N, et al. Monitoring and evaluation of human resources for health: an international perspective. *Hum Resour Health* 2003;1(1):3. doi: 10.1186/1478-4491-1-3
3. Bodenheimer T. Primary care--will it survive? *N Engl J Med* 2006;355(9):861-4. doi: 10.1056/NEJMp068155
4. LeGrand SB, Heintz JB. Palliative Medicine Fellowship: A Study of Resident Choices. *Journal of Pain and Symptom Management* 2012;43(3):558-68. doi: 10.1016/j.jpainsymman.2011.04.018
5. Kim YY, Kim UN, Kim YS, et al. Factors associated with the specialty choice of Korean medical students: a cross-sectional survey. *Human Resources for Health* 2016;14:8. doi: 10.1186/s12960-016-0141-8
6. McNally SA. Competition ratios for different specialties and the effect of gender and immigration status. *J R Soc Med* 2008;101(10):489-92. doi: 10.1258/jrsm.2008.070284
7. Reed VA, Jernstedt GC, Reber ES. Understanding and improving medical student specialty choice: a synthesis of the literature using decision theory as a referent. *Teach Learn Med* 2001;13(2):117-29. doi: 10.1207/S15328015TLM1302\_7
8. Al-Ansari SS, Khafagy MA. FACTORS AFFECTING THE CHOICE OF HEALTH SPECIALTY BY MEDICAL GRADUATES. *Journal of Family & Community Medicine* 2015;13(3):119-23.
9. Leduc N, Vanasse A, Scott I, et al. The career decision-making process of medical students and residents and the choice of specialty and practice location: how does Postgraduate Medical Education fit in? 2011
10. Delamothe T. Modernising Medical Careers: final report. *BMJ* 2008;336(7635):54-55.
11. Goldacre MJ, Laxton L, Harrison EM, et al. Early career choices and successful career progression in surgery in the UK: prospective cohort studies. *Bmc Surgery* 2010;10:11. doi: 10.1186/1471-2482-10-32
12. Weissman C, Zisk-Rony RY, Schroeder JE, et al. Medical specialty considerations by medical students early in their clinical experience. *Isr J Health Policy Res* 2012;1(1):13. doi: 10.1186/2045-4015-1-13
13. Jackson C, Ball J, Hirsh W, et al. Informing choices: the need for career advice in medical training. *Cambridge: National institute for careers Education and Counseling* 2003
14. Moher D, Liberati A, Tetzlaff J, et al. Preferred reporting items for systematic reviews and meta-analyses: the PRISMA statement. *J Clin Epidemiol* 2009;62(10):1006-12. doi: 10.1016/j.jclinepi.2009.06.005
15. Borenstein M, Hedges LV, Higgins JP, et al. A basic introduction to fixed-effect and random-effects models for meta-analysis. *Res Synth Methods* 2010;1(2):97-111. doi: 10.1002/jrsm.12
16. Higgins JP, Thompson SG, Deeks JJ, et al. Measuring inconsistency in meta-analyses. *BMJ* 2003;327(7414):557-60. doi: 10.1136/bmj.327.7414.557
17. Higgins JP, Thompson SG. Quantifying heterogeneity in a meta-analysis. *Stat Med* 2002;21(11):1539-58. doi: 10.1002/sim.1186
18. Sterne JA, Juni P, Schulz KF, et al. Statistical methods for assessing the influence of study characteristics on treatment effects in 'meta-epidemiological' research. *Stat Med* 2002;21(11):1513-24. doi: 10.1002/sim.1184

19. Borenstein M, Hedges LV, Higgins J, et al. Criticisms of meta-analysis. *Introduction to meta-analysis* 2009;377-87.
20. Egger M, Davey Smith G, Schneider M, et al. Bias in meta-analysis detected by a simple, graphical test. *BMJ* 1997;315(7109):629-34.
21. Sterne JA, Egger M. Funnel plots for detecting bias in meta-analysis: guidelines on choice of axis. *J Clin Epidemiol* 2001;54(10):1046-55.
22. Bodenheimer T, Berenson RA, Rudolf P. The primary care-specialty income gap: why it matters. *Annals of internal medicine* 2007;146(4):301-6.
23. Bodenheimer T, Pham HH. Primary care: current problems and proposed solutions. *Health Aff (Millwood)* 2010;29(5):799-805. doi: 10.1377/hlthaff.2010.0026
24. Association AH. The hospital workforce shortage: Immediate and future. *Trend Watch* 2001;3(2):1-8.
25. Compton MT, Frank E, Elon L, et al. Changes in US medical students' specialty interests over the course of medical school. *Journal of General Internal Medicine* 2008;23(7):1095-100. doi: 10.1007/s11606-008-0579-z
26. Indyk D, Deen D, Fornari A, et al. The influence of longitudinal mentoring on medical student selection of primary care residencies. *BMC medical education* 2011;11(1):27.
27. Gill H, McLeod S, Duerksen K, et al. Factors influencing medical students' choice of family medicine Effects of rural versus urban background. *Canadian Family Physician* 2012;58(11):E649-E57.
28. Richardson JD. Workforce and lifestyle issues in general surgery training and practice. *Archives of surgery (Chicago, Ill : 1960)* 2002;137(5):515-20.
29. Newton DA, Grayson MS, Thompson LF. The variable influence of lifestyle and income on medical students' career specialty choices: data from two U.S. medical schools, 1998-2004. *Academic medicine : journal of the Association of American Medical Colleges* 2005;80(9):809-14.
30. Orrico K. Ensuring an adequate neurosurgical workforce for 21st century. *Surgeons Aaon* 2012
31. Wright SM, Wong A, Newill CA. The impact of role models on medical students. *Journal of General Internal Medicine* 1997;12(1):53-56.
32. Glazer GM, Ruiz-Wibbelsmann JA. Decades of perceived mediocrity: prestige and radiology. *Radiology* 2011;260(2):311-16.
33. Schwartzbaum AM, McGrath JH, Rothman RA. The perception of prestige differences among medical subspecialties. *Soc Sci Med* 1973;7(5):365-71.
34. Parsa S, Aghazadeh A, Nejatiasafa AA, et al. Freshmen versus Interns' Specialty Interests. *Archives of Iranian Medicine* 2010;13(6):509-15.
35. Komorita SS. Attitude Content, Intensity, and the Neutral Point on a Likert Scale. *J Soc Psychol* 1963;61:327-34. doi: 10.1080/00224545.1963.9919489
36. Baggaley AR, Hull AL. The effect of nonlinear transformations on a Likert scale. *Eval Health Prof* 1983;6(4):483-91.
37. Norman G. Likert scales, levels of measurement and the "laws" of statistics. *Advances in health sciences*

- education : theory and practice 2010;15(5):625-32. doi: 10.1007/s10459-010-9222-y
38. Smith F, Lambert TW, Goldacre MJ. Factors influencing junior doctors' choices of future specialty: trends over time and demographics based on results from UK national surveys. *Journal of the Royal Society of Medicine* 2015;108(10):396-405. doi: 10.1177/0141076815599674
39. Cochran A, Melby S, Neumayer LA. An Internet-based survey of factors influencing medical student selection of a general surgery career. *American Journal of Surgery* 2005;189(6):742-46. doi: 10.1016/j.amjsurg.2005.03.019
40. Hauer KE, Durning SJ, Kernan WN, et al. Factors associated with medical students' career choices regarding internal medicine. *Jama-Journal of the American Medical Association* 2008;300(10):1154-64. doi: 10.1001/jama.300.10.1154
41. Johnson AL, Sharma J, Chinchilli VM, et al. Why do medical students choose orthopaedics as a career? *The Journal of bone and joint surgery American volume* 2012;94(11):e78. doi: 10.2106/jbjs.k.00826 [published Online First: 2012/05/29]
42. Kiolbassa K, Miksch A, Hermann K, et al. Becoming a general practitioner - Which factors have most impact on career choice of medical students? *Bmc Family Practice* 2011;12:7. doi: 10.1186/1471-2296-12-25
43. Klingensmith ME, Cogbill TH, Luchette F, et al. Factors Influencing the Decision of Surgery Residency Graduates to Pursue General Surgery Practice Versus Fellowship. *Annals of Surgery* 2015;262(3):449-55. doi: 10.1097/sla.0000000000001435
44. Lee JY, Kerbl DC, McDougall EM, et al. Medical Students Pursuing Surgical Fields Have No Greater Innate Motor Dexterity than Those Pursuing Nonsurgical Fields. *Journal of Surgical Education* 2012;69(3):360-63. doi: 10.1016/j.jsurg.2011.11.005
45. Macdonald C, Cawood T. Factors influencing career decisions in internal medicine. *Internal Medicine Journal* 2012;42(8):918-23. doi: 10.1111/j.1445-5994.2012.02793.x
46. Paiva RE, Vu NV, Verhulst SJ. The effect of clinical experiences in medical school on specialty choice decisions. *J Med Educ* 1982;57(9):666-74.
47. Ni Chroinin D, Cronin E, Cullen W, et al. Would you be a geriatrician? Student career preferences and attitudes to a career in geriatric medicine. *Age Ageing* 2013;42(5):654-7. doi: 10.1093/ageing/af093 [published Online First: 2013/08/07]
48. Rogers LQ, Fincher RM, Lewis LA. Factors influencing medical students to choose primary care or non-primary care specialties. *Academic medicine : journal of the Association of American Medical Colleges* 1990;65(9 Suppl):S47-8.
49. Abendroth J, Schnell U, Lichte T, et al. Motives of former interns in general practice for speciality-choice--results of a cross-sectional study among graduates 2007 to 2012. *GMS Zeitschrift für medizinische Ausbildung* 2014;31(1):Doc11. doi: 10.3205/zma000903 [published Online First: 2014/02/28]
50. Alawad A, Khan WS, Abdelrazig YM, et al. Factors considered by undergraduate medical students when selecting specialty of their future careers. *Pan African Medical Journal* 2015;20:6. doi: 10.11604/pamj.2015.20.102.4715
51. Azizzadeh A, McCollum CH, Miller CC, 3rd, et al. Factors influencing career choice among medical students interested in surgery. *Curr Surg* 2003;60(2):210-3. doi: 10.1016/s0149-7944(02)00679-7 [published Online First: 2004/02/20]



- 1  
2  
3  
4 52. Celenza A, Bharath J, Scop J. Improving the attractiveness of an emergency medicine career to medical  
5 students: An exploratory study. *Emergency Medicine Australasia* 2012;24(6):625-33. doi:  
6 10.1111/j.1742-6723.2012.01607.x  
7  
8 53. Dolan-Evans E, Rogers GD. Barriers for students pursuing a surgical career and where the Surgical Interest  
9 Association can intervene. *Anz Journal of Surgery* 2014;84(6):406-11. doi: 10.1111/ans.12521  
10  
11 54. Boyd JS, Clyne B, Reinert SE, et al. Emergency Medicine Career Choice: A Profile of Factors and Influences  
12 from the Association of American Medical Colleges (AAMC) Graduation Questionnaires. *Academic*  
13 *Emergency Medicine* 2009;16(6):544-49. doi: 10.1111/j.1553-2712.2009.00385.x  
14  
15 55. Egerton EA. Choice of career of doctors who graduated from Queen's University, Belfast in 1977. *Med Educ*  
16 1985;19(2):131-7.  
17  
18 56. Diderichsen S, Johansson EE, Verdonk P, et al. Few gender differences in specialty preferences and  
19 motivational factors: a cross-sectional Swedish study on last-year medical students. *Bmc Medical*  
20 *Education* 2013;13:8. doi: 10.1186/1472-6920-13-39  
21  
22 57. Ferrari S, Reggianini C, Mattei G, et al. International Study of Student Career Choice in Psychiatry  
23 (ISoSCCiP): Results from Modena, Italy. *International Review of Psychiatry* 2013;25(4):450-59. doi:  
24 10.3109/09540261.2013.804402  
25  
26 58. Freire MDM, Jordao LMR, Ferreira ND, et al. Motivation Towards Career Choice of Brazilian Freshman  
27 Students in a Fifteen-Year Period. *Journal of Dental Education* 2011;75(1):115-21.  
28  
29 59. Buddeberg-Fischer B, Klaghofer R, Abel T, et al. Swiss residents' speciality choices--impact of gender,  
30 personality traits, career motivation and life goals. *BMC Health Serv Res* 2006;6:137. doi:  
31 10.1186/1472-6963-6-137  
32  
33 60. Dorsey ER, Jarjoura D, Rutecki GW. The influence of controllable lifestyle and sex on the specialty choices of  
34 graduating U.S. medical students, 1996-2003. *Academic medicine : journal of the Association of*  
35 *American Medical Colleges* 2005;80(9):791-6. [published Online First: 2005/08/27]  
36  
37 61. Ekenze SO, Ugwumba FO, Obi UM, et al. Undergraduate Surgery Clerkship and the Choice of Surgery as a  
38 Career: Perspective from a Developing Country. *World Journal of Surgery* 2013;37(9):2094-100. doi:  
39 10.1007/s00268-013-2073-y  
40  
41 62. Barikani A, Afaghi M, Barikani F, et al. Perception of the medical students on their future career in Qazvin  
42 University of Medical Sciences. *Global journal of health science* 2012;4(4):176-80. doi:  
43 10.5539/gjhs.v4n4p176 [published Online First: 2012/09/18]  
44  
45 63. Bittaye M, Odukogbe AT, Nyan O, et al. Medical students' choices of specialty in The Gambia: the need for  
46 career counseling. *BMC Med Educ* 2012;12:72. doi: 10.1186/1472-6920-12-72  
47  
48 64. Bonura EM, Lee ES, Ramsey K, et al. Factors Influencing Internal Medicine Resident Choice of Infectious  
49 Diseases or Other Specialties: A National Cross-sectional Study. *Clinical Infectious Diseases*  
50 2016;63(2):155-63. doi: 10.1093/cid/ciw263  
51  
52 65. Al-Fouzan R, Al-Ajlan S, Marwan Y, et al. Factors affecting future specialty choice among medical students in  
53 Kuwait. *Medical Education Online* 2012;17:7. doi: 10.3402/meo.v17i0.19587  
54  
55 66. AlKot MM, Gouda MA, KhalafAllah MT, et al. Family Medicine in Egypt From Medical Students'  
56 Perspective: A Nationwide Survey. *Teaching and Learning in Medicine* 2015;27(3):264-73. doi:  
57 10.1080/10401334.2015.1044654  
58  
59  
60

- 1  
2  
3  
4 67. Borges NJ, Manuel RS, Duffy RD, et al. Influences on specialty choice for students entering person-oriented  
5 and technique-oriented specialties. *Medical Teacher* 2009;31(12):1086-88. doi:  
6 10.3109/01421590903183787  
7  
8 68. Budd S, Kelley R, Day R, et al. Student attitudes to psychiatry and their clinical placements. *Medical Teacher*  
9 2011;33(11):E586-E92. doi: 10.3109/0142159x.2011.610836  
10  
11 69. Corrigan MA, Shields CJ, Redmond HP. Factors influencing surgical career choices and advancement in  
12 Ireland and Britain. *World Journal of Surgery* 2007;31(10):1921-29. doi: 10.1007/s00268-007-9175-3  
13  
14 70. Davis CR, Trevatt AEJ, McGoldrick RB, et al. How to train plastic surgeons of the future. *Journal of Plastic*  
15 *Reconstructive and Aesthetic Surgery* 2016;69(8):1134-40. doi: 10.1016/j.bjps.2016.05.001  
16  
17 71. Deutsch T, Lippmann S, Frese T, et al. Who wants to become a general practitioner? Student and curriculum  
18 factors associated with choosing a GP career - a multivariable analysis with particular consideration of  
19 practice-orientated GP courses. *Scandinavian Journal of Primary Health Care* 2015;33(1):47-53. doi:  
20 10.3109/02813432.2015.1020661  
21  
22 72. Gardner SP, Roberts-Thomson KF. The effect of a change in selection procedures on students' motivation to  
23 study dentistry. *Australian Dental Journal* 2014;59(1):2-8. doi: 10.1111/adj.12141  
24  
25 73. Dias MS, Sussman JS, Durham S, et al. Perceived benefits and barriers to a career in pediatric neurosurgery: a  
26 survey of neurosurgical residents Clinical article. *Journal of Neurosurgery-Pediatrics*  
27 2013;12(5):422-33. doi: 10.3171/2013.5.peds12597  
28  
29 74. Goltz CJ, Bachusz RC, Mancini E, et al. Medical Student Career Survey-Vascular Surgery Awareness  
30 Initiative. *Annals of Vascular Surgery* 2013;27(2):225-31. doi: 10.1016/j.avsg.2012.02.012  
31  
32 75. Gupta NB, Khadilkar SV, Bangar SS, et al. Neurology as career option among postgraduate medical students.  
33 *Annals of Indian Academy of Neurology* 2013;16(4):478-82. doi: 10.4103/0972-2327.120427  
34  
35 76. Hanzlick R, Prahlow JA, Denton S, et al. Selecting forensic pathology as a career - A survey of the post with  
36 an eye on the future. *American Journal of Forensic Medicine and Pathology* 2008;29(2):114-22. doi:  
37 10.1097/PAF.0b013e318174f0a9  
38  
39 77. Harris MC, Marx J, Gallagher PR, et al. General vs subspecialty pediatrics - Factors leading to residents'  
40 career decisions over a 12-year period. *Archives of Pediatrics & Adolescent Medicine*  
41 2005;159(3):212-16. doi: 10.1001/archpedi.159.3.212  
42  
43 78. Hauer KE, Fagan MJ, Kernan W, et al. Internal medicine clerkship directors' perceptions about student interest  
44 in internal medicine careers. *Journal of General Internal Medicine* 2008;23(7):1101-04. doi:  
45 10.1007/s11606-008-0640-y  
46  
47 79. Labiris G, Vamvakerou V, Tsolakaki O, et al. Perceptions of Greek medical students regarding medical  
48 profession and the specialty selection process during the economic crisis years. *Health Policy*  
49 2014;117(2):203-09. doi: 10.1016/j.healthpol.2014.04.009  
50  
51 80. Lambert TW, Goldacre MJ, Bron AJ. Career choices for ophthalmology made by newly qualified doctors in  
52 the United Kingdom, 1974-2005. *Bmc Ophthalmology* 2008;8:9. doi: 10.1186/1471-2415-8-3  
53  
54 81. Shah HH, Jhaveri KD, Sparks MA, et al. Career Choice Selection and Satisfaction among US Adult  
55 Nephrology Fellows. *Clinical Journal of the American Society of Nephrology* 2012;7(9):1513-20. doi:  
56 10.2215/cjn.01620212  
57  
58 82. Lefevre JH, Roupret M, Kerneis S, et al. Career choices of medical students: a national survey of 1780  
59  
60

- students. *Medical Education* 2010;44(6):603-12. doi: 10.1111/j.1365-2923.2010.03707.x
83. Vicente B, Rosel L. Challenges for psychiatric recruitment and training in Chile. *International Review of Psychiatry* 2013;25(4):413-18. doi: 10.3109/09540261.2013.822348
84. Wiesenfeld L, Abbey S, Takahashi SG, et al. Choosing Psychiatry as a Career: Motivators and Deterrents at a Critical Decision-Making Juncture. *Canadian Journal of Psychiatry-Revue Canadienne De Psychiatrie* 2014;59(8):450-54.
85. Lam CYY, Cheung CSY, Hui ASY. Factors influencing the career interest of medical graduates in obstetrics and gynaecology in Hong Kong: a cross-sectional questionnaire survey. *Hong Kong Medical Journal* 2016;22(2):138-43.
86. Hartung PJ, Taber BJ, Richard GV. The physician values in practice scale: Construction and initial validation. *Journal of Vocational Behavior* 2005;67(2):309-20. doi: 10.1016/j.jvb.2004.05.008
87. Girasek E, Molnar R, Eke E, et al. The medical career choice motivations - Results from a Hungarian study. *Central European Journal of Medicine* 2011;6(4):502-09. doi: 10.2478/s11536-011-0034-0
88. Zuccato JA, Kulkarni AV. The Impact of Early Medical School Surgical Exposure on Interest in Neurosurgery. *Canadian Journal of Neurological Sciences* 2016;43(3):410-16. doi: 10.1017/cjn.2015.332
89. Wilbanks L, Spollen J, Messias E. Factors Influencing Medical School Graduates Toward a Career in Psychiatry: Analysis from the 2011-2013 Association of American Medical Colleges Graduation Questionnaire. *Academic Psychiatry* 2016;40(2):255-60. doi: 10.1007/s40596-015-0287-z
90. West CP, Drefahl MM, Popkave C, et al. Internal Medicine Resident Self-report of Factors Associated with Career Decisions. *Journal of General Internal Medicine* 2009;24(8):946-49. doi: 10.1007/s11606-009-1039-0
91. Watmough S, Taylor D, Ryland I. Using questionnaires to determine whether medical graduates' career choice is determined by undergraduate or postgraduate experiences. *Medical Teacher* 2007;29(8):830-32. doi: 10.1080/01421590701551755
92. Thakur A, Fedorka P, Ko C, et al. Impact of mentor guidance in surgical career selection. *Journal of Pediatric Surgery* 2001;36(12):1802-04. doi: 10.1053/jpsu.2001.28842
93. Scott I, Gowans M, Wright B, et al. Determinants of choosing a career in surgery. *Medical Teacher* 2011;33(12):1011-17. doi: 10.3109/0142159x.2011.558533
94. Schnuth RL, Vasilenko P, Mavis B, et al. What influences medical students to pursue careers in obstetrics and gynecology? *American Journal of Obstetrics and Gynecology* 2003;189(3):639-43. doi: 10.1067/s0002-9378(03)00886-x
95. Richards JMJ, Drummond R, Murray J, et al. WHAT PROPORTION OF BASIC SURGICAL TRAINEES CONTINUE IN A SURGICAL CAREER? A SURVEY OF THE FACTORS WHICH ARE IMPORTANT IN INFLUENCING CAREER DECISIONS. *Surgeon-Journal of the Royal Colleges of Surgeons of Edinburgh and Ireland* 2009;7(5):270-75.
96. Reed CE, Vaporciyan AA, Erikson C, et al. Factors Dominating Choice of Surgical Specialty. *Journal of the American College of Surgeons* 2010;210(3):319-24. doi: 10.1016/j.jamcollsurg.2009.11.016
97. de Souza LCL, Mendonca VRR, Garcia GBC, et al. Medical Specialty Choice and Related Factors of Brazilian Medical Students and Recent Doctors. *Plos One* 2015;10(7):15. doi: 10.1371/journal.pone.0133585

- 1  
2  
3  
4 98. Pikoulis E, Avgerinos ED, Pedeli X, et al. Medical students' perceptions on factors influencing a surgical  
5 career: The fate of general surgery in Greece. *Surgery* 2010;148(3):510-15. doi:  
6 10.1016/j.surg.2010.01.013  
7
- 8 99. Ozer U, Ceri V, Carpar E, et al. Factors Affecting the Choice of Psychiatry as a Specialty and Satisfaction  
9 among Turkish Psychiatry Residents. *Academic Psychiatry* 2016;40(2):299-303. doi:  
10 10.1007/s40596-015-0346-5  
11
- 12 100. Noble J, Hechter FJ, Karaikos N, et al. Motivational factors and future life plans of orthodontic residents in  
13 the United States. *American Journal of Orthodontics and Dentofacial Orthopedics* 2010;137(5):623-30.  
14 doi: 10.1016/j.ajodo.2008.03.034  
15
- 16 101. Noble J. Factors influencing career choice in ophthalmology. *Canadian Journal of Ophthalmology-Journal*  
17 *Canadien D Ophtalmologie* 2006;41(5):596-99.  
18
- 19 102. Newton DA, Grayson MS, Thompson LF. The variable influence of lifestyle and income on medical students'  
20 career specialty choices: Data from two US medical schools, 1998-2004. *Academic Medicine*  
21 2005;80(9):809-14. doi: 10.1097/00001888-200509000-00005  
22
- 23 103. Moore HB, Moore PK, Grant AR, et al. Future of acute care surgery: A perspective from the next generation.  
24 *Journal of Trauma and Acute Care Surgery* 2012;72(1):94-99. doi: 10.1097/TA.0b013e31823b990a  
25
- 26 104. Momen AA, Shakurnia A. Factors Influencing Pediatric Specialty Choice among Pediatric Residents of  
27 Ahvaz Jundishapur University of Medical Sciences. *International Journal of Pediatrics-Mashhad*  
28 2015;3(3):701-06.  
29
- 30 105. Mehmood SI, Kumar A, Al-Binali A, et al. Specialty preferences: Trends and perceptions among Saudi  
31 undergraduate medical students. *Medical Teacher* 2012;34:S51-S60. doi:  
32 10.3109/0142159x.2012.656753  
33
- 34 106. Lorient Y, Albiges-Sauvin L, Dionysopoulos D, et al. Why do residents choose the medical oncology specialty?  
35 Implications for future recruitment-results of the 2007 French Association of Residents in Oncology  
36 (AERIO) Survey. *Annals of Oncology* 2010;21(1):161-65. doi: 10.1093/annonc/mdp294  
37
- 38 107. Lefevre JH, Karila L, Kerneis S, et al. Motivation of French medical students to pursue surgical careers:  
39 Results of national survey of 1742 students. *Journal of Visceral Surgery* 2010;147(3):E181-E86. doi:  
40 10.1016/j.jviscsurg.2010.08.004  
41  
42  
43  
44  
45  
46  
47  
48  
49  
50  
51  
52  
53

## Legends

**Table 1. Selected Characteristics of the 76 Studies Included in this Systematic Review and Meta-analysis**

**Table 2. Meta-analyses of the Factors Influencing Medical Students' Choice of Subspecialty**

**Table 3. Meta-regression of the EOI Value Stratified by Study-level Characteristics**

**Figure 1. Bar Graph of the Meta-analyses of the Factors Influencing Medical Students' Choice of Subspecialty Stratified by Region.**

**Figure 2. Bar Graph of the Meta-analyses of the Factors Influencing Medical Students' Choice of Subspecialty Stratified by Survey Year.**

## Supplements

**Methods S1. Search strategy used in the current systematic review and meta-analysis.**

**Table S1. Quality Assessment of the Included Studies.**

**Table S2. Meta-analyses of the Factors Influencing Medical Students' Choice of Subspecialty Stratified by Region and Survey Year.**

**Figure S1. Flow Diagram of the Study Inclusion Process.**

**Figure S2. Forest Plot of "Academic Interest".**

1  
2  
3  
4 **Figure S3. Forest Plot of “Competencies”.**  
5

6  
7 **Figure S4. Forest Plot of “Controllable Lifestyle or Flexible Work Schedule”.**  
8

9  
10 **Figure S5. Forest Plot of “Patient Service Orientation”.**  
11

12  
13 **Figure S6. Forest Plot of “Medical Teachers or Mentors”.**  
14

15  
16 **Figure S7. Forest Plot of “Career Opportunities”.**  
17

18  
19 **Figure S8. Forest Plot of “Workload or Working Hours”.**  
20

21  
22 **Figure S9. Forest Plot of “Income”.**  
23

24  
25 **Figure S10. Forest Plot of “Length of Training”.**  
26

27  
28 **Figure S11. Forest Plot of “Prestige”.**  
29

30  
31 **Figure S12. Forest Plot of “Advice from Others”.**  
32

33  
34 **Figure S13. Forest Plot of “Student Debt”.**  
35

36  
37 **Figure S14. Funnel Plots of the Publication Bias Tests of the 12 Factors.**  
38

**Table 1. Selected Characteristics of the 76 Studies Included in this Systematic Review and Meta-analysis**

| First Author, Year                          | Country     | Survey years | Sample size | Average age | Men, No. (%)  | Scores |
|---------------------------------------------|-------------|--------------|-------------|-------------|---------------|--------|
| Smith et al, <sup>38</sup> 2015             | UK          | 2012         | 2,978       | NR          | NR            | 6      |
| Cochran et al, <sup>39</sup> 2005           | USA         | 2002         | 408         | 27.2        | 214 (52.45)   | 5      |
| Hauer et al, <sup>40</sup> 2008             | USA         | 2007         | 1,177       | NR          | NR            | 6      |
| Johnson et al, <sup>41</sup> 2012           | USA         | 2012         | 622         | NR          | NR            | 6      |
| Kiolbassa et al, <sup>42</sup> 2011         | Germany     | 2010         | 1,114       | 24.1        | 408 (36.62)   | 5      |
| Klingensmith et al, <sup>43</sup> 2015      | USA         | 2013         | 792         | NR          | 539 (68.06)   | 6      |
| Lee et al, <sup>44</sup> 2012               | USA         | 2012         | 100         | NR          | 58 (58)       | 7      |
| Macdonald et al, <sup>45</sup> 2012         | New Zealand | 2011         | 134         | NR          | 79 (58.96)    | 7      |
| Parsa et al, <sup>34</sup> 2010             | Iran        | 2006-2007    | 137         | 27.34       | 49 (35.77)    | 7      |
| Paiva et al, <sup>46</sup> 1982             | USA         | 1982         | 144         | NR          | NR            | 6      |
| Ni Chroinin et al, <sup>47</sup> 2013       | UK          | 2009-2011    | 274         | NR          | 112 (40.89)   | 7      |
| Newton et al, <sup>29</sup> 2005            | USA         | 1998-2004    | 1,258       | NR          | 642 (51.03)   | 8      |
| Rogers et al, <sup>48</sup> 1990            | USA         | 1989         | 266         | NR          | 205 (77.07)   | 6      |
| Abendroth J et al, <sup>49</sup> 2014       | Germany     | 2007-2012    | 45          | NR          | 14 (31)       | 7      |
| Alawad et al, <sup>50</sup> 2015            | USA         | 2010-2011    | 45          | NR          | 36 (80)       | 8      |
| Azizzadeh et al, <sup>51</sup> 2003         | USA         | 2002         | 130         | NR          | NR            | 6      |
| Celenza et al, <sup>52</sup> 2012           | Australia   | 2009         | 216         | NR          | 121 (56.02)   | 8      |
| Dolan-Evans et al, <sup>53</sup> 2014       | Australia   | 2013         | 419         | NR          | 215 (51.31)   | 8      |
| Boyd et al, <sup>54</sup> 2009              | USA         | 2005-2006    | 5,848       | NR          | 2,982 (50.99) | 8      |
| Egerton et al, <sup>55</sup> 1985           | Ireland     | 1977-1981    | 134         | 30          | 82 (61.19)    | 6      |
| Diderichsen et al, <sup>56</sup> 2013       | Sweden      | 2006-2009    | 372         | 27          | 157 (42.20)   | 6      |
| Ferrari et al, <sup>57</sup> 2013           | Italy, UK   | 2009-2011    | 45          | 25          | NR            | 9      |
| Freire et al, <sup>58</sup> 2011            | Brazil      | 2006-2008    | 290         | 23          | 102 (35.17)   | 7      |
| Buddeberg-Fischer et al, <sup>59</sup> 2006 | Switzerland | 2001-2003    | 522         | 31.1        | 241 (46.17)   | 9      |
| Dorsey et al, <sup>60</sup> 2005            | USA         | 2003         | 11,029      | NR          | 4,964 (45.01) | 6      |
| Ekenze et al, <sup>61</sup> 2013            | Nigeria     | 2009-2010    | 96          | 25.9        | NR            | 7      |
| Barikani et al, <sup>62</sup> 2012          | Australia   | 2008-2009    | 49          | 21.7        | NR            | 6      |
| Bittaye et al, <sup>63</sup> 2012           | Gambia      | 2011         | 106         | 24.1        | 48 (45.28)    | 6      |
| Bonura et al, <sup>64</sup> 2016            | USA         | 2015         | 590         | NR          | 321 (54.40)   | 9      |
| Al-Fouzan et al, <sup>65</sup> 2012         | Kuwait      | 2011-2012    | 144         | NR          | NR            | 7      |
| AlKot et al, <sup>66</sup> 2015             | Egypt       | 2013         | 451         | 21.8        | NR            | 7      |
| Borges et al, <sup>67</sup> 2009            | USA         | 2001-2005    | 341         | NR          | NR            | 5      |
| Budd et al, <sup>68</sup> 2011              | UK          | 2011         | 870         | 22          | NR            | 7      |
| Corrigan et al, <sup>69</sup> 2007          | Ireland     | 2007         | 222         | NR          | 142 (63.96)   | 7      |
| Davis et al, <sup>70</sup> 2016             | UK          | 2016         | 173         | NR          | 76 (43.93)    | 7      |

|    |                                      |              |           |        |       |                |   |
|----|--------------------------------------|--------------|-----------|--------|-------|----------------|---|
| 1  |                                      |              |           |        |       |                |   |
| 2  |                                      |              |           |        |       |                |   |
| 3  |                                      |              |           |        |       |                |   |
| 4  | Deutsch et al, <sup>71</sup> 2015    | Germany      | 2011      | 659    | 27.9  | NR             | 8 |
| 5  | Gardner et al, <sup>72</sup> 2014    | Australia    | 1993-2005 | 631    | NR    | NR             | 7 |
| 6  | Dias et al, <sup>73</sup> 2013       | UK           | 2013      | 495    | NR    | 438 (88.48)    | 5 |
| 7  | Goltz et al, <sup>74</sup> 2013      | USA          | 2012      | 102    | 24.5  | 34 (33.33)     | 6 |
| 8  | Gupta et al, <sup>75</sup> 2013      | India        | 2013      | 243    | NR    | 179 (73.36)    | 6 |
| 9  | Hanzlick et al, <sup>76</sup> 2008   | USA          | 2006      | 161    | NR    | NR             | 6 |
| 10 | Harris et al, <sup>77</sup> 2005     | USA          | 1991-2002 | 104    | NR    | 53 (50.96)     | 6 |
| 11 | Hauer et al, <sup>78</sup> 2008      | USA          | 2008      | 80     | NR    | NR             | 6 |
| 12 | Labiris et al, <sup>79</sup> 2014    | Greece       | 2014      | 111    | 23.6  | 55 (49.54)     | 6 |
| 13 | Lambert et al, <sup>80</sup> 2008    | UK           | 2007      | 17,393 | NR    | NR             | 6 |
| 14 | Shah et al, <sup>81</sup> 2012       | USA          | 2011      | 892    | NR    | NR             | 6 |
| 15 | Lefevre et al, <sup>82</sup> 2010    | USA          | 2008      | 1,555  | NR    | 589 (37.88)    | 6 |
| 16 | Vicente et al, <sup>83</sup> 2013    | Chile        | 2013      | 30     | NR    | NR             | 6 |
| 17 | Wiesenfeld et al, <sup>84</sup> 2014 | Canada       | 2013      | 60     | NR    | NR             | 7 |
| 18 | Lam et al, <sup>85</sup> 2016        | Hong Kong    | 2015      | 228    | 23    | NR             | 9 |
| 19 | Hartung et al, <sup>86</sup> 2005    | USA          | 2004      | 192    | 20.59 | 74 (38.54)     | 4 |
| 20 | Girasek et al, <sup>87</sup> 2011    | Hungary      | 2011      | 536    | NR    | NR             | 5 |
| 21 | Zuccato et al, <sup>88</sup> 2015    | Canada       | 2012      | 37     | NR    | 24 (65)        | 6 |
| 22 | Wilbanks et al, <sup>89</sup> 2015   | USA          | 2011-2013 | 29,227 | NR    | 15,164 (51.99) | 9 |
| 23 | West et al, <sup>90</sup> 2009       | USA          | 2005-2007 | 14,890 | NR    | 8,700 (58.43)  | 6 |
| 24 | Watmough et al, <sup>91</sup> 2007   | UK           | 2005      | 116    | NR    | 66 (56.90)     | 4 |
| 25 | Thakur et al, <sup>92</sup> 2001     | USA          | 2001      | 56     | NR    | 53 (95)        | 8 |
| 26 | Scott et al, <sup>93</sup> 2011      | Canada       | 2002-2004 | 1,542  | NR    | NR             | 6 |
| 27 | Schnuth et al, <sup>94</sup> 2003    | USA          | 2002      | 203    | NR    | 72 (53.47)     | 6 |
| 28 | Richards et al, <sup>95</sup> 2009   | UK           | 2009      | 150    | NR    | 108 (72.00)    | 5 |
| 29 | Reed et al, <sup>96</sup> 2009       | USA          | 2008      | 2,022  | NR    | 1,354 (66.96)  | 9 |
| 30 | de Souza et al, <sup>97</sup> 2015   | Portugal     | 2012      | 1,303  | NR    | NR             | 7 |
| 31 | Pikoulis et al, <sup>98</sup> 2010   | Greece       | 2006-2007 | 87     | NR    | NR             | 6 |
| 32 | Ozer et al, <sup>99</sup> 2015       | Turkey       | 2013      | 98     | 27.7  | 26 (26.53)     | 6 |
| 33 | Noble et al, <sup>100</sup> 2004     | Canada       | 2004      | 21,296 | NR    | NR             | 8 |
| 34 | Noble et al, <sup>101</sup> 2010     | Canada       | 2007      | 120    | NR    | NR             | 5 |
| 35 | Newton et al, <sup>102</sup> 2005    | USA          | 2004      | 1,286  | NR    | NR             | 6 |
| 36 | Moore et al, <sup>103</sup> 2012     | USA          | 2011      | 337    | 26    | 179 (53.12)    | 6 |
| 37 | Momen et al, <sup>104</sup> 2015     | Iran         | 2014-2015 | 38     | 35.6  | 11 (29)        | 6 |
| 38 | Mehmood et al, <sup>105</sup> 2012   | Saudi Arabia | 2012      | 550    | NR    | 348 (63.27)    | 6 |
| 39 | Loriot et al, <sup>106</sup> 2010    | France       | 2007      | 44     | NR    | 17 (39)        | 7 |
| 40 | Lefevre et al, <sup>107</sup> 2010   | France       | 2008      | 522    | 23.8  | 198 (37.93)    | 7 |
| 41 |                                      |              |           |        |       |                |   |
| 42 |                                      |              |           |        |       |                |   |
| 43 |                                      |              |           |        |       |                |   |
| 44 |                                      |              |           |        |       |                |   |
| 45 |                                      |              |           |        |       |                |   |
| 46 |                                      |              |           |        |       |                |   |
| 47 |                                      |              |           |        |       |                |   |
| 48 |                                      |              |           |        |       |                |   |
| 49 |                                      |              |           |        |       |                |   |
| 50 |                                      |              |           |        |       |                |   |
| 51 |                                      |              |           |        |       |                |   |
| 52 |                                      |              |           |        |       |                |   |
| 53 |                                      |              |           |        |       |                |   |
| 54 |                                      |              |           |        |       |                |   |
| 55 |                                      |              |           |        |       |                |   |
| 56 |                                      |              |           |        |       |                |   |
| 57 |                                      |              |           |        |       |                |   |
| 58 |                                      |              |           |        |       |                |   |
| 59 |                                      |              |           |        |       |                |   |
| 60 |                                      |              |           |        |       |                |   |



**Table 2. Meta-analyses of the Factors Influencing Medical Students' Choice of Subspecialty**

| Factor                                           | No. of studies | Total no. of participants | EOI (%) | value | <i>I-square</i> (%) | <i>Tau-square</i> | <i>P-Value</i> |
|--------------------------------------------------|----------------|---------------------------|---------|-------|---------------------|-------------------|----------------|
| Academic interests                               | 37             | 82,276                    | 74.87   |       | 99.80               | 1.60              | <0.0001        |
| Competencies                                     | 17             | 76,515                    | 55.15   |       | 99.90               | 3.44              | <0.0001        |
| Controllable lifestyle or flexible work schedule | 42             | 102,384                   | 53.06   |       | 99.50               | 0.45              | <0.0001        |
| Patient service orientation                      | 34             | 45,865                    | 49.35   |       | 98.70               | 0.41              | <0.0001        |
| Medical teachers or mentors                      | 32             | 85,071                    | 46.93   |       | 99.80               | 1.14              | <0.0001        |
| Career opportunities                             | 38             | 81,923                    | 44.00   |       | 99.70               | 1.15              | <0.0001        |
| Workload or working hours                        | 19             | 21,870                    | 37.92   |       | 98.40               | 0.72              | <0.0001        |
| Income                                           | 49             | 109,610                   | 35.25   |       | 99.70               | 1.09              | <0.0001        |
| Length of training                               | 18             | 42,046                    | 32.30   |       | 98.10               | 0.20              | <0.0001        |
| Prestige                                         | 24             | 30,012                    | 31.29   |       | 98.40               | 0.53              | <0.0001        |
| Advice from others                               | 18             | 82,692                    | 28.24   |       | 99.80               | 0.02              | <0.0001        |
| Student debt                                     | 8              | 38,917                    | 15.33   |       | 98.80               | 0.27              | <0.0001        |

**Table 3. Meta-regression of the EOI Value Stratified by Study-level Characteristics**

| Factor                                           |              | P-Value |
|--------------------------------------------------|--------------|---------|
| Academic interests                               | Country      | 0.6302  |
|                                                  | Survey years | 0.2711  |
|                                                  | Specialty    | 0.4008  |
|                                                  | Sample size  | 0.6537  |
| Competencies                                     | Country      | 0.8376  |
|                                                  | Survey years | 0.0151  |
|                                                  | Specialty    | 0.9398  |
|                                                  | Sample size  | 0.5823  |
| Controllable lifestyle or flexible work schedule | Country      | 0.9614  |
|                                                  | Survey years | 0.9822  |
|                                                  | Specialty    | 0.0035  |
|                                                  | Sample size  | 0.7203  |
| Patient service orientation                      | Country      | 0.0833  |
|                                                  | Survey years | 0.8524  |
|                                                  | Specialty    | 0.0010  |
|                                                  | Sample size  | 0.6358  |
| Medical teachers or mentors                      | Country      | 0.0007  |
|                                                  | Survey years | 0.6376  |
|                                                  | Specialty    | 0.8141  |
|                                                  | Sample size  | 0.5894  |
| Career opportunities                             | Country      | 0.5828  |
|                                                  | Survey years | 0.7546  |
|                                                  | Specialty    | 0.0077  |
|                                                  | Sample size  | 0.0081  |
| Workload or working hours                        | Country      | 0.3981  |
|                                                  | Survey years | 0.3922  |
|                                                  | Specialty    | 0.1070  |
|                                                  | Sample size  | 0.8205  |
| Income                                           | Country      | 0.7390  |
|                                                  | Survey years | 0.8774  |
|                                                  | Specialty    | 0.0480  |
|                                                  | Sample size  | 0.6786  |
| Length of training                               | Country      | 0.7854  |
|                                                  | Survey years | 0.7229  |
|                                                  | Specialty    | 0.5667  |
| Prestige                                         | Sample size  | 0.7082  |
|                                                  | Country      | 0.3485  |

1  
2  
3  
4  
5  
6  
7  
8  
9  
10  
11  
12  
13  
14  
15  
16  
17  
18  
19  
20  
21  
22  
23  
24  
25  
26  
27  
28  
29  
30  
31  
32  
33  
34  
35  
36  
37  
38  
39  
40  
41  
42  
43  
44  
45  
46  
47  
48  
49  
50  
51  
52  
53  
54  
55  
56  
57  
58  
59  
60

|                    |                 |         |
|--------------------|-----------------|---------|
|                    | Survey years    | 0.0950  |
|                    | Specialty       | 0.0172  |
|                    | Sample size     | 0.5214  |
|                    | Country         | 0.9328  |
| Advice from others | Survey years    | 0.0057  |
|                    | Specialty       | <0.0001 |
|                    | Sample size<200 | <0.0001 |
|                    | Country         | 0.0001  |
| Student debt       | Survey years    | 0.5502  |
|                    | Sample size     | 0.0343  |

---

For peer review only

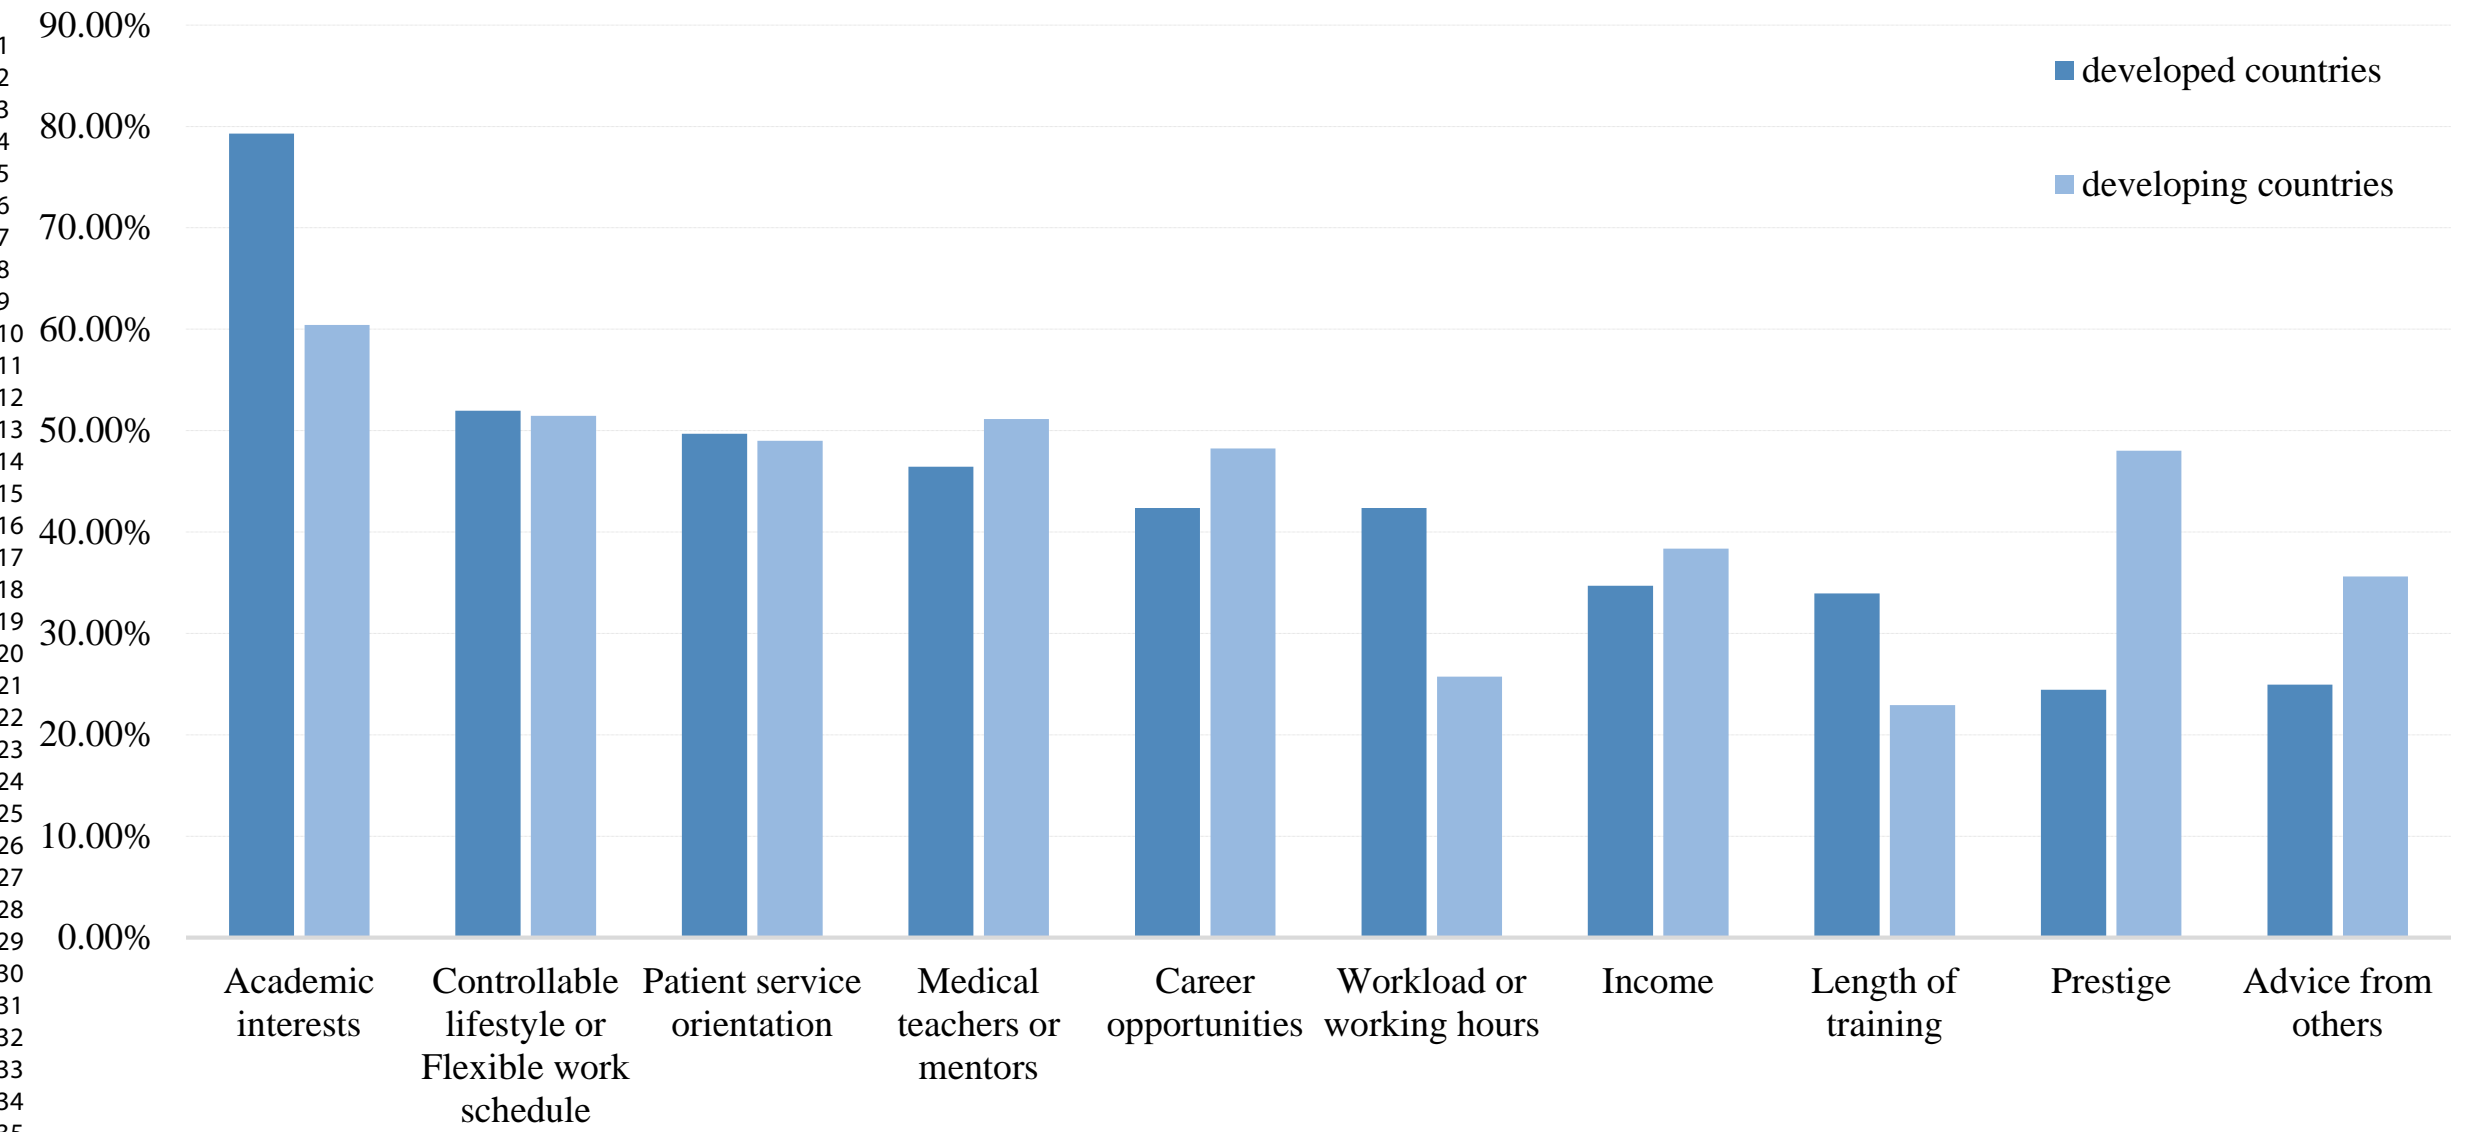

1  
2  
3  
4  
5  
6  
7  
8  
9  
10  
11  
12  
13  
14  
15  
16  
17  
18  
19  
20  
21  
22  
23  
24  
25  
26  
27  
28  
29  
30  
31  
32  
33  
34  
35  
36  
37  
38  
39  
40  
41

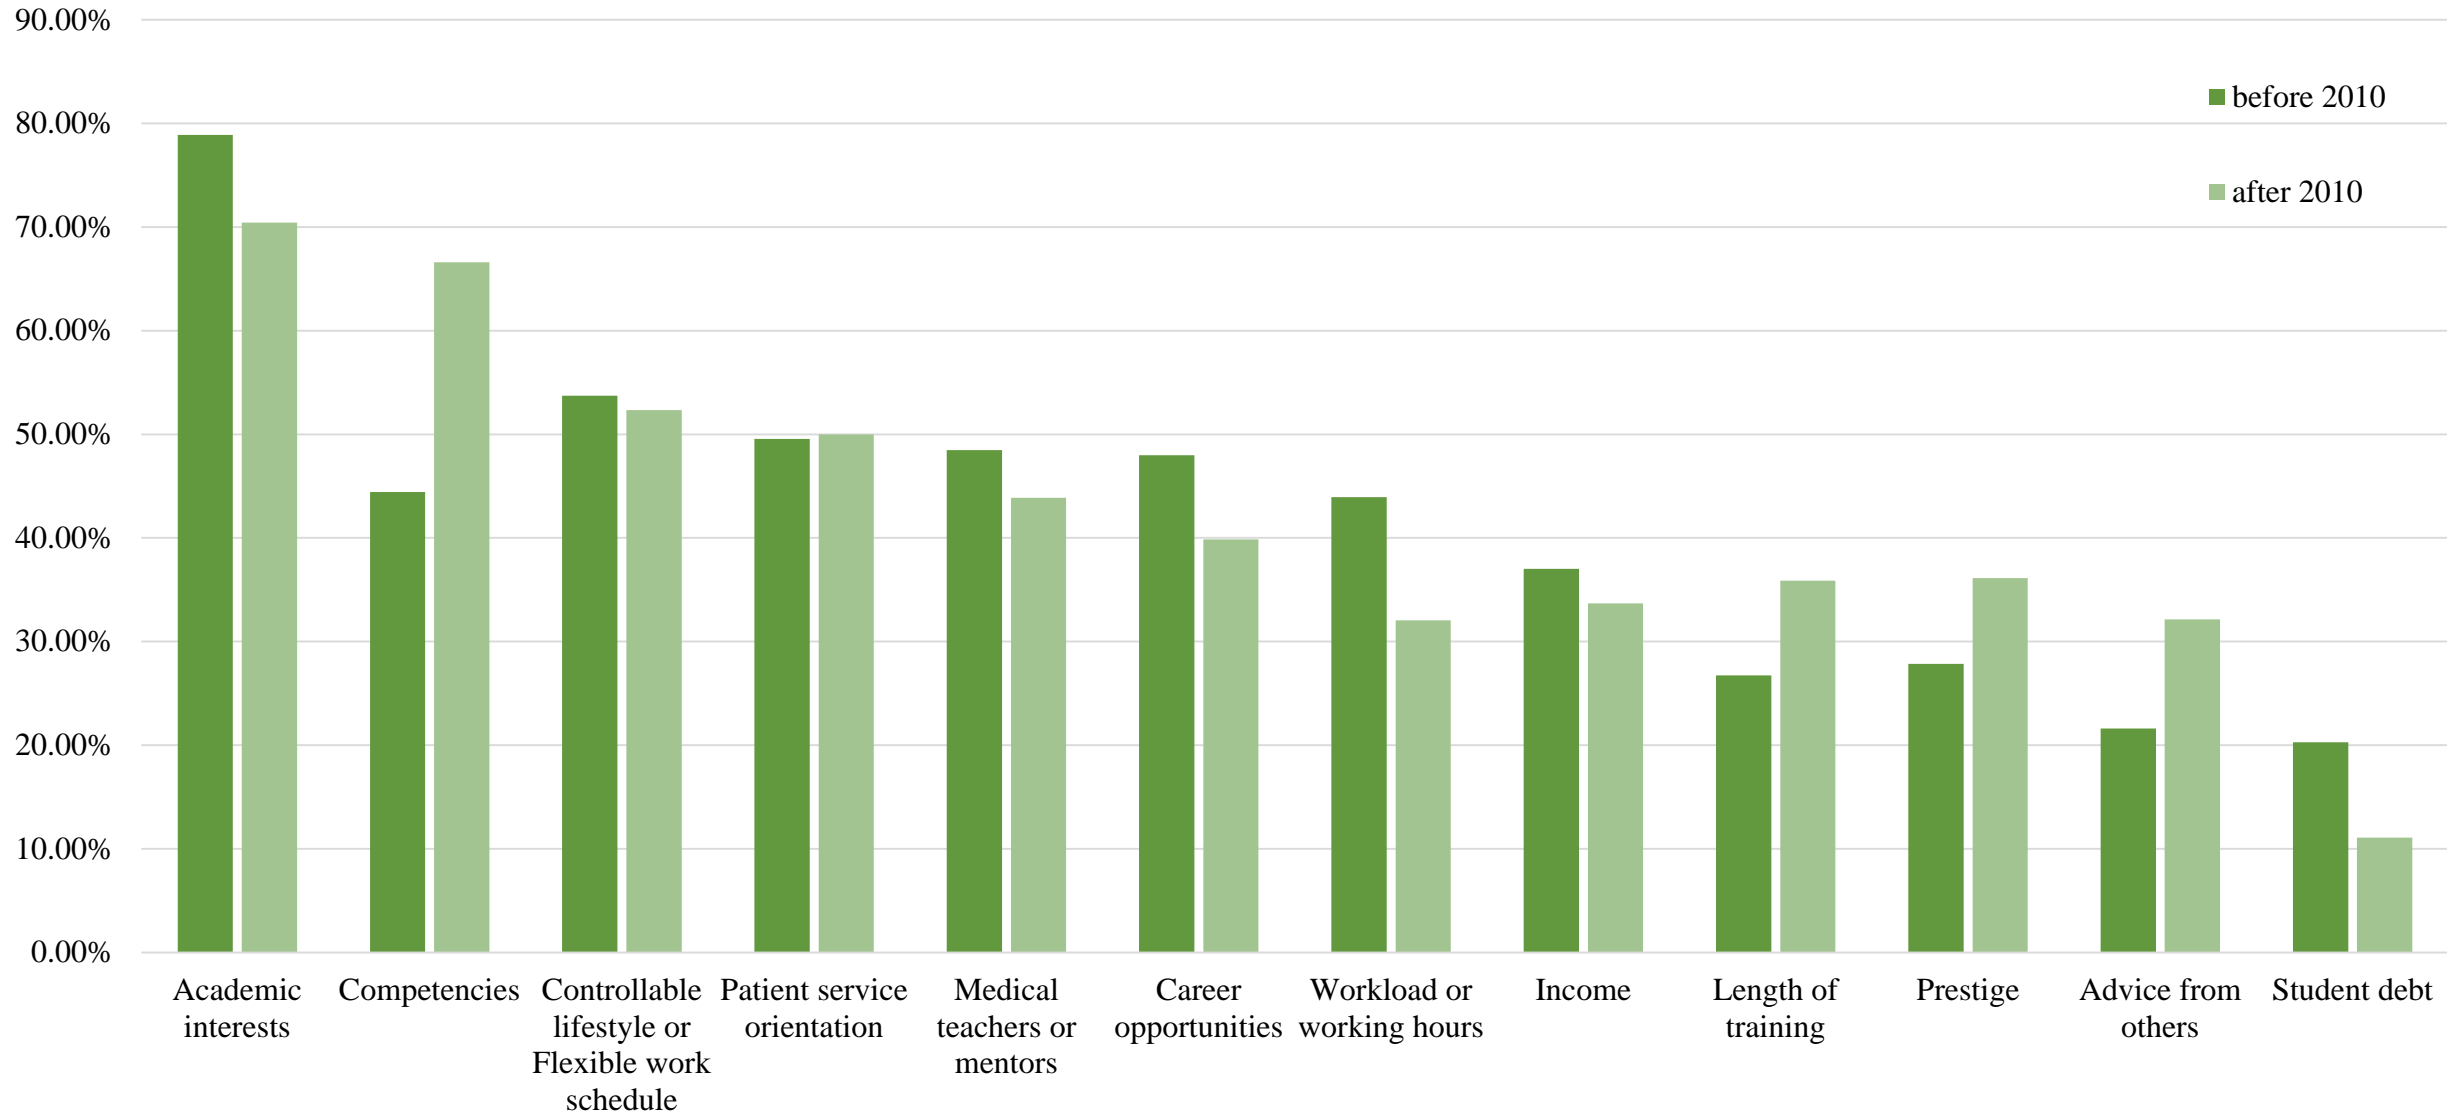

1  
2  
3  
4  
5  
6  
7  
8  
9  
10  
11  
12  
13  
14  
15  
16  
17  
18  
19  
20  
21  
22  
23  
24  
25  
26  
27  
28  
29  
30  
31  
32  
33  
34  
35  
36  
37  
38  
39  
40  
41

1  
2  
3  
4 **SI Methods. Search strategy used in the current systematic review and**  
5  
6 **meta-analysis.**  
7  
8  
9

10  
11 ***Medical Students***

12  
13  
14 1. Students, Medical [Mesh]

15  
16 2. Medical students

17  
18 3. Medical student

19  
20 4. Student, Medical

21  
22 5. OR / 1 – 4

14. Cross sectional study [Publication  
Type]

15. Cross sectional study [Mesh Terms]

16. Systematic review

17. Systematic review [Publication

Type]

18. Systematic review [Mesh Terms]

23  
24  
25  
26  
27  
28  
29  
30 ***Subspecialty Choice***

31  
32 6. Career choices

33  
34 7. Choice, Career

35  
36 8. Choices career

37  
38 9. Specialties

39  
40 10. Sub-specialties

41  
42 11. Sub-discipline

43  
44 12. OR / 6 – 11

19. Meta-analysis [Title/Abstract]

20. Meta-analysis [Mesh Terms]

21. Meta-analysis [Publication Type]

22. OR / 12 – 21

45  
46  
47  
48  
49  
50  
51  
52  
53 ***Factors***

23. Factors

54  
55  
56  
57  
58  
59  
60 ***Combined search***

53 ***Study design***

13. Cross sectional study

24. #5 AND #12AND #22 AND #23

**Abbreviations:** MeSH, Medical Subject Heading in Pubmed.

**Table S1. Quality assessment of the included studies**

| Quality assessment criteria                    | 1 | 2 | 3 | 4 | 5 | 6 | 7 | 8 | 9 | 10 | 11 | Scores |
|------------------------------------------------|---|---|---|---|---|---|---|---|---|----|----|--------|
| 1 Smith et al, <sup>38</sup> 2015              | Y | U | Y | Y | N | Y | N | Y | N | Y  | N  | 6      |
| 2 Cochran et al, <sup>39</sup> 2005            | Y | U | Y | Y | N | Y | N | Y | N | N  | N  | 5      |
| 3 Hauer et al, <sup>40</sup> 2008              | Y | U | Y | Y | N | Y | N | Y | N | Y  | N  | 6      |
| 4 Johnson et al, <sup>41</sup> 2012            | Y | U | Y | Y | N | Y | N | Y | N | Y  | N  | 6      |
| 5 Kiobassa et al, <sup>42</sup> 2011           | Y | U | Y | Y | N | Y | N | Y | N | N  | N  | 5      |
| 6 Klingensmith et al, <sup>43</sup> 2015       | Y | U | Y | Y | N | Y | N | Y | N | Y  | N  | 6      |
| 7 Lee et al, <sup>44</sup> 2012                | Y | U | Y | Y | Y | Y | N | Y | N | Y  | N  | 7      |
| 8 Macdonald et al, <sup>45</sup> 2012          | Y | U | Y | Y | Y | Y | N | Y | N | Y  | N  | 7      |
| 9 Parsa et al, <sup>34</sup> 2010              | Y | U | Y | Y | Y | Y | N | Y | N | Y  | N  | 7      |
| 10 Paiva et al, <sup>46</sup> 1982             | Y | U | Y | Y | N | Y | N | Y | N | Y  | N  | 6      |
| 11 Ni Chroinin et al, <sup>47</sup> 2013       | Y | U | Y | Y | Y | Y | N | Y | N | Y  | N  | 7      |
| 12 Newton et al, <sup>29</sup> 2005            | Y | U | Y | Y | Y | Y | Y | Y | N | Y  | N  | 8      |
| 13 Rogers et al, <sup>48</sup> 1990            | Y | U | Y | Y | N | Y | N | Y | N | Y  | N  | 6      |
| 14 Abendroth J et al, <sup>49</sup> 2014       | Y | U | Y | Y | N | Y | N | Y | N | Y  | Y  | 7      |
| 15 Alawad et al, <sup>50</sup> 2015            | Y | U | Y | Y | N | Y | Y | Y | Y | Y  | N  | 8      |
| 16 Azizzadeh et al, <sup>51</sup> 2003         | Y | U | Y | Y | Y | Y | N | N | N | Y  | N  | 6      |
| 17 Celenza et al, <sup>52</sup> 2012           | Y | U | Y | Y | Y | Y | Y | N | Y | Y  | N  | 8      |
| 18 Dolan-Evans et al, <sup>53</sup> 2014       | Y | U | Y | Y | Y | Y | N | Y | N | Y  | Y  | 8      |
| 19 Boyd et al, <sup>54</sup> 2009              | Y | U | Y | Y | Y | Y | Y | Y | N | Y  | N  | 8      |
| 20 Egerton et al, <sup>55</sup> 1985           | Y | U | Y | Y | N | Y | N | Y | N | Y  | N  | 6      |
| 21 Diderichsen et al, <sup>56</sup> 2013       | Y | U | Y | Y | N | Y | N | Y | N | Y  | N  | 6      |
| 22 Ferrari et al, <sup>57</sup> 2013           | Y | U | Y | Y | Y | Y | Y | Y | Y | Y  | N  | 9      |
| 23 Freire et al, <sup>58</sup> 2011            | Y | U | Y | Y | Y | Y | N | Y | N | Y  | N  | 7      |
| 24 Buddeberg-Fischer et al, <sup>59</sup> 2006 | Y | U | Y | Y | N | Y | Y | Y | Y | Y  | Y  | 9      |
| 25 Dorsey et al, <sup>60</sup> 2005            | Y | U | Y | Y | N | Y | N | Y | N | Y  | N  | 6      |
| 26 Ekenze et al, <sup>61</sup> 2013            | Y | U | Y | Y | Y | Y | Y | N | N | Y  | N  | 7      |
| 27 Barikani et al, <sup>62</sup> 2012          | Y | U | Y | Y | N | Y | N | Y | N | Y  | N  | 6      |
| 28 Bittaye et al, <sup>63</sup> 2012           | Y | U | Y | Y | N | Y | N | Y | N | Y  | N  | 6      |
| 29 Bonura et al, <sup>64</sup> 2016            | Y | U | Y | Y | Y | Y | Y | Y | Y | Y  | N  | 9      |
| 30 Al-Fouzan et al, <sup>65</sup> 2012         | Y | U | Y | Y | Y | Y | N | Y | N | Y  | N  | 7      |
| 31 AlKot et al, <sup>66</sup> 2015             | Y | U | Y | Y | Y | Y | N | Y | N | Y  | N  | 7      |
| 32 Borges et al, <sup>67</sup> 2009            | Y | U | Y | Y | N | Y | N | N | N | Y  | N  | 5      |
| 33 Budd et al, <sup>68</sup> 2011              | Y | U | Y | Y | Y | Y | N | Y | N | Y  | N  | 7      |
| 34 Corrigan et al, <sup>69</sup> 2007          | Y | U | Y | Y | Y | Y | N | Y | N | Y  | N  | 7      |
| 35 Davis et al, <sup>70</sup> 2016             | Y | U | Y | Y | Y | Y | N | Y | N | Y  | N  | 7      |
| 36 Deutsch et al, <sup>71</sup> 2015           | Y | U | Y | Y | Y | Y | N | Y | Y | Y  | N  | 8      |
| 37 Gardner et al, <sup>72</sup> 2014           | Y | U | Y | Y | N | Y | N | Y | N | Y  | N  | 7      |
| 38 Dias et al, <sup>73</sup> 2013              | Y | U | Y | Y | N | Y | N | N | N | Y  | N  | 5      |
| 39 Goltz et al, <sup>74</sup> 2013             | Y | U | Y | Y | N | Y | N | Y | N | Y  | N  | 6      |
| 40 Gupta et al, <sup>75</sup> 2013             | Y | U | Y | Y | N | Y | N | Y | N | Y  | N  | 6      |
| 41 Hanzlick et al, <sup>76</sup> 2008          | Y | U | Y | Y | N | Y | N | Y | N | Y  | N  | 6      |
| 42 Harris et al, <sup>77</sup> 2005            | Y | U | Y | Y | N | Y | N | Y | N | Y  | N  | 6      |
| 43 Hauer et al, <sup>78</sup> 2008             | Y | U | Y | Y | N | Y | N | Y | N | Y  | N  | 6      |
| 44 Labiris et al, <sup>79</sup> 2014           | Y | U | Y | Y | N | Y | N | Y | N | Y  | N  | 6      |
| 45 Lambert et al, <sup>80</sup> 2008           | Y | U | Y | Y | N | Y | N | Y | N | Y  | N  | 6      |
| 46 Shah et al, <sup>81</sup> 2012              | Y | U | Y | Y | N | Y | N | Y | N | Y  | N  | 6      |
| 47 Lefevre et al, <sup>82</sup> 2010           | Y | U | Y | Y | N | Y | N | Y | N | Y  | N  | 6      |
| 48 Vicente et al, <sup>83</sup> 2013           | Y | U | Y | Y | N | N | Y | N | Y | Y  | N  | 6      |
| 49 Wiesenfeld et al, <sup>84</sup> 2014        | Y | U | Y | Y | Y | Y | N | Y | N | Y  | N  | 7      |
| 50 Lam et al, <sup>85</sup> 2016               | Y | U | Y | Y | Y | Y | Y | Y | Y | Y  | N  | 9      |
| 51 Hartung et al, <sup>86</sup> 2005           | Y | U | Y | Y | N | Y | N | N | N | N  | N  | 4      |
| 52 Girasek et al, <sup>87</sup> 2011           | Y | U | Y | Y | N | Y | N | N | N | Y  | N  | 5      |
| 53 Zuccato et al, <sup>88</sup> 2015           | Y | U | Y | Y | Y | Y | N | Y | N | Y  | N  | 6      |
| 54 Wilbanks et al, <sup>89</sup> 2015          | Y | U | Y | Y | N | Y | Y | Y | Y | Y  | Y  | 9      |
| 55 West et al, <sup>90</sup> 2009              | Y | U | Y | Y | Y | Y | N | Y | N | Y  | N  | 6      |
| 56 Watmough et al, <sup>91</sup> 2007          | Y | U | Y | Y | N | N | N | N | N | Y  | N  | 4      |
| 57 Thakur et al, <sup>92</sup> 2001            | Y | U | Y | Y | Y | Y | Y | N | Y | Y  | N  | 8      |
| 58 Scott et al, <sup>93</sup> 2011             | Y | U | Y | Y | N | Y | N | Y | N | Y  | N  | 6      |
| 59 Schnuth et al, <sup>94</sup> 2003           | Y | U | Y | Y | N | Y | N | Y | N | Y  | N  | 6      |
| 60 Richards et al, <sup>95</sup> 2009          | Y | U | Y | Y | N | Y | N | N | N | Y  | N  | 5      |
| 61 Reed et al, <sup>96</sup> 2009              | Y | U | Y | Y | Y | Y | Y | Y | Y | Y  | N  | 9      |
| 62 de Souza et al, <sup>97</sup> 2015          | Y | U | Y | Y | Y | Y | N | Y | N | Y  | N  | 7      |
| 63 Pikoulis et al, <sup>98</sup> 2010          | Y | U | Y | Y | N | Y | N | Y | N | Y  | N  | 6      |
| 64 Ozer et al, <sup>99</sup> 2015              | Y | U | Y | Y | N | N | Y | N | Y | Y  | N  | 6      |
| 65 Noble et al, <sup>100</sup> 2004            | Y | U | Y | Y | Y | Y | Y | Y | N | Y  | N  | 8      |
| 66 Noble et al, <sup>101</sup> 2010            | Y | U | Y | Y | N | Y | N | N | N | Y  | N  | 5      |
| 67 Newton et al, <sup>102</sup> 2005           | Y | U | Y | Y | N | Y | Y | N | N | Y  | N  | 6      |
| 68 Moore et al, <sup>103</sup> 2012            | Y | U | Y | Y | Y | Y | N | Y | N | N  | N  | 6      |
| 69 Momen et al, <sup>104</sup> 2015            | Y | U | Y | Y | N | Y | N | Y | N | Y  | N  | 6      |
| 70 Mehmood et al, <sup>105</sup> 2012          | Y | U | Y | Y | N | Y | N | Y | N | Y  | N  | 6      |
| 71 Loriot et al, <sup>106</sup> 2010           | Y | U | Y | Y | Y | Y | N | Y | N | Y  | N  | 7      |
| 72 Lefevre et al, <sup>107</sup> 2010          | Y | U | Y | Y | Y | Y | N | Y | N | Y  | N  | 7      |

**Quality assessment criteria in detail**

1. Define the source of information (survey, record review).
2. List the inclusion and exclusion criteria for the exposed and unexposed subjects (cases and controls) or refer to previous publications.
3. Indicate the time period used for identifying patients.
4. Indicate whether the subjects were consecutive if not population-based.
5. Indicate whether the evaluators of the subjective components of the study were masked to the other aspects of participants' status.
6. Describe any assessments undertaken for quality assurance purposes (e.g., test/retest of primary outcome measurements)
7. Explain any patient exclusion from the analyses.
8. Describe how confounding was assessed and/or controlled.
9. If applicable, explain how missing data were handled in the analysis.
10. Summarize the patient response rates and the completeness of the data collection.
11. Clarify what follow-up, if any, was expected and the percentage of patients with incomplete data or follow-up.

**“Y”:** Yes; **“N”:** No; **“U”:** Unclear.

**Table S2. Meta-analyses of the Factors Influencing Medical Students' Choice of Subspecialty Stratified by Region and Survey Year.**

| Factor                                           |             | No. of studies | Total no. of participants | Extent of influence (%) | <i>P</i> -Value | <i>Q</i> -Value |
|--------------------------------------------------|-------------|----------------|---------------------------|-------------------------|-----------------|-----------------|
| Academic interest                                | developed   | 27             | 79,910                    | 79.30                   | 0.02            | 3.37            |
|                                                  | developing  | 10             | 2,366                     | 60.41                   |                 |                 |
|                                                  | before 2010 | 29             | 44,174                    | 78.88                   | 0.33            | 1.40            |
|                                                  | after 2010  | 8              | 38,102                    | 70.44                   |                 |                 |
| Competencies                                     | before 2010 | 9              | 43,134                    | 44.44                   | 0.21            | 1.86            |
|                                                  | after 2010  | 8              | 33,381                    | 66.60                   |                 |                 |
| Controllable lifestyle or flexible work schedule | developed   | 36             | 100,799                   | 51.97                   | 0.53            | 0.89            |
|                                                  | developing  | 6              | 1,581                     | 51.47                   |                 |                 |
| Patient service orientation                      | before 2010 | 22             | 62,945                    | 53.72                   | 0.99            | 0.02            |
|                                                  | after 2010  | 20             | 39,439                    | 52.34                   |                 |                 |
| Medical teachers or mentors                      | developed   | 25             | 43,964                    | 49.69                   | 0.99            | 0.02            |
|                                                  | developing  | 9              | 1,901                     | 48.99                   |                 |                 |
|                                                  | before 2010 | 18             | 40,997                    | 49.56                   |                 |                 |
| Career opportunities                             | after 2010  | 16             | 4,868                     | 49.97                   | 0.83            | 0.31            |
|                                                  | developed   | 28             | 84,076                    | 46.43                   |                 |                 |
|                                                  | developing  | 4              | 995                       | 51.14                   |                 |                 |
| Workload or working hours                        | before 2010 | 21             | 49,654                    | 48.48                   | 0.70            | 0.54            |
|                                                  | after 2010  | 11             | 35,417                    | 43.87                   |                 |                 |
|                                                  | developed   | 31             | 79,867                    | 42.36                   |                 |                 |
| Income                                           | developing  | 7              | 2,056                     | 48.24                   | 0.60            | 0.74            |
|                                                  | before 2010 | 20             | 43,417                    | 47.97                   |                 |                 |
|                                                  | after 2010  | 18             | 38,506                    | 39.87                   |                 |                 |
| Length of training                               | developed   | 14             | 20,789                    | 42.36                   | 0.34            | 1.35            |
|                                                  | developing  | 5              | 1,081                     | 25.72                   |                 |                 |
|                                                  | before 2010 | 9              | 19,456                    | 43.93                   |                 |                 |
| Prestige                                         | after 2010  | 10             | 2,414                     | 32.04                   | 0.42            | 1.17            |
|                                                  | developed   | 38             | 106,910                   | 34.69                   |                 |                 |
|                                                  | developing  | 11             | 2,700                     | 38.36                   |                 |                 |
| Advice from others                               | before 2010 | 25             | 68,714                    | 37.01                   | 0.50            | 0.95            |
|                                                  | after 2010  | 24             | 40,896                    | 33.69                   |                 |                 |
|                                                  | developed   | 15             | 41,246                    | 33.95                   |                 |                 |
| Student debt                                     | developing  | 3              | 800                       | 22.92                   | 0.31            | 1.48            |
|                                                  | before 2010 | 7              | 8,811                     | 26.72                   |                 |                 |
|                                                  | after 2010  | 11             | 33,234                    | 35.87                   |                 |                 |
| Prestige                                         | developed   | 16             | 27,806                    | 24.45                   | 0.01            | 4.31            |
|                                                  | developing  | 8              | 2,206                     | 48.02                   |                 |                 |
|                                                  | before 2010 | 12             | 25,542                    | 27.86                   |                 |                 |
| Advice from others                               | after 2010  | 12             | 4,470                     | 36.12                   | 0.25            | 1.67            |
|                                                  | developed   | 14             | 81,205                    | 24.95                   |                 |                 |
|                                                  | developing  | 4              | 1,487                     | 35.62                   |                 |                 |
| Student debt                                     | before 2010 | 10             | 48,319                    | 21.61                   | 0.31            | 1.47            |
|                                                  | after 2010  | 8              | 34,373                    | 32.13                   |                 |                 |
|                                                  | before 2010 | 5              | 6,610                     | 20.29                   |                 |                 |
|                                                  | after 2010  | 3              | 32,307                    | 11.08                   | 0.69            | 0.59            |



**Figure S1. Flow Diagram of the Study Inclusion.**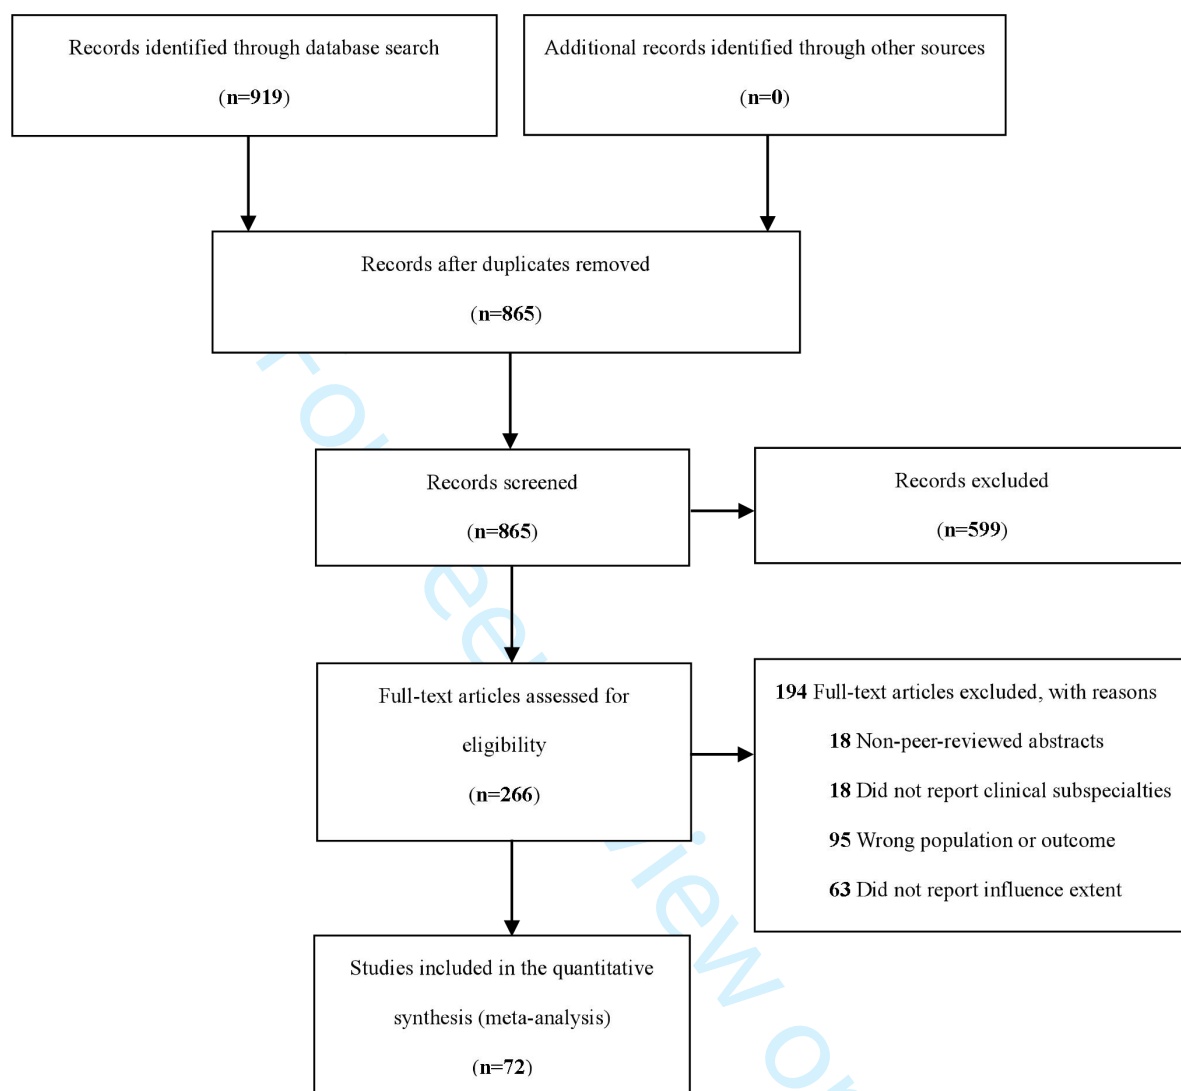

Figure S2. Forest Plot of “Academic Interest”.

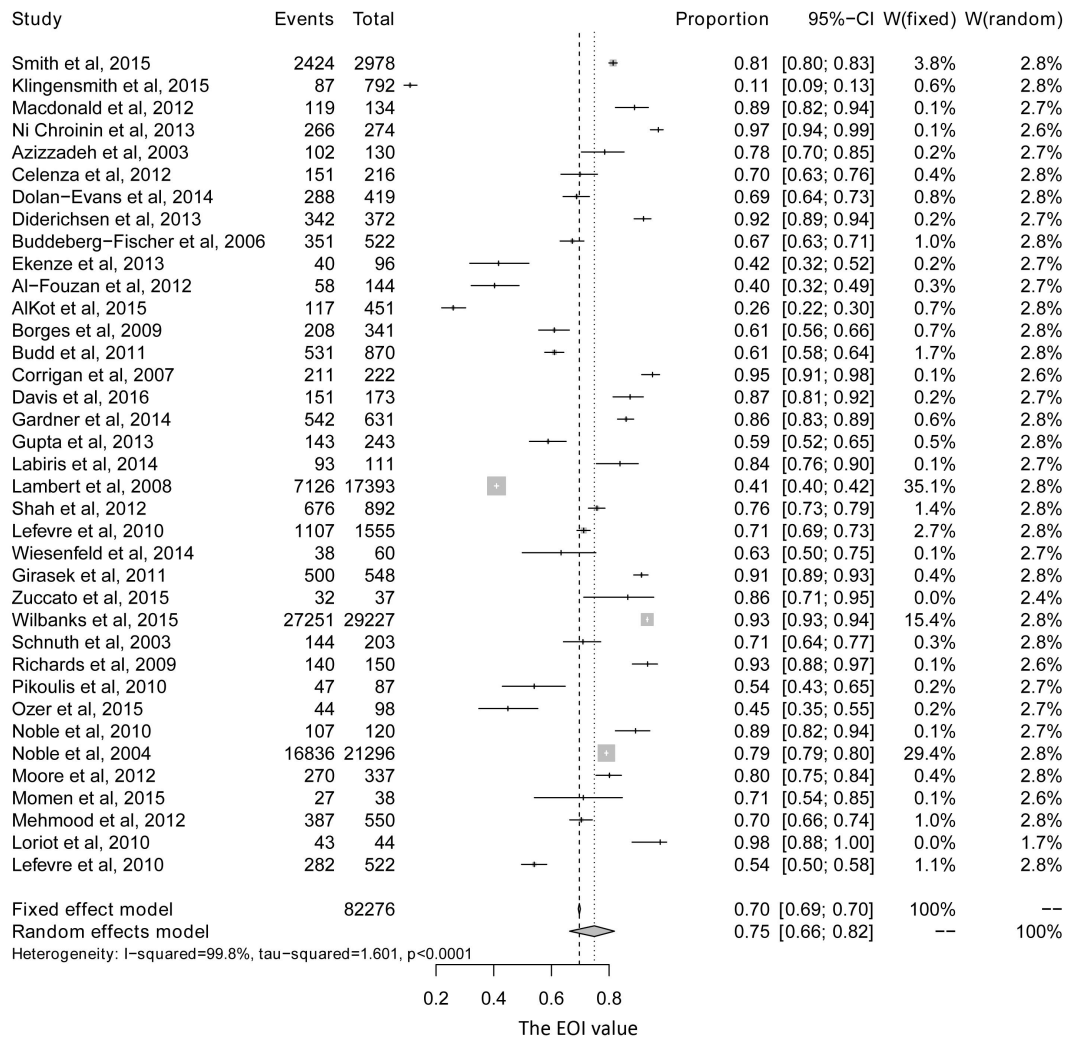

**Figure S3. Forest Plot of “Competencies”.**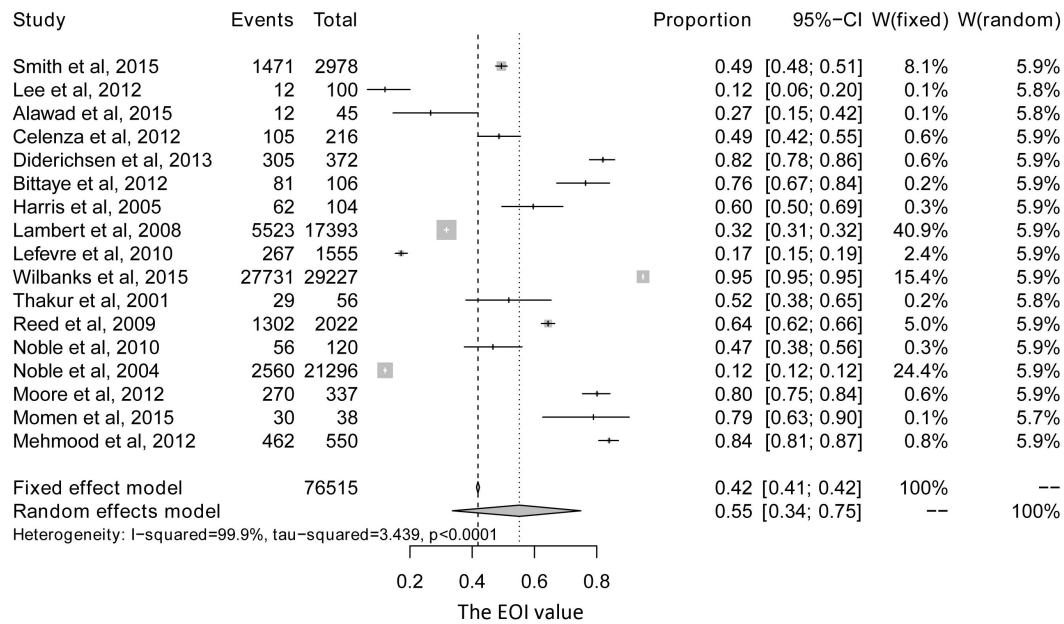

**Figure S4. Forest Plot of “Controllable Lifestyle or Flexible Work Schedule”.**

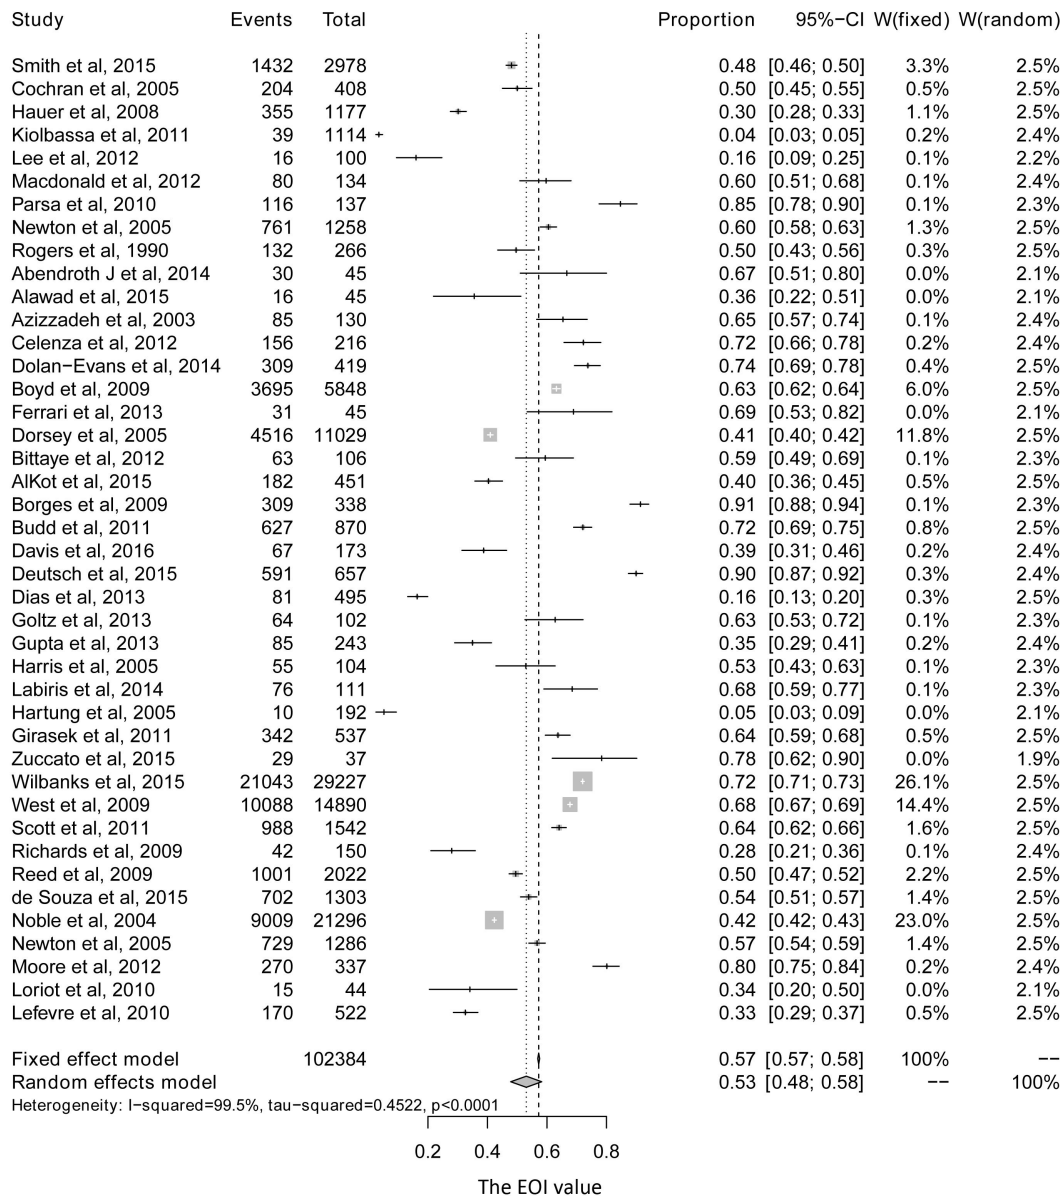

**Figure S5. Forest Plot of “Patient Service Orientation”.**

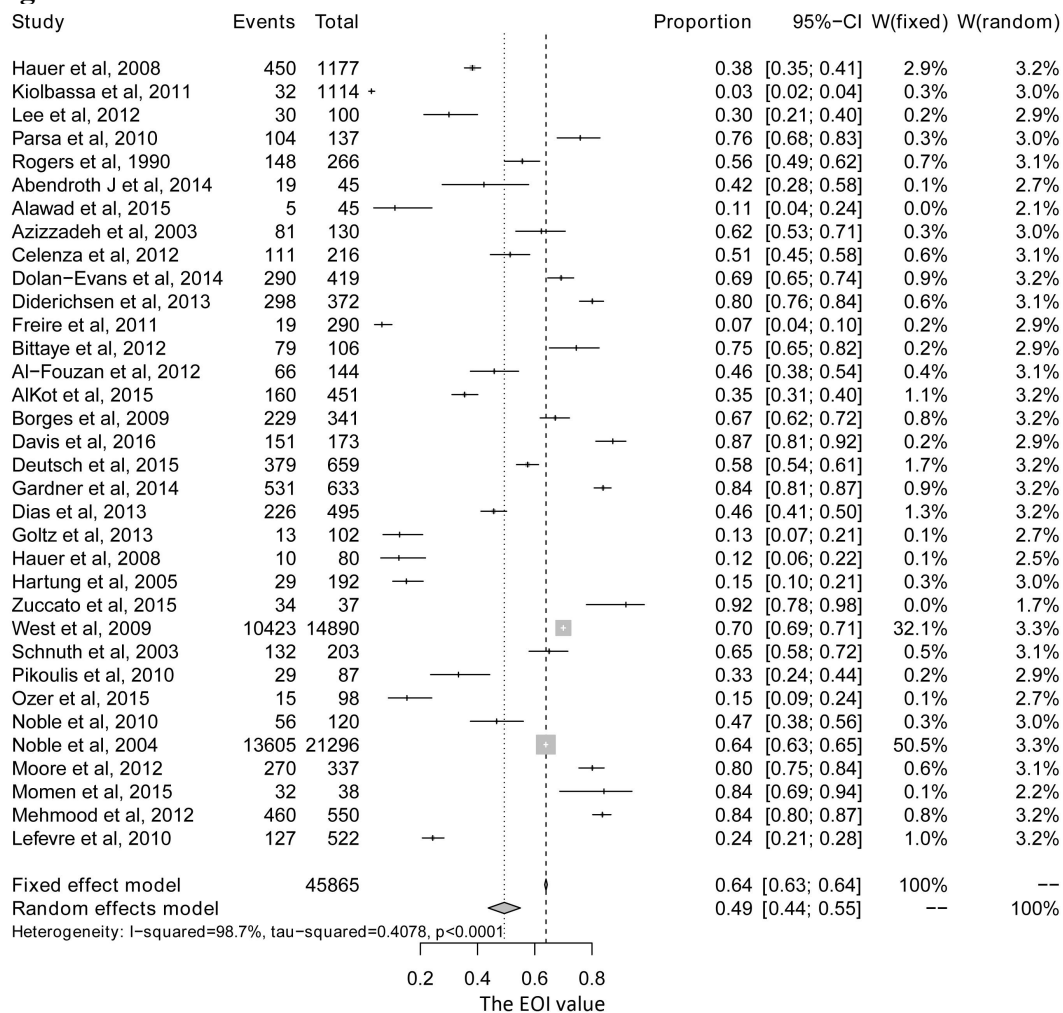

only

**Figure S6. Forest Plot of “Medical Teachers or Mentors”.**

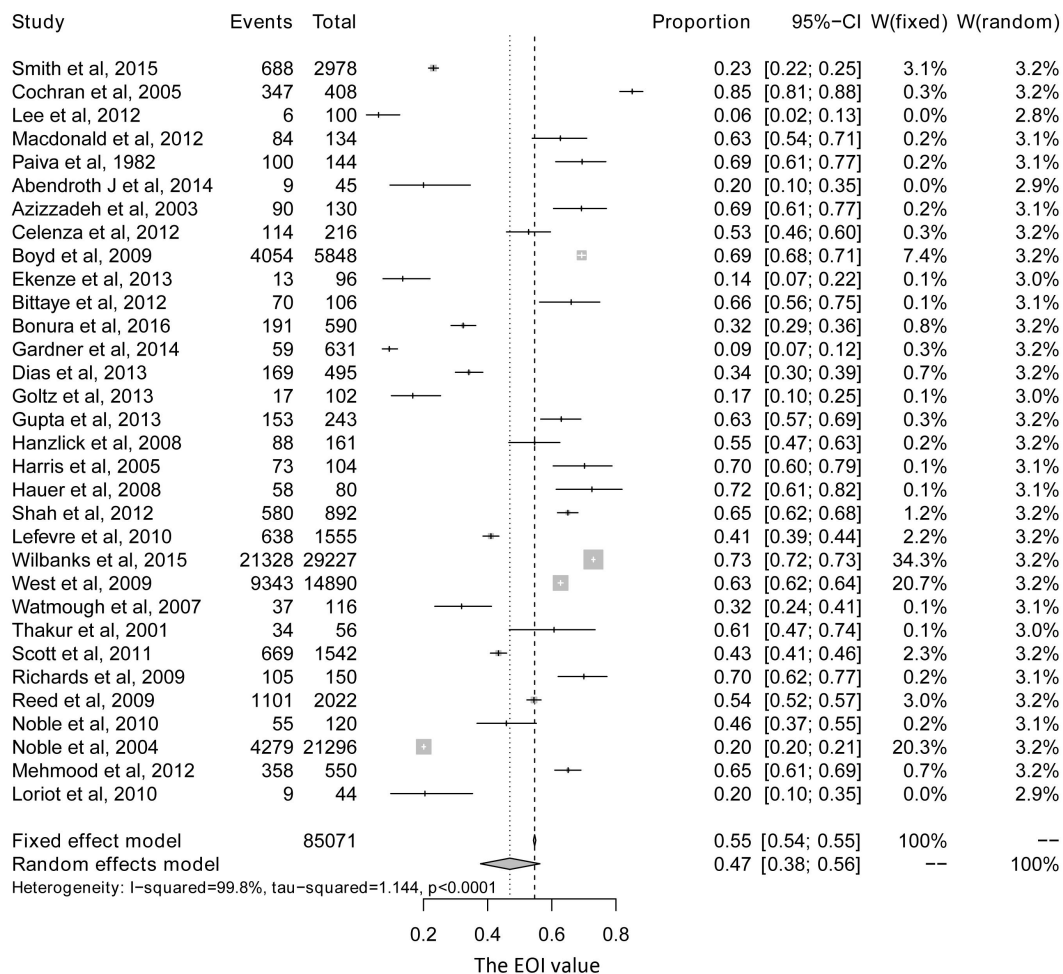

Figure S7. Forest Plot of “Career Opportunities”.

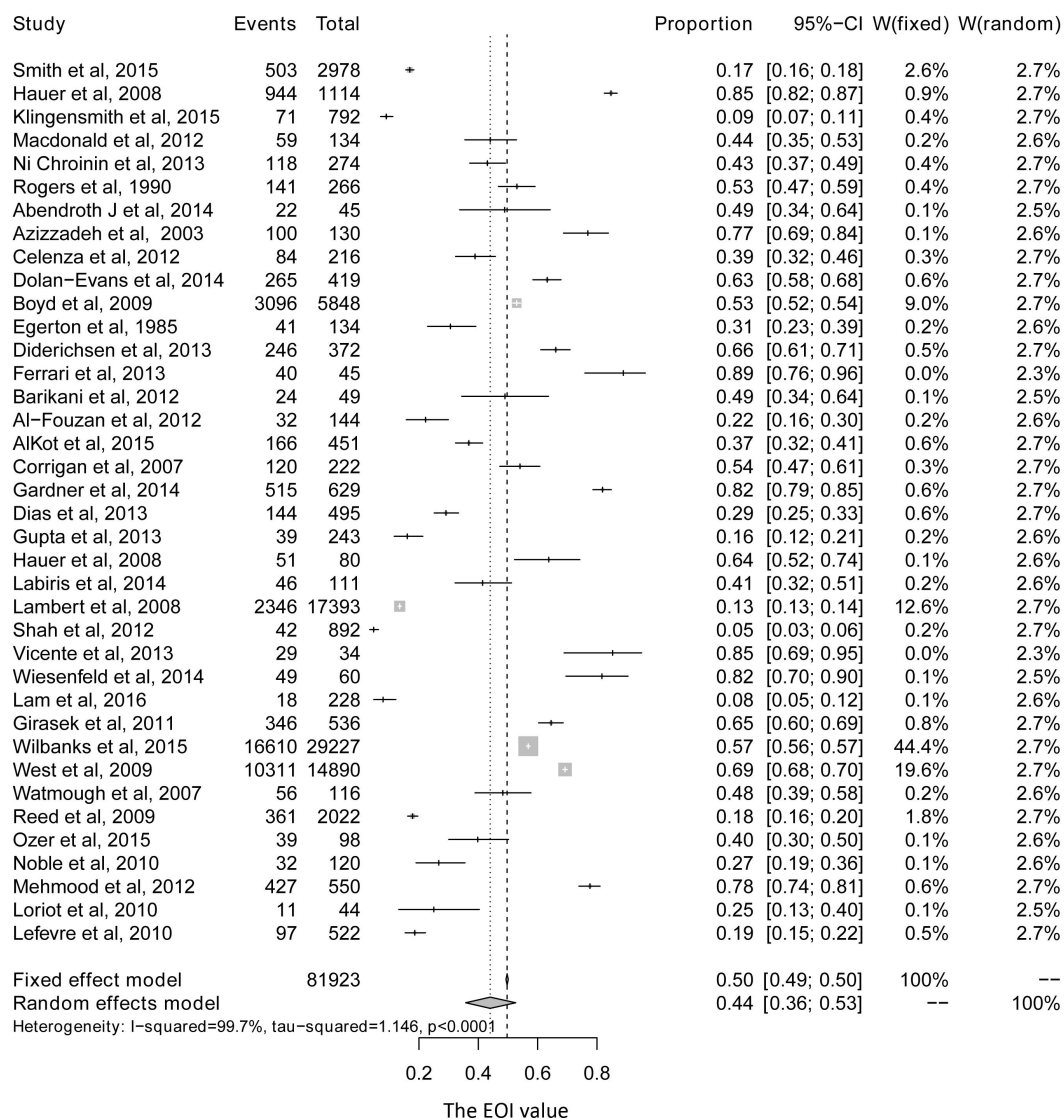

**Figure S8. Forest Plot of “Workload or Working Hours”.**

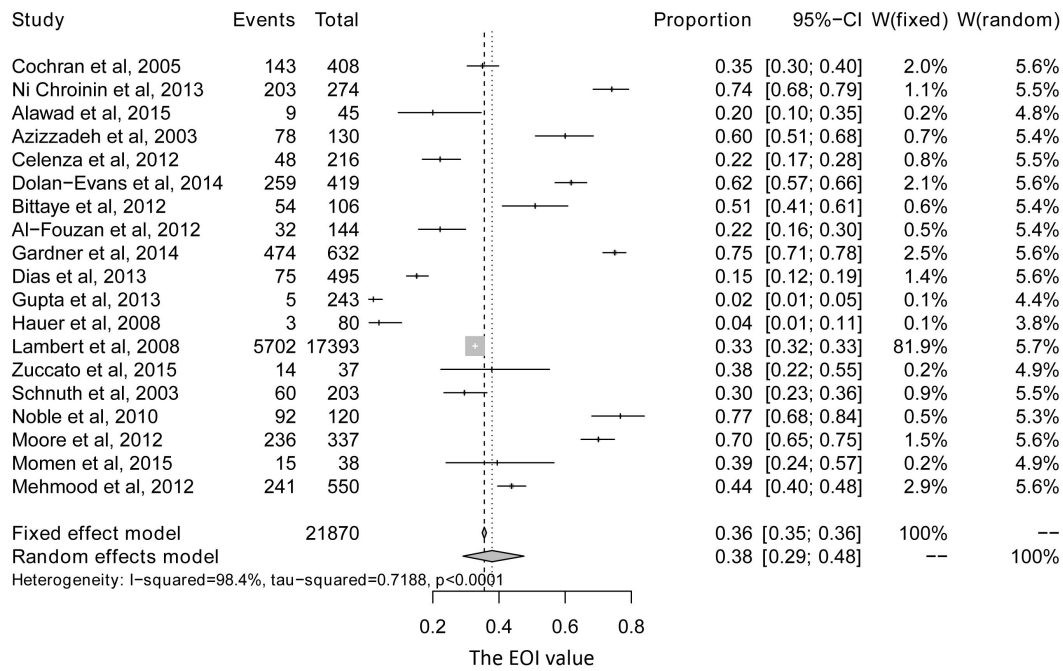

Review only



Figure S9. Forest Plot of “Income”.

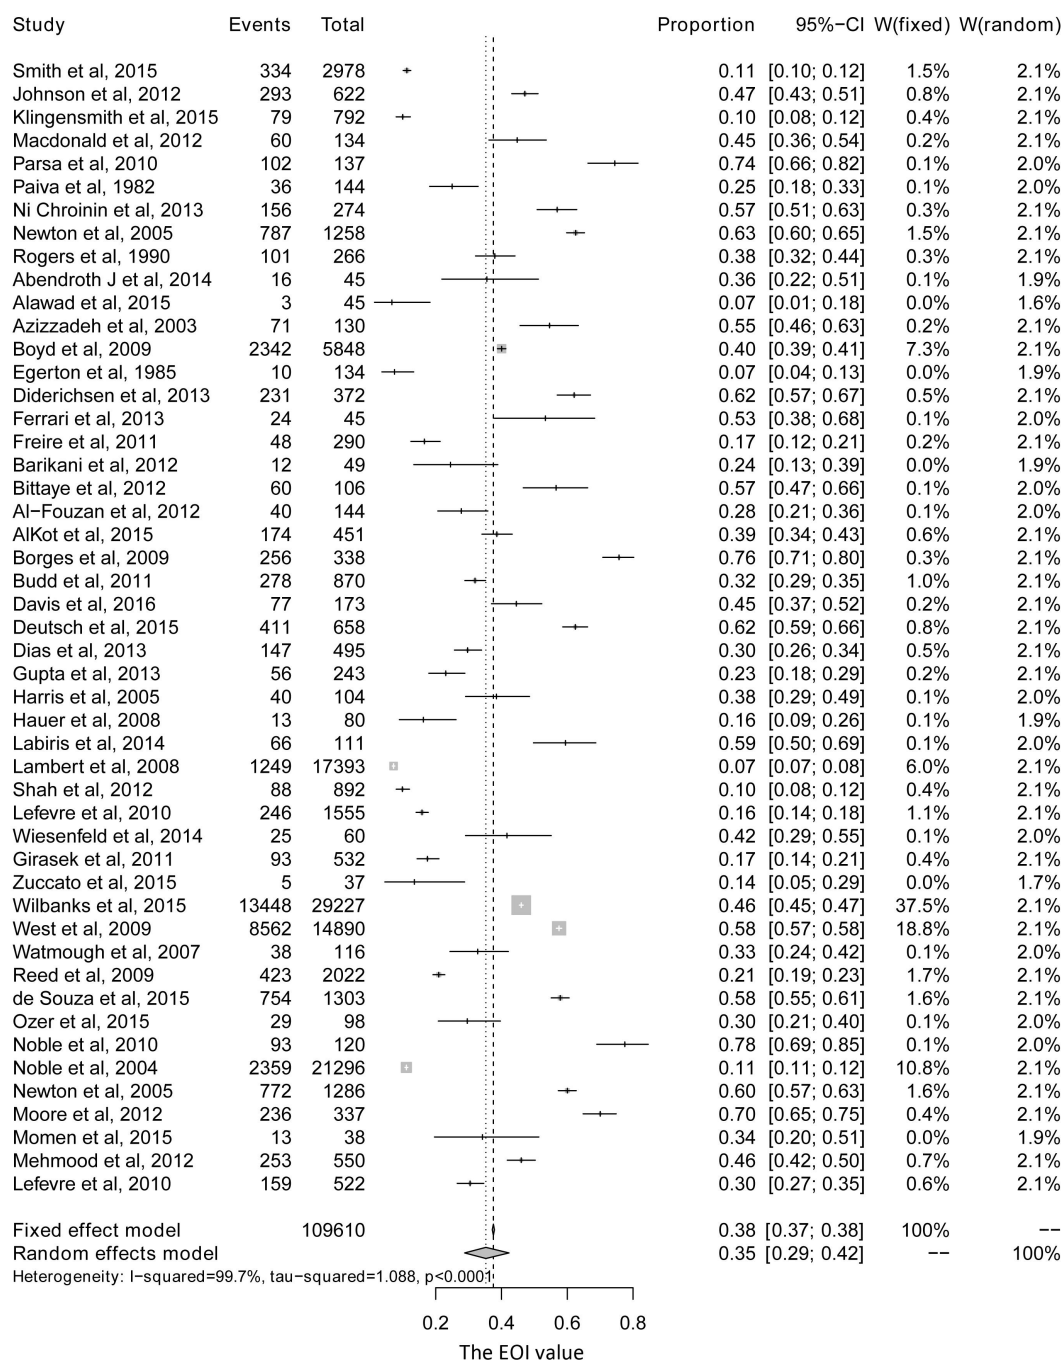

**Figure S10. Forest Plot of “Length of Training”.**

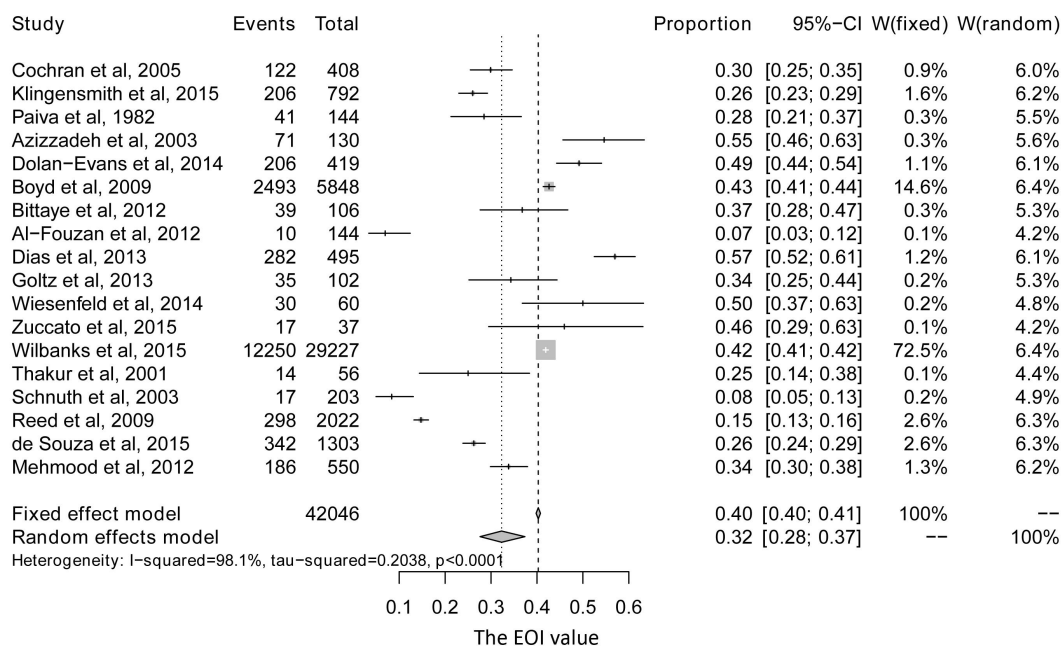

Figure S11. Forest Plot of “Prestige”.

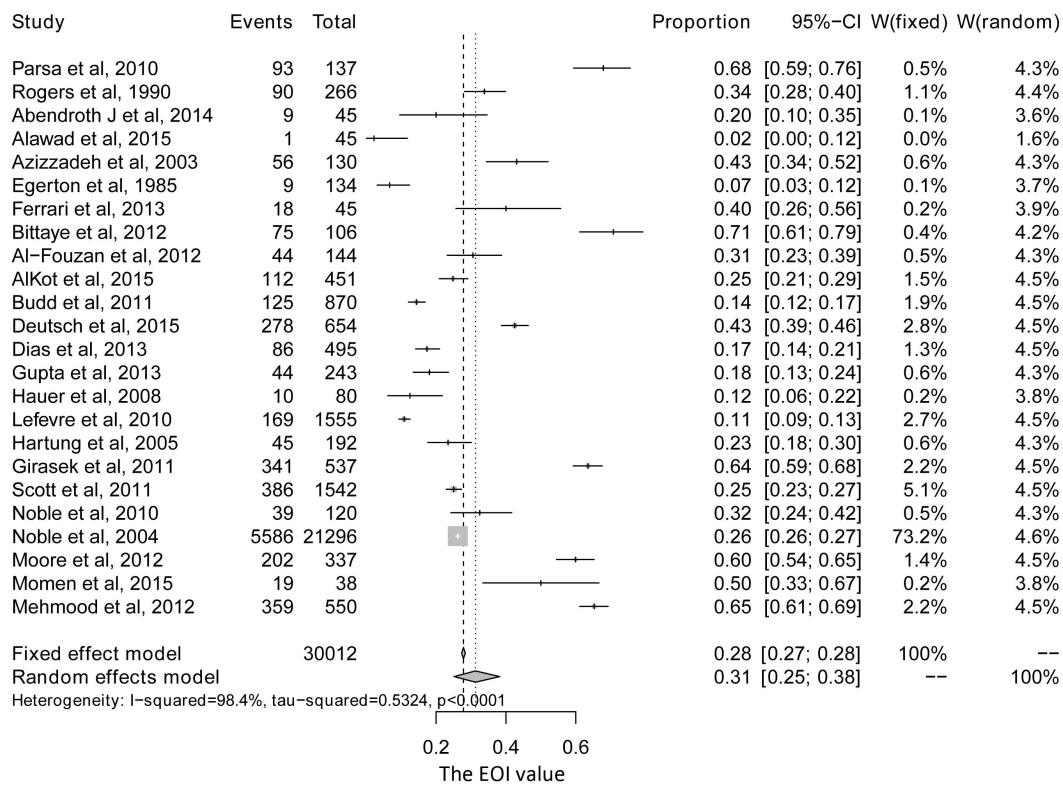

Review only

Figure S12. Forest Plot of “Advice from Others”.

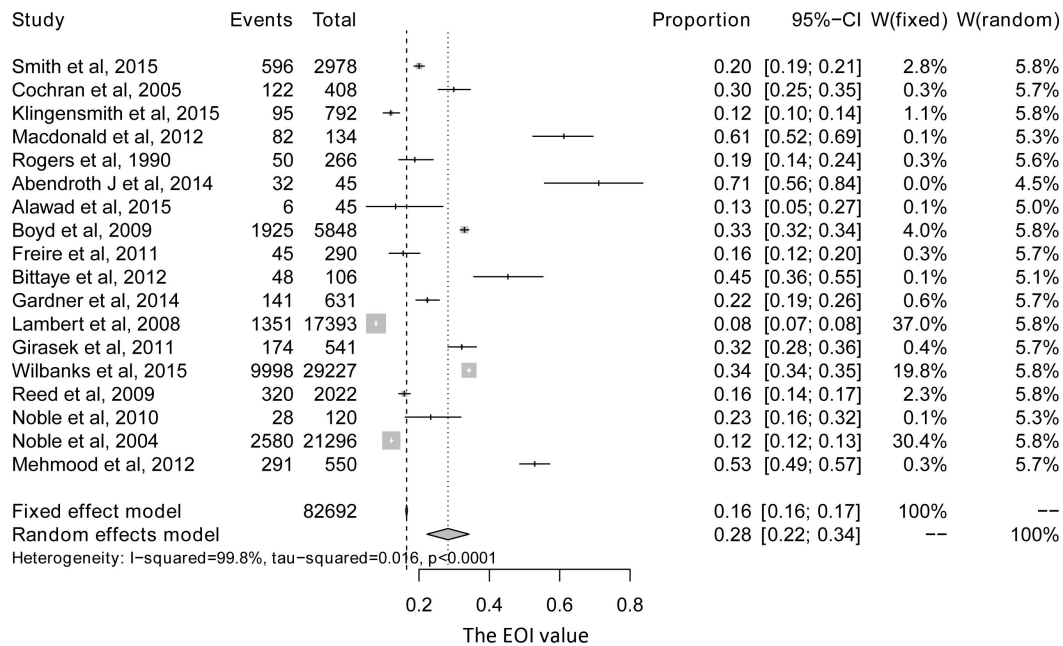

Figure S13. Forest Plot of “Student Debt”.

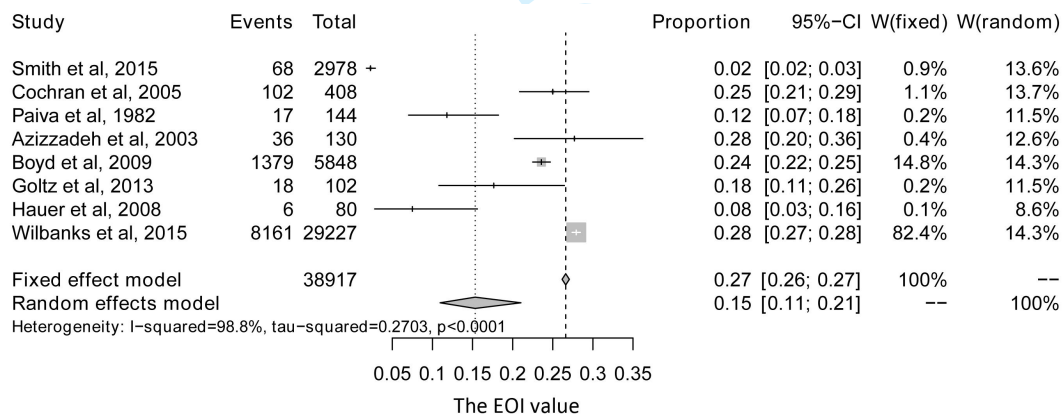

Figure S14. Funnel Plots of the Publication Bias Testing of the 12 Factors.

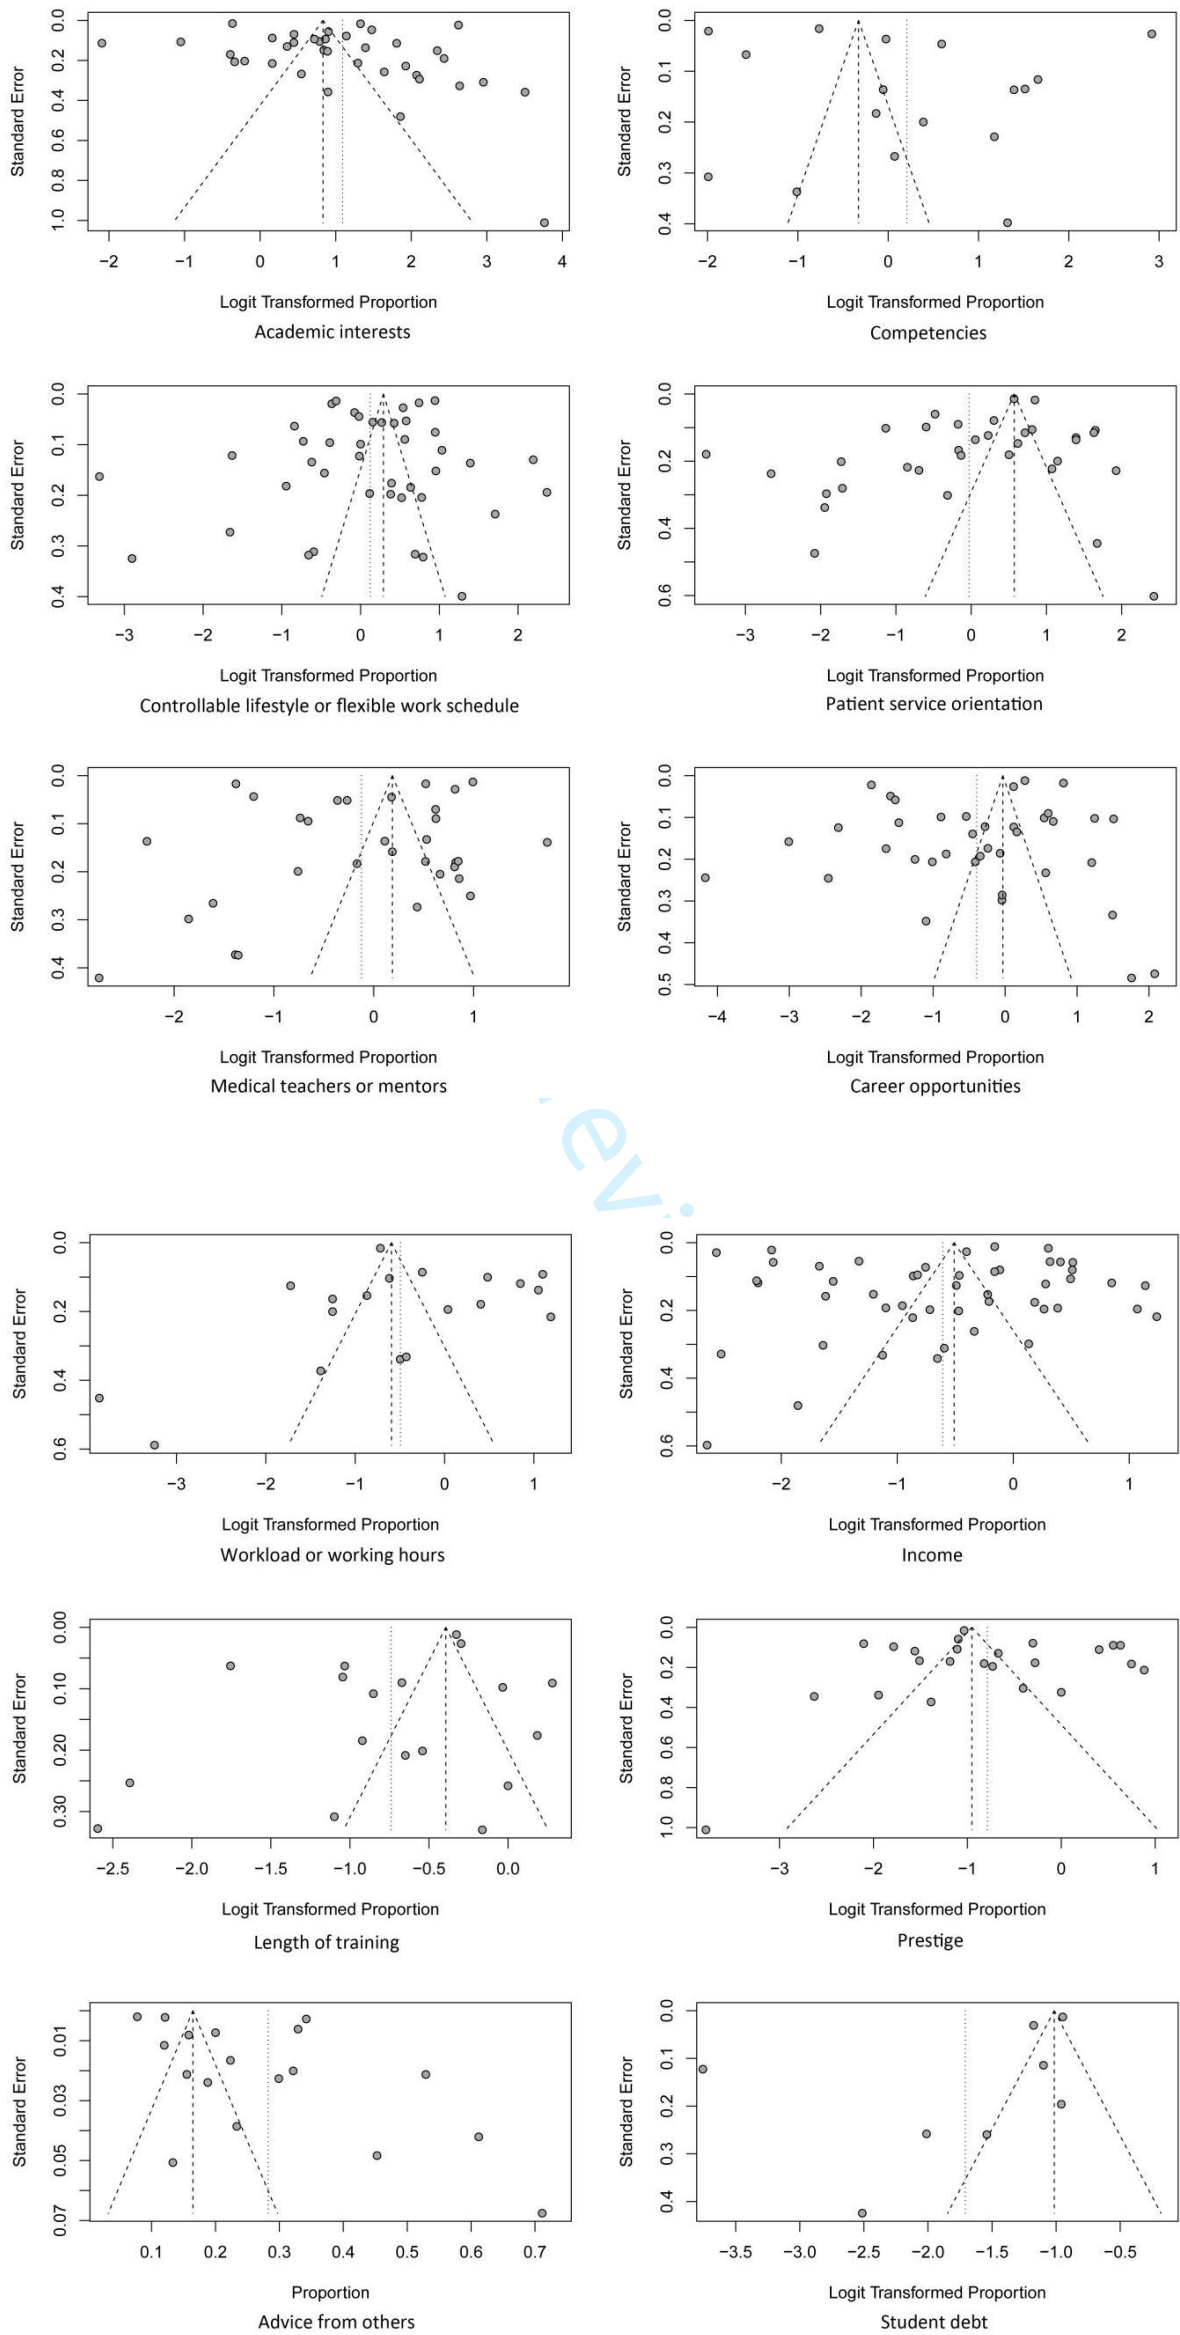

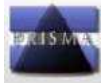

# PRISMA 2009 Checklist

| Section/topic                      | #  | Checklist item                                                                                                                                                                                                                                                                                              | Reported on page # |
|------------------------------------|----|-------------------------------------------------------------------------------------------------------------------------------------------------------------------------------------------------------------------------------------------------------------------------------------------------------------|--------------------|
| <b>TITLE</b>                       |    |                                                                                                                                                                                                                                                                                                             |                    |
| Title                              | 1  | Identify the report as a systematic review, meta-analysis, or both.                                                                                                                                                                                                                                         | 1                  |
| <b>ABSTRACT</b>                    |    |                                                                                                                                                                                                                                                                                                             |                    |
| Structured summary                 | 2  | Provide a structured summary including, as applicable: background; objectives; data sources; study eligibility criteria, participants, and interventions; study appraisal and synthesis methods; results; limitations; conclusions and implications of key findings; systematic review registration number. | 2-3                |
| <b>INTRODUCTION</b>                |    |                                                                                                                                                                                                                                                                                                             |                    |
| Rationale                          | 3  | Describe the rationale for the review in the context of what is already known.                                                                                                                                                                                                                              | 4                  |
| Objectives                         | 4  | Provide an explicit statement of questions being addressed with reference to participants, interventions, comparisons, outcomes, and study design (PICOS).                                                                                                                                                  | 5                  |
| <b>METHODS</b>                     |    |                                                                                                                                                                                                                                                                                                             |                    |
| Protocol and registration          | 5  | Indicate if a review protocol exists, if and where it can be accessed (e.g., Web address), and, if available, provide registration information including registration number.                                                                                                                               | 3                  |
| Eligibility criteria               | 6  | Specify study characteristics (e.g., PICOS, length of follow-up) and report characteristics (e.g., years considered, language, publication status) used as criteria for eligibility, giving rationale.                                                                                                      | 5                  |
| Information sources                | 7  | Describe all information sources (e.g., databases with dates of coverage, contact with study authors to identify additional studies) in the search and date last searched.                                                                                                                                  | 5                  |
| Search                             | 8  | Present full electronic search strategy for at least one database, including any limits used, such that it could be repeated.                                                                                                                                                                               | 5                  |
| Study selection                    | 9  | State the process for selecting studies (i.e., screening, eligibility, included in systematic review, and, if applicable, included in the meta-analysis).                                                                                                                                                   | 5-6                |
| Data collection process            | 10 | Describe method of data extraction from reports (e.g., piloted forms, independently, in duplicate) and any processes for obtaining and confirming data from investigators.                                                                                                                                  | 6                  |
| Data items                         | 11 | List and define all variables for which data were sought (e.g., PICOS, funding sources) and any assumptions and simplifications made.                                                                                                                                                                       | 6                  |
| Risk of bias in individual studies | 12 | Describe methods used for assessing risk of bias of individual studies (including specification of whether this was done at the study or outcome level), and how this information is to be used in any data synthesis.                                                                                      | 6-7                |
| Summary measures                   | 13 | State the principal summary measures (e.g., risk ratio, difference in means).                                                                                                                                                                                                                               | 6-7                |
| Synthesis of results               | 14 | Describe the methods of handling data and combining results of studies, if done, including measures of consistency (e.g., $I^2$ ) for each meta-analysis.                                                                                                                                                   | 7                  |

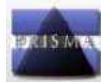

# PRISMA 2009 Checklist

Page 1 of 2

| Section/topic                 | #  | Checklist item                                                                                                                                                                                           | Reported on page # |
|-------------------------------|----|----------------------------------------------------------------------------------------------------------------------------------------------------------------------------------------------------------|--------------------|
| Risk of bias across studies   | 15 | Specify any assessment of risk of bias that may affect the cumulative evidence (e.g., publication bias, selective reporting within studies).                                                             | 7                  |
| Additional analyses           | 16 | Describe methods of additional analyses (e.g., sensitivity or subgroup analyses, meta-regression), if done, indicating which were pre-specified.                                                         | 7                  |
| <b>RESULTS</b>                |    |                                                                                                                                                                                                          |                    |
| Study selection               | 17 | Give numbers of studies screened, assessed for eligibility, and included in the review, with reasons for exclusions at each stage, ideally with a flow diagram.                                          | 5, 7               |
| Study characteristics         | 18 | For each study, present characteristics for which data were extracted (e.g., study size, PICOS, follow-up period) and provide the citations.                                                             | 7-8                |
| Risk of bias within studies   | 19 | Present data on risk of bias of each study and, if available, any outcome level assessment (see item 12).                                                                                                | 8                  |
| Results of individual studies | 20 | For all outcomes considered (benefits or harms), present, for each study: (a) simple summary data for each intervention group (b) effect estimates and confidence intervals, ideally with a forest plot. | 8                  |
| Synthesis of results          | 21 | Present results of each meta-analysis done, including confidence intervals and measures of consistency.                                                                                                  | 8-9                |
| Risk of bias across studies   | 22 | Present results of any assessment of risk of bias across studies (see Item 15).                                                                                                                          | 8-9                |
| Additional analysis           | 23 | Give results of additional analyses, if done (e.g., sensitivity or subgroup analyses, meta-regression [see Item 16]).                                                                                    | 8-9                |
| <b>DISCUSSION</b>             |    |                                                                                                                                                                                                          |                    |
| Summary of evidence           | 24 | Summarize the main findings including the strength of evidence for each main outcome; consider their relevance to key groups (e.g., healthcare providers, users, and policy makers).                     | 9-13               |
| Limitations                   | 25 | Discuss limitations at study and outcome level (e.g., risk of bias), and at review-level (e.g., incomplete retrieval of identified research, reporting bias).                                            | 13                 |
| Conclusions                   | 26 | Provide a general interpretation of the results in the context of other evidence, and implications for future research.                                                                                  | 14                 |
| <b>FUNDING</b>                |    |                                                                                                                                                                                                          |                    |
| Funding                       | 27 | Describe sources of funding for the systematic review and other support (e.g., supply of data); role of funders for the systematic review.                                                               | 15                 |

From: Moher D, Liberati A, Tetzlaff J, Altman DG, The PRISMA Group (2009). Preferred Reporting Items for Systematic Reviews and Meta-Analyses: The PRISMA Statement. PLoS Med 6(6): e1000097. doi:10.1371/journal.pmed1000097

For more information, visit: [www.prisma-statement.org](http://www.prisma-statement.org).

Page 2 of 2

For peer review only - <http://bmjopen.bmj.com/site/about/guidelines.xhtml>

# BMJ Open

## Factors Influencing Subspecialty Choice Among Medical Students: A Systematic Review and Meta-analysis

|                                 |                                                                                                                                                                                                                                                                                                                                                                                                                                                                                                                                                                                                                                                                                                                                                                                                                                                                                                                                                                                                                                                                       |
|---------------------------------|-----------------------------------------------------------------------------------------------------------------------------------------------------------------------------------------------------------------------------------------------------------------------------------------------------------------------------------------------------------------------------------------------------------------------------------------------------------------------------------------------------------------------------------------------------------------------------------------------------------------------------------------------------------------------------------------------------------------------------------------------------------------------------------------------------------------------------------------------------------------------------------------------------------------------------------------------------------------------------------------------------------------------------------------------------------------------|
| Journal:                        | <i>BMJ Open</i>                                                                                                                                                                                                                                                                                                                                                                                                                                                                                                                                                                                                                                                                                                                                                                                                                                                                                                                                                                                                                                                       |
| Manuscript ID                   | bmjopen-2018-022097.R1                                                                                                                                                                                                                                                                                                                                                                                                                                                                                                                                                                                                                                                                                                                                                                                                                                                                                                                                                                                                                                                |
| Article Type:                   | Research                                                                                                                                                                                                                                                                                                                                                                                                                                                                                                                                                                                                                                                                                                                                                                                                                                                                                                                                                                                                                                                              |
| Date Submitted by the Author:   | 05-Jul-2018                                                                                                                                                                                                                                                                                                                                                                                                                                                                                                                                                                                                                                                                                                                                                                                                                                                                                                                                                                                                                                                           |
| Complete List of Authors:       | Yang, Yahan; Sun Yat-Sen University Zhongshan Ophthalmic Center, State Key Laboratory of Ophthalmology; Sun Yat-Sen University, Zhongshan School of Medicine<br>Li, Jiawei; Sun Yat-Sen University, Zhongshan School of Mathematics<br>Wu, Xiaohang; Sun Yat-Sen University Zhongshan Ophthalmic Center, State Key Laboratory of Ophthalmology<br>Wang, Jinghui; Sun Yat-Sen University Zhongshan Ophthalmic Center, State Key Laboratory of Ophthalmology<br>Li, Wangting; Sun Yat-Sen University Zhongshan Ophthalmic Center, State Key Laboratory of Ophthalmology<br>Zhu, Yi; University of Miami School of Medicine, Department of Molecular and Cellular Pharmacology; Sun Yat-Sen University Zhongshan Ophthalmic Center, Cataract<br>Chen, Chuan; State Key Laboratory of Ophthalmology, Zhongshan Ophthalmic Center, Sun Yat-sen University; University of Miami School of Medicine, Department of Molecular and Cellular Pharmacology<br>Lin, Haotian; State Key Laboratory of Ophthalmology, Zhongshan Ophthalmic Center, Sun Yat-sen University, Cataract |
| <b>Primary Subject Heading</b>: | Medical education and training                                                                                                                                                                                                                                                                                                                                                                                                                                                                                                                                                                                                                                                                                                                                                                                                                                                                                                                                                                                                                                        |
| Secondary Subject Heading:      | Medical education and training                                                                                                                                                                                                                                                                                                                                                                                                                                                                                                                                                                                                                                                                                                                                                                                                                                                                                                                                                                                                                                        |
| Keywords:                       | Medical students, Career choice, Meta-analysis                                                                                                                                                                                                                                                                                                                                                                                                                                                                                                                                                                                                                                                                                                                                                                                                                                                                                                                                                                                                                        |
|                                 |                                                                                                                                                                                                                                                                                                                                                                                                                                                                                                                                                                                                                                                                                                                                                                                                                                                                                                                                                                                                                                                                       |

SCHOLARONE™  
Manuscripts



1  
2  
3 **1 Title Page**  
4

5 **2 Factors Influencing Subspecialty Choice Among Medical Students: A Systematic**  
6

7 **3 Review and Meta-analysis**  
8

9 Yahan Yang, M.D.<sup>1,2</sup>; Jiawei Li, M.D.<sup>3</sup>; Xiaohang Wu, M.D.<sup>1</sup>; Jinghui Wang, M.D.<sup>1</sup>;  
10 Wangting Li, M.D.<sup>1</sup>; Yi Zhu, M.D.<sup>1,4</sup>; Chuan Chen, M.D.<sup>1,4</sup>; Haotian Lin, M.D., Ph.  
11 D<sup>1#</sup>  
12  
13  
14  
15  
16  
17

18 **Institution:** 1. State Key Laboratory of Ophthalmology, Zhongshan Ophthalmic  
19 Center, Sun Yat-sen University, Guangzhou, Guangdong, 510060, People's Republic  
20 of China  
21  
22

23 2. Zhongshan School of Medicine, Sun Yat-sen University, Guangzhou, China  
24

25 3. Zhongshan School of Mathematics, Sun Yat-sen University, Guangzhou, China  
26

27 4. Department of Molecular and Cellular Pharmacology, University of Miami Miller  
28 School of Medicine, Miami, Florida 33136, USA.  
29  
30  
31  
32

33 15

34  
35 **#Editorial Correspondence:**  
36

37 Prof. Haotian Lin  
38

39 Zhongshan Ophthalmic Center, Sun Yat-sen University  
40

41 Xian Lie South Road 54#  
42

43 Guangzhou, China, 510060.  
44

45 Telephone number: +86-020-87330493  
46

47 Fax: +86-020-87333271  
48

49 E-mail: haot.lin@hotmail.com  
50

51 Word count for text: 3122  
52  
53  
54

55 25  
56  
57  
58  
59  
60

1  
2  
3 26 **ABSTRACT**

4  
5 27 **Objective** To characterize the contributing factors that affect medical students'

6  
7 28 subspecialty choice and to estimate the extent of influence of individual

8  
9 29 factors on the students' decision-making process.

10  
11 30 **Design** Systematic review and meta-analysis.

12  
13 31 **Methods** A systematic search of the Cochrane Library, ERIC, Web of Science, CNKI

14  
15 32 and PubMed databases was conducted for studies published between January

16  
17 33 1977 and June 2018. Information concerning study characteristics, influential

18  
19 34 factors, and the extent of their influence (EOI) was extracted independently

20  
21 35 by two trained investigators. EOI is the percentage level that describes how

22  
23 36 much each of the factors influenced students' choice of subspecialty. The

24  
25 37 estimates were pooled using a random-effects meta-analysis model due to the

26  
27 38 between-study heterogeneity.

28  
29 39 **Results** Data were extracted from 75 studies (882,209 individuals). Overall, the

30  
31 40 factors influencing medical students' choice of subspecialty training mainly

32  
33 41 included academic interests (75.29%), competencies (55.15%), controllable

34  
35 42 lifestyles or flexible work schedules (53.00%), patient service orientation

36  
37 43 (50.04%), medical teachers or mentors (46.93%), career opportunities

38  
39 44 (44.00%), workload or working hours (37.99%), income (34.70%), length of

40  
41 45 training (32.30%), prestige (31.17%), advice from others (28.24%), and

42  
43 46 student debt (15.33%), with significant between-study heterogeneity

44  
45 47 ( $P<0.0001$ ). Subgroup analyses revealed that the EOI of academic interests

46  
47 48 was higher in developed countries than that in developing countries (79.66%

48  
49 49 [95% confidence interval (CI), 70.73%; 86.39%] vs. 60.41% [95% CI,

50  
51 50 43.44%; 75.19%];  $Q=3.51$   $P=0.02$ ). The EOI value of prestige was lower in

1  
2  
3 51 developed countries than that in developing countries (23.96% [95% CI,  
4  
5 52 19.20%; 29.47%] vs. 47.65% [95% CI, 34.41%; 61.24%];  $Q=4.71$   $P=0.01$ ).

6  
7 53 **Conclusions** This systematic review and meta-analysis provided a quantitative  
8  
9 54 evaluation of the top 12 influencing factors associated with medical students'  
10  
11 55 choice of subspecialty. Our findings provide the basis for the development of  
12  
13 56 specific, effective strategies to optimize the distribution of physicians among  
14  
15 57 different departments by modifying these influencing factors.

16  
17  
18 58 **Systematic review registration** PROSPERO CRD42017053781.

19  
20 59 **STRENGTHS AND LIMITATIONS OF THIS STUDY**

- 21  
22 60 ● This is the first study that provide a systematic estimate of the factors associated  
23  
24 61 with medical students' subspecialty choices.  
25  
26 62 ● A large number of studies conducted in varied populations have been included.  
27  
28 63 ● The differences in the characteristics of country, survey years, specialty, the type  
29  
30 64 of data used and sample size across studies represent a major limitation of our  
31  
32 65 study.  
33  
34

35 66 **KEYWORDS** Medical students, career choice, meta-analysis  
36  
37  
38  
39  
40  
41  
42 69

## 70 Introduction

71 Because of the population aging, increased workload on doctors through increased  
72 number of consultations and in managing patients with multi-morbidity, the demand  
73 for physicians continues to increase; however, an imbalance in the supply of  
74 physicians in different subspecialties has become a growing concern in both  
75 developed and developing countries.<sup>1-5</sup> Some specialties and subspecialties, such as  
76 family medicine and palliative medicine,<sup>6,7</sup> are experiencing a desperate shortage of  
77 physicians, whereas other specialties and subspecialties, such as cardiology,  
78 ophthalmology and ear, nose and throat (ENT) surgery, require several years of  
79 training before admission due to intense competition.<sup>8,9</sup>

80 Specialty choice is the product of a complex interconnection of student expectation,  
81 department expectation, and competition for available spots, and student choice is  
82 where the choice begins.<sup>10</sup> Previous studies have suggested that medical students'  
83 choice of subspecialty is essential to the maintenance of an adequate medical  
84 workforce and a balanced development of the medical system.<sup>11,12</sup> However, the  
85 influencing factors underlying students' subspecialty choice have not been  
86 systemically reviewed. Recent changes in the training and practice environment may  
87 influence medical students' career choice.<sup>13</sup> Additionally, the variability in  
88 preferences over time and in students' attitudes towards career choices can further  
89 complicate this assessment. For example, a study in the UK indicated that half of the  
90 medical students made a definitive subspecialty choice during their first year of  
91 medical school.<sup>14</sup> However, students were prone to changing their subspecialty  
92 preference during medical school and internship.<sup>15</sup> Notably, students may also reject  
93 certain subspecialties during their medical school training, even those they have  
94 previously seriously considered.<sup>16</sup> Therefore, identifying the factors that influence

1  
2  
3 95 students' choice of subspecialty will enable a better understanding of the current  
4  
5 96 shortage/overload of physicians in specific fields and contribute to policy-building  
6  
7 97 and decision-making to improve the training and recruitment of students in the future.  
8  
9 98 We thus conducted a systematic review and a meta-analysis to investigate the  
10  
11 99 influencing factors and the extent of their influence on the choice of subspecialty  
12  
13 100 training among medical students. More specifically, we focused on the following  
14  
15 101 questions. First, can we gain a better understanding of students' preferences for  
16  
17 102 medical specialty according to the primary influencing factor? Second, do the  
18  
19 103 subgroups according to world region and survey years examined in this study differ  
20  
21 104 significantly with regard to the weight that students place on the identified  
22  
23 105 influencing factor?  
24  
25

## 26 106 **Methods**

27  
28  
29 107 We developed a review protocol (registration number: PROSPERO  
30  
31 108 CRD42017053781) prior to commencing the study. The Preferred Reporting Items  
32  
33 109 for Systematic Reviews and Meta-Analyses (PRISMA) guidelines was used to ensure  
34  
35 110 the reporting quality of this review (Fig. S1).<sup>17</sup>  
36  
37

### 38 111 **Search Strategy and Study Eligibility**

39  
40 112 We performed a literature search in June 2018 using the Cochrane Library, Medline,  
41  
42 113 Web of Science, CNKI and ERIC databases without language restrictions. Articles  
43  
44 114 were screened by title, abstract and reference list, and by correspondence with study  
45  
46 115 investigators. Potentially relevant papers were first identified by reviewing the titles  
47  
48 116 and abstracts, and the full text of each retrieved article was then assessed. A detailed  
49  
50 117 example of search strategy for Medline/PubMed is shown in **Methods S1**. Studies  
51  
52 118 were included if they reported data on medical students, were published in  
53  
54 119 peer-reviewed journals, and used a validated method to assess the extent of a factor's  
55  
56

1  
2  
3 120 influence on the choice of subspecialty, such as pediatric gastroenterology and  
4  
5 121 vascular surgery, or its corresponding specialty, such as pediatrics and surgery.  
6  
7 122 Because of the differences between medical education systems in the world, the  
8  
9 123 medical students we recruited includes the student in medical school, internship,  
10  
11 124 residency training and fellowship, containing the students who about to make a  
12  
13 125 specialty choice and students who has just made a specialty choice. A guide to  
14  
15 126 medical specialty, available at  
16  
17 <https://www.abms.org/member-boards/specialty-subspecialty-certificates/>, were used  
18  
19 127  
20 128 to identify the medical specialty and subspecialty of our research. We also conducted  
21  
22 129 an additional search using OpenGrey. However, no additional articles were further  
23  
24 130 included. All searches were performed using Google chrome (version 54.0.2840).

### 131 **Data Extraction and Quality Assessment**

132 The following information was independently extracted from each article by 2 trained  
133 investigators (Y.Y. and J.L.) using a standardized form: study design, geographic  
134 location, years of survey, journal, sample size, average age of the participants, the  
135 number and percentage of male participants, and the influencing factors and the  
136 extent of their influence. A third investigator was consulted if disagreements occurred.  
137 Each study may involve one or several influencing factors. An 11-item checklist  
138 which was recommended by Agency for Healthcare Research and Quality (AHRQ),  
139 used for cross-sectional studies, available at  
140 <https://www.ncbi.nlm.nih.gov/books/NBK35156/>, were used to assess the quality of  
141 the studies. All discrepancies were resolved via discussion and consensus.

### 142 **Statistical Analysis**

143 As considerable heterogeneity was expected because of the multiple sources of  
144 variances, a random effects meta-analysis model was used to estimate the influencing

1  
2  
3 145 factors and the extent of their influence.<sup>18</sup> Between-study heterogeneity was assessed  
4  
5 146 using the  $I^2$  statistic, which was calculated to describe the percentage of total  
6  
7 147 variation caused by heterogeneity across studies, with  $\geq 50\%$  indicating considerable  
8  
9 148 heterogeneity.<sup>19 20</sup> Potential sources of heterogeneity were identified using  
10  
11 149 meta-regression.<sup>21</sup> Subgroup analyses were performed for each factor in the studies in  
12  
13 150 developed countries vs. developing countries and studies conducted before 2010 vs.  
14  
15 151 after 2010. The EOI value of competencies in developing countries was not  
16  
17 152 statistically significant (81.21% [95% CI, 75.27%; 86.51%],  $P=0.1436$ ), and no  
18  
19 153 studies on the influence of student debt in developing countries were found. The  
20  
21 154 Q-test based on the analysis of variance was used to compare the subgroups, with a  
22  
23 155 significance threshold of 5%.<sup>22</sup> The influence of individual studies on the overall EOI  
24  
25 156 value was explored by serially excluding each study in a sensitivity analysis.  
26  
27 157 Publication bias was investigated using a funnel plot test and Egger's test.<sup>23 24</sup> All  
28  
29 158 analyses were performed using R (version 3.3.1, The R Foundation, Vienna, Austria).  
30  
31 159 The statistical tests were 2-sided with a significance threshold of  $P<0.05$ .

## 32 33 34 35 160 **Results**

### 36 37 38 161 **Study Characteristics**

39  
40 162 Seventy-five cross-sectional studies involving a total of 882,209 individuals that  
41  
42 163 published between January 1977 and May 2018 were included in the present research  
43  
44 164 **(Table 1)**. Thirty-four studies were conducted in North America, 24 in Europe, 7 in  
45  
46 165 Asia, 5 in Oceania, 3 in Africa, and 2 in South America. The median number of  
47  
48 166 participants per study was 243 (range 37-29,227). Fourteen studies included students  
49  
50 167 who had already selected subspecialties, whereas 61 did not. The influencing factors  
51  
52 168 were ranked according to the frequency of occurrence and each factor was identified  
53  
54 169 when at least 5 papers were available describing it. The influencing factors for

1  
2  
3 170 subspecialty choice were then classified according to 17 aspects, including academic  
4  
5 171 interests, controllable lifestyle or flexible work schedule (defined as flexibility that  
6  
7 172 allows physicians to control the number of hours devoted to practicing the specialty),  
8  
9 173 competencies, patient service orientation, medical teachers or mentors, career  
10  
11 174 opportunities, workload or working hours (characterized by the physician's time  
12  
13 175 spent on professional responsibilities), income, prestige, length of training, advice  
14  
15 176 from others (advice from family, friends, and other students), student debt,  
16  
17 177 experience with the subject, working environment, personality, gender and job  
18  
19 178 security. Personality and gender are common factors that affect the choice of  
20  
21 179 subspecialty among medical students, but most of the relevant literature has not  
22  
23 180 reported on the extent of these factors' influence. Moreover, the funnel plots were  
24  
25 181 clearly asymmetrical with regard to experience with the subject, the working  
26  
27 182 environment and job variety, indicating the existence of publication bias. Thus, the  
28  
29 183 analysis of the remaining 12 influencing factors were shown in this paper. Studies  
30  
31 184 assessed for influencing factors using questionnaires validated to medical students  
32  
33 185 asking the extent of certain factors the studies investigated. Quality assessment scores  
34  
35 186 for the included studies are listed in **Table 1**. None of the studies received a point for  
36  
37 187 the second AHRQ Quality Indicator, which requires studies to list the inclusion and  
38  
39 188 exclusion criteria for exposed and unexposed subjects (cases and controls) or refer to  
40  
41 189 previous publications, since no comparison studies were referenced in the analyzed  
42  
43 190 articles. For the remaining 10 criteria, 6 studies received 9 points, 8 studies received  
44  
45 191 8 points, 17 studies received 7 points, 33 studies received 6 points, 9 studies received  
46  
47 192 5 points and 2 studies received 4 points (scores for individual studies are presented in  
48  
49 193 **Table S1**).

#### 194 **Primary Analysis**



1  
2  
3 195 A meta-analysis was performed on the 12 influencing factors (**Table 2**): academic  
4  
5 196 interests (**Fig. S2**), competencies (**Fig. S3**), controllable lifestyle or flexible work  
6  
7 197 schedule (**Fig. S4**), patient service orientation (**Fig. S5**), medical teachers or mentors  
8  
9 198 (**Fig. S6**), career opportunities (**Fig. S7**), workload or working hours (**Fig. S8**),  
10  
11 199 income (**Fig. S9**), length of training (**Fig. S10**), prestige (**Fig. S11**), advice from  
12  
13 200 others (**Fig. S12**) and student debt (**Fig. S13**). All the factors were significant with  
14  
15 201 evidence of between-study heterogeneity ( $P < 0.0001$ ). A sensitivity analysis, in which  
16  
17 202 the meta-analysis was serially repeated after the exclusion of each study,  
18  
19 203 demonstrated that no individual study affected the overall extent of a factor's  
20  
21 204 influence.

#### 205 **Meta-regression and Subgroup Analysis**

206 Using common instructions when at least 5 studies were available and at least 2  
207 studies were in each comparator subgroup, four categorical covariates were identified  
208 as potential sources of heterogeneity by examining the studies conducted in the  
209 United States (US) vs. the studies conducted in other countries, the studies conducted  
210 before 2010 vs. those conducted after 2010, the studies concerning subspecialty only  
211 vs. those that were not specific to a subspecialty, and the studies with a sample size  
212  $< 200$  vs. the studies with a sample size  $\geq 200$  (**Table 3**). Some of the heterogeneities  
213 observed among the 12 factors can be partially explained by country, survey years,  
214 specialty and sample size.

215 EOI values were further analyzed by subgroup (**Table S2**) according to world region  
216 (**Fig. 1**) and survey year (**Fig. 2**). The EOI value of academic interests in developed  
217 countries was higher than that in developing countries (79.66% [95% CI, 70.73%;  
218 86.39% vs. 60.41% [95% CI, 43.44%; 75.19%];  $Q = 3.51$   $P = 0.02$ ). Conversely, a  
219 lower EOI value of prestige was found in studies conducted in developed countries

1  
2  
3 220 than in developing countries (23.96% [95% CI, 19.20%; 29.47%] vs. 47.65% [95%  
4  
5 221 CI, 34.41%; 61.24%];  $Q=4.71$   $P=0.01$ ). No statistically significant subgroup  
6  
7 222 differences in the EOI values of the other influencing factors were noted between  
8  
9 223 developed countries and developing countries. In addition, no statistically significant  
10  
11 224 differences in the EOI values of the influencing factors were observed when  
12  
13  
14 225 subgroup analysis was performed by survey year.

### 15 16 226 **Assessment of Publication Bias**

17  
18 227 We generated a funnel plot with proportion as the abscissa and standard error as the  
19  
20 228 ordinate. A visual inspection of the funnel plots revealed minimal asymmetry among  
21  
22 229 the various influencing factors (**Fig. S14**), and the results were concentrated in the  
23  
24 230 narrow upper part of the graph. However, there was evidence of small study effect in  
25  
26 231 the meta-analysis of “patient service orientation” (Egger’s test  $P=0.02$ ).

### 27 28 29 232 **Discussion**

#### 30 31 233 **Implications**

32  
33 234 This systematic review and meta-analysis involved 75 studies with 882,209 medical  
34  
35 235 students. Twelve influencing factors were analyzed. These factors can be classified  
36  
37 236 into two categories: economic factors and non-economic factors. We found that the  
38  
39 237 EOI of the economic factors, including income (34.70%) and student debt (15.33%),  
40  
41 238 may not depend on the region’s level of economic development. However, income  
42  
43 239 remained a major influencing factor in the process of choosing a specialty or  
44  
45 240 subspecialty. In the US, 15% of full-time family medicine physicians earned less than  
46  
47 241 \$100,000 in 2004, which is significantly less than the income earned by invasive  
48  
49 242 cardiologists (median income=\$427,815), neurosurgeons (median income=\$211,094),  
50  
51 243 and orthopedists (median income=\$335,646).<sup>25</sup> This economic inequality made  
52  
53 244 family medicine less attractive to medical school graduates.<sup>26</sup> Benefits such as health

1  
2  
3 245 insurance and tuition reimbursement have been shown to be the most common  
4  
5 246 economic incentives used to attract applicants.<sup>27</sup>  
6

7 247 The non-economic factors can be divided into individual factors, specialty-related  
8  
9 248 factors and others. First, individual factors, including academic interest and  
10  
11 249 competencies, have a considerable impact on students' subspecialty choice, with EOI  
12  
13 250 values of 75.29% and 55.15%, respectively. In addition, in the subgroup analysis,  
14  
15 251 although academic interests were less influential in developing countries than in  
16  
17 252 developed countries (79.66% [95% CI, 70.73%; 86.39% vs. 60.41% [95% CI,  
18  
19 253 43.44%; 75.19%];  $Q=3.51$   $P=0.02$ ), they were still the most influential of the 12  
20  
21 254 factors regardless of regional economic level. These findings indicate that  
22  
23 255 subspecialties with a shortage of manpower may attract more students by increasing  
24  
25 256 students' interests and improving the quality of education. Previous studies indicated  
26  
27 257 that early specialty exposure in medical education may arouse students' academic  
28  
29 258 interest and improve their clinical competence.<sup>26 28</sup> For example, an elective  
30  
31 259 extracurricular program designed to facilitate early contact with family medicine  
32  
33 260 physicians was found to significantly improve students' interest and clinical skills,  
34  
35 261 especially communication skills, in family medicine.<sup>29</sup> Furthermore, dispelling myths  
36  
37 262 and espousing the positive aspects of a discipline may provide a better understanding  
38  
39 263 of certain specialties; this approach could also be effective in increasing students'  
40  
41 264 academic interest.<sup>30</sup> For instance, family medicine is often considered a discipline  
42  
43 265 that requires less professional skills and knowledge. This misconception demotivates  
44  
45 266 students from choosing family medicine as their future career specialty, and this trend  
46  
47 267 may eventually lead to a shortage of family physicians.<sup>30</sup> Eliminating such prejudices  
48  
49 268 may help students pay greater attention to the areas in short supply and restore their  
50  
51 269 interests in other specialties.  
52  
53  
54  
55

1  
2  
3 270 Second, the specialty-related factors included controllable lifestyle/flexible work  
4  
5 271 schedule (EOI of 53.00%), career opportunities (EOI of 44.00%), workload (EOI of  
6  
7 272 37.99%) and training length (EOI of 32.30%). Of these factors, lifestyle varied  
8  
9 273 between different areas. Additionally, although certain specialties, such as general  
10  
11 274 surgery, seem to have an adequate number of surgeons on a per capita basis in the US,  
12  
13 275 there is still a poor geographic distribution within the surgical workforce according to  
14  
15 276 the type of surgical practice.<sup>31</sup> The inflexible lifestyle is a common reason that  
16  
17 277 students perceive surgery to be less attractive.<sup>31</sup> Reorganization of expected work  
18  
19 278 hours within shared practices and the increased use of physician extenders and  
20  
21 279 technologies such as electronic medical records may give physicians more flexibility  
22  
23 280 in work schedules.<sup>32</sup> Moreover, providing promotion opportunities and shortening the  
24  
25 281 length of training are possible strategies to recruit new staff in subspecialties that  
26  
27 282 require a long period of post-graduate residency training, such as neurosurgery.<sup>33</sup>  
28  
29  
30  
31 283 Finally, other factors such as service orientation (EOI of 50.74%), medical teachers  
32  
33 284 or mentors (EOI of 46.93%), prestige (EOI of 34.68%), and advice from others (EOI  
34  
35 285 of 28.24%) also contribute to the decision-making process of medical students. For  
36  
37 286 example, the desire to care for patients with end-stage diseases contributed to the  
38  
39 287 decision to enter palliative medicine in 86% of the medical students.<sup>7</sup> Additionally,  
40  
41 288 exposure to mentors in a particular clinical field such as internal medicine has been  
42  
43 289 strongly associated with medical students' choice of clinical field.<sup>34</sup> Moreover,  
44  
45 290 improving the occupational prestige of areas such as family medicine, pathology, and  
46  
47 291 radiology may help reshape the distribution of the workforce.<sup>28 35 36</sup>  
48  
49  
50  
51 292 In our study, several findings are especially noteworthy. First, interest was far more  
52  
53 293 important than income in deciding subspecialty. In our study, interest was the  
54  
55 294 top-ranked influencing factor (EOI of 75.29%) of subspecialty choice, while income

1  
2  
3 295 was ranked lower (EOI of 34.70%). This finding argues against the possible default  
4  
5 296 belief that raising physician's wages alone could solve the uneven distribution of  
6  
7 297 clinicians among subspecialties. Our findings highlight that cultivating and  
8  
9 298 stimulating students' professional interests may help improve the maldistribution of  
10  
11 299 medical resources in a more efficient and cost-saving manner.

12  
13 300 Second, improving abilities in a certain subspecialty of interest can greatly affect  
14  
15 301 medical students' professional choice. In our study, competencies ranked second in  
16  
17 302 influence, which may reflect the impact of admission conditions on students' choice  
18  
19 303 of subspecialty. Hence, to reduce the risk that students are restricted to the  
20  
21 304 subspecialty of their interest due to a lack of personal skills, medical education  
22  
23 305 should focus more on enhancing students' personal competencies in addition to their  
24  
25 306 academic interests.

26  
27  
28 307 Third, balancing medical resources is a complex process in practical terms, as the  
29  
30 308 influencing factors are not mutually exclusive. The shortage of physicians in certain  
31  
32 309 subspecialties may increase physician workload, resulting in less time for teaching.  
33  
34 310 Hence, the quality of teaching cannot be guaranteed, and students may tend to avoid  
35  
36 311 choosing these subspecialties, thus worsening the imbalance in the medical  
37  
38 312 workforce. Additionally, some of the 12 factors identified are not amenable to  
39  
40 313 practical interventions. For example, prestige cannot be immediately increased using  
41  
42 314 interventional strategies.<sup>35</sup> Overall, effective strategies must be multi-pronged and  
43  
44 315 incorporate several different aspects, and maldistribution in the workforce should not  
45  
46 316 be tackled through a simple adjustment of one influencing factor.

### 317 **Interpretations of the results of this meta-analysis**

318 Our meta-regression stratified by the study-level characteristics found that country,  
319 survey years, subspecialty and sample size may contribute to the heterogeneity

1  
2  
3 320 between studies. There was no significant difference in the sensitivity analysis, which  
4  
5 321 indicated that the results of the meta-analysis were convincing. The funnel plots and  
6  
7 322 Egger's tests revealed that most of the publication bias was small ( $P>0.05$ ), except  
8  
9 323 for the meta-analysis of "patient service orientation". Moreover, the majority of the  
10  
11 324 studies collected in the database were from developed countries rather than  
12  
13  
14 325 developing countries.

### 15 16 326 **Limitations**

17  
18 327 Several limitations should be considered when interpreting the findings of this study.  
19  
20 328 First, the students involved in our study included medical students at different stages  
21  
22 329 of their medical education. Students' perception about different subspecialties may  
23  
24 330 change during medical training until the students applies for specialty training. For  
25  
26 331 example, compared to an intern, a freshman student may place greater emphasis on  
27  
28 332 income and prestige when considering a career choice.<sup>37</sup> A subgroup analysis  
29  
30 333 stratified by the stages of medical education and a secondary meta-analysis of  
31  
32 334 longitudinal studies may better reflect changes in influencing factors and the extent  
33  
34 335 of their influence over time. Second, our meta-analysis summarized the data from  
35  
36 336 different geographic regions around the world, and the general conclusions may not  
37  
38 337 be appropriate to guide policy development in each region. Enhanced effort is needed  
39  
40 338 to develop specific intervention strategies according to the specific economic level,  
41  
42 339 religious beliefs, healthcare system, educational system and endemic diseases of  
43  
44 340 different countries and regions. Subgroup analysis stratified by organizational and  
45  
46 341 medical training factors would provide more information of the factors influencing  
47  
48 342 subspecialty choice among medical students. Third, the surveys in the various studies  
49  
50 343 were also conducted using different methods. Most of the questionnaires used a  
51  
52 344 Likert scale. Therefore, when we converted the results to a percentage representing

1  
2  
3 345 the extent of a factor's influence, the Likert scale items were treated as interval  
4  
5 346 data.<sup>38-40</sup> Consequently, there may have been differences in the conversion process.  
6  
7 347 Finally, the analysis relied on aggregated published data. A multicenter prospective  
8  
9 348 study would provide more accurate estimate of the influencing factors and the extent  
10  
11 349 of their influence on medical students' choice of subspecialty.

### 13 350 **Conclusion**

14  
15  
16 351 In conclusion, this systematic review and meta-analysis provided a summary  
17  
18 352 evaluation of 12 influencing factors and the extent of their influence on the choice of  
19  
20 353 subspecialty training among medical students. Understanding students' attitudes  
21  
22 354 toward their subspecialty decision-making process could provide the basis for  
23  
24 355 developing strategies to increase the attractiveness of subspecialties experiencing a  
25  
26 356 shortage of manpower, thereby balancing the distribution of medical recourses.  
27  
28  
29  
30  
31  
32  
33  
34  
35  
36  
37  
38  
39  
40  
41  
42  
43  
44  
45  
46  
47  
48  
49  
50  
51  
52  
53  
54  
55  
56  
57  
58  
59  
60

1  
2  
3 357 **Contributors:** Haotian Lin contributed to the conceptualizing and design of the study,  
4  
5 358 and to research funding, coordinated the research and oversaw the project. Yahan  
6  
7 359 Yang, Jiawei Li and Xiaohang Wu contributed to data collection and interpretation,  
8  
9 360 and to data analysis. Jinghui Wang, Yi Zhu, Chuan Chen and Wangting Li contributed  
10  
11 361 to the design of the study. All authors contributed to the drafting and revision of the  
12  
13 362 paper and approved the final manuscript for publication. No patients or the public  
14  
15 363 were involved in the development and design of this research.

16  
17  
18 364 **Funding:** The principal investigator of this study (Haotian Lin) is currently  
19  
20 365 supported by National key R & D project (2018YFC010302), the Key Research Plan  
21  
22 366 for the National Natural Science Foundation of China Cultivation Project (91546101),  
23  
24 367 the National Natural Science Foundation of China (81770967), the Fundamental  
25  
26 368 Research Funds for the Central Universities (16ykjc28), the Guangdong Provincial  
27  
28 369 Natural Science Foundation for Distinguished Young Scholars of China  
29  
30 370 (2014A030306030), the Guangdong Province Universities and Colleges Youth Pearl  
31  
32 371 River Scholar Funded Scheme (2016), the Clinical Research and Translational  
33  
34 372 Medical Center of Pediatric Cataract in Guangzhou City (201505032017516), and  
35  
36 373 Ministry of Science and Technology of China Grants (2015CB964600). These  
37  
38 374 sponsors and funding organizations had no role in the design or performance of this  
39  
40 375 study.

41  
42  
43  
44 376 **Competing Interests:** The authors declare no competing financial interests.

45  
46 377 **Data sharing:** No additional data available.

47  
48 378 **Patient and public involvement:** Patients and the public were not involved in  
49  
50 379 development of the research question and outcome measures, nor the study design.  
51  
52 380 The study does not involve patient recruitment, and patients were not involved in  
53  
54  
55  
56  
57  
58  
59  
60



1  
2  
3 381 conduct of the study. We plan to liaise closely with patients, special interest groups,  
4  
5 382 and charities in the dissemination of our results in printed and electronic media.  
6

7 383 **References**

- 8 384 1. Zurn P, Dal Poz MR, Stilwell B, et al. Imbalance in the health workforce. *Hum Resour Health*  
9 385 2004;2(1):13. doi: 10.1186/1478-4491-2-13
- 10 386 2. Diallo K, Zurn P, Gupta N, et al. Monitoring and evaluation of human resources for health: an  
11 387 international perspective. *Hum Resour Health* 2003;1(1):3. doi: 10.1186/1478-4491-1-3
- 12 388 3. Anderson GF, Hussey PS. Population aging: A comparison among industrialized countries. *Health*  
13 389 *Affair* 2000;19(3):191-203. doi: DOI 10.1377/hlthaff.19.3.191
- 14 390 4. Hobbs FDR, Bankhead C, Mukhtar T, et al. Clinical workload in UK primary care: a retrospective  
15 391 analysis of 100 million consultations in England, 2007-14. *Lancet* 2016;387(10035):2323-30.  
16 392 doi: 10.1016/S0140-6736(16)00620-6
- 17 393 5. Reeve J, Blakeman T, Freeman GK, et al. Generalist solutions to complex problems: generating  
18 394 practice-based evidence - the example of managing multi-morbidity. *Bmc Fam Pract* 2013;14  
19 395 doi: Artn 112  
20 396 10.1186/1471-2296-14-112
- 21 397 6. Bodenheimer T. Primary care--will it survive? *N Engl J Med* 2006;355(9):861-4. doi:  
22 398 10.1056/NEJMp068155
- 23 399 7. LeGrand SB, Heintz JB. Palliative Medicine Fellowship: A Study of Resident Choices. *Journal of*  
24 400 *Pain and Symptom Management* 2012;43(3):558-68. doi:  
25 401 10.1016/j.jpainsymman.2011.04.018
- 26 402 8. Kim YY, Kim UN, Kim YS, et al. Factors associated with the specialty choice of Korean medical  
27 403 students: a cross-sectional survey. *Human Resources for Health* 2016;14:8. doi:  
28 404 10.1186/s12960-016-0141-8
- 29 405 9. McNally SA. Competition ratios for different specialties and the effect of gender and immigration  
30 406 status. *J R Soc Med* 2008;101(10):489-92. doi: 10.1258/jrsm.2008.070284
- 31 407 10. Reed VA, Jernstedt GC, Reber ES. Understanding and improving medical student specialty choice:  
32 408 a synthesis of the literature using decision theory as a referent. *Teach Learn Med*  
33 409 2001;13(2):117-29. doi: 10.1207/S15328015TLM1302\_7
- 34 410 11. Al-Ansari SS, Khafagy MA. FACTORS AFFECTING THE CHOICE OF HEALTH SPECIALTY  
35 411 BY MEDICAL GRADUATES. *Journal of Family & Community Medicine*  
36 412 2015;13(3):119-23.
- 37 413 12. Leduc N, Vanasse A, Scott I, et al. The career decision-making process of medical students and  
38 414 residents and the choice of specialty and practice location: how does Postgraduate Medical  
39 415 Education fit in? 2011
- 40 416 13. Delamothe T. Modernising Medical Careers: final report. *BMJ* 2008;336(7635):54-55.
- 41 417 14. Goldacre MJ, Laxton L, Harrison EM, et al. Early career choices and successful career progression  
42 418 in surgery in the UK: prospective cohort studies. *Bmc Surgery* 2010;10:11. doi:  
43 419 10.1186/1471-2482-10-32
- 44 420 15. Weissman C, Zisk-Rony RY, Schroeder JE, et al. Medical specialty considerations by medical  
45 421 students early in their clinical experience. *Isr J Health Policy Res* 2012;1(1):13. doi:  
46 422 10.1186/2045-4015-1-13
- 47 423 16. Jackson C, Ball J, Hirsh W, et al. Informing choices: the need for career advice in medical training.  
48 424 *Cambridge: National institute for careers Education and Counseling* 2003
- 49 425 17. Moher D, Liberati A, Tetzlaff J, et al. Preferred reporting items for systematic reviews and  
50 426 meta-analyses: the PRISMA statement. *J Clin Epidemiol* 2009;62(10):1006-12. doi:  
51 427 10.1016/j.jclinepi.2009.06.005
- 52 428 18. Borenstein M, Hedges LV, Higgins JP, et al. A basic introduction to fixed-effect and random-effects  
53 429 models for meta-analysis. *Res Synth Methods* 2010;1(2):97-111. doi: 10.1002/jrsm.12
- 54 430 19. Higgins JP, Thompson SG, Deeks JJ, et al. Measuring inconsistency in meta-analyses. *BMJ*  
55 431 2003;327(7414):557-60. doi: 10.1136/bmj.327.7414.557
- 56 432 20. Higgins JP, Thompson SG. Quantifying heterogeneity in a meta-analysis. *Stat Med*  
57 433 2002;21(11):1539-58. doi: 10.1002/sim.1186
- 58 434 21. Sterne JA, Juni P, Schulz KF, et al. Statistical methods for assessing the influence of study  
59 435 characteristics on treatment effects in 'meta-epidemiological' research. *Stat Med*  
60 436 2002;21(11):1513-24. doi: 10.1002/sim.1184

- 1  
2  
3 437 22. Borenstein M, Hedges LV, Higgins J, et al. Criticisms of meta - analysis. *Introduction to*  
4 438 *meta-analysis* 2009:377-87.
- 5 439 23. Egger M, Davey Smith G, Schneider M, et al. Bias in meta-analysis detected by a simple,  
6 440 graphical test. *BMJ* 1997;315(7109):629-34.
- 7 441 24. Sterne JA, Egger M. Funnel plots for detecting bias in meta-analysis: guidelines on choice of axis.  
8 442 *J Clin Epidemiol* 2001;54(10):1046-55.
- 9 443 25. Bodenheimer T, Berenson RA, Rudolf P. The primary care-specialty income gap: why it matters.  
10 444 *Annals of internal medicine* 2007;146(4):301-6.
- 11 445 26. Bodenheimer T, Pham HH. Primary care: current problems and proposed solutions. *Health Aff*  
12 446 *(Millwood)* 2010;29(5):799-805. doi: 10.1377/hlthaff.2010.0026
- 13 447 27. Association AH. The hospital workforce shortage: Immediate and future. *Trend Watch*  
14 448 2001;3(2):1-8.
- 15 449 28. Compton MT, Frank E, Elon L, et al. Changes in US medical students' specialty interests over the  
16 450 course of medical school. *Journal of General Internal Medicine* 2008;23(7):1095-100. doi:  
17 451 10.1007/s11606-008-0579-z
- 18 452 29. Indyk D, Deen D, Fornari A, et al. The influence of longitudinal mentoring on medical student  
19 453 selection of primary care residencies. *BMC medical education* 2011;11(1):27.
- 20 454 30. Gill H, McLeod S, Duerksen K, et al. Factors influencing medical students' choice of family  
21 455 medicine Effects of rural versus urban background. *Canadian Family Physician*  
22 456 2012;58(11):E649-E57.
- 23 457 31. Richardson JD. Workforce and lifestyle issues in general surgery training and practice. *Archives of*  
24 458 *surgery (Chicago, Ill. : 1960)* 2002;137(5):515-20.
- 25 459 32. Newton DA, Grayson MS, Thompson LF. The variable influence of lifestyle and income on  
26 460 medical students' career specialty choices: data from two U.S. medical schools, 1998-2004.  
27 461 *Academic medicine : journal of the Association of American Medical Colleges*  
28 462 2005;80(9):809-14.
- 29 463 33. Orrico K. Ensuring an adequate neurosurgical workforce for 21st century. *Surgeons AAoN* 2012
- 30 464 34. Wright SM, Wong A, Newill CA. The impact of role models on medical students. *Journal of*  
31 465 *General Internal Medicine* 1997;12(1):53-56.
- 32 466 35. Glazer GM, Ruiz-Wibbelsmann JA. Decades of perceived mediocrity: prestige and radiology.  
33 467 *Radiology* 2011;260(2):311-16.
- 34 468 36. Schwartzbaum AM, McGrath JH, Rothman RA. The perception of prestige differences among  
35 469 medical subspecialties. *Soc Sci Med* 1973;7(5):365-71.
- 36 470 37. Parsa S, Aghazadeh A, Nejatiasafa AA, et al. Freshmen versus Interns' Specialty Interests. *Archives*  
37 471 *of Iranian Medicine* 2010;13(6):509-15.
- 38 472 38. Komorita SS. Attitude Content, Intensity, and the Neutral Point on a Likert Scale. *J Soc Psychol*  
39 473 1963;61:327-34. doi: 10.1080/00224545.1963.9919489
- 40 474 39. Baggaley AR, Hull AL. The effect of nonlinear transformations on a Likert scale. *Eval Health Prof*  
41 475 1983;6(4):483-91.
- 42 476 40. Norman G. Likert scales, levels of measurement and the "laws" of statistics. *Advances in health*  
43 477 *sciences education : theory and practice* 2010;15(5):625-32. doi:  
44 478 10.1007/s10459-010-9222-y
- 45 479 41. Smith F, Lambert TW, Goldacre MJ. Factors influencing junior doctors' choices of future specialty:  
46 480 trends over time and demographics based on results from UK national surveys. *Journal of the*  
47 481 *Royal Society of Medicine* 2015;108(10):396-405. doi: 10.1177/0141076815599674
- 48 482 42. Cochran A, Melby S, Neumayer LA. An Internet-based survey of factors influencing medical  
49 483 student selection of a general surgery career. *American Journal of Surgery*  
50 484 2005;189(6):742-46. doi: 10.1016/j.amjsurg.2005.03.019
- 51 485 43. Hauer KE, Durning SJ, Kernan WN, et al. Factors associated with medical students' career choices  
52 486 regarding internal medicine. *Jama-Journal of the American Medical Association*  
53 487 2008;300(10):1154-64. doi: 10.1001/jama.300.10.1154
- 54 488 44. Johnson AL, Sharma J, Chinchilli VM, et al. Why do medical students choose orthopaedics as a  
55 489 career? *The Journal of bone and joint surgery American volume* 2012;94(11):e78. doi:  
56 490 10.2106/jbjs.k.00826 [published Online First: 2012/05/29]
- 57 491 45. Kiolbassa K, Miksch A, Hermann K, et al. Becoming a general practitioner - Which factors have  
58 492 most impact on career choice of medical students? *Bmc Family Practice* 2011;12:7. doi:  
59 493 10.1186/1471-2296-12-25
- 60 494 46. Klingensmith ME, Cogbill TH, Luchette F, et al. Factors Influencing the Decision of Surgery  
55 495 Residency Graduates to Pursue General Surgery Practice Versus Fellowship. *Annals of*

- 1  
2  
3 496 *Surgery* 2015;262(3):449-55. doi: 10.1097/sla.0000000000001435
- 4 497 47. Lee JY, Kerbl DC, McDougall EM, et al. Medical Students Pursuing Surgical Fields Have No  
498 Greater Innate Motor Dexterity than Those Pursuing Nonsurgical Fields. *Journal of Surgical*  
499 *Education* 2012;69(3):360-63. doi: 10.1016/j.jsurg.2011.11.005
- 500 48. Macdonald C, Cawood T. Factors influencing career decisions in internal medicine. *Internal*  
501 *Medicine Journal* 2012;42(8):918-23. doi: 10.1111/j.1445-5994.2012.02793.x
- 502 49. Paiva RE, Vu NV, Verhulst SJ. The effect of clinical experiences in medical school on specialty  
503 choice decisions. *J Med Educ* 1982;57(9):666-74.
- 504 50. Ni Chroinin D, Cronin E, Cullen W, et al. Would you be a geriatrician? Student career preferences  
505 and attitudes to a career in geriatric medicine. *Age Ageing* 2013;42(5):654-7. doi:  
506 10.1093/ageing/aft093 [published Online First: 2013/08/07]
- 507 51. Rogers LQ, Fincher RM, Lewis LA. Factors influencing medical students to choose primary care  
508 or non-primary care specialties. *Academic medicine : journal of the Association of American*  
509 *Medical Colleges* 1990;65(9 Suppl):S47-8.
- 510 52. Abendroth J, Schnell U, Lichte T, et al. Motives of former interns in general practice for  
511 speciality-choice--results of a cross-sectional study among graduates 2007 to 2012. *GMS*  
512 *Zeitschrift für medizinische Ausbildung* 2014;31(1):Doc11. doi: 10.3205/zma000903  
513 [published Online First: 2014/02/28]
- 514 53. Alawad A, Khan WS, Abdelrazig YM, et al. Factors considered by undergraduate medical students  
515 when selecting specialty of their future careers. *Pan African Medical Journal* 2015;20:6. doi:  
516 10.11604/pamj.2015.20.102.4715
- 517 54. Azizzadeh A, McCollum CH, Miller CC, 3rd, et al. Factors influencing career choice among  
518 medical students interested in surgery. *Curr Surg* 2003;60(2):210-3. doi:  
519 10.1016/s0149-7944(02)00679-7 [published Online First: 2004/02/20]
- 520 55. Celenza A, Bharath J, Scop J. Improving the attractiveness of an emergency medicine career to  
521 medical students: An exploratory study. *Emergency Medicine Australasia* 2012;24(6):625-33.  
522 doi: 10.1111/j.1742-6723.2012.01607.x
- 523 56. Dolan-Evans E, Rogers GD. Barriers for students pursuing a surgical career and where the Surgical  
524 Interest Association can intervene. *Anz Journal of Surgery* 2014;84(6):406-11. doi:  
525 10.1111/ans.12521
- 526 57. Boyd JS, Clyne B, Reinert SE, et al. Emergency Medicine Career Choice: A Profile of Factors and  
527 Influences from the Association of American Medical Colleges (AAMC) Graduation  
528 Questionnaires. *Academic Emergency Medicine* 2009;16(6):544-49. doi:  
529 10.1111/j.1553-2712.2009.00385.x
- 530 58. Egerton EA. Choice of career of doctors who graduated from Queen's University, Belfast in 1977.  
531 *Med Educ* 1985;19(2):131-7.
- 532 59. Diderichsen S, Johansson EE, Verdonk P, et al. Few gender differences in specialty preferences and  
533 motivational factors: a cross-sectional Swedish study on last-year medical students. *Bmc*  
534 *Medical Education* 2013;13:8. doi: 10.1186/1472-6920-13-39
- 535 60. Ferrari S, Reggianini C, Mattei G, et al. International Study of Student Career Choice in Psychiatry  
536 (ISoSCCIP): Results from Modena, Italy. *International Review of Psychiatry*  
537 2013;25(4):450-59. doi: 10.3109/09540261.2013.804402
- 538 61. Freire MDM, Jordao LMR, Ferreira ND, et al. Motivation Towards Career Choice of Brazilian  
539 Freshman Students in a Fifteen-Year Period. *Journal of Dental Education* 2011;75(1):115-21.
- 540 62. Buddeberg-Fischer B, Klaghofer R, Abel T, et al. Swiss residents' speciality choices--impact of  
541 gender, personality traits, career motivation and life goals. *BMC Health Serv Res* 2006;6:137.  
542 doi: 10.1186/1472-6963-6-137
- 543 63. Dorsey ER, Jarjoura D, Rutecki GW. The influence of controllable lifestyle and sex on the  
544 specialty choices of graduating U.S. medical students, 1996-2003. *Academic medicine :*  
545 *journal of the Association of American Medical Colleges* 2005;80(9):791-6. [published  
546 Online First: 2005/08/27]
- 547 64. Ekenze SO, Ugwumba FO, Obi UM, et al. Undergraduate Surgery Clerkship and the Choice of  
548 Surgery as a Career: Perspective from a Developing Country. *World Journal of Surgery*  
549 2013;37(9):2094-100. doi: 10.1007/s00268-013-2073-y
- 550 65. Barikani A, Afaghi M, Barikani F, et al. Perception of the medical students on their future career in  
551 Qazvin University of Medical Sciences. *Global journal of health science* 2012;4(4):176-80.  
552 doi: 10.5539/gjhs.v4n4p176 [published Online First: 2012/09/18]
- 553 66. Bittaye M, Odukogbe AT, Nyan O, et al. Medical students' choices of specialty in The Gambia: the  
554 need for career counseling. *BMC Med Educ* 2012;12:72. doi: 10.1186/1472-6920-12-72

- 1  
2  
3 555 67. Bonura EM, Lee ES, Ramsey K, et al. Factors Influencing Internal Medicine Resident Choice of  
4 556 Infectious Diseases or Other Specialties: A National Cross-sectional Study. *Clinical Infectious*  
5 557 *Diseases* 2016;63(2):155-63. doi: 10.1093/cid/ciw263
- 6 558 68. Al-Fouzan R, Al-Ajlan S, Marwan Y, et al. Factors affecting future specialty choice among medical  
7 559 students in Kuwait. *Medical Education Online* 2012;17:7. doi: 10.3402/meo.v17i0.19587
- 8 560 69. AlKot MM, Gouda MA, KhalafAllah MT, et al. Family Medicine in Egypt From Medical Students'  
9 561 Perspective: A Nationwide Survey. *Teaching and Learning in Medicine* 2015;27(3):264-73.  
10 562 doi: 10.1080/10401334.2015.1044654
- 11 563 70. Borges NJ, Manuel RS, Duffy RD, et al. Influences on specialty choice for students entering  
12 564 person-oriented and technique-oriented specialties. *Medical Teacher* 2009;31(12):1086-88.  
13 565 doi: 10.3109/01421590903183787
- 14 566 71. Budd S, Kelley R, Day R, et al. Student attitudes to psychiatry and their clinical placements.  
15 567 *Medical Teacher* 2011;33(11):E586-E92. doi: 10.3109/0142159x.2011.610836
- 16 568 72. Corrigan MA, Shields CJ, Redmond HP. Factors influencing surgical career choices and  
17 569 advancement in Ireland and Britain. *World Journal of Surgery* 2007;31(10):1921-29. doi:  
18 570 10.1007/s00268-007-9175-3
- 19 571 73. Davis CR, Trevatt AEJ, McGoldrick RB, et al. How to train plastic surgeons of the future. *Journal*  
20 572 *of Plastic Reconstructive and Aesthetic Surgery* 2016;69(8):1134-40. doi:  
21 573 10.1016/j.bjps.2016.05.001
- 22 574 74. Deutsch T, Lippmann S, Frese T, et al. Who wants to become a general practitioner? Student and  
23 575 curriculum factors associated with choosing a GP career - a multivariable analysis with  
24 576 particular consideration of practice-orientated GP courses. *Scandinavian Journal of Primary*  
25 577 *Health Care* 2015;33(1):47-53. doi: 10.3109/02813432.2015.1020661
- 26 578 75. Gardner SP, Roberts-Thomson KF. The effect of a change in selection procedures on students'  
27 579 motivation to study dentistry. *Australian Dental Journal* 2014;59(1):2-8. doi:  
28 580 10.1111/adj.12141
- 29 581 76. Dias MS, Sussman JS, Durham S, et al. Perceived benefits and barriers to a career in pediatric  
30 582 neurosurgery: a survey of neurosurgical residents Clinical article. *Journal of*  
31 583 *Neurosurgery-Pediatrics* 2013;12(5):422-33. doi: 10.3171/2013.5.peds12597
- 32 584 77. Goltz CJ, Bachusz RC, Mancini E, et al. Medical Student Career Survey-Vascular Surgery  
33 585 Awareness Initiative. *Annals of Vascular Surgery* 2013;27(2):225-31. doi:  
34 586 10.1016/j.avsg.2012.02.012
- 35 587 78. Gupta NB, Khadilkar SV, Bangar SS, et al. Neurology as career option among postgraduate  
36 588 medical students. *Annals of Indian Academy of Neurology* 2013;16(4):478-82. doi:  
37 589 10.4103/0972-2327.120427
- 38 590 79. Hanzlick R, Prahlow JA, Denton S, et al. Selecting forensic pathology as a career - A survey of the  
39 591 post with an eye on the future. *American Journal of Forensic Medicine and Pathology*  
40 592 2008;29(2):114-22. doi: 10.1097/PAF.0b013e318174f0a9
- 41 593 80. Harris MC, Marx J, Gallagher PR, et al. General vs subspecialty pediatrics - Factors leading to  
42 594 residents' career decisions over a 12-year period. *Archives of Pediatrics & Adolescent*  
43 595 *Medicine* 2005;159(3):212-16. doi: 10.1001/archpedi.159.3.212
- 44 596 81. Hauer KE, Fagan MJ, Kernan W, et al. Internal medicine clerkship directors' perceptions about  
45 597 student interest in internal medicine careers. *Journal of General Internal Medicine*  
46 598 2008;23(7):1101-04. doi: 10.1007/s11606-008-0640-y
- 47 599 82. Labiris G, Vamvakerou V, Tsolakaki O, et al. Perceptions of Greek medical students regarding  
48 600 medical profession and the specialty selection process during the economic crisis years.  
49 601 *Health Policy* 2014;117(2):203-09. doi: 10.1016/j.healthpol.2014.04.009
- 50 602 83. Lambert TW, Goldacre MJ, Bron AJ. Career choices for ophthalmology made by newly qualified  
51 603 doctors in the United Kingdom, 1974-2005. *Bmc Ophthalmology* 2008;8:9. doi:  
52 604 10.1186/1471-2415-8-3
- 53 605 84. Shah HH, Jhaveri KD, Sparks MA, et al. Career Choice Selection and Satisfaction among US  
54 606 Adult Nephrology Fellows. *Clinical Journal of the American Society of Nephrology*  
55 607 2012;7(9):1513-20. doi: 10.2215/cjn.01620212
- 56 608 85. Lefevre JH, Roupert M, Kerneis S, et al. Career choices of medical students: a national survey of  
57 609 1780 students. *Medical Education* 2010;44(6):603-12. doi:  
58 610 10.1111/j.1365-2923.2010.03707.x
- 59 611 86. Vicente B, Rosel L. Challenges for psychiatric recruitment and training in Chile. *International*  
60 612 *Review of Psychiatry* 2013;25(4):413-18. doi: 10.3109/09540261.2013.822348
- 61 613 87. Wiesenfeld L, Abbey S, Takahashi SG, et al. Choosing Psychiatry as a Career: Motivators and

- 1  
2  
3 614 Deterrents at a Critical Decision-Making Juncture. *Canadian Journal of Psychiatry-Revue*  
4 615 *Canadienne De Psychiatrie* 2014;59(8):450-54.
- 5 616 88. Lam CYY, Cheung CSY, Hui ASY. Factors influencing the career interest of medical graduates in  
6 617 obstetrics and gynaecology in Hong Kong: a cross-sectional questionnaire survey. *Hong Kong*  
7 618 *Medical Journal* 2016;22(2):138-43.
- 8 619 89. Hartung PJ, Taber BJ, Richard GV. The physician values in practice scale: Construction and initial  
9 620 validation. *Journal of Vocational Behavior* 2005;67(2):309-20. doi:  
10.1016/j.jvb.2004.05.008
- 10 622 90. Girasek E, Molnar R, Eke E, et al. The medical career choice motivations - Results from a  
11 623 Hungarian study. *Central European Journal of Medicine* 2011;6(4):502-09. doi:  
12 624 10.2478/s11536-011-0034-0
- 13 625 91. Zuccato JA, Kulkarni AV. The Impact of Early Medical School Surgical Exposure on Interest in  
14 626 Neurosurgery. *Canadian Journal of Neurological Sciences* 2016;43(3):410-16. doi:  
15 627 10.1017/cjn.2015.332
- 16 628 92. Wilbanks L, Spollen J, Messias E. Factors Influencing Medical School Graduates Toward a Career  
17 629 in Psychiatry: Analysis from the 2011-2013 Association of American Medical Colleges  
18 630 Graduation Questionnaire. *Academic Psychiatry* 2016;40(2):255-60. doi:  
19 631 10.1007/s40596-015-0287-z
- 20 632 93. West CP, Drefahl MM, Popkave C, et al. Internal Medicine Resident Self-report of Factors  
21 633 Associated with Career Decisions. *Journal of General Internal Medicine* 2009;24(8):946-49.  
22 634 doi: 10.1007/s11606-009-1039-0
- 23 635 94. Watmough S, Taylor D, Ryland I. Using questionnaires to determine whether medical graduates'  
24 636 career choice is determined by undergraduate or postgraduate experiences. *Medical Teacher*  
25 637 2007;29(8):830-32. doi: 10.1080/01421590701551755
- 26 638 95. Thakur A, Fedorka P, Ko C, et al. Impact of mentor guidance in surgical career selection. *Journal*  
27 639 *of Pediatric Surgery* 2001;36(12):1802-04. doi: 10.1053/jpsu.2001.28842
- 28 640 96. Scott I, Gowans M, Wright B, et al. Determinants of choosing a career in surgery. *Medical Teacher*  
29 641 2011;33(12):1011-17. doi: 10.3109/0142159x.2011.558533
- 30 642 97. Schnuth RL, Vasilenko P, Mavis B, et al. What influences medical students to pursue careers in  
31 643 obstetrics and gynecology? *American Journal of Obstetrics and Gynecology*  
32 644 2003;189(3):639-43. doi: 10.1067/s0002-9378(03)00886-x
- 33 645 98. Richards JMJ, Drummond R, Murray J, et al. WHAT PROPORTION OF BASIC SURGICAL  
34 646 TRAINEES CONTINUE IN A SURGICAL CAREER? A SURVEY OF THE FACTORS  
35 647 WHICH ARE IMPORTANT IN INFLUENCING CAREER DECISIONS. *Surgeon-Journal*  
36 648 *of the Royal Colleges of Surgeons of Edinburgh and Ireland* 2009;7(5):270-75.
- 37 649 99. Reed CE, Vaporciyan AA, Erikson C, et al. Factors Dominating Choice of Surgical Specialty.  
38 650 *Journal of the American College of Surgeons* 2010;210(3):319-24. doi:  
39 651 10.1016/j.jamcollsurg.2009.11.016
- 40 652 100. de Souza LCL, Mendonca VRR, Garcia GBC, et al. Medical Specialty Choice and Related  
41 653 Factors of Brazilian Medical Students and Recent Doctors. *Plos One* 2015;10(7):15. doi:  
42 654 10.1371/journal.pone.0133585
- 43 655 101. Pikoulis E, Avgerinos ED, Pedeli X, et al. Medical students' perceptions on factors influencing a  
44 656 surgical career: The fate of general surgery in Greece. *Surgery* 2010;148(3):510-15. doi:  
45 657 10.1016/j.surg.2010.01.013
- 46 658 102. Ozer U, Ceri V, Carpar E, et al. Factors Affecting the Choice of Psychiatry as a Specialty and  
47 659 Satisfaction among Turkish Psychiatry Residents. *Academic Psychiatry* 2016;40(2):299-303.  
48 660 doi: 10.1007/s40596-015-0346-5
- 49 661 103. Noble J, Hechter FJ, Karaikos N, et al. Motivational factors and future life plans of orthodontic  
50 662 residents in the United States. *American Journal of Orthodontics and Dentofacial*  
51 663 *Orthopedics* 2010;137(5):623-30. doi: 10.1016/j.ajodo.2008.03.034
- 52 664 104. Noble J. Factors influencing career choice in ophthalmology. *Canadian Journal of*  
53 665 *Ophthalmology-Journal Canadien D Ophthalmologie* 2006;41(5):596-99.
- 54 666 105. Newton DA, Grayson MS, Thompson LF. The variable influence of lifestyle and income on  
55 667 medical students' career specialty choices: Data from two US medical schools, 1998-2004.  
56 668 *Academic Medicine* 2005;80(9):809-14. doi: 10.1097/00001888-200509000-00005
- 57 669 106. Moore HB, Moore PK, Grant AR, et al. Future of acute care surgery: A perspective from the next  
58 670 generation. *Journal of Trauma and Acute Care Surgery* 2012;72(1):94-99. doi:  
59 671 10.1097/TA.0b013e31823b990a
- 60 672 107. Momen AA, Shakurnia A. Factors Influencing Pediatric Specialty Choice among Pediatric

- 1  
2  
3 673 Residents of Ahvaz Jundishapur University of Medical Sciences. *International Journal of*  
4 674 *Pediatrics-Mashhad* 2015;3(3):701-06.  
5 675 108. Mehmood SI, Kumar A, Al-Binali A, et al. Specialty preferences: Trends and perceptions among  
6 676 Saudi undergraduate medical students. *Medical Teacher* 2012;34:S51-S60. doi:  
7 677 10.3109/0142159x.2012.656753  
8 678 109. Lorient Y, Albiges-Sauvin L, Dionysopoulos D, et al. Why do residents choose the medical  
9 679 oncology specialty? Implications for future recruitment-results of the 2007 French  
10 680 Association of Residents in Oncology (AERIO) Survey. *Annals of Oncology*  
11 681 2010;21(1):161-65. doi: 10.1093/annonc/mdp294  
12 682 110. Lefevre JH, Karila L, Kerneis S, et al. Motivation of French medical students to pursue surgical  
13 683 careers: Results of national survey of 1742 students. *Journal of Visceral Surgery*  
14 684 2010;147(3):E181-E86. doi: 10.1016/j.jvisc Surg.2010.08.004  
15 685 111. Vo A, McLean L, McInnes MDF. Medical specialty preferences in early medical school training  
16 686 in Canada. *Int J Med Educ* 2017;8:400-07. doi: 10.5116/ijme.59f4.3c15  
17 687 112. Grasreiner D, Dahmen U, Settmacher U. Specialty preferences and influencing factors: a repeated  
18 688 cross-sectional survey of first- to sixth-year medical students in Jena, Germany. *BMC medical*  
19 689 *education* 2018;18 doi: ARTN 103  
20 690 10.1186/s12909-018-1200-8  
21 691 113. Alkhaneen H, Alhusain F, Alshahri K, et al. Factors influencing medical students' choice of  
22 692 emergency medicine as a career specialty-a descriptive study of Saudi medical students.  
23 693 *International journal of emergency medicine* 2018;11(1):14. doi: 10.1186/s12245-018-0174-y  
24 694 [published Online First: 2018/03/09]  
25 695

1  
2  
3 696 **Legends**

4  
5 697 **Table 1. Selected Characteristics of the 75 Studies Included in this Systematic**  
6  
7 698 **Review and Meta-analysis**

8  
9 699 **Table 2. Meta-analyses of the Factors Influencing Medical Students' Choice of**  
10  
11 700 **Subspecialty**

12  
13 701 **Table 3. Meta-regression of the EOI Value Stratified by Study-level**  
14  
15 702 **Characteristics**

16  
17 703 **Figure 1. Bar Graph of the Meta-analyses of the Factors Influencing Medical**  
18  
19 704 **Students' Choice of Subspecialty Stratified by Region.**

20  
21 705 **Figure 2. Bar Graph of the Meta-analyses of the Factors Influencing Medical**  
22  
23 706 **Students' Choice of Subspecialty Stratified by Survey Year.**

24  
25  
26 707 **Supplements**

27  
28 708 **Methods S1. Search strategy used in the current systematic review and**  
29  
30 709 **meta-analysis.**

31  
32 710 **Table S1. Quality Assessment of the Included Studies.**

33  
34 711 **Table S2. Meta-analyses of the Factors Influencing Medical Students' Choice of**  
35  
36 712 **Subspecialty Stratified by Region and Survey Year.**

37  
38 713 **Figure S1. Flow Diagram of the Study Inclusion Process.**

39  
40 714 **Figure S2. Forest Plot of "Academic Interest".**

41  
42 715 **Figure S3. Forest Plot of "Competencies".**

43  
44 716 **Figure S4. Forest Plot of "Controllable Lifestyle or Flexible Work Schedule".**

45  
46 717 **Figure S5. Forest Plot of "Patient Service Orientation".**

47  
48 718 **Figure S6. Forest Plot of "Medical Teachers or Mentors".**

49  
50 719 **Figure S7. Forest Plot of "Career Opportunities".**

51  
52 720 **Figure S8. Forest Plot of "Workload or Working Hours".**

1  
2  
3 721 **Figure S9. Forest Plot of “Income”.**

4  
5 722 **Figure S10. Forest Plot of “Length of Training”.**

6  
7 723 **Figure S11. Forest Plot of “Prestige”.**

8  
9 724 **Figure S12. Forest Plot of “Advice from Others”.**

10  
11 725 **Figure S13. Forest Plot of “Student Debt”.**

12  
13 726 **Figure S14. Funnel Plots of the Publication Bias Tests of the 12 Factors.**

14  
15  
16 727

17  
18  
19  
20  
21  
22  
23  
24  
25  
26  
27  
28  
29  
30  
31  
32  
33  
34  
35  
36  
37  
38  
39  
40  
41  
42  
43  
44  
45  
46  
47  
48  
49  
50  
51  
52  
53  
54  
55  
56  
57  
58  
59  
60

For peer review only



**Table 1. Selected Characteristics of the 75 Studies Included in this Systematic Review and Meta-analysis**

| First Author, Year                          | Country     | Survey years | Sample size | Average age | Men, No. (%)  | Scores |
|---------------------------------------------|-------------|--------------|-------------|-------------|---------------|--------|
| Smith et al, <sup>41</sup> 2015             | UK          | 2012         | 2,978       | NR          | NR            | 6      |
| Cochran et al, <sup>42</sup> 2005           | USA         | 2002         | 408         | 27.2        | 214 (52.45)   | 5      |
| Hauer et al, <sup>43</sup> 2008             | USA         | 2007         | 1,177       | NR          | NR            | 6      |
| Johnson et al, <sup>44</sup> 2012           | USA         | 2012         | 622         | NR          | NR            | 6      |
| Kiolbassa et al, <sup>45</sup> 2011         | Germany     | 2010         | 1,114       | 24.1        | 408 (36.62)   | 5      |
| Klingensmith et al, <sup>46</sup> 2015      | USA         | 2013         | 792         | NR          | 539 (68.06)   | 6      |
| Lee et al, <sup>47</sup> 2012               | USA         | 2012         | 100         | NR          | 58 (58)       | 7      |
| Macdonald et al, <sup>48</sup> 2012         | New Zealand | 2011         | 134         | NR          | 79 (58.96)    | 7      |
| Parsa et al, <sup>37</sup> 2010             | Iran        | 2006-2007    | 137         | 27.34       | 49 (35.77)    | 7      |
| Paiva et al, <sup>49</sup> 1982             | USA         | 1982         | 144         | NR          | NR            | 6      |
| Ni Chroinin et al, <sup>50</sup> 2013       | UK          | 2009-2011    | 274         | NR          | 112 (40.89)   | 7      |
| Newton et al, <sup>32</sup> 2005            | USA         | 1998-2004    | 1,258       | NR          | 642 (51.03)   | 8      |
| Rogers et al, <sup>51</sup> 1990            | USA         | 1989         | 266         | NR          | 205 (77.07)   | 6      |
| Abendroth J et al, <sup>52</sup> 2014       | Germany     | 2007-2012    | 45          | NR          | 14 (31)       | 7      |
| Alawad et al, <sup>53</sup> 2015            | USA         | 2010-2011    | 45          | NR          | 36 (80)       | 8      |
| Azizzadeh et al, <sup>54</sup> 2003         | USA         | 2002         | 130         | NR          | NR            | 6      |
| Celenza et al, <sup>55</sup> 2012           | Australia   | 2009         | 216         | NR          | 121 (56.02)   | 8      |
| Dolan-Evans et al, <sup>56</sup> 2014       | Australia   | 2013         | 419         | NR          | 215 (51.31)   | 8      |
| Boyd et al, <sup>57</sup> 2009              | USA         | 2005-2006    | 5,848       | NR          | 2,982 (50.99) | 8      |
| Egerton et al, <sup>58</sup> 1985           | Ireland     | 1977-1981    | 134         | 30          | 82 (61.19)    | 6      |
| Diderichsen et al, <sup>59</sup> 2013       | Sweden      | 2006-2009    | 372         | 27          | 157 (42.20)   | 6      |
| Ferrari et al, <sup>60</sup> 2013           | Italy, UK   | 2009-2011    | 45          | 25          | NR            | 9      |
| Freire et al, <sup>61</sup> 2011            | Brazil      | 2006-2008    | 290         | 23          | 102 (35.17)   | 7      |
| Buddeberg-Fischer et al, <sup>62</sup> 2006 | Switzerland | 2001-2003    | 522         | 31.1        | 241 (46.17)   | 9      |
| Dorsey et al, <sup>63</sup> 2005            | USA         | 2003         | 11,029      | NR          | 4,964 (45.01) | 6      |
| Ekenze et al, <sup>64</sup> 2013            | Nigeria     | 2009-2010    | 96          | 25.9        | NR            | 7      |
| Barikani et al, <sup>65</sup> 2012          | Australia   | 2008-2009    | 49          | 21.7        | NR            | 6      |
| Bittaye et al, <sup>66</sup> 2012           | Gambia      | 2011         | 106         | 24.1        | 48 (45.28)    | 6      |
| Bonura et al, <sup>67</sup> 2016            | USA         | 2015         | 590         | NR          | 321 (54.40)   | 9      |
| Al-Fouzan et al, <sup>68</sup> 2012         | Kuwait      | 2011-2012    | 144         | NR          | NR            | 7      |
| AlKot et al, <sup>69</sup> 2015             | Egypt       | 2013         | 451         | 21.8        | NR            | 7      |
| Borges et al, <sup>70</sup> 2009            | USA         | 2001-2005    | 341         | NR          | NR            | 5      |
| Budd et al, <sup>71</sup> 2011              | UK          | 2011         | 870         | 22          | NR            | 7      |
| Corrigan et al, <sup>72</sup> 2007          | Ireland     | 2007         | 222         | NR          | 142 (63.96)   | 7      |
| Davis et al, <sup>73</sup> 2016             | UK          | 2016         | 173         | NR          | 76 (43.93)    | 7      |
| Deutsch et al, <sup>74</sup> 2015           | Germany     | 2011         | 659         | 27.9        | NR            | 8      |
| Gardner et al, <sup>75</sup> 2014           | Australia   | 1993-2005    | 631         | NR          | NR            | 7      |
| Dias et al, <sup>76</sup> 2013              | UK          | 2013         | 495         | NR          | 438 (88.48)   | 5      |
| Goltz et al, <sup>77</sup> 2013             | USA         | 2012         | 102         | 24.5        | 34 (33.33)    | 6      |
| Gupta et al, <sup>78</sup> 2013             | India       | 2013         | 243         | NR          | 179 (73.36)   | 6      |

|    |  |                                       |              |           |        |       |                |   |
|----|--|---------------------------------------|--------------|-----------|--------|-------|----------------|---|
| 1  |  |                                       |              |           |        |       |                |   |
| 2  |  |                                       |              |           |        |       |                |   |
| 3  |  | Hanzlick et al, <sup>79</sup> 2008    | USA          | 2006      | 161    | NR    | NR             | 6 |
| 4  |  | Harris et al, <sup>80</sup> 2005      | USA          | 1991-2002 | 104    | NR    | 53 (50.96)     | 6 |
| 5  |  | Hauer et al, <sup>81</sup> 2008       | USA          | 2008      | 80     | NR    | NR             | 6 |
| 6  |  | Labiris et al, <sup>82</sup> 2014     | Greece       | 2014      | 111    | 23.6  | 55 (49.54)     | 6 |
| 7  |  | Lambert et al, <sup>83</sup> 2008     | UK           | 2007      | 17,393 | NR    | NR             | 6 |
| 8  |  | Shah et al, <sup>84</sup> 2012        | USA          | 2011      | 892    | NR    | NR             | 6 |
| 9  |  | Lefevre et al, <sup>85</sup> 2010     | USA          | 2008      | 1,555  | NR    | 589 (37.88)    | 6 |
| 10 |  | Vicente et al, <sup>86</sup> 2013     | Chile        | 2013      | 30     | NR    | NR             | 6 |
| 11 |  | Wiesenfeld et al, <sup>87</sup> 2014  | Canada       | 2013      | 60     | NR    | NR             | 7 |
| 12 |  | Lam et al, <sup>88</sup> 2016         | Hong Kong    | 2015      | 228    | 23    | NR             | 9 |
| 13 |  | Hartung et al, <sup>89</sup> 2005     | USA          | 2004      | 192    | 20.59 | 74 (38.54)     | 4 |
| 14 |  | Girasek et al, <sup>90</sup> 2011     | Hungary      | 2011      | 536    | NR    | NR             | 5 |
| 15 |  | Zuccato et al, <sup>91</sup> 2015     | Canada       | 2012      | 37     | NR    | 24 (65)        | 6 |
| 16 |  | Wilbanks et al, <sup>92</sup> 2015    | USA          | 2011-2013 | 29,227 | NR    | 15,164 (51.99) | 9 |
| 17 |  | West et al, <sup>93</sup> 2009        | USA          | 2005-2007 | 14,890 | NR    | 8,700 (58.43)  | 6 |
| 18 |  | Watmough et al, <sup>94</sup> 2007    | UK           | 2005      | 116    | NR    | 66 (56.90)     | 4 |
| 19 |  | Thakur et al, <sup>95</sup> 2001      | USA          | 2001      | 56     | NR    | 53 (95)        | 8 |
| 20 |  | Scott et al, <sup>96</sup> 2011       | Canada       | 2002-2004 | 1,542  | NR    | NR             | 6 |
| 21 |  | Schnuth et al, <sup>97</sup> 2003     | USA          | 2002      | 203    | NR    | 72 (53.47)     | 6 |
| 22 |  | Richards et al, <sup>98</sup> 2009    | UK           | 2009      | 150    | NR    | 108 (72.00)    | 5 |
| 23 |  | Reed et al, <sup>99</sup> 2009        | USA          | 2008      | 2,022  | NR    | 1,354 (66.96)  | 9 |
| 24 |  | de Souza et al, <sup>100</sup> 2015   | Portugal     | 2012      | 1,303  | NR    | NR             | 7 |
| 25 |  | Pikoulis et al, <sup>101</sup> 2010   | Greece       | 2006-2007 | 87     | NR    | NR             | 6 |
| 26 |  | Ozer et al, <sup>102</sup> 2015       | Turkey       | 2013      | 98     | 27.7  | 26 (26.53)     | 6 |
| 27 |  | Noble et al, <sup>103</sup> 2004      | Canada       | 2004      | 21,296 | NR    | NR             | 8 |
| 28 |  | Noble et al, <sup>104</sup> 2010      | Canada       | 2007      | 120    | NR    | NR             | 5 |
| 29 |  | Newton et al, <sup>105</sup> 2005     | USA          | 2004      | 1,286  | NR    | NR             | 6 |
| 30 |  | Moore et al, <sup>106</sup> 2012      | USA          | 2011      | 337    | 26    | 179 (53.12)    | 6 |
| 31 |  | Momen et al, <sup>107</sup> 2015      | Iran         | 2014-2015 | 38     | 35.6  | 11 (29)        | 6 |
| 32 |  | Mehmood et al, <sup>108</sup> 2012    | Saudi Arabia | 2012      | 550    | NR    | 348 (63.27)    | 6 |
| 33 |  | Loriot et al, <sup>109</sup> 2010     | France       | 2007      | 44     | NR    | 17 (39)        | 7 |
| 34 |  | Lefevre et al, <sup>110</sup> 2010    | France       | 2008      | 522    | 23.8  | 198 (37.93)    | 7 |
| 35 |  | Vo et al, <sup>111</sup> 2017         | Canada       | 2017      | 90     | 22.5  | 52 (57.78)     | 5 |
| 36 |  | Grasreiner et al, <sup>112</sup> 2018 | Germany      | 2014-2016 | 181    | 24    | 33 (18.10)     | 6 |
| 37 |  | Alkhaman et al, <sup>113</sup> 2018   | Saudi Arabia | 2017      | 436    | NA    | 250 (57.00)    | 5 |

728 Footnotes: scores: quality score of the AHRQ scale.

729

**Table 2. Meta-analyses of the Factors Influencing Medical Students' Choice of Subspecialty**

| Factor                                           | No. of studies | Total no. of participants | EOI value (%) | 95% CI of EOI |       | <i>I-square</i> (%) | <i>Tau-square</i> | <i>P-Value</i> |
|--------------------------------------------------|----------------|---------------------------|---------------|---------------|-------|---------------------|-------------------|----------------|
|                                                  |                |                           |               | value         |       |                     |                   |                |
|                                                  |                |                           |               | Lower         | Upper |                     |                   |                |
| Academic interests                               | 38             | 82,366                    | 75.29         | 66.93         | 82.11 | 99.70               | 1.60              | <0.0001        |
| Competencies                                     | 17             | 76,515                    | 55.15         | 33.63         | 74.90 | 99.90               | 3.44              | <0.0001        |
| Controllable lifestyle or flexible work schedule | 44             | 101,001                   | 53.00         | 47.90         | 58.03 | 99.50               | 0.45              | <0.0001        |
| Patient service orientation                      | 37             | 46,572                    | 50.04         | 44.65         | 55.43 | 98.70               | 0.41              | <0.0001        |
| Medical teachers or                              | 32             | 85,071                    | 46.93         | 37.77         | 56.30 | 99.80               | 1.14              | <0.0001        |
| Career opportunities                             | 38             | 81,923                    | 44.00         | 32.26         | 48.78 | 99.70               | 1.15              | <0.0001        |
| Workload or working hours                        | 20             | 22,051                    | 37.99         | 29.59         | 47.19 | 98.30               | 0.69              | <0.0001        |
| Income                                           | 50             | 109,791                   | 34.70         | 28.36         | 41.62 | 99.70               | 1.09              | <0.0001        |
| Length of training                               | 18             | 42,046                    | 32.30         | 27.61         | 37.37 | 98.10               | 0.20              | <0.0001        |
| Prestige                                         | 26             | 30,629                    | 31.17         | 26.32         | 37.69 | 98.30               | 0.52              | <0.0001        |
| Advice from others                               | 18             | 82,692                    | 28.24         | 22.26         | 34.23 | 99.80               | 0.02              | <0.0001        |
| Student debt                                     | 8              | 38,917                    | 15.33         | 10.96         | 21.03 | 98.80               | 0.27              | <0.0001        |

730

**Table 3. Meta-regression of the EOI Value Stratified by Study-level Characteristics**

| Factor                                           | estimate     | 95 CI% of estimate |         | P-Value |        |
|--------------------------------------------------|--------------|--------------------|---------|---------|--------|
|                                                  |              | Lower              | Upper   |         |        |
| Academic interests                               | Country      | -0.2314            | -1.1575 | 0.6946  | 0.6302 |
|                                                  | Survey years | 0.3811             | -0.3580 | 1.1202  | 0.2711 |
|                                                  | Specialty    | -0.4892            | -1.5345 | 0.5562  | 0.4008 |
| Competencies                                     | Sample size  | 0.2362             | -0.5488 | 1.0212  | 0.6537 |
|                                                  | Country      | 0.6946             | -1.1461 | 0.8938  | 0.8376 |
|                                                  | Survey years | -1.0418            | -2.0950 | 0.0114  | 0.0151 |
| Controllable lifestyle or flexible work schedule | Specialty    | 0.0904             | -1.5786 | 1.7594  | 0.9398 |
|                                                  | Sample size  | -0.5720            | -1.8606 | 0.7166  | 0.5823 |
|                                                  | Country      | -0.1261            | -1.1461 | 0.8938  | 0.9614 |
| Patient service orientation                      | Survey years | -0.0001            | -0.4052 | 0.4051  | 0.9822 |
|                                                  | Specialty    | -0.8989            | -1.4979 | -0.3000 | 0.0035 |
|                                                  | Sample size  | -0.0518            | -0.4396 | 0.3361  | 0.7203 |
| Medical teachers or mentors                      | Country      | -0.6238            | -1.3118 | 0.0642  | 0.0833 |
|                                                  | Survey years | -0.0414            | -0.6912 | 0.6083  | 0.8524 |
|                                                  | Specialty    | -1.5982            | -2.5227 | -0.6737 | 0.0010 |
| Career opportunities                             | Sample size  | -0.1157            | -0.7473 | 0.5159  | 0.6358 |
|                                                  | Country      | 0.7395             | 0.3117  | 1.1674  | 0.0007 |
|                                                  | Survey years | 0.1133             | -0.3580 | 0.5845  | 0.6376 |
| Workload or working hours                        | Specialty    | 0.0605             | -0.4441 | 0.5652  | 0.8141 |
|                                                  | Sample size  | -0.1202            | -0.5567 | 0.3163  | 0.5894 |
|                                                  | Country      | 0.1075             | -0.7030 | 0.9179  | 0.5828 |
| Income                                           | Survey years | 0.3284             | -0.3913 | 1.0480  | 0.7546 |
|                                                  | Specialty    | -0.9292            | -1.8015 | -0.0570 | 0.0077 |
|                                                  | Sample size  | 0.3654             | 0.1156  | 1.5478  | 0.0081 |
| Length of training                               | Country      | -0.4535            | -1.5086 | 0.6016  | 0.3981 |
|                                                  | Survey years | 0.4624             | -0.5417 | 1.4665  | 0.3922 |
|                                                  | Specialty    | -0.9878            | -2.1727 | 0.1972  | 0.1070 |
| Prestige                                         | Sample size  | 0.0982             | -0.8589 | 1.0553  | 0.8205 |
|                                                  | Country      | 0.1058             | -0.4665 | 0.6781  | 0.7390 |
|                                                  | Survey years | 0.0999             | -0.4379 | 0.6377  | 0.8774 |
| Advice from others                               | Specialty    | -0.6457            | -1.3267 | 0.0352  | 0.0480 |
|                                                  | Sample size  | 0.0523             | -0.4826 | 0.5872  | 0.6786 |
|                                                  | Country      | -0.1559            | -1.2782 | 0.9664  | 0.7854 |
| Advice from others                               | Survey years | -0.2158            | -1.4089 | 0.9772  | 0.7229 |
|                                                  | Specialty    | 0.3959             | -0.9585 | 1.7502  | 0.5667 |
|                                                  | Sample size  | 0.1565             | -0.6631 | 0.9761  | 0.7082 |
| Advice from others                               | Country      | -0.3346            | -1.0799 | 0.4106  | 0.3485 |
|                                                  | Survey years | -0.4513            | -1.1378 | 0.2352  | 0.0950 |
|                                                  | Specialty    | -1.0112            | -1.8980 | -0.1244 | 0.0172 |
| Advice from others                               | Sample size  | 0.0355             | -0.6013 | 0.6723  | 0.5214 |
|                                                  | Country      | -0.0097            | -0.0722 | 0.0529  | 0.9328 |
| Advice from others                               | Survey years | -0.0861            | -0.1471 | -0.0251 | 0.0057 |

1  
2  
3  
4  
5  
6  
7  
8  
9  
10  
11  
12  
13  
14  
15  
16  
17  
18  
19  
20  
21  
22  
23  
24  
25  
26  
27  
28  
29  
30  
31  
32  
33  
34  
35  
36  
37  
38  
39  
40  
41  
42  
43  
44  
45  
46  
47  
48  
49  
50  
51  
52  
53  
54  
55  
56  
57  
58  
59  
60

731

|              |              |         |         |         |         |
|--------------|--------------|---------|---------|---------|---------|
|              | Specialty    | -0.2017 | -0.2790 | -0.1244 | <0.0001 |
|              | Sample size  | 0.2125  | 0.1309  | 0.2941  | <0.0001 |
|              | Country      | 2.7853  | 2.0544  | 3.5162  | 0.0001  |
| Student debt | Survey years | -0.1567 | -0.6707 | 0.3573  | 0.5502  |
|              | Sample size  | -0.5248 | -1.0108 | -0.0388 | 0.0343  |

For peer review only

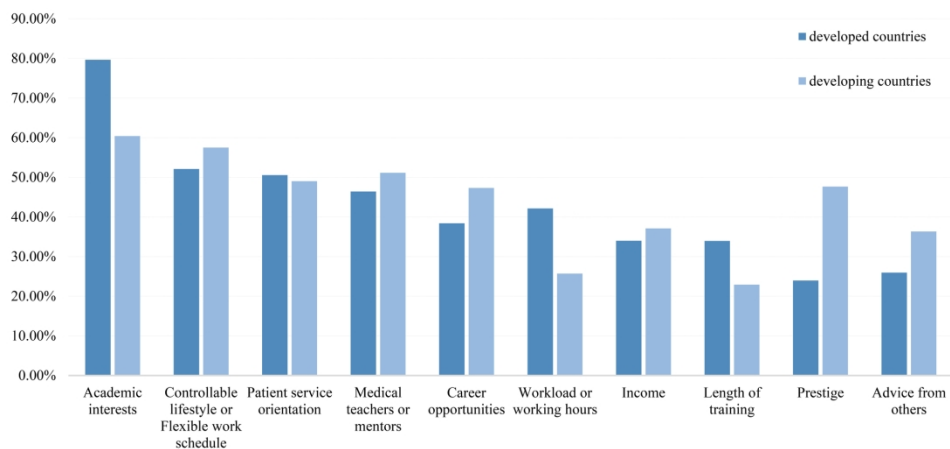

Figure 1. Bar Graph of the Meta-analyses of the Factors Influencing Medical Students' Choice of Subspecialty Stratified by Region.

190x107mm (300 x 300 DPI)

1  
2  
3  
4  
5  
6  
7  
8  
9  
10  
11  
12  
13  
14  
15  
16  
17  
18  
19  
20  
21  
22  
23  
24  
25  
26  
27  
28  
29  
30  
31  
32  
33  
34  
35  
36  
37  
38  
39  
40  
41  
42  
43  
44  
45  
46  
47  
48  
49  
50  
51  
52  
53  
54  
55  
56  
57  
58  
59  
60

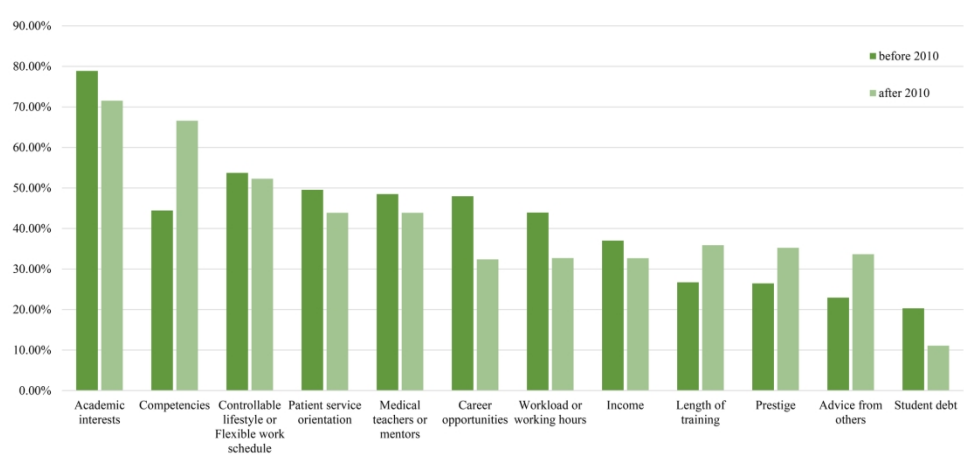

Figure 2. Bar Graph of the Meta-analyses of the Factors Influencing Medical Students' Choice of Subspecialty Stratified by Survey Year.

190x107mm (300 x 300 DPI)

1  
2  
3  
4 **SI Methods. Search strategy used in the current systematic review and meta-**  
5  
6 **analysis.**  
7  
8  
9

10  
11 ***Medical Students***

- 12  
13  
14 1. Students, Medical [Mesh]  
15  
16 2. Medical students  
17  
18 3. Medical student  
19  
20 4. Student, Medical  
21  
22 5. OR / 1 – 4  
23  
24  
25  
26

13. Cross sectional study  
14. Cross sectional study [Publication  
Type]  
15. Cross sectional study [Mesh Terms]  
16. Systematic review  
17. Systematic review [Publication Type]  
18. Systematic review [Mesh Terms]

27  
28  
29  
30 ***Subspecialty Choice***

- 31  
32 6. Career choices  
33  
34 7. Choice, Career  
35  
36 8. Choices career  
37  
38 9. Specialties  
39  
40  
41  
42 10. Sub-specialties  
43  
44  
45 11. Sub-discipline  
46  
47  
48 12. OR / 6 – 11  
49  
50

19. Meta-analysis [Title/Abstract]  
20. Meta-analysis [Mesh Terms]  
21. Meta-analysis [Publication Type]  
22. OR / 12 – 21

51  
52 ***Factors***

23. Factors

53 ***Combined search***

23. #5 AND #12AND #22 AND #2

54 ***Study design***

55  
56  
57  
58 **Abbreviations:** MeSH, Medical Subject Heading in PubMed  
59  
60



**Table S1. Quality assessment of the included studies**

| Quality assessment criteria                    | 1 | 2 | 3 | 4 | 5 | 6 | 7 | 8 | 9 | 10 | 11 | Scores |
|------------------------------------------------|---|---|---|---|---|---|---|---|---|----|----|--------|
| 1 Smith et al, <sup>41</sup> 2015              | Y | U | Y | Y | N | Y | N | Y | N | Y  | N  | 6      |
| 2 Cochran et al, <sup>42</sup> 2005            | Y | U | Y | Y | N | Y | N | Y | N | N  | N  | 5      |
| 3 Hauer et al, <sup>43</sup> 2008              | Y | U | Y | Y | N | Y | N | Y | N | Y  | N  | 6      |
| 4 Johnson et al, <sup>44</sup> 2012            | Y | U | Y | Y | N | Y | N | Y | N | Y  | N  | 6      |
| 5 Kiolbassa et al, <sup>45</sup> 2011          | Y | U | Y | Y | N | Y | N | Y | N | N  | N  | 5      |
| 6 Klingensmith et al, <sup>46</sup> 2015       | Y | U | Y | Y | N | Y | N | Y | N | Y  | N  | 6      |
| 7 Lee et al, <sup>47</sup> 2012                | Y | U | Y | Y | Y | Y | N | Y | N | Y  | N  | 7      |
| 8 Macdonald et al, <sup>48</sup> 2012          | Y | U | Y | Y | Y | Y | N | Y | N | Y  | N  | 7      |
| 9 Parsa et al, <sup>37</sup> 2010              | Y | U | Y | Y | Y | Y | N | Y | N | Y  | N  | 7      |
| 10 Paiva et al, <sup>49</sup> 1982             | Y | U | Y | Y | N | Y | N | Y | N | Y  | N  | 6      |
| 11 Ni Chroinin et al, <sup>50</sup> 2013       | Y | U | Y | Y | Y | Y | N | Y | N | Y  | N  | 7      |
| 12 Newton et al, <sup>32</sup> 2005            | Y | U | Y | Y | Y | Y | Y | Y | N | Y  | N  | 8      |
| 13 Rogers et al, <sup>51</sup> 1990            | Y | U | Y | Y | N | Y | N | Y | N | Y  | N  | 6      |
| 14 Abendroth J et al, <sup>52</sup> 2014       | Y | U | Y | Y | N | Y | N | Y | N | Y  | Y  | 7      |
| 15 Alawad et al, <sup>53</sup> 2015            | Y | U | Y | Y | N | Y | Y | Y | Y | Y  | N  | 8      |
| 16 Azizzadeh et al, <sup>54</sup> 2003         | Y | U | Y | Y | Y | Y | N | N | N | Y  | N  | 6      |
| 17 Celenza et al, <sup>55</sup> 2012           | Y | U | Y | Y | Y | Y | Y | N | Y | Y  | N  | 8      |
| 18 Dolan-Evans et al, <sup>56</sup> 2014       | Y | U | Y | Y | Y | Y | N | Y | N | Y  | Y  | 8      |
| 19 Boyd et al, <sup>57</sup> 2009              | Y | U | Y | Y | Y | Y | Y | Y | N | Y  | N  | 8      |
| 20 Egerton et al, <sup>58</sup> 1985           | Y | U | Y | Y | N | Y | N | Y | N | Y  | N  | 6      |
| 21 Diderichsen et al, <sup>59</sup> 2013       | Y | U | Y | Y | N | Y | N | Y | N | Y  | N  | 6      |
| 22 Ferrari et al, <sup>60</sup> 2013           | Y | U | Y | Y | Y | Y | Y | Y | Y | Y  | N  | 9      |
| 23 Freire et al, <sup>61</sup> 2011            | Y | U | Y | Y | Y | Y | N | Y | N | Y  | N  | 7      |
| 24 Buddeberg-Fischer et al, <sup>62</sup> 2006 | Y | U | Y | Y | N | Y | Y | Y | Y | Y  | Y  | 9      |
| 25 Dorsey et al, <sup>63</sup> 2005            | Y | U | Y | Y | N | Y | N | Y | N | Y  | N  | 6      |
| 26 Ekenze et al, <sup>64</sup> 2013            | Y | U | Y | Y | Y | Y | Y | N | N | Y  | N  | 7      |
| 27 Barikani et al, <sup>65</sup> 2012          | Y | U | Y | Y | N | Y | N | Y | N | Y  | N  | 6      |
| 28 Bittaye et al, <sup>66</sup> 2012           | Y | U | Y | Y | N | Y | N | Y | N | Y  | N  | 6      |
| 39 Bonura et al, <sup>67</sup> 2016            | Y | U | Y | Y | Y | Y | Y | Y | Y | Y  | N  | 9      |
| 30 Al-Fouzan et al, <sup>68</sup> 2012         | Y | U | Y | Y | Y | Y | N | Y | N | Y  | N  | 7      |
| 31 AlKot et al, <sup>69</sup> 2015             | Y | U | Y | Y | Y | Y | N | Y | N | Y  | N  | 7      |
| 32 Borges et al, <sup>70</sup> 2009            | Y | U | Y | Y | N | Y | N | N | N | Y  | N  | 5      |
| 33 Budd et al, <sup>71</sup> 2011              | Y | U | Y | Y | Y | Y | N | Y | N | Y  | N  | 7      |
| 34 Corrigan et al, <sup>72</sup> 2007          | Y | U | Y | Y | Y | Y | N | Y | N | Y  | N  | 7      |
| 35 Davis et al, <sup>73</sup> 2016             | Y | U | Y | Y | Y | Y | N | Y | N | Y  | N  | 7      |
| 36 Deutsch et al, <sup>74</sup> 2015           | Y | U | Y | Y | Y | Y | N | Y | Y | Y  | N  | 8      |
| 37 Gardner et al, <sup>75</sup> 2014           | Y | U | Y | Y | N | Y | N | Y | N | Y  | N  | 7      |
| 38 Dias et al, <sup>76</sup> 2013              | Y | U | Y | Y | N | Y | N | N | N | Y  | N  | 5      |
| 39 Goltz et al, <sup>77</sup> 2013             | Y | U | Y | Y | N | Y | N | Y | N | Y  | N  | 6      |
| 40 Gupta et al, <sup>78</sup> 2013             | Y | U | Y | Y | N | Y | N | Y | N | Y  | N  | 6      |
| 41 Hanzlick et al, <sup>79</sup> 2008          | Y | U | Y | Y | N | Y | N | Y | N | Y  | N  | 6      |
| 42 Harris et al, <sup>80</sup> 2005            | Y | U | Y | Y | N | Y | N | Y | N | Y  | N  | 6      |
| 43 Hauer et al, <sup>81</sup> 2008             | Y | U | Y | Y | N | Y | N | Y | N | Y  | N  | 6      |
| 44 Labiris et al, <sup>82</sup> 2014           | Y | U | Y | Y | N | Y | N | Y | N | Y  | N  | 6      |
| 45 Lambert et al, <sup>83</sup> 2008           | Y | U | Y | Y | N | Y | N | Y | N | Y  | N  | 6      |
| 46 Shah et al, <sup>84</sup> 2012              | Y | U | Y | Y | N | Y | N | Y | N | Y  | N  | 6      |
| 47 Lefevre et al, <sup>85</sup> 2010           | Y | U | Y | Y | N | Y | N | Y | N | Y  | N  | 6      |
| 48 Vicente et al, <sup>86</sup> 2013           | Y | U | Y | Y | N | N | Y | N | Y | Y  | N  | 6      |
| 49 Wiesenfeld et al, <sup>87</sup> 2014        | Y | U | Y | Y | Y | Y | N | Y | N | Y  | N  | 7      |
| 50 Lam et al, <sup>88</sup> 2016               | Y | U | Y | Y | Y | Y | Y | Y | Y | Y  | N  | 9      |
| 51 Hartung et al, <sup>89</sup> 2005           | Y | U | Y | Y | N | Y | N | N | N | N  | N  | 4      |
| 52 Girasek et al, <sup>90</sup> 2011           | Y | U | Y | Y | N | Y | N | N | N | Y  | N  | 5      |
| 53 Zuccato et al, <sup>91</sup> 2015           | Y | U | Y | Y | N | Y | N | Y | N | Y  | N  | 6      |
| 54 Wilbanks et al, <sup>92</sup> 2015          | Y | U | Y | Y | N | Y | Y | Y | Y | Y  | Y  | 9      |
| 55 West et al, <sup>93</sup> 2009              | Y | U | Y | Y | N | Y | N | Y | N | Y  | N  | 6      |
| 56 Watmough et al, <sup>94</sup> 2007          | Y | U | Y | Y | N | N | N | N | N | Y  | N  | 4      |
| 57 Thakur et al, <sup>95</sup> 2001            | Y | U | Y | Y | Y | Y | Y | N | Y | Y  | N  | 8      |
| 58 Scott et al, <sup>96</sup> 2011             | Y | U | Y | Y | N | Y | N | Y | N | Y  | N  | 6      |
| 59 Schnuth et al, <sup>97</sup> 2003           | Y | U | Y | Y | N | Y | N | Y | N | Y  | N  | 6      |
| 60 Richards et al, <sup>98</sup> 2009          | Y | U | Y | Y | N | Y | N | N | N | Y  | N  | 5      |
| 61 Reed et al, <sup>99</sup> 2009              | Y | U | Y | Y | Y | Y | Y | Y | Y | Y  | N  | 9      |
| 62 de Souza et al, <sup>100</sup> 2015         | Y | U | Y | Y | Y | Y | N | Y | N | Y  | N  | 7      |
| 63 Pikoulis et al, <sup>101</sup> 2010         | Y | U | Y | Y | N | Y | N | Y | N | Y  | N  | 6      |
| 64 Ozer et al, <sup>102</sup> 2015             | Y | U | Y | Y | N | N | Y | N | Y | Y  | N  | 6      |
| 65 Noble et al, <sup>103</sup> 2004            | Y | U | Y | Y | Y | Y | Y | Y | N | Y  | N  | 8      |
| 66 Noble et al, <sup>104</sup> 2010            | Y | U | Y | Y | N | Y | N | N | N | Y  | N  | 5      |
| 67 Newton et al, <sup>105</sup> 2005           | Y | U | Y | Y | N | Y | Y | N | N | Y  | N  | 6      |
| 68 Moore et al, <sup>106</sup> 2012            | Y | U | Y | Y | Y | Y | N | Y | N | N  | N  | 6      |
| 69 Momen et al, <sup>107</sup> 2015            | Y | U | Y | Y | N | Y | N | Y | N | Y  | N  | 6      |
| 70 Mehmood et al, <sup>108</sup> 2012          | Y | U | Y | Y | N | Y | N | Y | N | Y  | N  | 6      |
| 71 Loriot et al, <sup>109</sup> 2010           | Y | U | Y | Y | Y | Y | N | Y | N | Y  | N  | 7      |
| 72 Lefevre et al, <sup>110</sup> 2010          | Y | U | Y | Y | Y | Y | N | Y | N | Y  | N  | 7      |
| 73 Vo et al, <sup>111</sup> 2017               | Y | U | Y | Y | Y | N | N | N | N | Y  | N  | 5      |
| 74 Grasreiner et al, <sup>112</sup> 2018       | Y | U | Y | Y | Y | Y | N | N | N | Y  | N  | 6      |
| 75 Alkhaman et al, <sup>113</sup> 2018         | Y | U | Y | Y | N | N | Y | N | N | Y  | N  | 5      |

**Quality assessment criteria in detail**

1. Define the source of information (survey, record review).
2. List the inclusion and exclusion criteria for the exposed and unexposed subjects (cases and controls) or refer to previous publications.
3. Indicate the time period used for identifying patients.
4. Indicate whether the subjects were consecutive if not population-based.
5. Indicate whether the evaluators of the subjective components of the study were masked to the other aspects of participants' status.
6. Describe any assessments undertaken for quality assurance purposes (e.g., test/retest of primary outcome measurements)
7. Explain any patient exclusion from the analyses.
8. Describe how confounding was assessed and/or controlled.
9. If applicable, explain how missing data were handled in the analysis.
10. Summarize the patient response rates and the completeness of the data collection.
11. Clarify what follow-up, if any, was expected and the percentage of patients with incomplete data or follow-up.

“Y”: Yes; “N”: No; “U”: Unclear.

**Table S2. Meta-analyses of the Factors Influencing Medical Students' Choice of Subspecialty Stratified by Region and Survey Year.**

| Factor                                           |             | No. of studies | Total no. of participants | Extent of influence (%) | 95 CI% of EOI value |       | <i>I-square</i> (%) | <i>P</i> -Value | <i>Q</i> -Value |      |      |
|--------------------------------------------------|-------------|----------------|---------------------------|-------------------------|---------------------|-------|---------------------|-----------------|-----------------|------|------|
|                                                  |             |                |                           |                         | Lower               | Upper |                     |                 |                 |      |      |
| Academic interest                                | developed   | 28             | 80,000                    | 79.66                   | 70.73               | 86.39 | 99.8                | 0.02            | 3.51            |      |      |
|                                                  | developing  | 10             | 2,366                     | 60.41                   | 43.44               | 75.19 | 98.0                |                 |                 |      |      |
|                                                  | before 2010 | 29             | 44,174                    | 78.88                   | 69.04               | 86.22 | 99.7                | 0.40            | 1.21            |      |      |
|                                                  | after 2010  | 9              | 38,192                    | 71.54                   | 57.66               | 82.27 | 99.6                |                 |                 |      |      |
| Competencies                                     | before 2010 | 9              | 43,134                    | 44.40                   | 29.11               | 60.83 | 99.8                | 0.21            | 1.86            |      |      |
|                                                  | after 2010  | 8              | 33,381                    | 66.60                   | 34.48               | 88.31 | 99.8                |                 |                 |      |      |
| Controllable lifestyle or flexible work schedule | developed   | 37             | 100,980                   | 52.11                   | 46.52               | 57.65 | 99.6                | 0.63            | 0.68            |      |      |
|                                                  | developing  | 7              | 2,017                     | 57.50                   | 45.81               | 68.41 | 95.9                |                 |                 |      |      |
|                                                  | before 2010 | 22             | 62,945                    | 53.72                   | 47.48               | 59.84 | 99.4                |                 |                 | 0.97 | 0.05 |
| after 2010                                       | 22          | 40,056         | 52.29                     | 43.51                   | 60.93               | 99.2  |                     |                 |                 |      |      |
| Patient service orientation                      | developed   | 27             | 44,235                    | 50.56                   | 44.68               | 56.42 | 98.8                | 0.74            | 0.48            |      |      |
|                                                  | developing  | 10             | 2,337                     | 49.02                   | 31.62               | 66.67 | 98.1                |                 |                 |      |      |
|                                                  | before 2010 | 18             | 40,997                    | 49.56                   | 43.29               | 55.84 | 98.8                |                 |                 | 0.70 | 0.54 |
|                                                  | after 2010  | 19             | 5,579                     | 43.87                   | 38.62               | 63.80 | 98.3                |                 |                 |      |      |
| Medical teachers or mentors                      | developed   | 28             | 84,076                    | 46.43                   | 36.63               | 56.52 | 99.8                | 0.73            | 0.48            |      |      |
|                                                  | developing  | 4              | 995                       | 51.14                   | 33.97               | 68.04 | 95.4                |                 |                 |      |      |
|                                                  | before 2010 | 21             | 49,654                    | 48.48                   | 36.93               | 60.19 | 99.8                |                 |                 | 0.70 | 0.54 |
|                                                  | after 2010  | 11             | 35,417                    | 43.87                   | 27.94               | 61.18 | 99.7                |                 |                 |      |      |
| Career opportunities                             | developed   | 31             | 79,867                    | 38.41                   | 29.61               | 48.04 | 99.8                | 0.60            | 0.74            |      |      |
|                                                  | developing  | 7              | 2,056                     | 47.32                   | 30.38               | 64.91 | 98.1                |                 |                 |      |      |
|                                                  | before 2010 | 20             | 43,417                    | 47.97                   | 33.54               | 62.74 | 99.8                |                 |                 | 0.24 | 1.68 |
|                                                  | after 2010  | 18             | 38,506                    | 32.38                   | 21.68               | 45.31 | 99.5                |                 |                 |      |      |
| Workload or working hours                        | developed   | 15             | 20,970                    | 42.14                   | 31.35               | 53.72 | 98.6                | 0.34            | 1.39            |      |      |
|                                                  | developing  | 5              | 1,081                     | 25.72                   | 13.29               | 43.88 | 95.3                |                 |                 |      |      |
|                                                  | before 2010 | 9              | 19,456                    | 43.93                   | 29.43               | 59.54 | 98.8                |                 |                 | 0.41 | 1.21 |
|                                                  | after 2010  | 11             | 2,595                     | 32.70                   | 29.43               | 59.54 | 97.4                |                 |                 |      |      |
| Income                                           | developed   | 39             | 107,091                   | 34.01                   | 26.89               | 41.93 | 99.8                | 0.84            | 0.29            |      |      |
|                                                  | developing  | 11             | 2,700                     | 37.11                   | 27.06               | 48.41 | 96.4                |                 |                 |      |      |
|                                                  | before 2010 | 25             | 68,714                    | 37.01                   | 25.95               | 49.62 | 99.8                |                 |                 | 0.41 | 1.18 |
|                                                  | after 2010  | 25             | 41,077                    | 32.67                   | 26.04               | 40.07 | 98.9                |                 |                 |      |      |
| Length of training                               | developed   | 15             | 41,246                    | 33.95                   | 28.72               | 39.60 | 98.4                | 0.31            | 1.48            |      |      |
|                                                  | developing  | 3              | 800                       | 22.92                   | 10.94               | 41.85 | 94.0                |                 |                 |      |      |
|                                                  | before 2010 | 7              | 8,811                     | 26.72                   | 15.89               | 41.29 | 98.9                |                 |                 | 0.28 | 1.59 |
|                                                  | after 2010  | 11             | 33,234                    | 35.87                   | 29.67               | 42.59 | 96.9                |                 |                 |      |      |
| Prestige                                         | developed   | 17             | 27,987                    | 23.96                   | 19.20               | 29.47 | 97.3                | 0.01            | 4.71            |      |      |
|                                                  | developing  | 9              | 2,642                     | 47.65                   | 34.41               | 61.24 | 97.6                |                 |                 |      |      |
|                                                  | before 2010 | 12             | 25,542                    | 26.46                   | 20.78               | 33.03 | 96.7                |                 |                 | 0.25 | 1.67 |
|                                                  | after 2010  | 14             | 5,087                     | 35.22                   | 24.70               | 47.40 | 98.3                |                 |                 |      |      |
| Advice from others                               | developed   | 14             | 81,205                    | 25.95                   | 19.27               | 32.64 | 99.8                | 0.36            | 1.33            |      |      |
|                                                  | developing  | 4              | 1,487                     | 36.34                   | 18.91               | 53.77 | 98.1                |                 |                 |      |      |
|                                                  | before 2010 | 10             | 48,319                    | 22.93                   | 17.85               | 28.01 | 99.5                |                 |                 | 0.31 | 1.47 |
|                                                  | after 2010  | 8              | 34,373                    | 33.65                   | 25.12               | 42.18 | 99.1                |                 |                 |      |      |
| Student debt                                     | before 2010 | 5              | 6,610                     | 20.29                   | 15.86               | 25.57 | 81.8                | 0.69            | 0.59            |      |      |
|                                                  | after 2010  | 3              | 32,307                    | 11.08                   | 1.58                | 49.08 | 99.6                |                 |                 |      |      |

**Figure S1. Flow Diagram of the Study Inclusion.**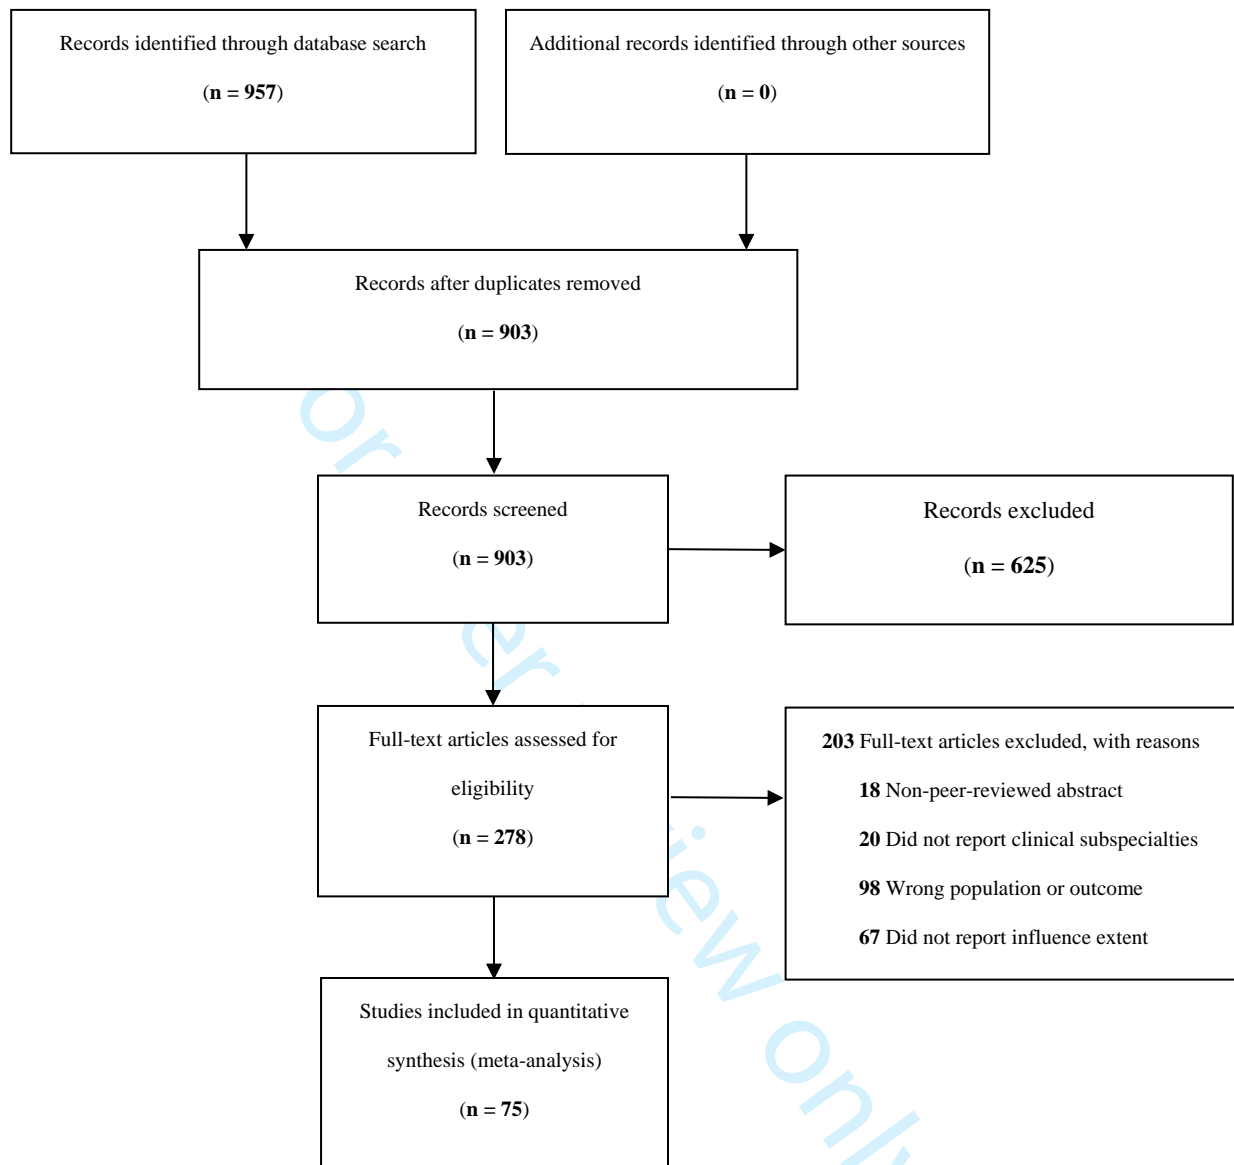

Figure S2. Forest Plot of “Academic Interest”.

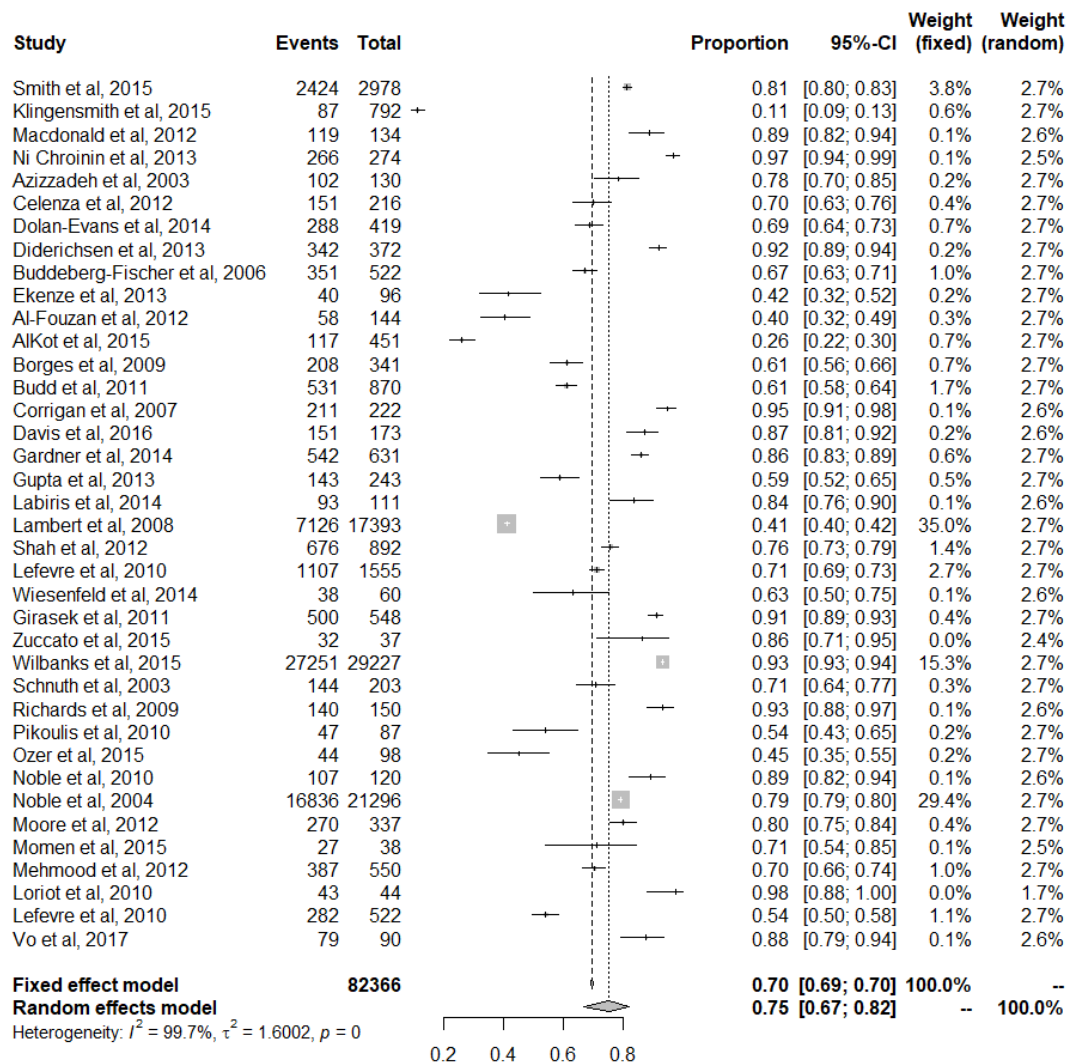

**Figure S3. Forest Plot of “Competencies”.**

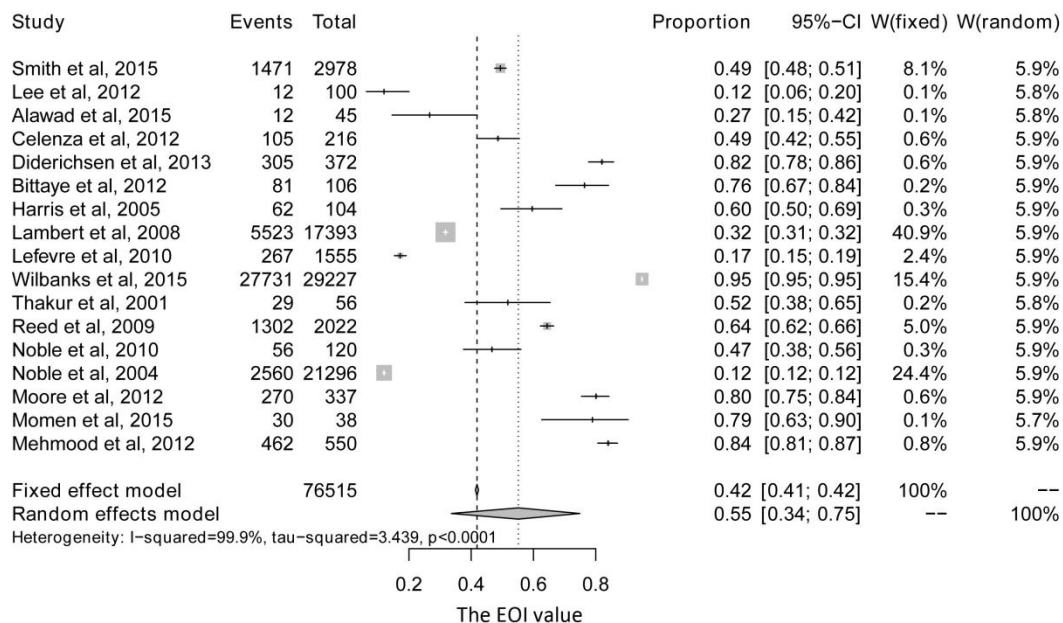

review only

Figure S4. Forest Plot of “Controllable Lifestyle or Flexible Work Schedule”.

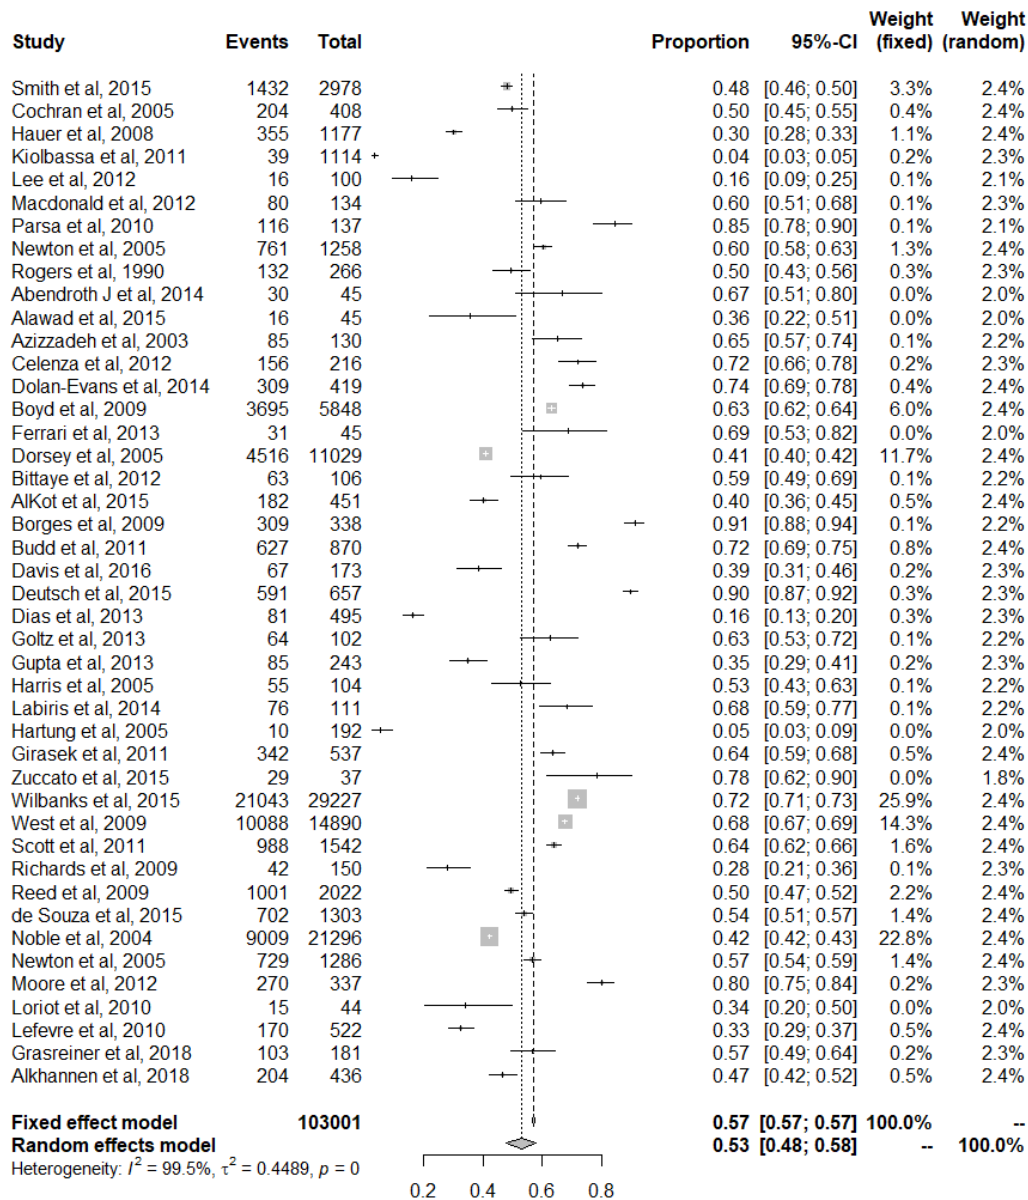

Figure S5. Forest Plot of “Patient Service Orientation”.

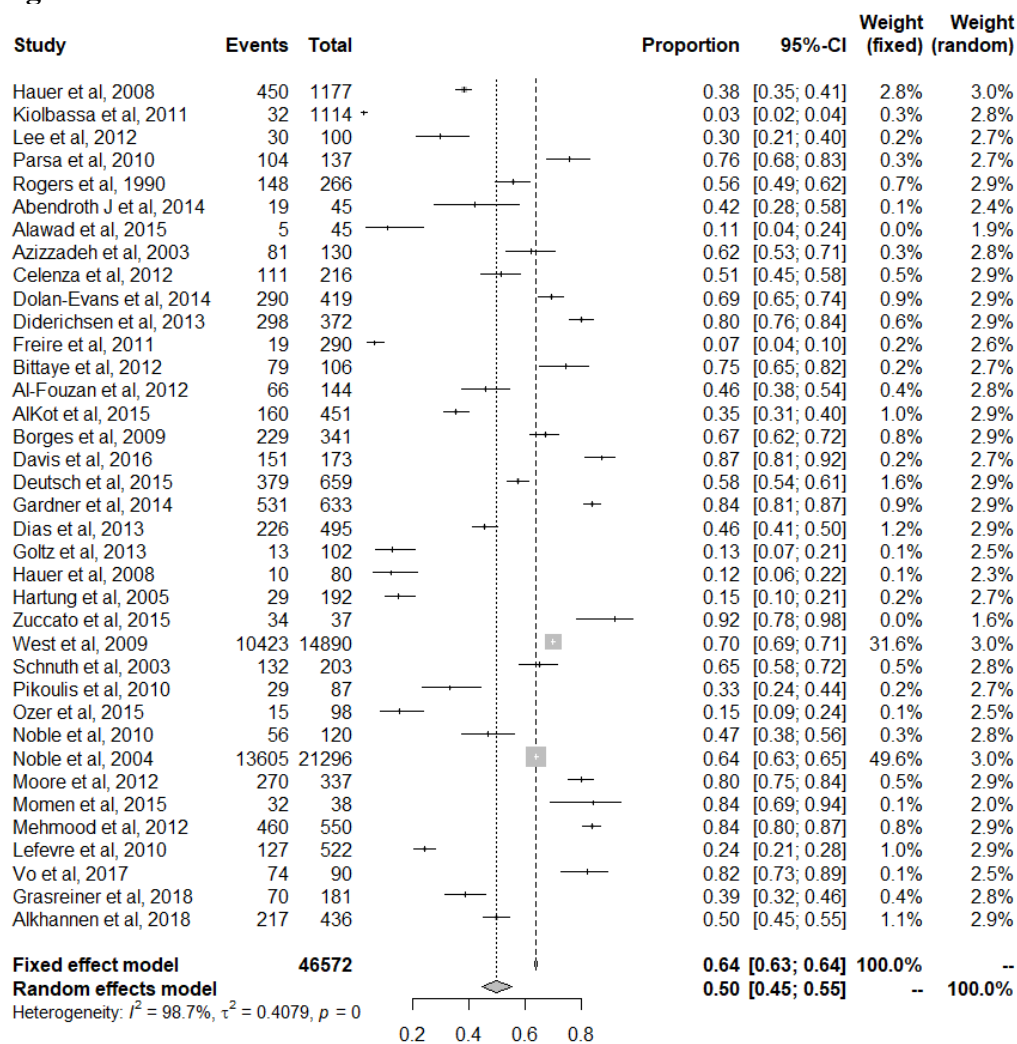

Figure S6. Forest Plot of “Medical Teachers or Mentors”.

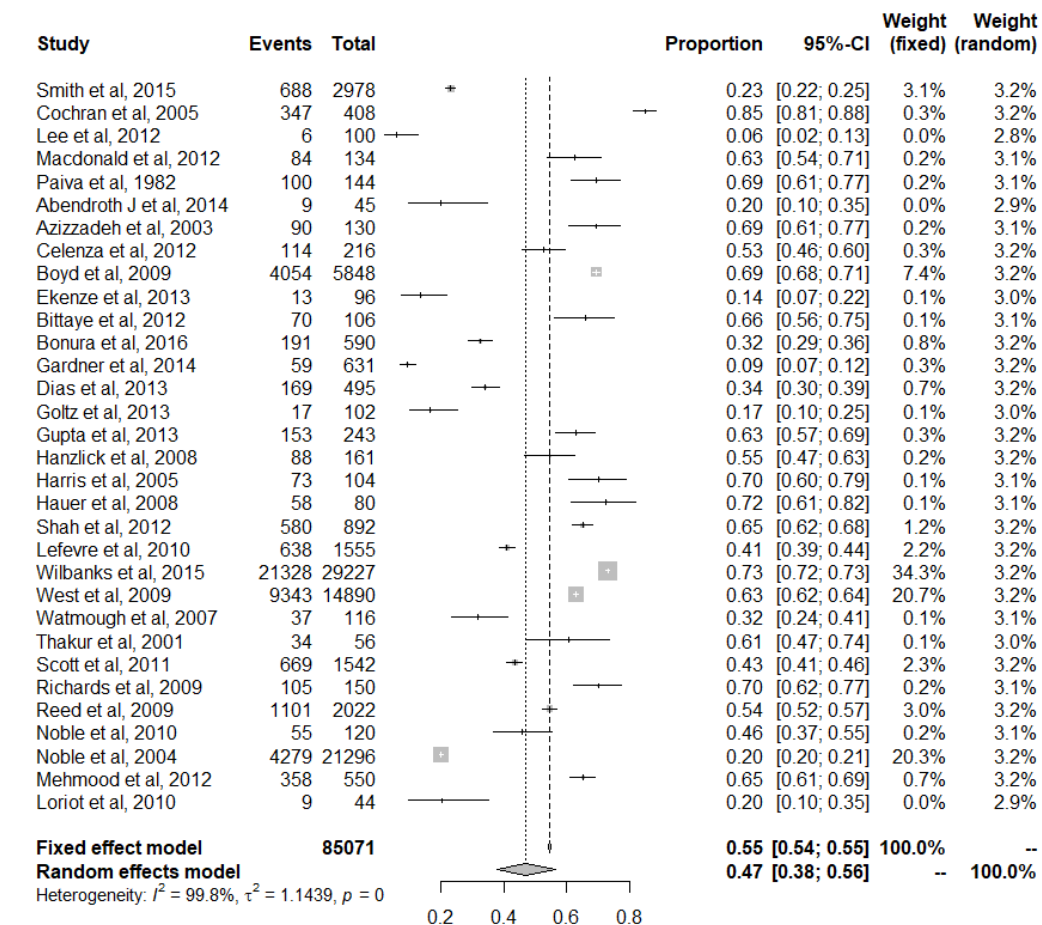



Figure S7. Forest Plot of “Career Opportunities”.

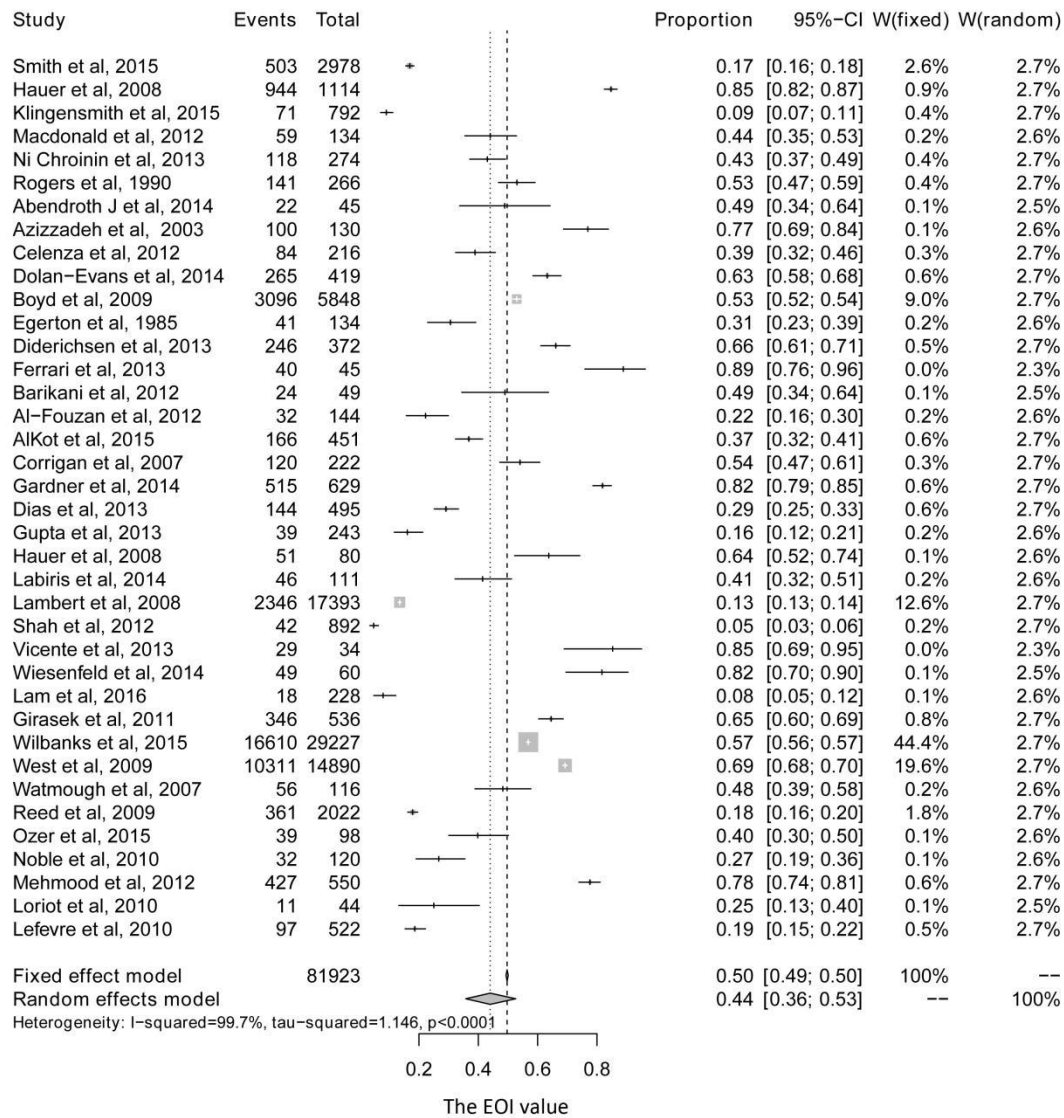

Figure S8. Forest Plot of “Workload or Working Hours”.

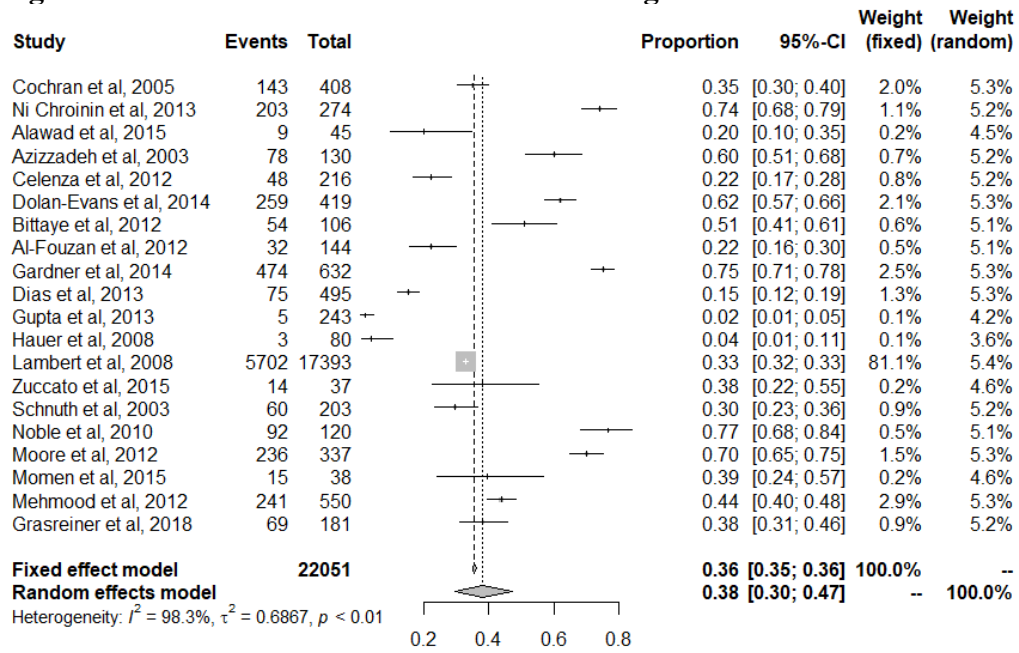

Figure S9. Forest Plot of “Income”.

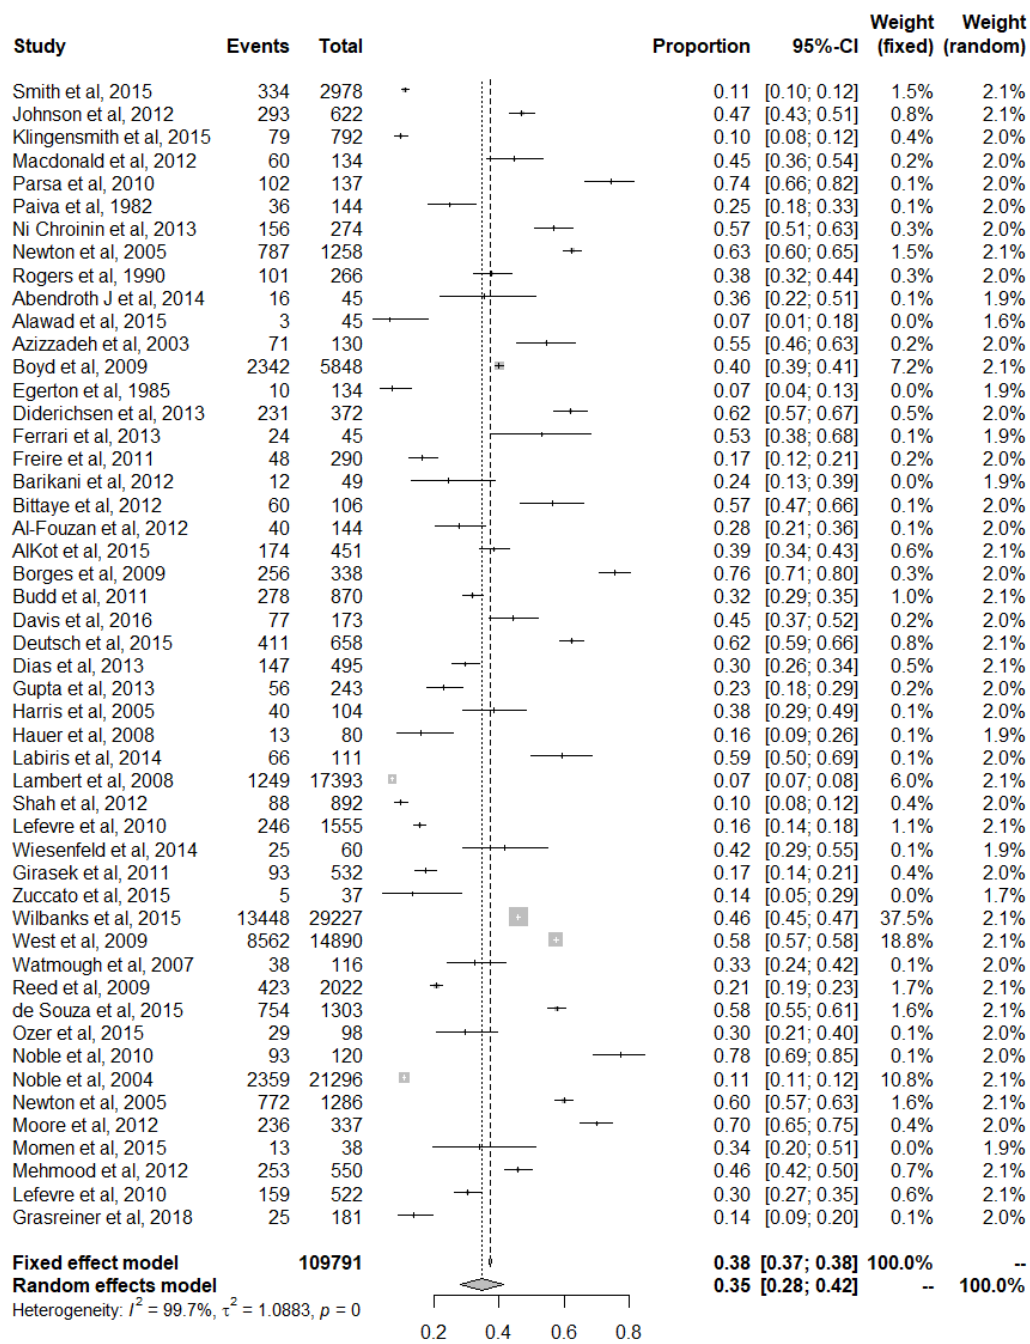

**Figure S10. Forest Plot of “Length of Training”.**

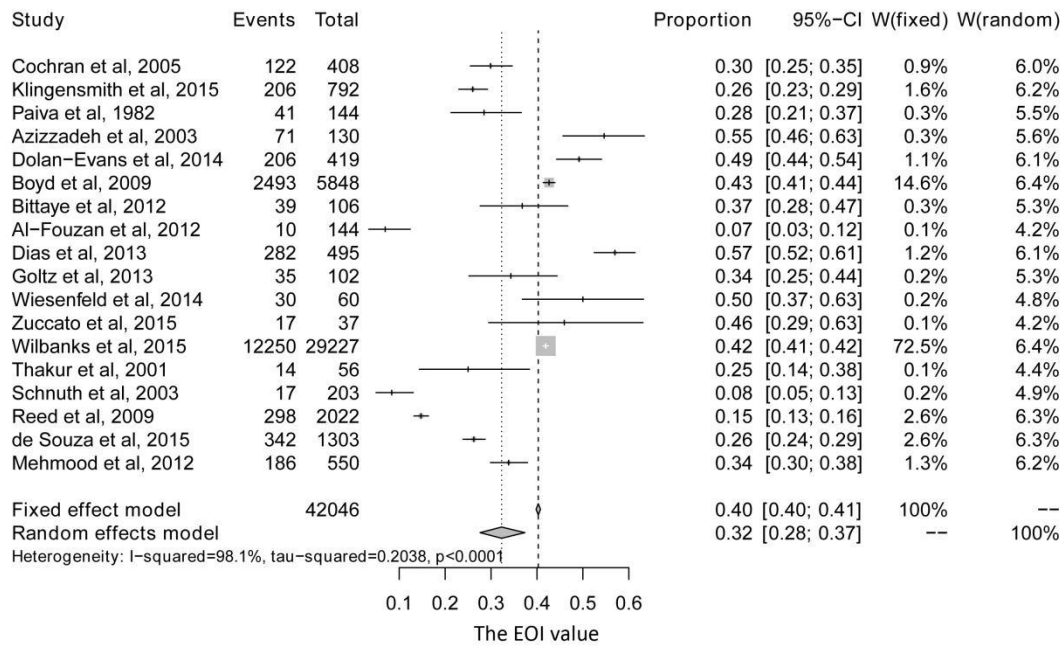

review only

Figure S11. Forest Plot of “Prestige”.

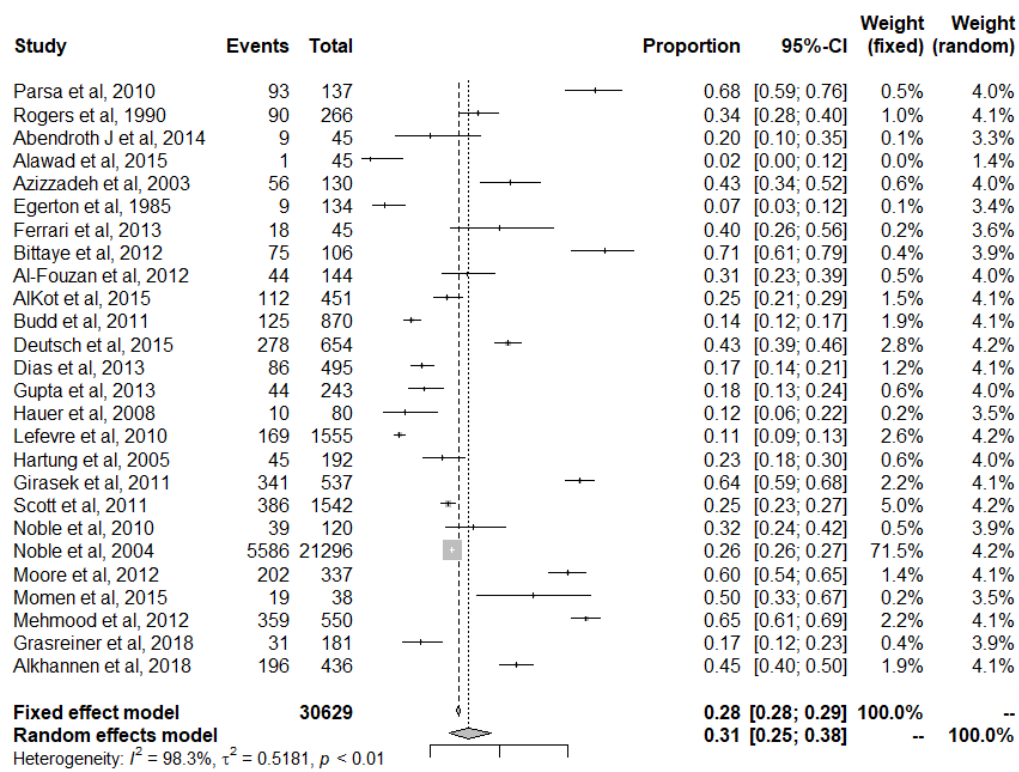

only

Figure S12. Forest Plot of “Advice from Others”.

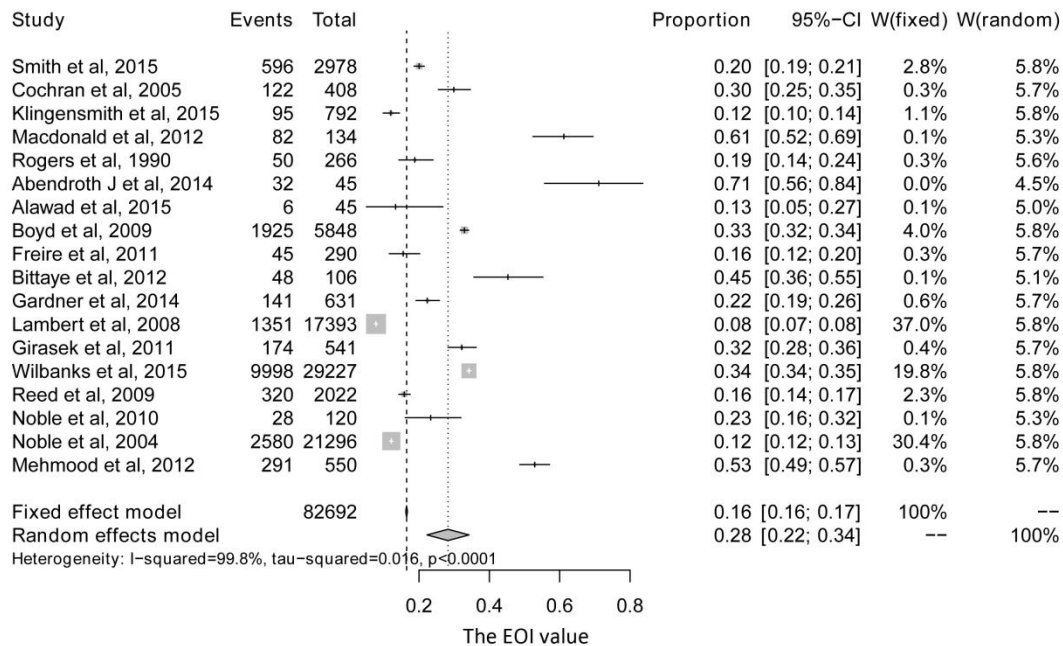

Figure S13. Forest Plot of “Student Debt”.

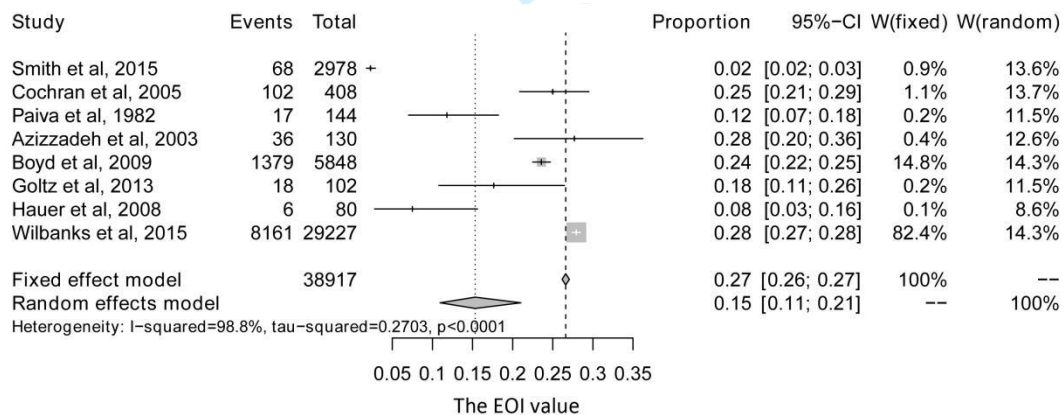

Figure S14. Funnel Plots of the Publication Bias Testing of the 12 Factors.

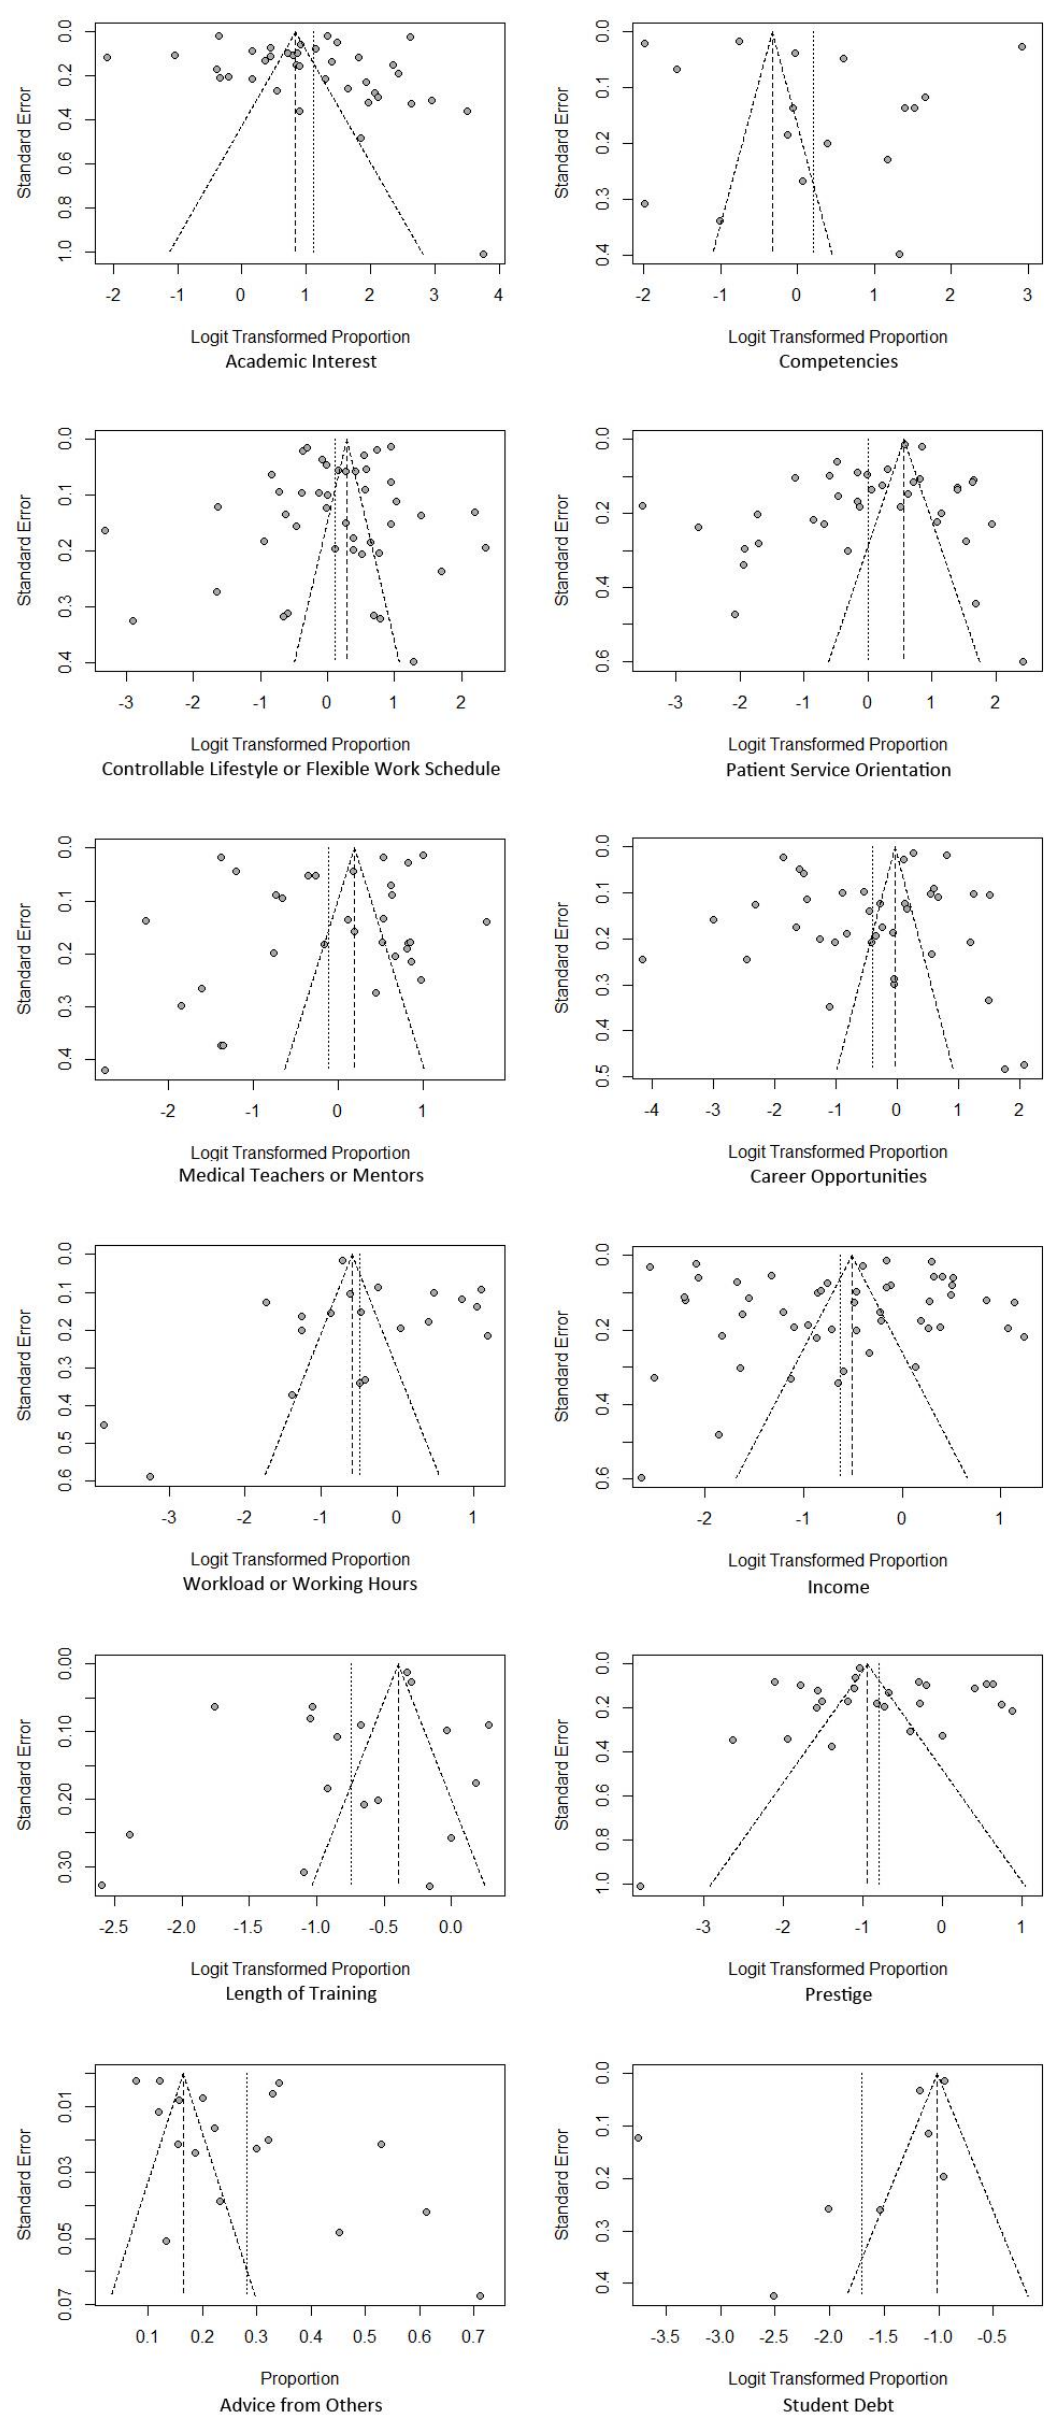

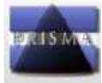

# PRISMA 2009 Checklist

| Section/topic                      | #  | Checklist item                                                                                                                                                                                                                                                                                              | Reported on page # |
|------------------------------------|----|-------------------------------------------------------------------------------------------------------------------------------------------------------------------------------------------------------------------------------------------------------------------------------------------------------------|--------------------|
| <b>TITLE</b>                       |    |                                                                                                                                                                                                                                                                                                             |                    |
| Title                              | 1  | Identify the report as a systematic review, meta-analysis, or both.                                                                                                                                                                                                                                         | 1                  |
| <b>ABSTRACT</b>                    |    |                                                                                                                                                                                                                                                                                                             |                    |
| Structured summary                 | 2  | Provide a structured summary including, as applicable: background; objectives; data sources; study eligibility criteria, participants, and interventions; study appraisal and synthesis methods; results; limitations; conclusions and implications of key findings; systematic review registration number. | 2-3                |
| <b>INTRODUCTION</b>                |    |                                                                                                                                                                                                                                                                                                             |                    |
| Rationale                          | 3  | Describe the rationale for the review in the context of what is already known.                                                                                                                                                                                                                              | 4                  |
| Objectives                         | 4  | Provide an explicit statement of questions being addressed with reference to participants, interventions, comparisons, outcomes, and study design (PICOS).                                                                                                                                                  | 5                  |
| <b>METHODS</b>                     |    |                                                                                                                                                                                                                                                                                                             |                    |
| Protocol and registration          | 5  | Indicate if a review protocol exists, if and where it can be accessed (e.g., Web address), and, if available, provide registration information including registration number.                                                                                                                               | 3                  |
| Eligibility criteria               | 6  | Specify study characteristics (e.g., PICOS, length of follow-up) and report characteristics (e.g., years considered, language, publication status) used as criteria for eligibility, giving rationale.                                                                                                      | 5                  |
| Information sources                | 7  | Describe all information sources (e.g., databases with dates of coverage, contact with study authors to identify additional studies) in the search and date last searched.                                                                                                                                  | 5                  |
| Search                             | 8  | Present full electronic search strategy for at least one database, including any limits used, such that it could be repeated.                                                                                                                                                                               | 5                  |
| Study selection                    | 9  | State the process for selecting studies (i.e., screening, eligibility, included in systematic review, and, if applicable, included in the meta-analysis).                                                                                                                                                   | 5-6                |
| Data collection process            | 10 | Describe method of data extraction from reports (e.g., piloted forms, independently, in duplicate) and any processes for obtaining and confirming data from investigators.                                                                                                                                  | 6                  |
| Data items                         | 11 | List and define all variables for which data were sought (e.g., PICOS, funding sources) and any assumptions and simplifications made.                                                                                                                                                                       | 6                  |
| Risk of bias in individual studies | 12 | Describe methods used for assessing risk of bias of individual studies (including specification of whether this was done at the study or outcome level), and how this information is to be used in any data synthesis.                                                                                      | 6-7                |
| Summary measures                   | 13 | State the principal summary measures (e.g., risk ratio, difference in means).                                                                                                                                                                                                                               | 6-7                |
| Synthesis of results               | 14 | Describe the methods of handling data and combining results of studies, if done, including measures of consistency (e.g., $I^2$ ) for each meta-analysis.                                                                                                                                                   | 7                  |



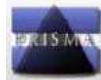

# PRISMA 2009 Checklist

Page 1 of 2

| Section/topic                 | #  | Checklist item                                                                                                                                                                                           | Reported on page # |
|-------------------------------|----|----------------------------------------------------------------------------------------------------------------------------------------------------------------------------------------------------------|--------------------|
| Risk of bias across studies   | 15 | Specify any assessment of risk of bias that may affect the cumulative evidence (e.g., publication bias, selective reporting within studies).                                                             | 7                  |
| Additional analyses           | 16 | Describe methods of additional analyses (e.g., sensitivity or subgroup analyses, meta-regression), if done, indicating which were pre-specified.                                                         | 7                  |
| <b>RESULTS</b>                |    |                                                                                                                                                                                                          |                    |
| Study selection               | 17 | Give numbers of studies screened, assessed for eligibility, and included in the review, with reasons for exclusions at each stage, ideally with a flow diagram.                                          | 5, 7               |
| Study characteristics         | 18 | For each study, present characteristics for which data were extracted (e.g., study size, PICOS, follow-up period) and provide the citations.                                                             | 7-8                |
| Risk of bias within studies   | 19 | Present data on risk of bias of each study and, if available, any outcome level assessment (see item 12).                                                                                                | 8                  |
| Results of individual studies | 20 | For all outcomes considered (benefits or harms), present, for each study: (a) simple summary data for each intervention group (b) effect estimates and confidence intervals, ideally with a forest plot. | 8                  |
| Synthesis of results          | 21 | Present results of each meta-analysis done, including confidence intervals and measures of consistency.                                                                                                  | 8-9                |
| Risk of bias across studies   | 22 | Present results of any assessment of risk of bias across studies (see Item 15).                                                                                                                          | 8-9                |
| Additional analysis           | 23 | Give results of additional analyses, if done (e.g., sensitivity or subgroup analyses, meta-regression [see Item 16]).                                                                                    | 8-9                |
| <b>DISCUSSION</b>             |    |                                                                                                                                                                                                          |                    |
| Summary of evidence           | 24 | Summarize the main findings including the strength of evidence for each main outcome; consider their relevance to key groups (e.g., healthcare providers, users, and policy makers).                     | 9-13               |
| Limitations                   | 25 | Discuss limitations at study and outcome level (e.g., risk of bias), and at review-level (e.g., incomplete retrieval of identified research, reporting bias).                                            | 13                 |
| Conclusions                   | 26 | Provide a general interpretation of the results in the context of other evidence, and implications for future research.                                                                                  | 14                 |
| <b>FUNDING</b>                |    |                                                                                                                                                                                                          |                    |
| Funding                       | 27 | Describe sources of funding for the systematic review and other support (e.g., supply of data); role of funders for the systematic review.                                                               | 15                 |

From: Moher D, Liberati A, Tetzlaff J, Altman DG, The PRISMA Group (2009). Preferred Reporting Items for Systematic Reviews and Meta-Analyses: The PRISMA Statement. PLoS Med 6(6): e1000097. doi:10.1371/journal.pmed1000097

For more information, visit: [www.prisma-statement.org](http://www.prisma-statement.org).

Page 2 of 2

For peer review only - <http://bmjopen.bmj.com/site/about/guidelines.xhtml>

## MOOSE Checklist for Meta-analyses of Observational Studies

| Item No                                     | Recommendation                                                                                                                                                                                                                                                               | Reported on Page No |
|---------------------------------------------|------------------------------------------------------------------------------------------------------------------------------------------------------------------------------------------------------------------------------------------------------------------------------|---------------------|
| Reporting of background should include      |                                                                                                                                                                                                                                                                              |                     |
| 1                                           | Problem definition                                                                                                                                                                                                                                                           | 5                   |
| 2                                           | Hypothesis statement                                                                                                                                                                                                                                                         | 5                   |
| 3                                           | Description of study outcome(s)                                                                                                                                                                                                                                              | 5                   |
| 4                                           | Type of exposure or intervention used                                                                                                                                                                                                                                        | 5                   |
| 5                                           | Type of study designs used                                                                                                                                                                                                                                                   | 5                   |
| 6                                           | Study population                                                                                                                                                                                                                                                             | 5                   |
| Reporting of search strategy should include |                                                                                                                                                                                                                                                                              |                     |
| 7                                           | Qualifications of searchers (eg, librarians and investigators)                                                                                                                                                                                                               | 6                   |
| 8                                           | Search strategy, including time period included in the synthesis and key words                                                                                                                                                                                               | 5                   |
| 9                                           | Effort to include all available studies, including contact with authors                                                                                                                                                                                                      | 5                   |
| 10                                          | Databases and registries searched                                                                                                                                                                                                                                            | 5                   |
| 11                                          | Search software used, name and version, including special features used (eg, explosion)                                                                                                                                                                                      | 6                   |
| 12                                          | Use of hand searching (eg, reference lists of obtained articles)                                                                                                                                                                                                             | 5                   |
| 13                                          | List of citations located and those excluded, including justification                                                                                                                                                                                                        | 5-6                 |
| 14                                          | Method of addressing articles published in languages other than English                                                                                                                                                                                                      | 5                   |
| 15                                          | Method of handling abstracts and unpublished studies                                                                                                                                                                                                                         | 5                   |
| 16                                          | Description of any contact with authors                                                                                                                                                                                                                                      | 5                   |
| Reporting of methods should include         |                                                                                                                                                                                                                                                                              |                     |
| 17                                          | Description of relevance or appropriateness of studies assembled for assessing the hypothesis to be tested                                                                                                                                                                   | 6                   |
| 18                                          | Rationale for the selection and coding of data (eg, sound clinical principles or convenience)                                                                                                                                                                                | 6-7                 |
| 19                                          | Documentation of how data were classified and coded (eg, multiple raters, blinding and interrater reliability)                                                                                                                                                               | 6-7                 |
| 20                                          | Assessment of confounding (eg, comparability of cases and controls in studies where appropriate)                                                                                                                                                                             | 6                   |
| 21                                          | Assessment of study quality, including blinding of quality assessors, stratification or regression on possible predictors of study results                                                                                                                                   | 6                   |
| 22                                          | Assessment of heterogeneity                                                                                                                                                                                                                                                  | 6                   |
| 23                                          | Description of statistical methods (eg, complete description of fixed or random effects models, justification of whether the chosen models account for predictors of study results, dose-response models, or cumulative meta-analysis) in sufficient detail to be replicated | 6-7                 |
| 24                                          | Provision of appropriate tables and graphics                                                                                                                                                                                                                                 | 5-7                 |
| Reporting of results should include         |                                                                                                                                                                                                                                                                              |                     |
| 25                                          | Graphic summarizing individual study estimates and overall estimate                                                                                                                                                                                                          | 8                   |
| 26                                          | Table giving descriptive information for each study included                                                                                                                                                                                                                 | 7                   |
| 27                                          | Results of sensitivity testing (eg, subgroup analysis)                                                                                                                                                                                                                       | 8                   |
| 28                                          | Indication of statistical uncertainty of findings                                                                                                                                                                                                                            | 7-9                 |

| Item No                                 | Recommendation                                                                                                            | Reported on Page No |
|-----------------------------------------|---------------------------------------------------------------------------------------------------------------------------|---------------------|
| Reporting of discussion should include  |                                                                                                                           |                     |
| 29                                      | Quantitative assessment of bias (eg, publication bias)                                                                    | 13                  |
| 30                                      | Justification for exclusion (eg, exclusion of non-English language citations)                                             | 13-14               |
| 31                                      | Assessment of quality of included studies                                                                                 | 13-14               |
| Reporting of conclusions should include |                                                                                                                           |                     |
| 32                                      | Consideration of alternative explanations for observed results                                                            | 14                  |
| 33                                      | Generalization of the conclusions (ie, appropriate for the data presented and within the domain of the literature review) | 14                  |
| 34                                      | Guidelines for future research                                                                                            | 14                  |
| 35                                      | Disclosure of funding source                                                                                              | 15                  |

From: Stroup DF, Berlin JA, Morton SC, et al, for the Meta-analysis Of Observational Studies in Epidemiology (MOOSE) Group. Meta-analysis of Observational Studies in Epidemiology. A Proposal for Reporting. *JAMA*. 2000;283(15):2008-2012. doi: 10.1001/jama.283.15.2008.

Transcribed from the original paper within the NEUROSURGERY® Editorial Office, Atlanta, GA, United States. August 2012.

# BMJ Open

## Factors Influencing Subspecialty Choice Among Medical Students: A Systematic Review and Meta-analysis

|                                 |                                                                                                                                                                                                                                                                                                                                                                                                                                                                                                                                                                                                                                                                                                                                                                                                                                                                                                                                                                                                                                                                                                          |
|---------------------------------|----------------------------------------------------------------------------------------------------------------------------------------------------------------------------------------------------------------------------------------------------------------------------------------------------------------------------------------------------------------------------------------------------------------------------------------------------------------------------------------------------------------------------------------------------------------------------------------------------------------------------------------------------------------------------------------------------------------------------------------------------------------------------------------------------------------------------------------------------------------------------------------------------------------------------------------------------------------------------------------------------------------------------------------------------------------------------------------------------------|
| Journal:                        | <i>BMJ Open</i>                                                                                                                                                                                                                                                                                                                                                                                                                                                                                                                                                                                                                                                                                                                                                                                                                                                                                                                                                                                                                                                                                          |
| Manuscript ID                   | bmjopen-2018-022097.R2                                                                                                                                                                                                                                                                                                                                                                                                                                                                                                                                                                                                                                                                                                                                                                                                                                                                                                                                                                                                                                                                                   |
| Article Type:                   | Research                                                                                                                                                                                                                                                                                                                                                                                                                                                                                                                                                                                                                                                                                                                                                                                                                                                                                                                                                                                                                                                                                                 |
| Date Submitted by the Author:   | 09-Oct-2018                                                                                                                                                                                                                                                                                                                                                                                                                                                                                                                                                                                                                                                                                                                                                                                                                                                                                                                                                                                                                                                                                              |
| Complete List of Authors:       | <p>Yang, Yahan; Sun Yat-Sen University Zhongshan Ophthalmic Center, State Key Laboratory of Ophthalmology; Sun Yat-Sen University, Zhongshan School of Medicine</p> <p>Li, Jiawei; Sun Yat-Sen University, Zhongshan School of Mathematics</p> <p>Wu, Xiaohang; Sun Yat-Sen University Zhongshan Ophthalmic Center, State Key Laboratory of Ophthalmology</p> <p>Wang, Jinghui; Sun Yat-Sen University Zhongshan Ophthalmic Center, State Key Laboratory of Ophthalmology</p> <p>Li, Wangting; Sun Yat-Sen University Zhongshan Ophthalmic Center, State Key Laboratory of Ophthalmology</p> <p>Zhu, Yi; University of Miami School of Medicine, Department of Molecular and Cellular Pharmacology; Sun Yat-Sen University Zhongshan Ophthalmic Center, Cataract</p> <p>Chen, Chuan; State Key Laboratory of Ophthalmology, Zhongshan Ophthalmic Center, Sun Yat-sen University; University of Miami School of Medicine, Department of Molecular and Cellular Pharmacology</p> <p>Lin, Haotian; State Key Laboratory of Ophthalmology, Zhongshan Ophthalmic Center, Sun Yat-sen University, Cataract</p> |
| <b>Primary Subject Heading</b>: | Medical education and training                                                                                                                                                                                                                                                                                                                                                                                                                                                                                                                                                                                                                                                                                                                                                                                                                                                                                                                                                                                                                                                                           |
| Secondary Subject Heading:      | Medical education and training                                                                                                                                                                                                                                                                                                                                                                                                                                                                                                                                                                                                                                                                                                                                                                                                                                                                                                                                                                                                                                                                           |
| Keywords:                       | Medical students, Career choice, Meta-analysis                                                                                                                                                                                                                                                                                                                                                                                                                                                                                                                                                                                                                                                                                                                                                                                                                                                                                                                                                                                                                                                           |
|                                 |                                                                                                                                                                                                                                                                                                                                                                                                                                                                                                                                                                                                                                                                                                                                                                                                                                                                                                                                                                                                                                                                                                          |

SCHOLARONE™  
Manuscripts

1  
2  
3 **1 Title Page**  
4

5 **2 Factors Influencing Subspecialty Choice Among Medical Students: A Systematic**  
6

7 **3 Review and Meta-analysis**  
8

9 4 Yahan Yang, M.D.<sup>1,2</sup>; Jiawei Li, M.D.<sup>3</sup>; Xiaohang Wu, M.D.<sup>1</sup>; Jinghui Wang, M.D.<sup>1</sup>;  
10

11 5 Wangting Li, M.D.<sup>1</sup>; Yi Zhu, M.D.<sup>1,4</sup>; Chuan Chen, M.D.<sup>1,4</sup>; Haotian Lin, M.D., Ph.  
12

13 6 D<sup>1#</sup>  
14  
15

16 7

18 **Institution:** 1. State Key Laboratory of Ophthalmology, Zhongshan Ophthalmic  
19

20 9 Center, Sun Yat-sen University, Guangzhou, Guangdong, 510060, People's Republic  
21

22 10 of China  
23

24 11 2. Zhongshan School of Medicine, Sun Yat-sen University, Guangzhou, China  
25

26 12 3. Zhongshan School of Mathematics, Sun Yat-sen University, Guangzhou, China  
27

28 13 4. Department of Molecular and Cellular Pharmacology, University of Miami Miller  
29

30 14 School of Medicine, Miami, Florida 33136, USA.  
31  
32

33 15  
34

35 **#Editorial Correspondence:**  
36

37 17 Prof. Haotian Lin  
38

39 18 Zhongshan Ophthalmic Center, Sun Yat-sen University  
40

41 19 Xian Lie South Road 54#  
42

43 20 Guangzhou, China, 510060.  
44

45 21 Telephone number: +86-020-87330493  
46

47 22 Fax: +86-020-87333271  
48

49 23 E-mail: haot.lin@hotmail.com  
50

51 24 Word count for text: 3122  
52  
53

54 25  
55  
56

1  
2  
3 26 **ABSTRACT**

4  
5 27 **Objective** To characterize the contributing factors that affect medical students'

6  
7 28 subspecialty choice and to estimate the extent of influence of individual

8  
9 29 factors on the students' decision-making process.

10  
11 30 **Design** Systematic review and meta-analysis.

12  
13 31 **Methods** A systematic search of the Cochrane Library, ERIC, Web of Science, CNKI

14  
15 32 and PubMed databases was conducted for studies published between January

16  
17 33 1977 and June 2018. Information concerning study characteristics, influential

18  
19 34 factors, and the extent of their influence (EOI) was extracted independently

20  
21 35 by two trained investigators. EOI is the percentage level that describes how

22  
23 36 much each of the factors influenced students' choice of subspecialty. The

24  
25 37 recruited medical students includes students in medical school, internship,

26  
27 38 residency training and fellowship, who are about to or have just made a

28  
29 39 specialty choice. The estimates were pooled using a random-effects

30  
31 40 meta-analysis model due to the between-study heterogeneity.

32  
33 41 **Results** Data were extracted from 75 studies (882,209 individuals). Overall, the

34  
35 42 factors influencing medical students' choice of subspecialty training mainly

36  
37 43 included academic interests (75.29%), competencies (55.15%), controllable

38  
39 44 lifestyles or flexible work schedules (53.00%), patient service orientation

40  
41 45 (50.04%), medical teachers or mentors (46.93%), career opportunities

42  
43 46 (44.00%), workload or working hours (37.99%), income (34.70%), length of

44  
45 47 training (32.30%), prestige (31.17%), advice from others (28.24%), and

46  
47 48 student debt (15.33%), with significant between-study heterogeneity

48  
49 49 ( $P<0.0001$ ). Subgroup analyses revealed that the EOI of academic interests

50  
51 50 was higher in developed countries than that in developing countries (79.66%

1  
2  
3 51 [95% confidence interval (CI), 70.73%; 86.39%] vs. 60.41% [95% CI,  
4  
5 52 43.44%; 75.19%];  $Q=3.51$   $P=0.02$ ). The EOI value of prestige was lower in  
6  
7 53 developed countries than that in developing countries (23.96% [95% CI,  
8  
9 54 19.20%; 29.47%] vs. 47.65% [95% CI, 34.41%; 61.24%];  $Q=4.71$   $P=0.01$ ).

11 **Conclusions** This systematic review and meta-analysis provided a quantitative  
12  
13  
14 56 evaluation of the top 12 influencing factors associated with medical students'  
15  
16 57 choice of subspecialty. Our findings provide the basis for the development of  
17  
18 58 specific, effective strategies to optimize the distribution of physicians among  
19  
20 59 different departments by modifying these influencing factors.

22 60 **Systematic review registration** PROSPERO CRD42017053781.

## 61 **STRENGTHS AND LIMITATIONS OF THIS STUDY**

- 26  
27 62 ● This is the first study that provide a systematic estimate of the factors associated  
28  
29 63 with medical students' subspecialty choices.
- 31 64 ● A large number of studies conducted in varied populations have been included.
- 33 65 ● The differences in the characteristics of country, survey years, specialty, the type  
34  
35 66 of data used and sample size across studies represent a major limitation of our  
36  
37 67 study.

39  
40 68 **KEYWORDS** Medical students, career choice, meta-analysis

41  
42 69

43  
44 70

45  
46 71

## 72 Introduction

73 Because of the population aging, increased workload on doctors through increased  
74 number of consultations and in managing patients with multi-morbidity, the demand  
75 for physicians continues to increase; however, an imbalance in the supply of  
76 physicians in different subspecialties has become a growing concern in both  
77 developed and developing countries.<sup>1-5</sup> Some specialties and subspecialties, such as  
78 family medicine and palliative medicine,<sup>6,7</sup> are experiencing a desperate shortage of  
79 physicians, whereas other specialties and subspecialties, such as cardiology,  
80 ophthalmology and ear, nose and throat (ENT) surgery, are highly competitive  
81 specialties with low success rate for candidates.<sup>8,9</sup>

82 Specialty choice is the product of a complex interconnection of student expectation,  
83 department expectation, and competition for available spots, and student choice is  
84 where the choice begins.<sup>10</sup> Previous studies have suggested that medical students'  
85 choice of subspecialty is essential to the maintenance of an adequate medical  
86 workforce and a balanced development of the medical system.<sup>11,12</sup> However, the  
87 influencing factors underlying students' subspecialty choice have not been  
88 systemically reviewed. Recent changes in the training and practice environment may  
89 influence medical students' career choice.<sup>13</sup> Additionally, the variability in  
90 preferences over time and in students' attitudes towards career choices can further  
91 complicate this assessment. For example, a study in the UK indicated that half of the  
92 medical students made a definitive subspecialty choice during their first year of  
93 medical school.<sup>14</sup> However, students were prone to changing their subspecialty  
94 preference during medical school and internship.<sup>15</sup> Notably, students may also reject  
95 certain subspecialties during their medical school training, even those they have  
96 previously seriously considered.<sup>16</sup> Therefore, identifying the factors that influence



1  
2  
3 97 students' choice of subspecialty will enable a better understanding of the current  
4  
5 98 shortage/overload of physicians in specific fields and contribute to policy-building  
6  
7 99 and decision-making to improve the training and recruitment of students in the future.  
8  
9  
10 100 We thus conducted a systematic review and a meta-analysis to investigate the  
11  
12 101 influencing factors and the extent of their influence on the choice of subspecialty  
13  
14 102 training among medical students. More specifically, we focused on the following  
15  
16 103 questions. First, can we gain a better understanding of students' preferences for  
17  
18 104 medical specialty according to the primary influencing factor? Second, do the  
19  
20 105 subgroups according to world region and survey years examined in this study differ  
21  
22 106 significantly with regard to the weight that students place on the identified  
23  
24 107 influencing factor?

## 26 27 108 **Methods**

28  
29 109 We developed a review protocol (registration number: PROSPERO  
30  
31 110 CRD42017053781) prior to commencing the study. The Preferred Reporting Items  
32  
33 111 for Systematic Reviews and Meta-Analyses (PRISMA) guidelines was used to ensure  
34  
35 112 the reporting quality of this review (Fig. S1).<sup>17</sup>

### 36 37 113 **Search Strategy and Study Eligibility**

38  
39 114 We performed a literature search in June 2018 using the Cochrane Library, Medline,  
40  
41 115 Web of Science, CNKI and ERIC databases without language restrictions. Articles  
42  
43 116 were screened by title, abstract and reference list, and by correspondence with study  
44  
45 117 investigators. Potentially relevant papers were first identified by reviewing the titles  
46  
47 118 and abstracts, and the full text of each retrieved article was then assessed. A detailed  
48  
49 119 example of search strategy for Medline/PubMed is shown in **Methods S1**. Studies  
50  
51 120 were included if they were systematic review or cross-sectional studies, reported data  
52  
53 121 on medical students, were published in peer-reviewed journals, and used a validated  
54  
55

1  
2  
3 122 method to assess the extent of a factor's influence on the choice of subspecialty, such  
4  
5 123 as pediatric gastroenterology and vascular surgery, or its corresponding specialty,  
6  
7 124 such as pediatrics and surgery. Because of the differences between medical education  
8  
9 125 systems in the world, the medical students we recruited includes the student in  
10  
11 126 medical school, internship, residency training and fellowship, containing the students  
12  
13 127 who about to make a specialty choice and students who has just made a specialty  
14  
15 128 choice. A guide to medical specialty, available at  
16  
17 129 <https://www.abms.org/member-boards/specialty-subspecialty-certificates/>, were used  
18  
19 130 to identify the medical specialty and subspecialty of our research. We also conducted  
20  
21 131 an additional search using OpenGrey. However, no additional articles were further  
22  
23 132 included. All searches were performed using Google chrome (version 54.0.2840).

### 26 133 **Data Extraction and Quality Assessment**

27  
28  
29 134 Each article was reviewed by two trained investigators (Y.Y. and J.L.) and the  
30  
31 135 following information was independently extracted from each selected article using a  
32  
33 136 standardized form: study design, geographic location, years of survey, journal,  
34  
35 137 sample size, average age of the participants, the number and percentage of male  
36  
37 138 participants, and the influencing factors and the extent of their influence. A third  
38  
39 139 investigator was consulted if disagreements occurred. Each study may involve one or  
40  
41 140 several influencing factors. An 11-item checklist which was recommended by Agency  
42  
43 141 for Healthcare Research and Quality (AHRQ), used for cross-sectional studies<sup>18</sup>,  
44  
45 142 available at <https://www.ncbi.nlm.nih.gov/books/NBK35156/>, were used to assess the  
46  
47 143 quality of the studies. All discrepancies were resolved via discussion and consensus.

### 50 144 **Statistical Analysis**

51  
52  
53 145 As considerable heterogeneity was expected because of the multiple sources of  
54  
55 146 variances, a random effects meta-analysis model was used to estimate the influencing

1  
2  
3 147 factors and the extent of their influence.<sup>19</sup> Between-study heterogeneity was assessed  
4  
5 148 using the Cochran's Q-test, and was quantified with the  $I^2$  statistic, which was  
6  
7 149 calculated to describe the percentage of total variation caused by heterogeneity across  
8  
9 150 studies, with  $\geq 50\%$  indicating considerable heterogeneity.<sup>20 21</sup> Potential sources of  
10  
11 151 heterogeneity were identified using meta-regression.<sup>22</sup> Four categorical covariates  
12  
13 152 were defined as potential sources of heterogeneity by examining the studies  
14  
15 153 conducted in the United States (US) vs. the studies conducted in other countries, the  
16  
17 154 studies conducted before 2010 vs. those conducted after 2010, the studies concerning  
18  
19 155 subspecialty only vs. those that were not specific to a subspecialty, and the studies  
20  
21 156 with a sample size  $< 200$  vs. the studies with a sample size  $\geq 200$ . Subgroup analyses  
22  
23 157 were performed for each factor in the studies in developed countries vs. developing  
24  
25 158 countries and studies conducted before 2010 vs. after 2010. The EOI value of  
26  
27 159 competencies in developing countries was not statistically significant (81.21% [95%  
28  
29 160 CI, 75.27%; 86.51%],  $P=0.1436$ ), and no studies on the influence of student debt in  
30  
31 161 developing countries were found. The Q-test based on the analysis of variance was  
32  
33 162 used to compare the subgroups, with a significance threshold of 5%.<sup>23</sup> The influence  
34  
35 163 of individual studies on the overall EOI value was explored by serially excluding  
36  
37 164 each study in a sensitivity analysis. Publication bias was investigated using a funnel  
38  
39 165 plot test and Egger's test.<sup>24 25</sup> Fill and trim approach, which imputes estimates from  
40  
41 166 hypothetical negative unpublished reports,<sup>26</sup> was also used to investigate the  
42  
43 167 publication bias if the Egger's test was significant. All analyses were performed  
44  
45 168 using R (version 3.3.1, The R Foundation, Vienna, Austria). The statistical tests were  
46  
47 169 2-sided with a significance threshold of  $P < 0.05$ .

52 **Patient and public involvement:** Patients and the public were not involved in  
53  
54 171 development of the research question and outcome measures, nor the study design.

1  
2  
3 172 The study does not involve patient recruitment, and patients were not involved in  
4  
5 173 conduct of the study. We plan to liaise closely with patients, special interest groups,  
6  
7 174 and charities in the dissemination of our results in printed and electronic media.  
8

## 9 175 **Results**

### 10 176 **Study Characteristics**

11  
12  
13 177 Seventy-five cross-sectional studies involving a total of 882,209 individuals that  
14  
15 178 published between January 1977 and May 2018 were included in the present research  
16  
17 179 **(Table 1)**. Thirty-four studies were conducted in North America, 24 in Europe, 7 in  
18  
19 180 Asia, 5 in Oceania, 3 in Africa, and 2 in South America. The median number of  
20  
21 181 participants per study was 243 (range 37-29,227). Fourteen studies included students  
22  
23 182 who had already selected subspecialties, whereas 61 did not. The influencing factors  
24  
25 183 were ranked according to the frequency of occurrence and each factor was identified  
26  
27 184 when at least 5 papers were available describing it. The influencing factors for  
28  
29 185 subspecialty choice were then classified according to 17 aspects, including academic  
30  
31 186 interests, controllable lifestyle or flexible work schedule (defined as flexibility that  
32  
33 187 allows physicians to control the number of hours devoted to practicing the specialty),  
34  
35 188 competencies, patient service orientation, medical teachers or mentors, career  
36  
37 189 opportunities, workload or working hours (characterized by the physician's time  
38  
39 190 spent on professional responsibilities), income, prestige, length of training, advice  
40  
41 191 from others (advice from family, friends, and other students), student debt,  
42  
43 192 experience with the subject, working environment, personality, gender and job  
44  
45 193 security. Personality and gender are common factors that affect the choice of  
46  
47 194 subspecialty among medical students, but most of the relevant literature has not  
48  
49 195 reported on the extent of these factors' influence. Moreover, the funnel plots were  
50  
51 196 clearly asymmetrical with regard to experience with the subject, the working  
52  
53  
54  
55  
56  
57  
58  
59  
60

1  
2  
3 197 environment and job variety, indicating the existence of publication bias. Thus, the  
4  
5 198 analysis of the remaining 12 influencing factors were shown in this paper. Studies  
6  
7 199 assessed for influencing factors using questionnaires validated to medical students  
8  
9 200 asking the extent of certain factors the studies investigated. Quality assessment scores  
10  
11 201 for the included studies are listed in **Table 1**. None of the studies received a point for  
12  
13 202 the second AHRQ Quality Indicator, which requires studies to list the inclusion and  
14  
15 203 exclusion criteria for exposed and unexposed subjects (cases and controls) or refer to  
16  
17 204 previous publications, since no comparison studies were referenced in the analyzed  
18  
19 205 articles. For the remaining 10 criteria, 6 studies received 9 points, 8 studies received  
20  
21 206 8 points, 17 studies received 7 points, 33 studies received 6 points, 9 studies received  
22  
23 207 5 points and 2 studies received 4 points (scores for individual studies are presented in  
24  
25 208 **Table S1**).

### 29 **Primary Analysis**

30  
31 210 A meta-analysis was performed on the 12 influencing factors (**Table 2**): academic  
32  
33 211 interests (**Fig. S2**), competencies (**Fig. S3**), controllable lifestyle or flexible work  
34  
35 212 schedule (**Fig. S4**), patient service orientation (**Fig. S5**), medical teachers or mentors  
36  
37 213 (**Fig. S6**), career opportunities (**Fig. S7**), workload or working hours (**Fig. S8**),  
38  
39 214 income (**Fig. S9**), length of training (**Fig. S10**), prestige (**Fig. S11**), advice from  
40  
41 215 others (**Fig. S12**) and student debt (**Fig. S13**). All the factors were significant with  
42  
43 216 evidence of between-study heterogeneity ( $P < 0.0001$ ). A sensitivity analysis, in which  
44  
45 217 the meta-analysis was serially repeated after the exclusion of each study,  
46  
47 218 demonstrated that no individual study affected the overall extent of a factor's  
48  
49 219 influence.

### 52 **Meta-regression and Subgroup Analysis**

53  
54  
55 221 We performed meta-regression to identified the potential sources of heterogeneity

1  
2  
3 222 using common instructions when at least 5 studies were available and at least 2  
4  
5 223 studies were in each comparator subgroup (**Table 3**). Some of the heterogeneities  
6  
7 224 observed among the 12 factors can be partially explained by country, survey years,  
8  
9 225 specialty and sample size.  
10  
11 226 EOI values were further analyzed by subgroup (**Table S2**) according to world region  
12  
13 227 (**Fig. 1**) and survey year (**Fig. 2**). The EOI value of academic interests in developed  
14  
15 228 countries was higher than that in developing countries (79.66% [95% CI, 70.73%;  
16  
17 229 86.39% vs. 60.41% [95% CI, 43.44%; 75.19%];  $Q=3.51$   $P=0.02$ ). Conversely, a  
18  
19 230 lower EOI value of prestige was found in studies conducted in developed countries  
20  
21 231 than in developing countries (23.96% [95% CI, 19.20%; 29.47%] vs. 47.65% [95%  
22  
23 232 CI, 34.41%; 61.24%];  $Q=4.71$   $P=0.01$ ). No statistically significant subgroup  
24  
25 233 differences in the EOI values of the other influencing factors were noted between  
26  
27 234 developed countries and developing countries. In addition, no statistically significant  
28  
29 235 differences in the EOI values of the influencing factors were observed when  
30  
31 236 subgroup analysis was performed by survey year.

### 237 **Assessment of Publication Bias**

32  
33  
34  
35  
36  
37 238 We generated a funnel plot with proportion as the abscissa and standard error as the  
38  
39 239 ordinate. A visual inspection of the funnel plots revealed minimal asymmetry among  
40  
41 240 the various influencing factors (**Fig. S14**), and the results were concentrated in the  
42  
43 241 narrow upper part of the graph. There was evidence of small study effect in the  
44  
45 242 meta-analysis of “patient service orientation” (Egger’s test  $P=0.02$ ). However, the  
46  
47 243 trim-and-fill method showed the publication-bias corrected estimate remained  
48  
49 244 statistically significant (63.79%, 95% CI, 58.20%; 69.04%).

### 245 **Discussion**

### 246 **Implications**

1  
2  
3 247 This systematic review and meta-analysis involved 75 studies with 882,209 medical  
4  
5 248 students. Twelve influencing factors were analyzed. These factors can be classified  
6  
7 249 into two categories: economic factors and non-economic factors. We found that the  
8  
9 250 EOI of the economic factors, including income (34.70%) and student debt (15.33%),  
10  
11 251 may not depend on the region's level of economic development. However, income  
12  
13 252 remained a major influencing factor in the process of choosing a specialty or  
14  
15 253 subspecialty. In the US, 15% of full-time family medicine physicians earned less than  
16  
17 254 \$100,000 in 2004, which is significantly less than the income earned by invasive  
18  
19 255 cardiologists (median income=\$427,815), neurosurgeons (median income=\$211,094),  
20  
21 256 and orthopedists (median income=\$335,646).<sup>27</sup> This economic inequality made  
22  
23 257 family medicine less attractive to medical school graduates.<sup>28</sup> Benefits such as health  
24  
25 258 insurance and tuition reimbursement have been shown to be the most common  
26  
27 259 economic incentives used to attract applicants.<sup>29</sup>  
28  
29  
30  
31 260 The non-economic factors can be divided into individual factors, specialty-related  
32  
33 261 factors and others. First, individual factors, including academic interest and  
34  
35 262 competencies, have a considerable impact on students' subspecialty choice, with EOI  
36  
37 263 values of 75.29% and 55.15%, respectively. In addition, in the subgroup analysis,  
38  
39 264 although academic interests were less influential in developing countries than in  
40  
41 265 developed countries (79.66% [95% CI, 70.73%; 86.39% vs. 60.41% [95% CI,  
42  
43 266 43.44%; 75.19%];  $Q=3.51$   $P=0.02$ ), they were still the most influential of the 12  
44  
45 267 factors regardless of regional economic level. These findings indicate that  
46  
47 268 subspecialties with a shortage of manpower may attract more students by increasing  
48  
49 269 students' interests and improving the quality of education. Previous studies indicated  
50  
51 270 that early specialty exposure in medical education may arouse students' academic  
52  
53 271 interest and improve their clinical competence.<sup>28 30</sup> For example, an elective

1  
2  
3 272 extracurricular program designed to facilitate early contact with family medicine  
4  
5 273 physicians was found to significantly improve students' interest and clinical skills,  
6  
7 274 especially communication skills, in family medicine.<sup>31</sup> Furthermore, dispelling myths  
8  
9 275 and espousing the positive aspects of a discipline may provide a better understanding  
10  
11 276 of certain specialties; this approach could also be effective in increasing students'  
12  
13 277 academic interest.<sup>32</sup> For instance, family medicine is often considered a discipline  
14  
15 278 that requires less professional skills and knowledge. This misconception demotivates  
16  
17 279 students from choosing family medicine as their future career specialty, and this trend  
18  
19 280 may eventually lead to a shortage of family physicians.<sup>32</sup> Eliminating such prejudices  
20  
21 281 may help students pay greater attention to the areas in short supply and restore their  
22  
23 282 interests in other specialties.

24  
25  
26 283 Second, the specialty-related factors included controllable lifestyle/flexible work  
27  
28 284 schedule (EOI of 53.00%), career opportunities (EOI of 44.00%), workload (EOI of  
29  
30 285 37.99%) and training length (EOI of 32.30%). Of these factors, lifestyle varied  
31  
32 286 between different areas. Additionally, although certain specialties, such as general  
33  
34 287 surgery, seem to have an adequate number of surgeons on a per capita basis in the US,  
35  
36 288 there is still a poor geographic distribution within the surgical workforce according to  
37  
38 289 the type of surgical practice.<sup>33</sup> The inflexible lifestyle is a common reason that  
39  
40 290 students perceive surgery to be less attractive.<sup>33</sup> Reorganization of expected work  
41  
42 291 hours within shared practices and the increased use of physician extenders and  
43  
44 292 technologies such as electronic medical records may give physicians more flexibility  
45  
46 293 in work schedules.<sup>34</sup> Moreover, providing promotion opportunities and shortening the  
47  
48 294 length of training are possible strategies to recruit new staff in subspecialties that  
49  
50 295 require a long period of post-graduate residency training, such as neurosurgery.<sup>35</sup>

51  
52  
53 296 Finally, other factors such as service orientation (EOI of 50.74%), medical teachers



1  
2  
3 297 or mentors (EOI of 46.93%), prestige (EOI of 34.68%), and advice from others (EOI  
4  
5 298 of 28.24%) also contribute to the decision-making process of medical students. For  
6  
7 299 example, the desire to care for patients with end-stage diseases contributed to the  
8  
9 300 decision to enter palliative medicine in 86% of the medical students.<sup>7</sup> Additionally,  
10  
11 301 exposure to mentors in a particular clinical field such as internal medicine has been  
12  
13 302 strongly associated with medical students' choice of clinical field.<sup>36</sup> Moreover,  
14  
15 303 improving the occupational prestige of areas such as family medicine, pathology, and  
16  
17 304 radiology may help reshape the distribution of the workforce.<sup>30 37 38</sup>

18  
19  
20 305 In our study, several findings are especially noteworthy. First, interest was far more  
21  
22 306 important than income in deciding subspecialty. In our study, interest was the  
23  
24 307 top-ranked influencing factor (EOI of 75.29%) of subspecialty choice, while income  
25  
26 308 was ranked lower (EOI of 34.70%). This finding argues against the possible default  
27  
28 309 belief that raising physician's wages alone could solve the uneven distribution of  
29  
30 310 clinicians among subspecialties. Our findings highlight that cultivating and  
31  
32 311 stimulating students' professional interests may help improve the maldistribution of  
33  
34 312 medical resources in a more efficient and cost-saving manner.

35  
36  
37 313 Second, improving abilities in a certain subspecialty of interest can greatly affect  
38  
39 314 medical students' professional choice. In our study, competencies ranked second in  
40  
41 315 influence, which may reflect the impact of admission conditions on students' choice  
42  
43 316 of subspecialty. Hence, to reduce the risk that students are restricted to the  
44  
45 317 subspecialty of their interest due to a lack of personal skills, medical education  
46  
47 318 should focus more on enhancing students' personal competencies in addition to their  
48  
49 319 academic interests.

50  
51  
52 320 Third, balancing medical resources is a complex process in practical terms, as the  
53  
54 321 influencing factors are not mutually exclusive. The shortage of physicians in certain

1  
2  
3 322 subspecialties may increase physician workload, resulting in less time for teaching.  
4  
5 323 Hence, the quality of teaching cannot be guaranteed, and students may tend to avoid  
6  
7 324 choosing these subspecialties, thus worsening the imbalance in the medical  
8  
9 325 workforce. Additionally, some of the 12 factors identified are not amenable to  
10  
11 326 practical interventions. For example, prestige cannot be immediately increased using  
12  
13 327 interventional strategies.<sup>37</sup> Overall, effective strategies must be multi-pronged and  
14  
15 328 incorporate several different aspects, and maldistribution in the workforce should not  
16  
17 329 be tackled through a simple adjustment of one influencing factor.

### 330 **Interpretations of the results of this meta-analysis**

331 Our meta-regression stratified by the study-level characteristics found that country,  
332 survey years, subspecialty and sample size may contribute to the heterogeneity  
333 between studies. There was no significant difference in the sensitivity analysis, which  
334 indicated that the results of the meta-analysis were convincing. The funnel plots and  
335 Egger's tests revealed that most of the publication bias was small ( $P>0.05$ ), except  
336 for the meta-analysis of "patient service orientation". Moreover, the majority of the  
337 studies collected in the database were from developed countries rather than  
338 developing countries.

### 339 **Limitations**

340 Several limitations should be considered when interpreting the findings of this study.  
341 First, the students involved in our study included medical students at different stages  
342 of their medical education. Students' perception about different subspecialties may  
343 change during medical training until the students applies for specialty training. For  
344 example, compared to an intern, a freshman student may place greater emphasis on  
345 income and prestige when considering a career choice.<sup>39</sup> A subgroup analysis  
346 stratified by the stages of medical education and a secondary meta-analysis of

1  
2  
3 347 longitudinal studies may better reflect changes in influencing factors and the extent  
4  
5 348 of their influence over time. Second, our meta-analysis summarized the data from  
6  
7 349 different geographic regions around the world, and the general conclusions may not  
8  
9 350 be appropriate to guide policy development in each region. Enhanced effort is needed  
10  
11 351 to develop specific intervention strategies according to the specific economic level,  
12  
13 352 religious beliefs, healthcare system, educational system and endemic diseases of  
14  
15 353 different countries and regions. Subgroup analysis stratified by organizational and  
16  
17 354 medical training factors would provide more information of the factors influencing  
18  
19 355 subspecialty choice among medical students. Third, the surveys in the various studies  
20  
21 356 were also conducted using different methods. Most of the questionnaires used a  
22  
23 357 Likert scale. Therefore, when we converted the results to a percentage representing  
24  
25 358 the extent of a factor's influence, the Likert scale items were treated as interval  
26  
27 359 data.<sup>40-42</sup> Consequently, there may have been differences in the conversion process.  
28  
29 360 Finally, the analysis relied on aggregated published data. A multicenter prospective  
30  
31 361 study would provide more accurate estimate of the influencing factors and the extent  
32  
33 362 of their influence on medical students' choice of subspecialty.  
34  
35  
36

### 363 **Conclusion**

364 In conclusion, this systematic review and meta-analysis provided a summary  
365 evaluation of 12 influencing factors and the extent of their influence on the choice of  
366 subspecialty training among medical students. Understanding students' attitudes  
367 toward their subspecialty decision-making process could provide the basis for  
368 developing strategies to increase the attractiveness of subspecialties experiencing a  
369 shortage of manpower, thereby balancing the distribution of medical recourses.

1  
2  
3 370 **Contributors:** Haotian Lin contributed to the conceptualizing and design of the study,  
4  
5 371 and to research funding, coordinated the research and oversaw the project. Yahan  
6  
7 372 Yang, Jiawei Li and Xiaohang Wu contributed to data collection and interpretation,  
8  
9 373 and to data analysis. Jinghui Wang, Yi Zhu, Chuan Chen and Wangting Li contributed  
10  
11 374 to the design of the study. All authors contributed to the drafting and revision of the  
12  
13 375 paper and approved the final manuscript for publication. No patients or the public  
14  
15 376 were involved in the development and design of this research.

16  
17  
18 377 **Funding:** The principal investigator of this study (Haotian Lin) is currently  
19  
20 378 supported by National key R & D project (2018YFC010302), the Key Research Plan  
21  
22 379 for the National Natural Science Foundation of China Cultivation Project (91546101),  
23  
24 380 the National Natural Science Foundation of China (81770967), the Fundamental  
25  
26 381 Research Funds for the Central Universities (16ykjc28), the Guangdong Provincial  
27  
28 382 Natural Science Foundation for Distinguished Young Scholars of China  
29  
30 383 (2014A030306030), the Guangdong Province Universities and Colleges Youth Pearl  
31  
32 384 River Scholar Funded Scheme (2016), the Clinical Research and Translational  
33  
34 385 Medical Center of Pediatric Cataract in Guangzhou City (201505032017516), and  
35  
36 386 Ministry of Science and Technology of China Grants (2015CB964600). These  
37  
38 387 sponsors and funding organizations had no role in the design or performance of this  
39  
40 388 study.

41  
42  
43  
44 389 **Competing Interests:** The authors declare no competing financial interests.

45  
46 390 **Data sharing:** Extracted data are available upon request to the corresponding author.

47  
48 391

392 **References**

- 393 1. Zurn P, Dal Poz MR, Stilwell B, et al. Imbalance in the health workforce. *Hum Resour Health*  
394 2004;2(1):13. doi: 10.1186/1478-4491-2-13
- 395 2. Diallo K, Zurn P, Gupta N, et al. Monitoring and evaluation of human resources for health: an  
396 international perspective. *Hum Resour Health* 2003;1(1):3. doi: 10.1186/1478-4491-1-3
- 397 3. Anderson GF, Hussey PS. Population aging: A comparison among industrialized countries. *Health*  
398 *Affair* 2000;19(3):191-203. doi: DOI 10.1377/hlthaff.19.3.191
- 399 4. Hobbs FDR, Bankhead C, Mukhtar T, et al. Clinical workload in UK primary care: a retrospective  
400 analysis of 100 million consultations in England, 2007-14. *Lancet* 2016;387(10035):2323-30.  
401 doi: 10.1016/S0140-6736(16)00620-6
- 402 5. Reeve J, Blakeman T, Freeman GK, et al. Generalist solutions to complex problems: generating  
403 practice-based evidence - the example of managing multi-morbidity. *Bmc Fam Pract* 2013;14  
404 doi: Artn 112  
405 10.1186/1471-2296-14-112
- 406 6. Bodenheimer T. Primary care--will it survive? *N Engl J Med* 2006;355(9):861-4. doi:  
407 10.1056/NEJMp068155
- 408 7. LeGrand SB, Heintz JB. Palliative Medicine Fellowship: A Study of Resident Choices. *Journal of*  
409 *Pain and Symptom Management* 2012;43(3):558-68. doi:  
410 10.1016/j.jpainsymman.2011.04.018
- 411 8. Kim YY, Kim UN, Kim YS, et al. Factors associated with the specialty choice of Korean medical  
412 students: a cross-sectional survey. *Human Resources for Health* 2016;14:8. doi:  
413 10.1186/s12960-016-0141-8
- 414 9. McNally SA. Competition ratios for different specialties and the effect of gender and immigration  
415 status. *J R Soc Med* 2008;101(10):489-92. doi: 10.1258/jrsm.2008.070284
- 416 10. Reed VA, Jernstedt GC, Reber ES. Understanding and improving medical student specialty choice:  
417 a synthesis of the literature using decision theory as a referent. *Teach Learn Med*  
418 2001;13(2):117-29. doi: 10.1207/S15328015TLM1302\_7
- 419 11. Al-Ansari SS, Khafagy MA. FACTORS AFFECTING THE CHOICE OF HEALTH SPECIALTY  
420 BY MEDICAL GRADUATES. *Journal of Family & Community Medicine*  
421 2015;13(3):119-23.
- 422 12. Leduc N, Vanasse A, Scott I, et al. The career decision-making process of medical students and  
423 residents and the choice of specialty and practice location: how does Postgraduate Medical  
424 Education fit in? 2011
- 425 13. Delamothe T. Modernising Medical Careers: final report. *BMJ* 2008;336(7635):54-55.
- 426 14. Goldacre MJ, Laxton L, Harrison EM, et al. Early career choices and successful career progression  
427 in surgery in the UK: prospective cohort studies. *Bmc Surgery* 2010;10:11. doi:  
428 10.1186/1471-2482-10-32
- 429 15. Weissman C, Zisk-Rony RY, Schroeder JE, et al. Medical specialty considerations by medical  
430 students early in their clinical experience. *Isr J Health Policy Res* 2012;1(1):13. doi:  
431 10.1186/2045-4015-1-13
- 432 16. Jackson C, Ball J, Hirsh W, et al. Informing choices: the need for career advice in medical training.  
433 *Cambridge: National institute for careers Education and Counseling* 2003
- 434 17. Moher D, Liberati A, Tetzlaff J, et al. Preferred reporting items for systematic reviews and  
435 meta-analyses: the PRISMA statement. *J Clin Epidemiol* 2009;62(10):1006-12. doi:  
436 10.1016/j.jclinepi.2009.06.005
- 437 18. Rostom A, Dube C, Cranney A, et al. Celiac disease. *Evid Rep Technol Assess (Summ)*  
438 2004(104):1-6. [published Online First: 2004/09/07]
- 439 19. Borenstein M, Hedges LV, Higgins JP, et al. A basic introduction to fixed-effect and random-effects  
440 models for meta-analysis. *Res Synth Methods* 2010;1(2):97-111. doi: 10.1002/jrsm.12
- 441 20. Higgins JP, Thompson SG, Deeks JJ, et al. Measuring inconsistency in meta-analyses. *BMJ*  
442 2003;327(7414):557-60. doi: 10.1136/bmj.327.7414.557
- 443 21. Higgins JP, Thompson SG. Quantifying heterogeneity in a meta-analysis. *Stat Med*  
444 2002;21(11):1539-58. doi: 10.1002/sim.1186
- 445 22. Sterne JA, Juni P, Schulz KF, et al. Statistical methods for assessing the influence of study  
446 characteristics on treatment effects in 'meta-epidemiological' research. *Stat Med*  
447 2002;21(11):1513-24. doi: 10.1002/sim.1184
- 448 23. Borenstein M, Hedges LV, Higgins J, et al. Criticisms of meta - analysis. *Introduction to*  
449 *meta-analysis* 2009:377-87.
- 450 24. Egger M, Davey Smith G, Schneider M, et al. Bias in meta-analysis detected by a simple,

- graphical test. *BMJ* 1997;315(7109):629-34.
25. Sterne JA, Egger M. Funnel plots for detecting bias in meta-analysis: guidelines on choice of axis. *J Clin Epidemiol* 2001;54(10):1046-55.
26. Duval S, Tweedie R. Trim and fill: A simple funnel-plot-based method of testing and adjusting for publication bias in meta-analysis. *Biometrics* 2000;56(2):455-63. [published Online First: 2000/07/06]
27. Bodenheimer T, Berenson RA, Rudolf P. The primary care-specialty income gap: why it matters. *Annals of internal medicine* 2007;146(4):301-6.
28. Bodenheimer T, Pham HH. Primary care: current problems and proposed solutions. *Health Aff (Millwood)* 2010;29(5):799-805. doi: 10.1377/hlthaff.2010.0026
29. Association AH. The hospital workforce shortage: Immediate and future. *Trend Watch* 2001;3(2):1-8.
30. Compton MT, Frank E, Elon L, et al. Changes in US medical students' specialty interests over the course of medical school. *Journal of General Internal Medicine* 2008;23(7):1095-100. doi: 10.1007/s11606-008-0579-z
31. Indyk D, Deen D, Fornari A, et al. The influence of longitudinal mentoring on medical student selection of primary care residencies. *BMC medical education* 2011;11(1):27.
32. Gill H, McLeod S, Duerksen K, et al. Factors influencing medical students' choice of family medicine Effects of rural versus urban background. *Canadian Family Physician* 2012;58(11):E649-E57.
33. Richardson JD. Workforce and lifestyle issues in general surgery training and practice. *Archives of surgery (Chicago, Ill : 1960)* 2002;137(5):515-20.
34. Newton DA, Grayson MS, Thompson LF. The variable influence of lifestyle and income on medical students' career specialty choices: data from two U.S. medical schools, 1998-2004. *Academic medicine : journal of the Association of American Medical Colleges* 2005;80(9):809-14.
35. Orrico K. Ensuring an adequate neurosurgical workforce for 21st century. *Surgeons AAoN* 2012
36. Wright SM, Wong A, Newill CA. The impact of role models on medical students. *Journal of General Internal Medicine* 1997;12(1):53-56.
37. Glazer GM, Ruiz-Wibbelsmann JA. Decades of perceived mediocrity: prestige and radiology. *Radiology* 2011;260(2):311-16.
38. Schwartzbaum AM, McGrath JH, Rothman RA. The perception of prestige differences among medical subspecialties. *Soc Sci Med* 1973;7(5):365-71.
39. Parsa S, Aghazadeh A, Nejatiasafa AA, et al. Freshmen versus Interns' Specialty Interests. *Archives of Iranian Medicine* 2010;13(6):509-15.
40. Komorita SS. Attitude Content, Intensity, and the Neutral Point on a Likert Scale. *J Soc Psychol* 1963;61:327-34. doi: 10.1080/00224545.1963.9919489
41. Baggaley AR, Hull AL. The effect of nonlinear transformations on a Likert scale. *Eval Health Prof* 1983;6(4):483-91.
42. Norman G. Likert scales, levels of measurement and the "laws" of statistics. *Advances in health sciences education : theory and practice* 2010;15(5):625-32. doi: 10.1007/s10459-010-9222-y
43. Smith F, Lambert TW, Goldacre MJ. Factors influencing junior doctors' choices of future specialty: trends over time and demographics based on results from UK national surveys. *Journal of the Royal Society of Medicine* 2015;108(10):396-405. doi: 10.1177/0141076815599674
44. Cochran A, Melby S, Neumayer LA. An Internet-based survey of factors influencing medical student selection of a general surgery career. *American Journal of Surgery* 2005;189(6):742-46. doi: 10.1016/j.amjsurg.2005.03.019
45. Hauer KE, Durning SJ, Kernan WN, et al. Factors associated with medical students' career choices regarding internal medicine. *Jama-Journal of the American Medical Association* 2008;300(10):1154-64. doi: 10.1001/jama.300.10.1154
46. Johnson AL, Sharma J, Chinchilli VM, et al. Why do medical students choose orthopaedics as a career? *The Journal of bone and joint surgery American volume* 2012;94(11):e78. doi: 10.2106/jbjs.k.00826 [published Online First: 2012/05/29]
47. Kiolbassa K, Miksch A, Hermann K, et al. Becoming a general practitioner - Which factors have most impact on career choice of medical students? *Bmc Family Practice* 2011;12:7. doi: 10.1186/1471-2296-12-25
48. Klingensmith ME, Cogbill TH, Luchette F, et al. Factors Influencing the Decision of Surgery Residency Graduates to Pursue General Surgery Practice Versus Fellowship. *Annals of*

- 1  
2  
3 510 *Surgery* 2015;262(3):449-55. doi: 10.1097/sla.0000000000001435
- 4 511 49. Lee JY, Kerbl DC, McDougall EM, et al. Medical Students Pursuing Surgical Fields Have No  
5 512 Greater Innate Motor Dexterity than Those Pursuing Nonsurgical Fields. *Journal of Surgical*  
6 513 *Education* 2012;69(3):360-63. doi: 10.1016/j.jsurg.2011.11.005
- 7 514 50. Macdonald C, Cawood T. Factors influencing career decisions in internal medicine. *Internal*  
8 515 *Medicine Journal* 2012;42(8):918-23. doi: 10.1111/j.1445-5994.2012.02793.x
- 9 516 51. Paiva RE, Vu NV, Verhulst SJ. The effect of clinical experiences in medical school on specialty  
10 517 choice decisions. *J Med Educ* 1982;57(9):666-74.
- 11 518 52. Ni Chroinin D, Cronin E, Cullen W, et al. Would you be a geriatrician? Student career preferences  
12 519 and attitudes to a career in geriatric medicine. *Age Ageing* 2013;42(5):654-7. doi:  
13 520 10.1093/ageing/aft093 [published Online First: 2013/08/07]
- 14 521 53. Rogers LQ, Fincher RM, Lewis LA. Factors influencing medical students to choose primary care  
15 522 or non-primary care specialties. *Academic medicine : journal of the Association of American*  
16 523 *Medical Colleges* 1990;65(9 Suppl):S47-8.
- 17 524 54. Abendroth J, Schnell U, Lichte T, et al. Motives of former interns in general practice for  
18 525 speciality-choice--results of a cross-sectional study among graduates 2007 to 2012. *GMS*  
19 526 *Zeitschrift fur medizinische Ausbildung* 2014;31(1):Doc11. doi: 10.3205/zma000903  
20 527 [published Online First: 2014/02/28]
- 21 528 55. Alawad A, Khan WS, Abdelrazig YM, et al. Factors considered by undergraduate medical students  
22 529 when selecting specialty of their future careers. *Pan African Medical Journal* 2015;20:6. doi:  
23 530 10.11604/pamj.2015.20.102.4715
- 24 531 56. Azizzadeh A, McCollum CH, Miller CC, 3rd, et al. Factors influencing career choice among  
25 532 medical students interested in surgery. *Curr Surg* 2003;60(2):210-3. doi:  
26 533 10.1016/s0149-7944(02)00679-7 [published Online First: 2004/02/20]
- 27 534 57. Celenza A, Bharath J, Scop J. Improving the attractiveness of an emergency medicine career to  
28 535 medical students: An exploratory study. *Emergency Medicine Australasia* 2012;24(6):625-33.  
29 536 doi: 10.1111/j.1742-6723.2012.01607.x
- 30 537 58. Dolan-Evans E, Rogers GD. Barriers for students pursuing a surgical career and where the Surgical  
31 538 Interest Association can intervene. *Anz Journal of Surgery* 2014;84(6):406-11. doi:  
32 539 10.1111/ans.12521
- 33 540 59. Boyd JS, Clyne B, Reinert SE, et al. Emergency Medicine Career Choice: A Profile of Factors and  
34 541 Influences from the Association of American Medical Colleges (AAMC) Graduation  
35 542 Questionnaires. *Academic Emergency Medicine* 2009;16(6):544-49. doi:  
36 543 10.1111/j.1553-2712.2009.00385.x
- 37 544 60. Egerton EA. Choice of career of doctors who graduated from Queen's University, Belfast in 1977.  
38 545 *Med Educ* 1985;19(2):131-7.
- 39 546 61. Diderichsen S, Johansson EE, Verdonk P, et al. Few gender differences in specialty preferences and  
40 547 motivational factors: a cross-sectional Swedish study on last-year medical students. *Bmc*  
41 548 *Medical Education* 2013;13:8. doi: 10.1186/1472-6920-13-39
- 42 549 62. Ferrari S, Reggianini C, Mattei G, et al. International Study of Student Career Choice in Psychiatry  
43 550 (ISoSCCIP): Results from Modena, Italy. *International Review of Psychiatry*  
44 551 2013;25(4):450-59. doi: 10.3109/09540261.2013.804402
- 45 552 63. Freire MDM, Jordao LMR, Ferreira ND, et al. Motivation Towards Career Choice of Brazilian  
46 553 Freshman Students in a Fifteen-Year Period. *Journal of Dental Education* 2011;75(1):115-21.
- 47 554 64. Buddeberg-Fischer B, Klaghofer R, Abel T, et al. Swiss residents' speciality choices--impact of  
48 555 gender, personality traits, career motivation and life goals. *BMC Health Serv Res* 2006;6:137.  
49 556 doi: 10.1186/1472-6963-6-137
- 50 557 65. Dorsey ER, Jarjoura D, Rutecki GW. The influence of controllable lifestyle and sex on the  
51 558 specialty choices of graduating U.S. medical students, 1996-2003. *Academic medicine :*  
52 559 *journal of the Association of American Medical Colleges* 2005;80(9):791-6. [published  
53 560 Online First: 2005/08/27]
- 54 561 66. Ekenze SO, Ugwumba FO, Obi UM, et al. Undergraduate Surgery Clerkship and the Choice of  
55 562 Surgery as a Career: Perspective from a Developing Country. *World Journal of Surgery*  
56 563 2013;37(9):2094-100. doi: 10.1007/s00268-013-2073-y
- 57 564 67. Barikani A, Afaghi M, Barikani F, et al. Perception of the medical students on their future career in  
58 565 Qazvin University of Medical Sciences. *Global journal of health science* 2012;4(4):176-80.  
59 566 doi: 10.5539/gjhs.v4n4p176 [published Online First: 2012/09/18]
- 60 567 68. Bittaye M, Odukogbe AT, Nyan O, et al. Medical students' choices of specialty in The Gambia: the  
568 568 need for career counseling. *BMC Med Educ* 2012;12:72. doi: 10.1186/1472-6920-12-72

- 1  
2  
3 569 69. Bonura EM, Lee ES, Ramsey K, et al. Factors Influencing Internal Medicine Resident Choice of  
4 570 Infectious Diseases or Other Specialties: A National Cross-sectional Study. *Clinical Infectious*  
5 571 *Diseases* 2016;63(2):155-63. doi: 10.1093/cid/ciw263
- 6 572 70. Al-Fouzan R, Al-Ajlan S, Marwan Y, et al. Factors affecting future specialty choice among medical  
7 573 students in Kuwait. *Medical Education Online* 2012;17:7. doi: 10.3402/meo.v17i0.19587
- 8 574 71. AlKot MM, Gouda MA, KhalafAllah MT, et al. Family Medicine in Egypt From Medical Students'  
9 575 Perspective: A Nationwide Survey. *Teaching and Learning in Medicine* 2015;27(3):264-73.  
10 576 doi: 10.1080/10401334.2015.1044654
- 11 577 72. Borges NJ, Manuel RS, Duffy RD, et al. Influences on specialty choice for students entering  
12 578 person-oriented and technique-oriented specialties. *Medical Teacher* 2009;31(12):1086-88.  
13 579 doi: 10.3109/01421590903183787
- 14 580 73. Budd S, Kelley R, Day R, et al. Student attitudes to psychiatry and their clinical placements.  
15 581 *Medical Teacher* 2011;33(11):E586-E92. doi: 10.3109/0142159x.2011.610836
- 16 582 74. Corrigan MA, Shields CJ, Redmond HP. Factors influencing surgical career choices and  
17 583 advancement in Ireland and Britain. *World Journal of Surgery* 2007;31(10):1921-29. doi:  
18 584 10.1007/s00268-007-9175-3
- 19 585 75. Davis CR, Trevatt AEJ, McGoldrick RB, et al. How to train plastic surgeons of the future. *Journal*  
20 586 *of Plastic Reconstructive and Aesthetic Surgery* 2016;69(8):1134-40. doi:  
21 587 10.1016/j.bjps.2016.05.001
- 22 588 76. Deutsch T, Lippmann S, Frese T, et al. Who wants to become a general practitioner? Student and  
23 589 curriculum factors associated with choosing a GP career - a multivariable analysis with  
24 590 particular consideration of practice-orientated GP courses. *Scandinavian Journal of Primary*  
25 591 *Health Care* 2015;33(1):47-53. doi: 10.3109/02813432.2015.1020661
- 26 592 77. Gardner SP, Roberts-Thomson KF. The effect of a change in selection procedures on students'  
27 593 motivation to study dentistry. *Australian Dental Journal* 2014;59(1):2-8. doi:  
28 594 10.1111/adj.12141
- 29 595 78. Dias MS, Sussman JS, Durham S, et al. Perceived benefits and barriers to a career in pediatric  
30 596 neurosurgery: a survey of neurosurgical residents Clinical article. *Journal of*  
31 597 *Neurosurgery-Pediatrics* 2013;12(5):422-33. doi: 10.3171/2013.5.peds12597
- 32 598 79. Goltz CJ, Bachusz RC, Mancini E, et al. Medical Student Career Survey-Vascular Surgery  
33 599 Awareness Initiative. *Annals of Vascular Surgery* 2013;27(2):225-31. doi:  
34 600 10.1016/j.avsg.2012.02.012
- 35 601 80. Gupta NB, Khadilkar SV, Bangar SS, et al. Neurology as career option among postgraduate  
36 602 medical students. *Annals of Indian Academy of Neurology* 2013;16(4):478-82. doi:  
37 603 10.4103/0972-2327.120427
- 38 604 81. Hanzlick R, Prahlow JA, Denton S, et al. Selecting forensic pathology as a career - A survey of the  
39 605 post with an eye on the future. *American Journal of Forensic Medicine and Pathology*  
40 606 2008;29(2):114-22. doi: 10.1097/PAF.0b013e318174f0a9
- 41 607 82. Harris MC, Marx J, Gallagher PR, et al. General vs subspecialty pediatrics - Factors leading to  
42 608 residents' career decisions over a 12-year period. *Archives of Pediatrics & Adolescent*  
43 609 *Medicine* 2005;159(3):212-16. doi: 10.1001/archpedi.159.3.212
- 44 610 83. Hauer KE, Fagan MJ, Kernan W, et al. Internal medicine clerkship directors' perceptions about  
45 611 student interest in internal medicine careers. *Journal of General Internal Medicine*  
46 612 2008;23(7):1101-04. doi: 10.1007/s11606-008-0640-y
- 47 613 84. Labiris G, Vamvakerou V, Tsolakaki O, et al. Perceptions of Greek medical students regarding  
48 614 medical profession and the specialty selection process during the economic crisis years.  
49 615 *Health Policy* 2014;117(2):203-09. doi: 10.1016/j.healthpol.2014.04.009
- 50 616 85. Lambert TW, Goldacre MJ, Bron AJ. Career choices for ophthalmology made by newly qualified  
51 617 doctors in the United Kingdom, 1974-2005. *Bmc Ophthalmology* 2008;8:9. doi:  
52 618 10.1186/1471-2415-8-3
- 53 619 86. Shah HH, Jhaveri KD, Sparks MA, et al. Career Choice Selection and Satisfaction among US  
54 620 Adult Nephrology Fellows. *Clinical Journal of the American Society of Nephrology*  
55 621 2012;7(9):1513-20. doi: 10.2215/cjn.01620212
- 56 622 87. Lefevre JH, Roupert M, Kerneis S, et al. Career choices of medical students: a national survey of  
57 623 1780 students. *Medical Education* 2010;44(6):603-12. doi:  
58 624 10.1111/j.1365-2923.2010.03707.x
- 59 625 88. Vicente B, Rosel L. Challenges for psychiatric recruitment and training in Chile. *International*  
60 626 *Review of Psychiatry* 2013;25(4):413-18. doi: 10.3109/09540261.2013.822348
- 61 627 89. Wiesenfeld L, Abbey S, Takahashi SG, et al. Choosing Psychiatry as a Career: Motivators and



- 1  
2  
3 628 Deterrents at a Critical Decision-Making Juncture. *Canadian Journal of Psychiatry-Revue*  
4 629 *Canadienne De Psychiatrie* 2014;59(8):450-54.
- 5 630 90. Lam CYY, Cheung CSY, Hui ASY. Factors influencing the career interest of medical graduates in  
6 631 obstetrics and gynaecology in Hong Kong: a cross-sectional questionnaire survey. *Hong Kong*  
7 632 *Medical Journal* 2016;22(2):138-43.
- 8 633 91. Hartung PJ, Taber BJ, Richard GV. The physician values in practice scale: Construction and initial  
9 634 validation. *Journal of Vocational Behavior* 2005;67(2):309-20. doi:  
10.1016/j.jvb.2004.05.008
- 10 636 92. Girasek E, Molnar R, Eke E, et al. The medical career choice motivations - Results from a  
11 637 Hungarian study. *Central European Journal of Medicine* 2011;6(4):502-09. doi:  
12 638 10.2478/s11536-011-0034-0
- 13 639 93. Zuccato JA, Kulkarni AV. The Impact of Early Medical School Surgical Exposure on Interest in  
14 640 Neurosurgery. *Canadian Journal of Neurological Sciences* 2016;43(3):410-16. doi:  
15 641 10.1017/cjn.2015.332
- 16 642 94. Wilbanks L, Spollen J, Messias E. Factors Influencing Medical School Graduates Toward a Career  
17 643 in Psychiatry: Analysis from the 2011-2013 Association of American Medical Colleges  
18 644 Graduation Questionnaire. *Academic Psychiatry* 2016;40(2):255-60. doi:  
19 645 10.1007/s40596-015-0287-z
- 20 646 95. West CP, Drefahl MM, Popkave C, et al. Internal Medicine Resident Self-report of Factors  
21 647 Associated with Career Decisions. *Journal of General Internal Medicine* 2009;24(8):946-49.  
22 648 doi: 10.1007/s11606-009-1039-0
- 23 649 96. Watmough S, Taylor D, Ryland I. Using questionnaires to determine whether medical graduates'  
24 650 career choice is determined by undergraduate or postgraduate experiences. *Medical Teacher*  
25 651 2007;29(8):830-32. doi: 10.1080/01421590701551755
- 26 652 97. Thakur A, Fedorka P, Ko C, et al. Impact of mentor guidance in surgical career selection. *Journal*  
27 653 *of Pediatric Surgery* 2001;36(12):1802-04. doi: 10.1053/jpsu.2001.28842
- 28 654 98. Scott I, Gowans M, Wright B, et al. Determinants of choosing a career in surgery. *Medical Teacher*  
29 655 2011;33(12):1011-17. doi: 10.3109/0142159x.2011.558533
- 30 656 99. Schnuth RL, Vasilenko P, Mavis B, et al. What influences medical students to pursue careers in  
31 657 obstetrics and gynecology? *American Journal of Obstetrics and Gynecology*  
32 658 2003;189(3):639-43. doi: 10.1067/s0002-9378(03)00886-x
- 33 659 100. Richards MJM, Drummond R, Murray J, et al. WHAT PROPORTION OF BASIC SURGICAL  
34 660 TRAINEES CONTINUE IN A SURGICAL CAREER? A SURVEY OF THE FACTORS  
35 661 WHICH ARE IMPORTANT IN INFLUENCING CAREER DECISIONS. *Surgeon-Journal*  
36 662 *of the Royal Colleges of Surgeons of Edinburgh and Ireland* 2009;7(5):270-75.
- 37 663 101. Reed CE, Vaporciyan AA, Erikson C, et al. Factors Dominating Choice of Surgical Specialty.  
38 664 *Journal of the American College of Surgeons* 2010;210(3):319-24. doi:  
39 665 10.1016/j.jamcollsurg.2009.11.016
- 40 666 102. de Souza LCL, Mendonca VRR, Garcia GBC, et al. Medical Specialty Choice and Related  
41 667 Factors of Brazilian Medical Students and Recent Doctors. *Plos One* 2015;10(7):15. doi:  
42 668 10.1371/journal.pone.0133585
- 43 669 103. Pikoulis E, Avgerinos ED, Pedeli X, et al. Medical students' perceptions on factors influencing a  
44 670 surgical career: The fate of general surgery in Greece. *Surgery* 2010;148(3):510-15. doi:  
45 671 10.1016/j.surg.2010.01.013
- 46 672 104. Ozer U, Ceri V, Carpar E, et al. Factors Affecting the Choice of Psychiatry as a Specialty and  
47 673 Satisfaction among Turkish Psychiatry Residents. *Academic Psychiatry* 2016;40(2):299-303.  
48 674 doi: 10.1007/s40596-015-0346-5
- 49 675 105. Noble J, Hechter FJ, Karaikos N, et al. Motivational factors and future life plans of orthodontic  
50 676 residents in the United States. *American Journal of Orthodontics and Dentofacial*  
51 677 *Orthopedics* 2010;137(5):623-30. doi: 10.1016/j.ajodo.2008.03.034
- 52 678 106. Noble J. Factors influencing career choice in ophthalmology. *Canadian Journal of*  
53 679 *Ophthalmology-Journal Canadien D Ophthalmologie* 2006;41(5):596-99.
- 54 680 107. Newton DA, Grayson MS, Thompson LF. The variable influence of lifestyle and income on  
55 681 medical students' career specialty choices: Data from two US medical schools, 1998-2004.  
56 682 *Academic Medicine* 2005;80(9):809-14. doi: 10.1097/00001888-200509000-00005
- 57 683 108. Moore HB, Moore PK, Grant AR, et al. Future of acute care surgery: A perspective from the next  
58 684 generation. *Journal of Trauma and Acute Care Surgery* 2012;72(1):94-99. doi:  
59 685 10.1097/TA.0b013e31823b990a
- 60 686 109. Momen AA, Shakurnia A. Factors Influencing Pediatric Specialty Choice among Pediatric

- 1  
2  
3 687 Residents of Ahvaz Jundishapur University of Medical Sciences. *International Journal of*  
4 688 *Pediatrics-Mashhad* 2015;3(3):701-06.  
5 689 110. Mehmood SI, Kumar A, Al-Binali A, et al. Specialty preferences: Trends and perceptions among  
6 690 Saudi undergraduate medical students. *Medical Teacher* 2012;34:S51-S60. doi:  
7 691 10.3109/0142159x.2012.656753  
8 692 111. Lorient Y, Albiges-Sauvin L, Dionysopoulos D, et al. Why do residents choose the medical  
9 693 oncology specialty? Implications for future recruitment-results of the 2007 French  
10 694 Association of Residents in Oncology (AERIO) Survey. *Annals of Oncology*  
11 695 2010;21(1):161-65. doi: 10.1093/annonc/mdp294  
12 696 112. Lefevre JH, Karila L, Kerneis S, et al. Motivation of French medical students to pursue surgical  
13 697 careers: Results of national survey of 1742 students. *Journal of Visceral Surgery*  
14 698 2010;147(3):E181-E86. doi: 10.1016/j.jviscsurg.2010.08.004  
15 699 113. Vo A, McLean L, McInnes MDF. Medical specialty preferences in early medical school training  
16 700 in Canada. *Int J Med Educ* 2017;8:400-07. doi: 10.5116/ijme.59f4.3c15  
17 701 114. Grasreiner D, Dahmen U, Settmacher U. Specialty preferences and influencing factors: a repeated  
18 702 cross-sectional survey of first- to sixth-year medical students in Jena, Germany. *BMC medical*  
19 703 *education* 2018;18 doi: ARTN 103  
20 704 10.1186/s12909-018-1200-8  
21 705 115. Alkhaneen H, Alhusain F, Alshahri K, et al. Factors influencing medical students' choice of  
22 706 emergency medicine as a career specialty-a descriptive study of Saudi medical students.  
23 707 *International journal of emergency medicine* 2018;11(1):14. doi: 10.1186/s12245-018-0174-y  
24 708 [published Online First: 2018/03/09]  
25 709

1  
2  
3 710 **Legends**

4  
5 711 **Table 1. Selected Characteristics of the 75 Studies Included in this Systematic**  
6  
7 712 **Review and Meta-analysis**

8  
9 713 **Table 2. Meta-analyses of the Factors Influencing Medical Students' Choice of**  
10  
11 714 **Subspecialty**

12  
13 715 **Table 3. Meta-regression of the EOI Value Stratified by Study-level**  
14  
15 716 **Characteristics**

16  
17 717 **Figure 1. Bar Graph of the Meta-analyses of the Factors Influencing Medical**  
18  
19 718 **Students' Choice of Subspecialty Stratified by Region.**

20  
21 719 **Figure 2. Bar Graph of the Meta-analyses of the Factors Influencing Medical**  
22  
23 720 **Students' Choice of Subspecialty Stratified by Survey Year.**

24  
25  
26 721 **Supplements**

27  
28 722 **Methods S1. Search strategy used in the current systematic review and**  
29  
30 723 **meta-analysis.**

31  
32 724 **Table S1. Quality Assessment of the Included Studies.**

33  
34 725 **Table S2. Meta-analyses of the Factors Influencing Medical Students' Choice of**  
35  
36 726 **Subspecialty Stratified by Region and Survey Year.**

37  
38 727 **Figure S1. Flow Diagram of the Study Inclusion Process.**

39  
40 728 **Figure S2. Forest Plot of "Academic Interest".**

41  
42 729 **Figure S3. Forest Plot of "Competencies".**

43  
44 730 **Figure S4. Forest Plot of "Controllable Lifestyle or Flexible Work Schedule".**

45  
46 731 **Figure S5. Forest Plot of "Patient Service Orientation".**

47  
48 732 **Figure S6. Forest Plot of "Medical Teachers or Mentors".**

49  
50 733 **Figure S7. Forest Plot of "Career Opportunities".**

51  
52 734 **Figure S8. Forest Plot of "Workload or Working Hours".**

1  
2  
3 735 **Figure S9. Forest Plot of “Income”.**

4  
5 736 **Figure S10. Forest Plot of “Length of Training”.**

6  
7 737 **Figure S11. Forest Plot of “Prestige”.**

8  
9 738 **Figure S12. Forest Plot of “Advice from Others”.**

10  
11 739 **Figure S13. Forest Plot of “Student Debt”.**

12  
13 740 **Figure S14. Funnel Plots of the Publication Bias Tests of the 12 Factors.**

14  
15  
16 741

17  
18  
19  
20  
21  
22  
23  
24  
25  
26  
27  
28  
29  
30  
31  
32  
33  
34  
35  
36  
37  
38  
39  
40  
41  
42  
43  
44  
45  
46  
47  
48  
49  
50  
51  
52  
53  
54  
55  
56  
57  
58  
59  
60

For peer review only

**Table 1. Selected Characteristics of the 75 Studies Included in this Systematic Review and Meta-analysis**

| First Author, Year                          | Country     | Survey years | Sample size | Average age | Men, No. (%)  | Scores |
|---------------------------------------------|-------------|--------------|-------------|-------------|---------------|--------|
| Smith et al, <sup>43</sup> 2015             | UK          | 2012         | 2,978       | NR          | NR            | 6      |
| Cochran et al, <sup>44</sup> 2005           | USA         | 2002         | 408         | 27.2        | 214 (52.45)   | 5      |
| Hauer et al, <sup>45</sup> 2008             | USA         | 2007         | 1,177       | NR          | NR            | 6      |
| Johnson et al, <sup>46</sup> 2012           | USA         | 2012         | 622         | NR          | NR            | 6      |
| Kiolbassa et al, <sup>47</sup> 2011         | Germany     | 2010         | 1,114       | 24.1        | 408 (36.62)   | 5      |
| Klingensmith et al, <sup>48</sup> 2015      | USA         | 2013         | 792         | NR          | 539 (68.06)   | 6      |
| Lee et al, <sup>49</sup> 2012               | USA         | 2012         | 100         | NR          | 58 (58)       | 7      |
| Macdonald et al, <sup>50</sup> 2012         | New Zealand | 2011         | 134         | NR          | 79 (58.96)    | 7      |
| Parsa et al, <sup>39</sup> 2010             | Iran        | 2006-2007    | 137         | 27.34       | 49 (35.77)    | 7      |
| Paiva et al, <sup>51</sup> 1982             | USA         | 1982         | 144         | NR          | NR            | 6      |
| Ni Chroinin et al, <sup>52</sup> 2013       | UK          | 2009-2011    | 274         | NR          | 112 (40.89)   | 7      |
| Newton et al, <sup>34</sup> 2005            | USA         | 1998-2004    | 1,258       | NR          | 642 (51.03)   | 8      |
| Rogers et al, <sup>53</sup> 1990            | USA         | 1989         | 266         | NR          | 205 (77.07)   | 6      |
| Abendroth J et al, <sup>54</sup> 2014       | Germany     | 2007-2012    | 45          | NR          | 14 (31)       | 7      |
| Alawad et al, <sup>55</sup> 2015            | USA         | 2010-2011    | 45          | NR          | 36 (80)       | 8      |
| Azizzadeh et al, <sup>56</sup> 2003         | USA         | 2002         | 130         | NR          | NR            | 6      |
| Celenza et al, <sup>57</sup> 2012           | Australia   | 2009         | 216         | NR          | 121 (56.02)   | 8      |
| Dolan-Evans et al, <sup>58</sup> 2014       | Australia   | 2013         | 419         | NR          | 215 (51.31)   | 8      |
| Boyd et al, <sup>59</sup> 2009              | USA         | 2005-2006    | 5,848       | NR          | 2,982 (50.99) | 8      |
| Egerton et al, <sup>60</sup> 1985           | Ireland     | 1977-1981    | 134         | 30          | 82 (61.19)    | 6      |
| Diderichsen et al, <sup>61</sup> 2013       | Sweden      | 2006-2009    | 372         | 27          | 157 (42.20)   | 6      |
| Ferrari et al, <sup>62</sup> 2013           | Italy, UK   | 2009-2011    | 45          | 25          | NR            | 9      |
| Freire et al, <sup>63</sup> 2011            | Brazil      | 2006-2008    | 290         | 23          | 102 (35.17)   | 7      |
| Buddeberg-Fischer et al, <sup>64</sup> 2006 | Switzerland | 2001-2003    | 522         | 31.1        | 241 (46.17)   | 9      |
| Dorsey et al, <sup>65</sup> 2005            | USA         | 2003         | 11,029      | NR          | 4,964 (45.01) | 6      |
| Ekenze et al, <sup>66</sup> 2013            | Nigeria     | 2009-2010    | 96          | 25.9        | NR            | 7      |
| Barikani et al, <sup>67</sup> 2012          | Australia   | 2008-2009    | 49          | 21.7        | NR            | 6      |
| Bittaye et al, <sup>68</sup> 2012           | Gambia      | 2011         | 106         | 24.1        | 48 (45.28)    | 6      |
| Bonura et al, <sup>69</sup> 2016            | USA         | 2015         | 590         | NR          | 321 (54.40)   | 9      |
| Al-Fouzan et al, <sup>70</sup> 2012         | Kuwait      | 2011-2012    | 144         | NR          | NR            | 7      |
| AlKot et al, <sup>71</sup> 2015             | Egypt       | 2013         | 451         | 21.8        | NR            | 7      |
| Borges et al, <sup>72</sup> 2009            | USA         | 2001-2005    | 341         | NR          | NR            | 5      |
| Budd et al, <sup>73</sup> 2011              | UK          | 2011         | 870         | 22          | NR            | 7      |
| Corrigan et al, <sup>74</sup> 2007          | Ireland     | 2007         | 222         | NR          | 142 (63.96)   | 7      |
| Davis et al, <sup>75</sup> 2016             | UK          | 2016         | 173         | NR          | 76 (43.93)    | 7      |
| Deutsch et al, <sup>76</sup> 2015           | Germany     | 2011         | 659         | 27.9        | NR            | 8      |
| Gardner et al, <sup>77</sup> 2014           | Australia   | 1993-2005    | 631         | NR          | NR            | 7      |
| Dias et al, <sup>78</sup> 2013              | UK          | 2013         | 495         | NR          | 438 (88.48)   | 5      |
| Goltz et al, <sup>79</sup> 2013             | USA         | 2012         | 102         | 24.5        | 34 (33.33)    | 6      |
| Gupta et al, <sup>80</sup> 2013             | India       | 2013         | 243         | NR          | 179 (73.36)   | 6      |

|    |  |                                       |              |           |        |       |                |   |
|----|--|---------------------------------------|--------------|-----------|--------|-------|----------------|---|
| 1  |  |                                       |              |           |        |       |                |   |
| 2  |  |                                       |              |           |        |       |                |   |
| 3  |  | Hanzlick et al, <sup>81</sup> 2008    | USA          | 2006      | 161    | NR    | NR             | 6 |
| 4  |  | Harris et al, <sup>82</sup> 2005      | USA          | 1991-2002 | 104    | NR    | 53 (50.96)     | 6 |
| 5  |  | Hauer et al, <sup>83</sup> 2008       | USA          | 2008      | 80     | NR    | NR             | 6 |
| 6  |  | Labiris et al, <sup>84</sup> 2014     | Greece       | 2014      | 111    | 23.6  | 55 (49.54)     | 6 |
| 7  |  | Lambert et al, <sup>85</sup> 2008     | UK           | 2007      | 17,393 | NR    | NR             | 6 |
| 8  |  | Shah et al, <sup>86</sup> 2012        | USA          | 2011      | 892    | NR    | NR             | 6 |
| 9  |  | Lefevre et al, <sup>87</sup> 2010     | USA          | 2008      | 1,555  | NR    | 589 (37.88)    | 6 |
| 10 |  | Vicente et al, <sup>88</sup> 2013     | Chile        | 2013      | 30     | NR    | NR             | 6 |
| 11 |  | Wiesenfeld et al, <sup>89</sup> 2014  | Canada       | 2013      | 60     | NR    | NR             | 7 |
| 12 |  | Lam et al, <sup>90</sup> 2016         | Hong Kong    | 2015      | 228    | 23    | NR             | 9 |
| 13 |  | Hartung et al, <sup>91</sup> 2005     | USA          | 2004      | 192    | 20.59 | 74 (38.54)     | 4 |
| 14 |  | Girasek et al, <sup>92</sup> 2011     | Hungary      | 2011      | 536    | NR    | NR             | 5 |
| 15 |  | Zuccato et al, <sup>93</sup> 2015     | Canada       | 2012      | 37     | NR    | 24 (65)        | 6 |
| 16 |  | Wilbanks et al, <sup>94</sup> 2015    | USA          | 2011-2013 | 29,227 | NR    | 15,164 (51.99) | 9 |
| 17 |  | West et al, <sup>95</sup> 2009        | USA          | 2005-2007 | 14,890 | NR    | 8,700 (58.43)  | 6 |
| 18 |  | Watmough et al, <sup>96</sup> 2007    | UK           | 2005      | 116    | NR    | 66 (56.90)     | 4 |
| 19 |  | Thakur et al, <sup>97</sup> 2001      | USA          | 2001      | 56     | NR    | 53 (95)        | 8 |
| 20 |  | Scott et al, <sup>98</sup> 2011       | Canada       | 2002-2004 | 1,542  | NR    | NR             | 6 |
| 21 |  | Schnuth et al, <sup>99</sup> 2003     | USA          | 2002      | 203    | NR    | 72 (53.47)     | 6 |
| 22 |  | Richards et al, <sup>100</sup> 2009   | UK           | 2009      | 150    | NR    | 108 (72.00)    | 5 |
| 23 |  | Reed et al, <sup>101</sup> 2009       | USA          | 2008      | 2,022  | NR    | 1,354 (66.96)  | 9 |
| 24 |  | de Souza et al, <sup>102</sup> 2015   | Portugal     | 2012      | 1,303  | NR    | NR             | 7 |
| 25 |  | Pikoulis et al, <sup>103</sup> 2010   | Greece       | 2006-2007 | 87     | NR    | NR             | 6 |
| 26 |  | Ozer et al, <sup>104</sup> 2015       | Turkey       | 2013      | 98     | 27.7  | 26 (26.53)     | 6 |
| 27 |  | Noble et al, <sup>105</sup> 2004      | Canada       | 2004      | 21,296 | NR    | NR             | 8 |
| 28 |  | Noble et al, <sup>106</sup> 2010      | Canada       | 2007      | 120    | NR    | NR             | 5 |
| 29 |  | Newton et al, <sup>107</sup> 2005     | USA          | 2004      | 1,286  | NR    | NR             | 6 |
| 30 |  | Moore et al, <sup>108</sup> 2012      | USA          | 2011      | 337    | 26    | 179 (53.12)    | 6 |
| 31 |  | Momen et al, <sup>109</sup> 2015      | Iran         | 2014-2015 | 38     | 35.6  | 11 (29)        | 6 |
| 32 |  | Mehmood et al, <sup>110</sup> 2012    | Saudi Arabia | 2012      | 550    | NR    | 348 (63.27)    | 6 |
| 33 |  | Loriot et al, <sup>111</sup> 2010     | France       | 2007      | 44     | NR    | 17 (39)        | 7 |
| 34 |  | Lefevre et al, <sup>112</sup> 2010    | France       | 2008      | 522    | 23.8  | 198 (37.93)    | 7 |
| 35 |  | Vo et al, <sup>113</sup> 2017         | Canada       | 2017      | 90     | 22.5  | 52 (57.78)     | 5 |
| 36 |  | Grasreiner et al, <sup>114</sup> 2018 | Germany      | 2014-2016 | 181    | 24    | 33 (18.10)     | 6 |
| 37 |  | Alkhaman et al, <sup>115</sup> 2018   | Saudi Arabia | 2017      | 436    | NA    | 250 (57.00)    | 5 |

742 Footnotes: scores: quality score of the AHRQ scale.

743

**Table 2. Meta-analyses of the Factors Influencing Medical Students' Choice of Subspecialty**

| Factor                                           | No. of studies | Total no. of participants | EOI value (%) | 95% CI of EOI |       | Cochran's <i>Q</i> | <i>I</i> -square (%) | <i>Tau</i> -square | <i>P</i> -Value |
|--------------------------------------------------|----------------|---------------------------|---------------|---------------|-------|--------------------|----------------------|--------------------|-----------------|
|                                                  |                |                           |               | value         | value |                    |                      |                    |                 |
|                                                  |                |                           |               | Lower         | Upper |                    |                      |                    |                 |
| Academic interests                               | 38             | 82,366                    | 75.29         | 66.93         | 82.11 | 14719.76           | 99.70                | 1.60               | <0.0001         |
| Competencies                                     | 17             | 76,515                    | 55.15         | 33.63         | 74.90 | 23572.74           | 99.90                | 3.44               | <0.0001         |
| Controllable lifestyle or flexible work schedule | 44             | 101,001                   | 53.00         | 47.90         | 58.03 | 8624.46            | 99.50                | 0.45               | <0.0001         |
| Patient service orientation                      | 37             | 46,572                    | 50.04         | 44.65         | 55.43 | 2668.79            | 98.70                | 0.41               | <0.0001         |
| Medical teachers or Career opportunities         | 32             | 85,071                    | 46.93         | 37.77         | 56.30 | 15216.32           | 99.80                | 1.14               | <0.0001         |
|                                                  | 38             | 81,923                    | 44.00         | 32.26         | 48.78 | 13553.20           | 99.70                | 1.15               | <0.0001         |
| Workload or working hours                        | 20             | 22,051                    | 37.99         | 29.59         | 47.19 | 584.81             | 98.30                | 0.69               | <0.0001         |
| Income                                           | 50             | 109,791                   | 34.70         | 28.36         | 41.62 | 16952.48           | 99.70                | 1.09               | <0.0001         |
| Length of training                               | 18             | 42,046                    | 32.30         | 27.61         | 37.37 | 917.21             | 98.10                | 0.20               | <0.0001         |
| Prestige                                         | 26             | 30,629                    | 31.17         | 26.32         | 37.69 | 1464.67            | 98.30                | 0.52               | <0.0001         |
| Advice from others                               | 18             | 82,692                    | 28.24         | 22.26         | 34.23 | 7679.73            | 99.80                | 0.02               | <0.0001         |
| Student debt                                     | 8              | 38,917                    | 15.33         | 10.96         | 21.03 | 574.81             | 98.80                | 0.27               | <0.0001         |

744

**Table 3. Meta-regression of the EOI Value Stratified by Study-level Characteristics**

| Factor                                           | estimate     | 95 CI% of estimate |         | P-Value |        |
|--------------------------------------------------|--------------|--------------------|---------|---------|--------|
|                                                  |              | Lower              | Upper   |         |        |
| Academic interests                               | Country      | -0.2314            | -1.1575 | 0.6946  | 0.6302 |
|                                                  | Survey years | 0.3811             | -0.3580 | 1.1202  | 0.2711 |
|                                                  | Specialty    | -0.4892            | -1.5345 | 0.5562  | 0.4008 |
|                                                  | Sample size  | 0.2362             | -0.5488 | 1.0212  | 0.6537 |
| Competencies                                     | Country      | 0.6946             | -1.1461 | 0.8938  | 0.8376 |
|                                                  | Survey years | -1.0418            | -2.0950 | 0.0114  | 0.0151 |
|                                                  | Specialty    | 0.0904             | -1.5786 | 1.7594  | 0.9398 |
|                                                  | Sample size  | -0.5720            | -1.8606 | 0.7166  | 0.5823 |
| Controllable lifestyle or flexible work schedule | Country      | -0.1261            | -1.1461 | 0.8938  | 0.9614 |
|                                                  | Survey years | -0.0001            | -0.4052 | 0.4051  | 0.9822 |
|                                                  | Specialty    | -0.8989            | -1.4979 | -0.3000 | 0.0035 |
|                                                  | Sample size  | -0.0518            | -0.4396 | 0.3361  | 0.7203 |
| Patient service orientation                      | Country      | -0.6238            | -1.3118 | 0.0642  | 0.0833 |
|                                                  | Survey years | -0.0414            | -0.6912 | 0.6083  | 0.8524 |
|                                                  | Specialty    | -1.5982            | -2.5227 | -0.6737 | 0.0010 |
|                                                  | Sample size  | -0.1157            | -0.7473 | 0.5159  | 0.6358 |
| Medical teachers or mentors                      | Country      | 0.7395             | 0.3117  | 1.1674  | 0.0007 |
|                                                  | Survey years | 0.1133             | -0.3580 | 0.5845  | 0.6376 |
|                                                  | Specialty    | 0.0605             | -0.4441 | 0.5652  | 0.8141 |
|                                                  | Sample size  | -0.1202            | -0.5567 | 0.3163  | 0.5894 |
| Career opportunities                             | Country      | 0.1075             | -0.7030 | 0.9179  | 0.5828 |
|                                                  | Survey years | 0.3284             | -0.3913 | 1.0480  | 0.7546 |
|                                                  | Specialty    | -0.9292            | -1.8015 | -0.0570 | 0.0077 |
|                                                  | Sample size  | 0.3654             | 0.1156  | 1.5478  | 0.0081 |
| Workload or working hours                        | Country      | -0.4535            | -1.5086 | 0.6016  | 0.3981 |
|                                                  | Survey years | 0.4624             | -0.5417 | 1.4665  | 0.3922 |
|                                                  | Specialty    | -0.9878            | -2.1727 | 0.1972  | 0.1070 |
|                                                  | Sample size  | 0.0982             | -0.8589 | 1.0553  | 0.8205 |
| Income                                           | Country      | 0.1058             | -0.4665 | 0.6781  | 0.7390 |
|                                                  | Survey years | 0.0999             | -0.4379 | 0.6377  | 0.8774 |
|                                                  | Specialty    | -0.6457            | -1.3267 | 0.0352  | 0.0480 |
|                                                  | Sample size  | 0.0523             | -0.4826 | 0.5872  | 0.6786 |
| Length of training                               | Country      | -0.1559            | -1.2782 | 0.9664  | 0.7854 |
|                                                  | Survey years | -0.2158            | -1.4089 | 0.9772  | 0.7229 |
|                                                  | Specialty    | 0.3959             | -0.9585 | 1.7502  | 0.5667 |
|                                                  | Sample size  | 0.1565             | -0.6631 | 0.9761  | 0.7082 |
| Prestige                                         | Country      | -0.3346            | -1.0799 | 0.4106  | 0.3485 |
|                                                  | Survey years | -0.4513            | -1.1378 | 0.2352  | 0.0950 |
|                                                  | Specialty    | -1.0112            | -1.8980 | -0.1244 | 0.0172 |
|                                                  | Sample size  | 0.0355             | -0.6013 | 0.6723  | 0.5214 |
| Advice from others                               | Country      | -0.0097            | -0.0722 | 0.0529  | 0.9328 |
|                                                  | Survey years | -0.0861            | -0.1471 | -0.0251 | 0.0057 |



1  
2  
3  
4  
5  
6  
7  
8  
9  
10  
11  
12  
13  
14  
15  
16  
17  
18  
19  
20  
21  
22  
23  
24  
25  
26  
27  
28  
29  
30  
31  
32  
33  
34  
35  
36  
37  
38  
39  
40  
41  
42  
43  
44  
45  
46  
47  
48  
49  
50  
51  
52  
53  
54  
55  
56  
57  
58  
59  
60

|              |              |         |         |         |         |
|--------------|--------------|---------|---------|---------|---------|
|              | Specialty    | -0.2017 | -0.2790 | -0.1244 | <0.0001 |
|              | Sample size  | 0.2125  | 0.1309  | 0.2941  | <0.0001 |
|              | Country      | 2.7853  | 2.0544  | 3.5162  | 0.0001  |
| Student debt | Survey years | -0.1567 | -0.6707 | 0.3573  | 0.5502  |
|              | Sample size  | -0.5248 | -1.0108 | -0.0388 | 0.0343  |

745

For peer review only

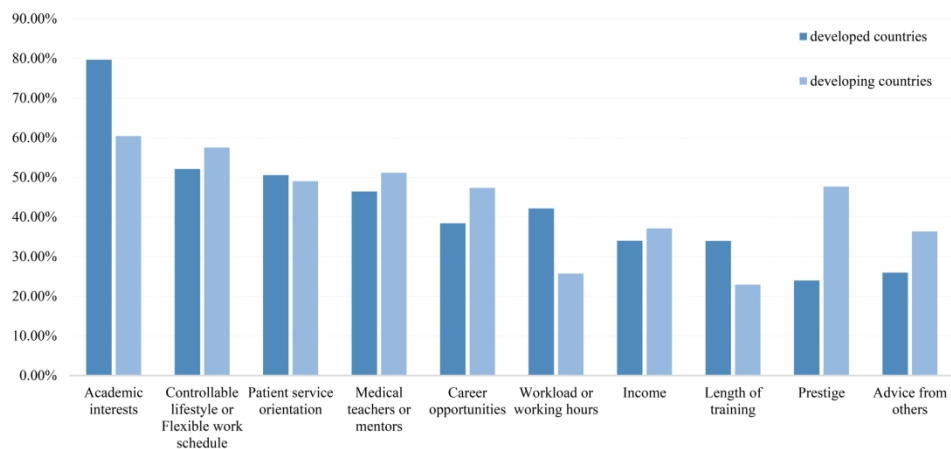

Figure 1. Bar Graph of the Meta-analyses of the Factors Influencing Medical Students' Choice of Subspecialty Stratified by Region.

190x107mm (300 x 300 DPI)

1  
2  
3  
4  
5  
6  
7  
8  
9  
10  
11  
12  
13  
14  
15  
16  
17  
18  
19  
20  
21  
22  
23  
24  
25  
26  
27  
28  
29  
30  
31  
32  
33  
34  
35  
36  
37  
38  
39  
40  
41  
42  
43  
44  
45  
46  
47  
48  
49  
50  
51  
52  
53  
54  
55  
56  
57  
58  
59  
60



Figure 2. Bar Graph of the Meta-analyses of the Factors Influencing Medical Students' Choice of Subspecialty Stratified by Survey Year.

190x107mm (300 x 300 DPI)

1  
2  
3  
4 **SI Methods. Search strategy used in the current systematic review and meta-**  
5  
6 **analysis.**  
7  
8  
9

10  
11 ***Medical Students***

- 12  
13  
14 1. Students, Medical [Mesh]  
15  
16 2. Medical students  
17  
18 3. Medical student  
19  
20 4. Student, Medical  
21  
22 5. OR / 1 – 4  
23  
24  
25  
26

13. Cross sectional study  
14. Cross sectional study [Publication  
Type]  
15. Cross sectional study [Mesh Terms]  
16. Systematic review  
17. Systematic review [Publication Type]  
18. Systematic review [Mesh Terms]

27  
28  
29  
30 ***Subspecialty Choice***

- 31  
32 6. Career choices  
33  
34 7. Choice, Career  
35  
36 8. Choices career  
37  
38 9. Specialties  
39  
40  
41  
42 10. Sub-specialties  
43  
44 11. Sub-discipline  
45  
46  
47 12. OR / 6 – 11  
48  
49  
50

19. Meta-analysis [Title/Abstract]  
20. Meta-analysis [Mesh Terms]  
21. Meta-analysis [Publication Type]  
22. OR / 12 – 21

51  
52  
53 ***Factors***

23. Factors

54  
55  
56  
57 ***Combined search***

23. #5 AND #12AND #22 AND #2

58  
59 ***Study design***

60 **Abbreviations:** MeSH, Medical Subject Heading in PubMed

**Table S1. Quality assessment of the included studies**

| Quality assessment criteria                    | 1 | 2 | 3 | 4 | 5 | 6 | 7 | 8 | 9 | 10 | 11 | Scores |
|------------------------------------------------|---|---|---|---|---|---|---|---|---|----|----|--------|
| 1 Smith et al, <sup>41</sup> 2015              | Y | U | Y | Y | N | Y | N | Y | N | Y  | N  | 6      |
| 2 Cochran et al, <sup>42</sup> 2005            | Y | U | Y | Y | N | Y | N | Y | N | N  | N  | 5      |
| 3 Hauer et al, <sup>43</sup> 2008              | Y | U | Y | Y | N | Y | N | Y | N | Y  | N  | 6      |
| 4 Johnson et al, <sup>44</sup> 2012            | Y | U | Y | Y | N | Y | N | Y | N | Y  | N  | 6      |
| 5 Kiobassa et al, <sup>45</sup> 2011           | Y | U | Y | Y | N | Y | N | Y | N | N  | N  | 5      |
| 6 Klingensmith et al, <sup>46</sup> 2015       | Y | U | Y | Y | N | Y | N | Y | N | Y  | N  | 6      |
| 7 Lee et al, <sup>47</sup> 2012                | Y | U | Y | Y | Y | Y | N | Y | N | Y  | N  | 7      |
| 8 Macdonald et al, <sup>48</sup> 2012          | Y | U | Y | Y | Y | Y | N | Y | N | Y  | N  | 7      |
| 9 Parsa et al, <sup>37</sup> 2010              | Y | U | Y | Y | Y | Y | N | Y | N | Y  | N  | 7      |
| 10 Paiva et al, <sup>49</sup> 1982             | Y | U | Y | Y | N | Y | N | Y | N | Y  | N  | 6      |
| 11 Ni Chroinin et al, <sup>50</sup> 2013       | Y | U | Y | Y | Y | Y | N | Y | N | Y  | N  | 7      |
| 12 Newton et al, <sup>32</sup> 2005            | Y | U | Y | Y | Y | Y | Y | Y | N | Y  | N  | 8      |
| 13 Rogers et al, <sup>51</sup> 1990            | Y | U | Y | Y | N | Y | N | Y | N | Y  | N  | 6      |
| 14 Abendroth J et al, <sup>52</sup> 2014       | Y | U | Y | Y | N | Y | N | Y | N | Y  | Y  | 7      |
| 15 Alawad et al, <sup>53</sup> 2015            | Y | U | Y | Y | N | Y | Y | Y | Y | Y  | N  | 8      |
| 16 Azizzadeh et al, <sup>54</sup> 2003         | Y | U | Y | Y | Y | Y | N | N | N | Y  | N  | 6      |
| 17 Celenza et al, <sup>55</sup> 2012           | Y | U | Y | Y | Y | Y | Y | N | Y | Y  | N  | 8      |
| 18 Dolan-Evans et al, <sup>56</sup> 2014       | Y | U | Y | Y | Y | Y | N | Y | N | Y  | Y  | 8      |
| 19 Boyd et al, <sup>57</sup> 2009              | Y | U | Y | Y | Y | Y | Y | Y | N | Y  | N  | 8      |
| 20 Egerton et al, <sup>58</sup> 1985           | Y | U | Y | Y | N | Y | N | Y | N | Y  | N  | 6      |
| 21 Diderichsen et al, <sup>59</sup> 2013       | Y | U | Y | Y | N | Y | N | Y | N | Y  | N  | 6      |
| 22 Ferrari et al, <sup>60</sup> 2013           | Y | U | Y | Y | Y | Y | Y | Y | Y | Y  | N  | 9      |
| 23 Freire et al, <sup>61</sup> 2011            | Y | U | Y | Y | Y | Y | N | Y | N | Y  | N  | 7      |
| 24 Buddeberg-Fischer et al, <sup>62</sup> 2006 | Y | U | Y | Y | N | Y | Y | Y | Y | Y  | Y  | 9      |
| 25 Dorsey et al, <sup>63</sup> 2005            | Y | U | Y | Y | N | Y | N | Y | N | Y  | N  | 6      |
| 26 Ekenze et al, <sup>64</sup> 2013            | Y | U | Y | Y | Y | Y | Y | N | N | Y  | N  | 7      |
| 27 Barikani et al, <sup>65</sup> 2012          | Y | U | Y | Y | N | Y | N | Y | N | Y  | N  | 6      |
| 28 Bittaye et al, <sup>66</sup> 2012           | Y | U | Y | Y | N | Y | N | Y | N | Y  | N  | 6      |
| 39 Bonura et al, <sup>67</sup> 2016            | Y | U | Y | Y | Y | Y | Y | Y | Y | Y  | N  | 9      |
| 30 Al-Fouzan et al, <sup>68</sup> 2012         | Y | U | Y | Y | Y | Y | N | Y | N | Y  | N  | 7      |
| 31 AlKot et al, <sup>69</sup> 2015             | Y | U | Y | Y | Y | Y | N | Y | N | Y  | N  | 7      |
| 32 Borges et al, <sup>70</sup> 2009            | Y | U | Y | Y | N | Y | N | N | N | Y  | N  | 5      |
| 33 Budd et al, <sup>71</sup> 2011              | Y | U | Y | Y | Y | Y | N | Y | N | Y  | N  | 7      |
| 34 Corrigan et al, <sup>72</sup> 2007          | Y | U | Y | Y | Y | Y | N | Y | N | Y  | N  | 7      |
| 35 Davis et al, <sup>73</sup> 2016             | Y | U | Y | Y | Y | Y | N | Y | N | Y  | N  | 7      |
| 36 Deutsch et al, <sup>74</sup> 2015           | Y | U | Y | Y | Y | Y | N | Y | Y | Y  | N  | 8      |
| 37 Gardner et al, <sup>75</sup> 2014           | Y | U | Y | Y | N | Y | N | Y | N | Y  | N  | 7      |
| 38 Dias et al, <sup>76</sup> 2013              | Y | U | Y | Y | N | Y | N | N | N | Y  | N  | 5      |
| 39 Goltz et al, <sup>77</sup> 2013             | Y | U | Y | Y | N | Y | N | Y | N | Y  | N  | 6      |
| 40 Gupta et al, <sup>78</sup> 2013             | Y | U | Y | Y | N | Y | N | Y | N | Y  | N  | 6      |
| 41 Hanzlick et al, <sup>79</sup> 2008          | Y | U | Y | Y | N | Y | N | Y | N | Y  | N  | 6      |
| 42 Harris et al, <sup>80</sup> 2005            | Y | U | Y | Y | N | Y | N | Y | N | Y  | N  | 6      |
| 43 Hauer et al, <sup>81</sup> 2008             | Y | U | Y | Y | N | Y | N | Y | N | Y  | N  | 6      |
| 44 Labiris et al, <sup>82</sup> 2014           | Y | U | Y | Y | N | Y | N | Y | N | Y  | N  | 6      |
| 45 Lambert et al, <sup>83</sup> 2008           | Y | U | Y | Y | N | Y | N | Y | N | Y  | N  | 6      |
| 46 Shah et al, <sup>84</sup> 2012              | Y | U | Y | Y | N | Y | N | Y | N | Y  | N  | 6      |
| 47 Lefevre et al, <sup>85</sup> 2010           | Y | U | Y | Y | N | Y | N | Y | N | Y  | N  | 6      |
| 48 Vicente et al, <sup>86</sup> 2013           | Y | U | Y | Y | N | N | Y | N | Y | Y  | N  | 6      |
| 49 Wiesenfeld et al, <sup>87</sup> 2014        | Y | U | Y | Y | Y | Y | N | Y | N | Y  | N  | 7      |
| 50 Lam et al, <sup>88</sup> 2016               | Y | U | Y | Y | Y | Y | Y | Y | Y | Y  | N  | 9      |
| 51 Hartung et al, <sup>89</sup> 2005           | Y | U | Y | Y | N | Y | N | N | N | N  | N  | 4      |
| 52 Girasek et al, <sup>90</sup> 2011           | Y | U | Y | Y | N | Y | N | N | N | Y  | N  | 5      |
| 53 Zuccato et al, <sup>91</sup> 2015           | Y | U | Y | Y | N | Y | N | Y | N | Y  | N  | 6      |
| 54 Wilbanks et al, <sup>92</sup> 2015          | Y | U | Y | Y | N | Y | Y | Y | Y | Y  | Y  | 9      |
| 55 West et al, <sup>93</sup> 2009              | Y | U | Y | Y | N | Y | N | Y | N | Y  | N  | 6      |
| 56 Watmough et al, <sup>94</sup> 2007          | Y | U | Y | Y | N | N | N | N | N | Y  | N  | 4      |
| 57 Thakur et al, <sup>95</sup> 2001            | Y | U | Y | Y | Y | Y | Y | N | Y | Y  | N  | 8      |
| 58 Scott et al, <sup>96</sup> 2011             | Y | U | Y | Y | N | Y | N | Y | N | Y  | N  | 6      |
| 59 Schnuth et al, <sup>97</sup> 2003           | Y | U | Y | Y | N | Y | N | Y | N | Y  | N  | 6      |
| 60 Richards et al, <sup>98</sup> 2009          | Y | U | Y | Y | N | Y | N | N | N | Y  | N  | 5      |
| 61 Reed et al, <sup>99</sup> 2009              | Y | U | Y | Y | Y | Y | Y | Y | Y | Y  | N  | 9      |
| 62 de Souza et al, <sup>100</sup> 2015         | Y | U | Y | Y | Y | Y | N | Y | N | Y  | N  | 7      |
| 63 Pikoulis et al, <sup>101</sup> 2010         | Y | U | Y | Y | N | Y | N | Y | N | Y  | N  | 6      |
| 64 Ozer et al, <sup>102</sup> 2015             | Y | U | Y | Y | N | N | Y | N | Y | Y  | N  | 6      |
| 65 Noble et al, <sup>103</sup> 2004            | Y | U | Y | Y | Y | Y | Y | Y | N | Y  | N  | 8      |
| 66 Noble et al, <sup>104</sup> 2010            | Y | U | Y | Y | N | Y | N | N | N | Y  | N  | 5      |
| 67 Newton et al, <sup>105</sup> 2005           | Y | U | Y | Y | N | Y | Y | N | N | Y  | N  | 6      |
| 68 Moore et al, <sup>106</sup> 2012            | Y | U | Y | Y | Y | Y | N | Y | N | N  | N  | 6      |
| 69 Momen et al, <sup>107</sup> 2015            | Y | U | Y | Y | N | Y | N | Y | N | Y  | N  | 6      |
| 70 Mehmood et al, <sup>108</sup> 2012          | Y | U | Y | Y | N | Y | N | Y | N | Y  | N  | 6      |
| 71 Loriot et al, <sup>109</sup> 2010           | Y | U | Y | Y | Y | Y | N | Y | N | Y  | N  | 7      |
| 72 Lefevre et al, <sup>110</sup> 2010          | Y | U | Y | Y | Y | Y | N | Y | N | Y  | N  | 7      |
| 73 Vo et al, <sup>111</sup> 2017               | Y | U | Y | Y | Y | N | N | N | N | Y  | N  | 5      |
| 74 Grasreiner et al, <sup>112</sup> 2018       | Y | U | Y | Y | Y | Y | N | N | N | Y  | N  | 6      |
| 75 Alkhaman et al, <sup>113</sup> 2018         | Y | U | Y | Y | N | N | Y | N | N | Y  | N  | 5      |

**Quality assessment criteria in detail**

1. Define the source of information (survey, record review).
2. List the inclusion and exclusion criteria for the exposed and unexposed subjects (cases and controls) or refer to previous publications.
3. Indicate the time period used for identifying patients.
4. Indicate whether the subjects were consecutive if not population-based.
5. Indicate whether the evaluators of the subjective components of the study were masked to the other aspects of participants' status.
6. Describe any assessments undertaken for quality assurance purposes (e.g., test/retest of primary outcome measurements)
7. Explain any patient exclusion from the analyses.
8. Describe how confounding was assessed and/or controlled.
9. If applicable, explain how missing data were handled in the analysis.
10. Summarize the patient response rates and the completeness of the data collection.
11. Clarify what follow-up, if any, was expected and the percentage of patients with incomplete data or follow-up.

“Y”: Yes; “N”: No; “U”: Unclear.

**Table S2. Meta-analyses of the Factors Influencing Medical Students' Choice of Subspecialty Stratified by Region and Survey Year.**

| Factor                                           |             | No. of studies | Total no. of participants | Extent of influence (%) | 95 CI% of EOI value |       | <i>I-square</i> (%) | <i>P</i> -Value | <i>Q</i> -Value |      |      |
|--------------------------------------------------|-------------|----------------|---------------------------|-------------------------|---------------------|-------|---------------------|-----------------|-----------------|------|------|
|                                                  |             |                |                           |                         | Lower               | Upper |                     |                 |                 |      |      |
| Academic interest                                | developed   | 28             | 80,000                    | 79.66                   | 70.73               | 86.39 | 99.8                | 0.02            | 3.51            |      |      |
|                                                  | developing  | 10             | 2,366                     | 60.41                   | 43.44               | 75.19 | 98.0                |                 |                 |      |      |
|                                                  | before 2010 | 29             | 44,174                    | 78.88                   | 69.04               | 86.22 | 99.7                | 0.40            | 1.21            |      |      |
|                                                  | after 2010  | 9              | 38,192                    | 71.54                   | 57.66               | 82.27 | 99.6                |                 |                 |      |      |
| Competencies                                     | before 2010 | 9              | 43,134                    | 44.40                   | 29.11               | 60.83 | 99.8                | 0.21            | 1.86            |      |      |
|                                                  | after 2010  | 8              | 33,381                    | 66.60                   | 34.48               | 88.31 | 99.8                |                 |                 |      |      |
| Controllable lifestyle or flexible work schedule | developed   | 37             | 100,980                   | 52.11                   | 46.52               | 57.65 | 99.6                | 0.63            | 0.68            |      |      |
|                                                  | developing  | 7              | 2,017                     | 57.50                   | 45.81               | 68.41 | 95.9                |                 |                 |      |      |
|                                                  | before 2010 | 22             | 62,945                    | 53.72                   | 47.48               | 59.84 | 99.4                |                 |                 | 0.97 | 0.05 |
| after 2010                                       | 22          | 40,056         | 52.29                     | 43.51                   | 60.93               | 99.2  |                     |                 |                 |      |      |
| Patient service orientation                      | developed   | 27             | 44,235                    | 50.56                   | 44.68               | 56.42 | 98.8                | 0.74            | 0.48            |      |      |
|                                                  | developing  | 10             | 2,337                     | 49.02                   | 31.62               | 66.67 | 98.1                |                 |                 |      |      |
|                                                  | before 2010 | 18             | 40,997                    | 49.56                   | 43.29               | 55.84 | 98.8                |                 |                 | 0.70 | 0.54 |
|                                                  | after 2010  | 19             | 5,579                     | 43.87                   | 38.62               | 63.80 | 98.3                |                 |                 |      |      |
| Medical teachers or mentors                      | developed   | 28             | 84,076                    | 46.43                   | 36.63               | 56.52 | 99.8                | 0.73            | 0.48            |      |      |
|                                                  | developing  | 4              | 995                       | 51.14                   | 33.97               | 68.04 | 95.4                |                 |                 |      |      |
|                                                  | before 2010 | 21             | 49,654                    | 48.48                   | 36.93               | 60.19 | 99.8                |                 |                 | 0.70 | 0.54 |
|                                                  | after 2010  | 11             | 35,417                    | 43.87                   | 27.94               | 61.18 | 99.7                |                 |                 |      |      |
| Career opportunities                             | developed   | 31             | 79,867                    | 38.41                   | 29.61               | 48.04 | 99.8                | 0.60            | 0.74            |      |      |
|                                                  | developing  | 7              | 2,056                     | 47.32                   | 30.38               | 64.91 | 98.1                |                 |                 |      |      |
|                                                  | before 2010 | 20             | 43,417                    | 47.97                   | 33.54               | 62.74 | 99.8                |                 |                 | 0.24 | 1.68 |
|                                                  | after 2010  | 18             | 38,506                    | 32.38                   | 21.68               | 45.31 | 99.5                |                 |                 |      |      |
| Workload or working hours                        | developed   | 15             | 20,970                    | 42.14                   | 31.35               | 53.72 | 98.6                | 0.34            | 1.39            |      |      |
|                                                  | developing  | 5              | 1,081                     | 25.72                   | 13.29               | 43.88 | 95.3                |                 |                 |      |      |
|                                                  | before 2010 | 9              | 19,456                    | 43.93                   | 29.43               | 59.54 | 98.8                |                 |                 | 0.41 | 1.21 |
|                                                  | after 2010  | 11             | 2,595                     | 32.70                   | 29.43               | 59.54 | 97.4                |                 |                 |      |      |
| Income                                           | developed   | 39             | 107,091                   | 34.01                   | 26.89               | 41.93 | 99.8                | 0.84            | 0.29            |      |      |
|                                                  | developing  | 11             | 2,700                     | 37.11                   | 27.06               | 48.41 | 96.4                |                 |                 |      |      |
|                                                  | before 2010 | 25             | 68,714                    | 37.01                   | 25.95               | 49.62 | 99.8                |                 |                 | 0.41 | 1.18 |
|                                                  | after 2010  | 25             | 41,077                    | 32.67                   | 26.04               | 40.07 | 98.9                |                 |                 |      |      |
| Length of training                               | developed   | 15             | 41,246                    | 33.95                   | 28.72               | 39.60 | 98.4                | 0.31            | 1.48            |      |      |
|                                                  | developing  | 3              | 800                       | 22.92                   | 10.94               | 41.85 | 94.0                |                 |                 |      |      |
|                                                  | before 2010 | 7              | 8,811                     | 26.72                   | 15.89               | 41.29 | 98.9                |                 |                 | 0.28 | 1.59 |
|                                                  | after 2010  | 11             | 33,234                    | 35.87                   | 29.67               | 42.59 | 96.9                |                 |                 |      |      |
| Prestige                                         | developed   | 17             | 27,987                    | 23.96                   | 19.20               | 29.47 | 97.3                | 0.01            | 4.71            |      |      |
|                                                  | developing  | 9              | 2,642                     | 47.65                   | 34.41               | 61.24 | 97.6                |                 |                 |      |      |
|                                                  | before 2010 | 12             | 25,542                    | 26.46                   | 20.78               | 33.03 | 96.7                |                 |                 | 0.25 | 1.67 |
|                                                  | after 2010  | 14             | 5,087                     | 35.22                   | 24.70               | 47.40 | 98.3                |                 |                 |      |      |
| Advice from others                               | developed   | 14             | 81,205                    | 25.95                   | 19.27               | 32.64 | 99.8                | 0.36            | 1.33            |      |      |
|                                                  | developing  | 4              | 1,487                     | 36.34                   | 18.91               | 53.77 | 98.1                |                 |                 |      |      |
|                                                  | before 2010 | 10             | 48,319                    | 22.93                   | 17.85               | 28.01 | 99.5                |                 |                 | 0.31 | 1.47 |
|                                                  | after 2010  | 8              | 34,373                    | 33.65                   | 25.12               | 42.18 | 99.1                |                 |                 |      |      |
| Student debt                                     | before 2010 | 5              | 6,610                     | 20.29                   | 15.86               | 25.57 | 81.8                | 0.69            | 0.59            |      |      |
|                                                  | after 2010  | 3              | 32,307                    | 11.08                   | 1.58                | 49.08 | 99.6                |                 |                 |      |      |

**Figure S1. Flow Diagram of the Study Inclusion.**

Figure S2. Forest Plot of “Academic Interest”.





**Figure S3. Forest Plot of “Competencies”.**

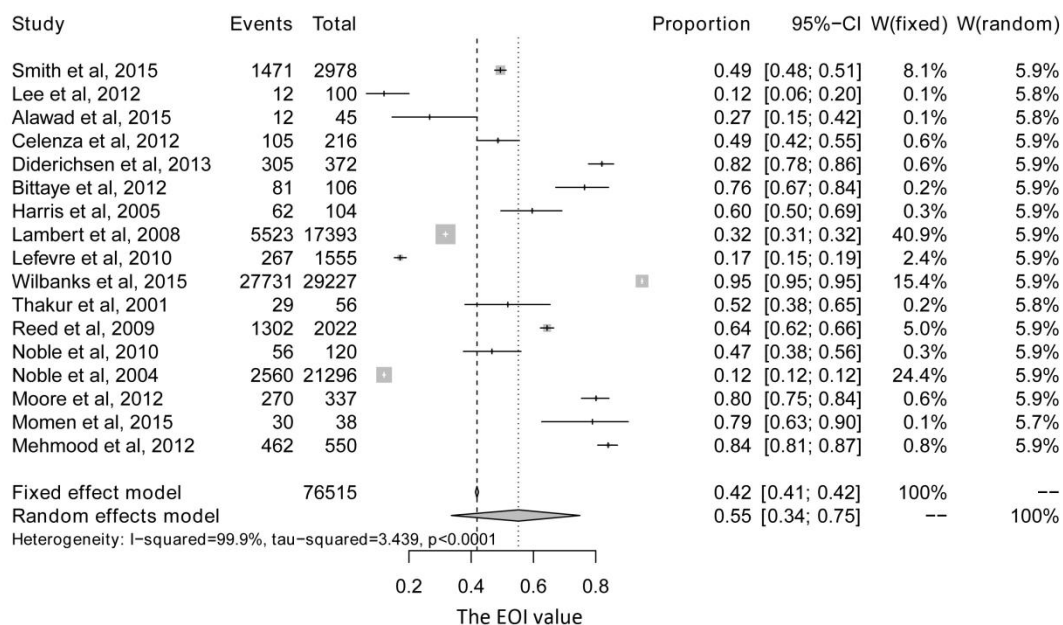

review only

Figure S4. Forest Plot of “Controllable Lifestyle or Flexible Work Schedule”.

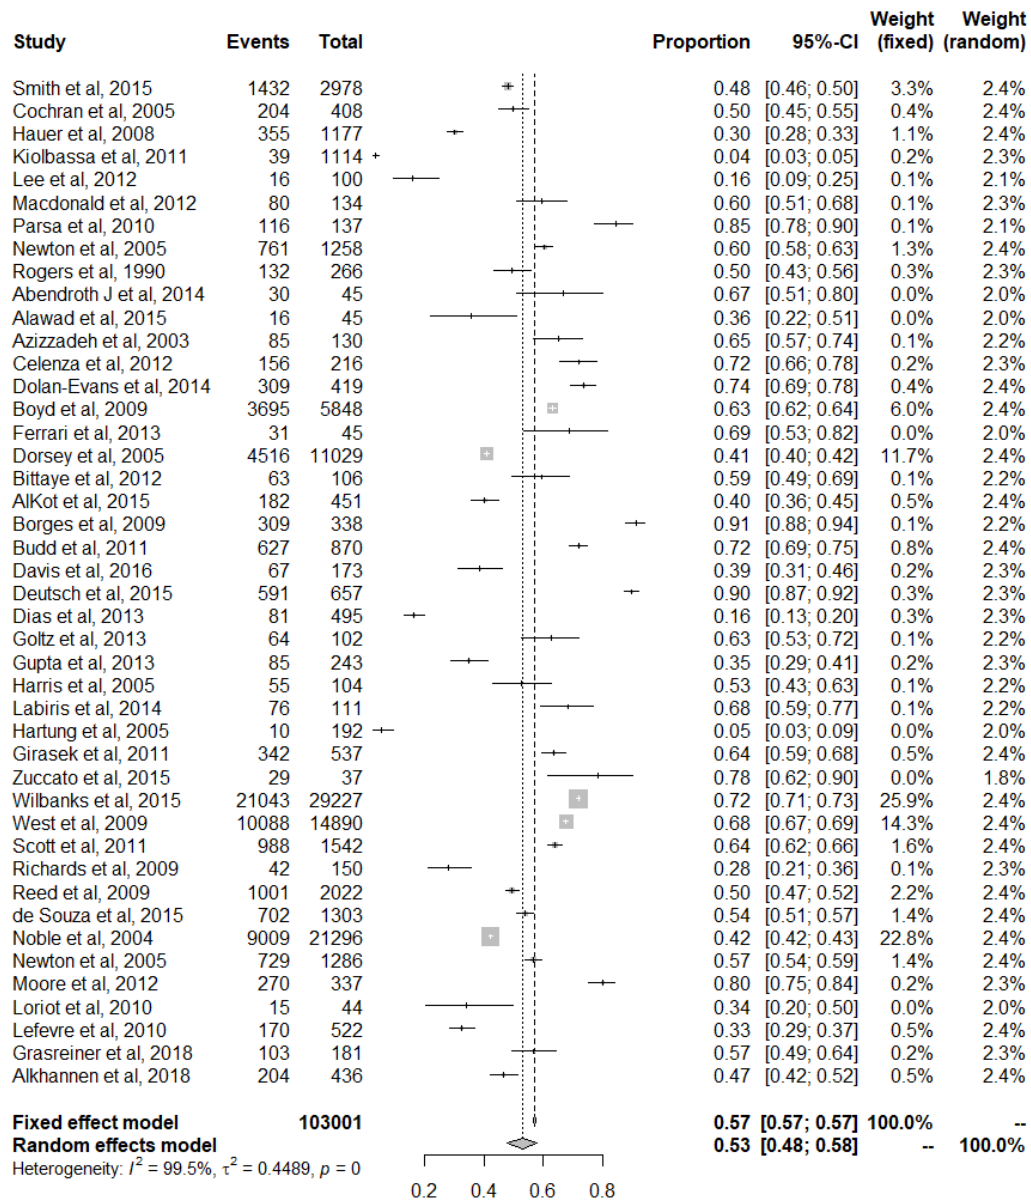

Figure S5. Forest Plot of “Patient Service Orientation”.



Figure S6. Forest Plot of “Medical Teachers or Mentors”.



**Figure S7. Forest Plot of “Career Opportunities”.**

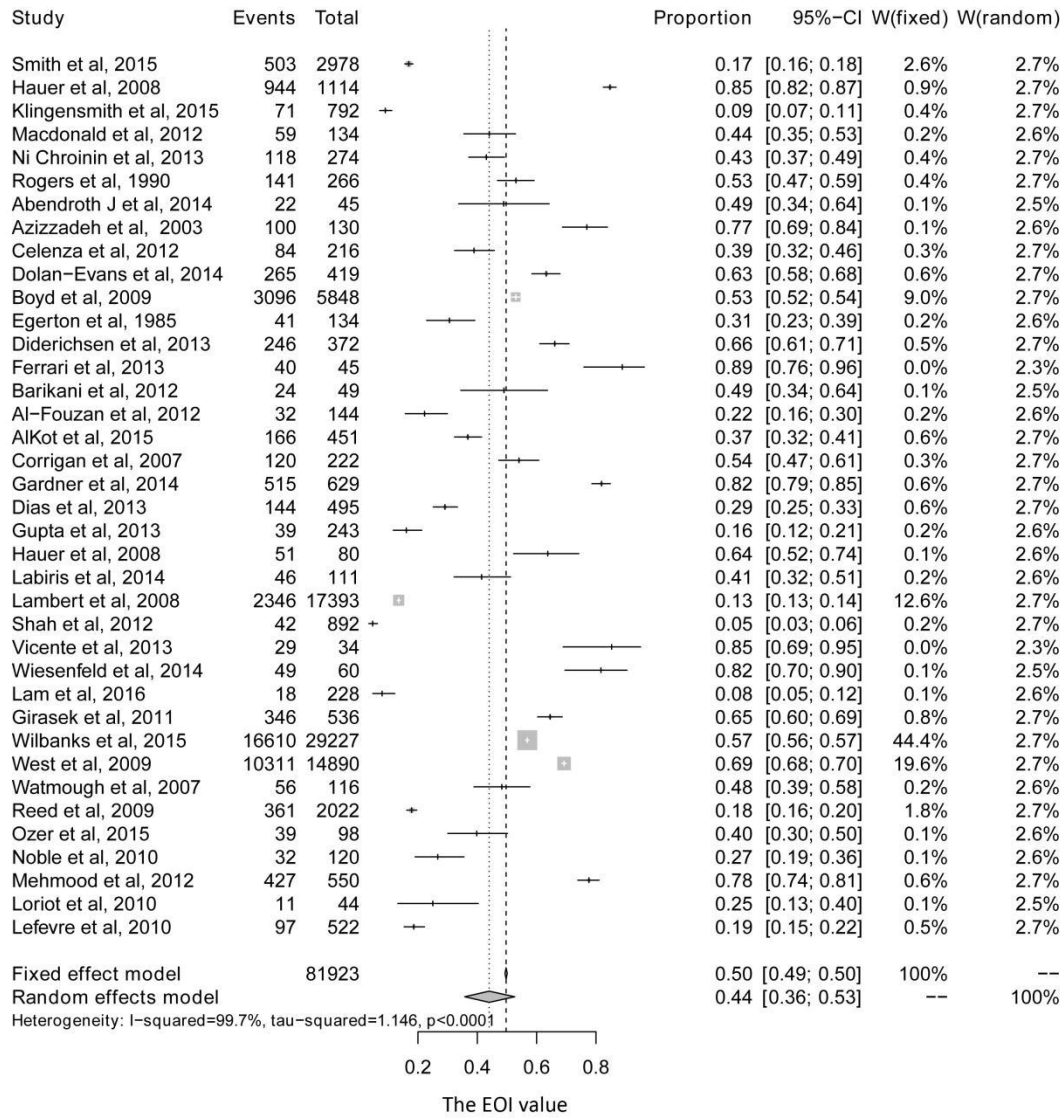

**Figure S8. Forest Plot of “Workload or Working Hours”.**



Figure S9. Forest Plot of “Income”.



**Figure S10. Forest Plot of “Length of Training”.**

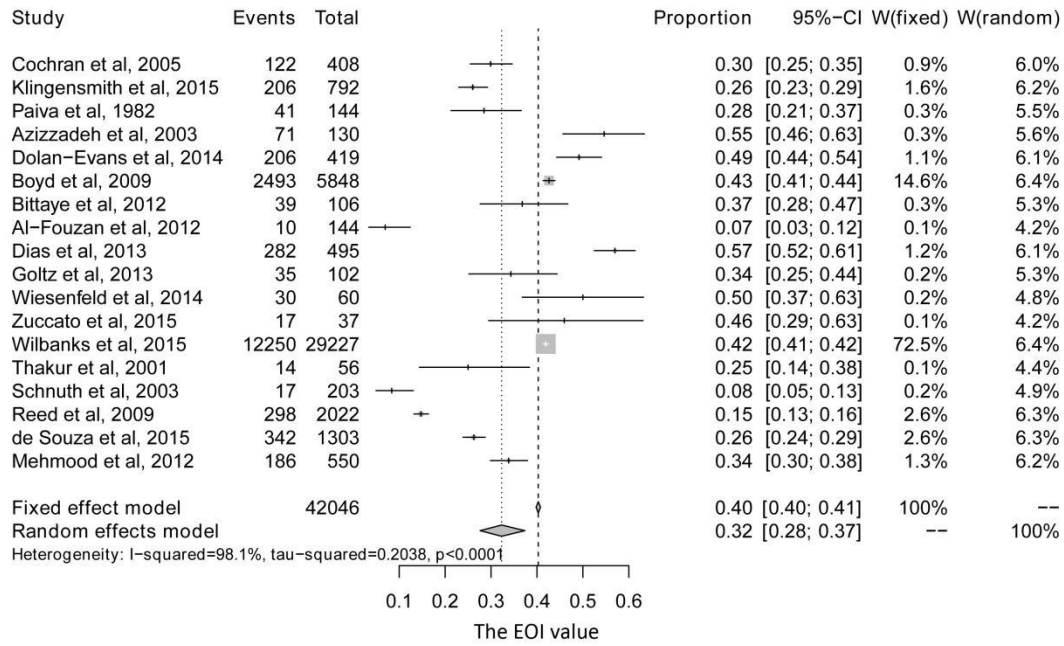



Figure S11. Forest Plot of “Prestige”.

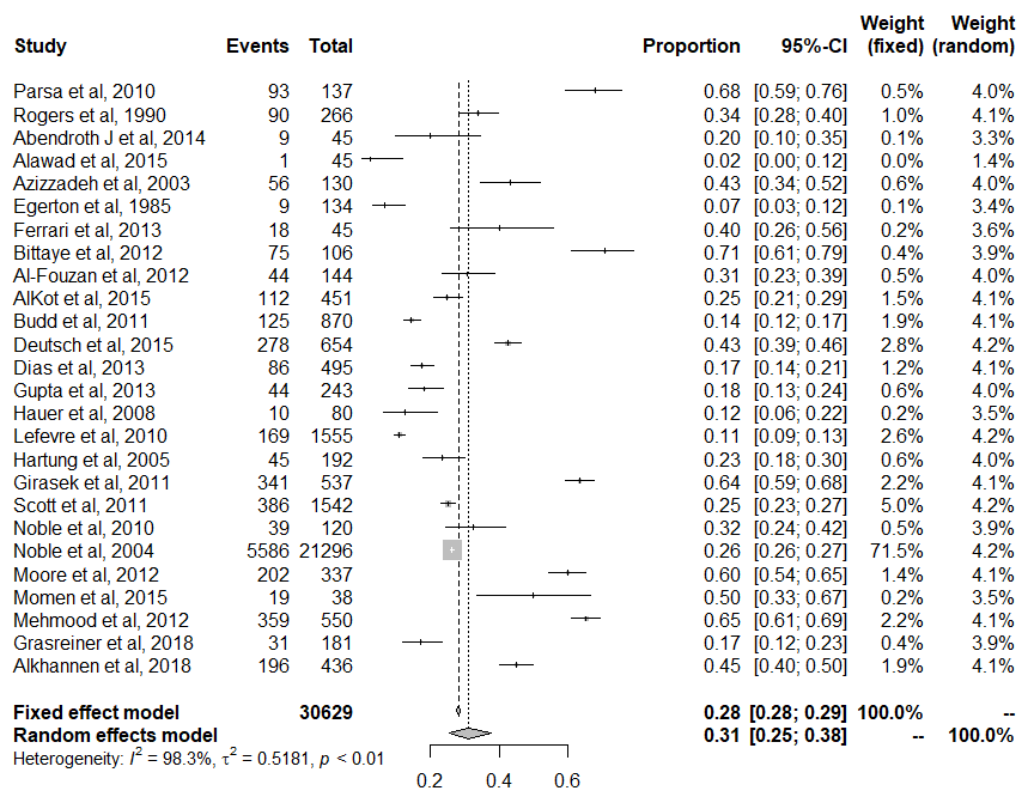

Figure S12. Forest Plot of “Advice from Others”.



Figure S13. Forest Plot of “Student Debt”.



Figure S14. Funnel Plots of the Publication Bias Testing of the 12 Factors.





# PRISMA 2009 Checklist

| Section/topic                      | #  | Checklist item                                                                                                                                                                                                                                                                                              | Reported on page # |
|------------------------------------|----|-------------------------------------------------------------------------------------------------------------------------------------------------------------------------------------------------------------------------------------------------------------------------------------------------------------|--------------------|
| <b>TITLE</b>                       |    |                                                                                                                                                                                                                                                                                                             |                    |
| Title                              | 1  | Identify the report as a systematic review, meta-analysis, or both.                                                                                                                                                                                                                                         | 1                  |
| <b>ABSTRACT</b>                    |    |                                                                                                                                                                                                                                                                                                             |                    |
| Structured summary                 | 2  | Provide a structured summary including, as applicable: background; objectives; data sources; study eligibility criteria, participants, and interventions; study appraisal and synthesis methods; results; limitations; conclusions and implications of key findings; systematic review registration number. | 2-3                |
| <b>INTRODUCTION</b>                |    |                                                                                                                                                                                                                                                                                                             |                    |
| Rationale                          | 3  | Describe the rationale for the review in the context of what is already known.                                                                                                                                                                                                                              | 4                  |
| Objectives                         | 4  | Provide an explicit statement of questions being addressed with reference to participants, interventions, comparisons, outcomes, and study design (PICOS).                                                                                                                                                  | 5                  |
| <b>METHODS</b>                     |    |                                                                                                                                                                                                                                                                                                             |                    |
| Protocol and registration          | 5  | Indicate if a review protocol exists, if and where it can be accessed (e.g., Web address), and, if available, provide registration information including registration number.                                                                                                                               | 3                  |
| Eligibility criteria               | 6  | Specify study characteristics (e.g., PICOS, length of follow-up) and report characteristics (e.g., years considered, language, publication status) used as criteria for eligibility, giving rationale.                                                                                                      | 5                  |
| Information sources                | 7  | Describe all information sources (e.g., databases with dates of coverage, contact with study authors to identify additional studies) in the search and date last searched.                                                                                                                                  | 5                  |
| Search                             | 8  | Present full electronic search strategy for at least one database, including any limits used, such that it could be repeated.                                                                                                                                                                               | 5                  |
| Study selection                    | 9  | State the process for selecting studies (i.e., screening, eligibility, included in systematic review, and, if applicable, included in the meta-analysis).                                                                                                                                                   | 5-6                |
| Data collection process            | 10 | Describe method of data extraction from reports (e.g., piloted forms, independently, in duplicate) and any processes for obtaining and confirming data from investigators.                                                                                                                                  | 6                  |
| Data items                         | 11 | List and define all variables for which data were sought (e.g., PICOS, funding sources) and any assumptions and simplifications made.                                                                                                                                                                       | 6                  |
| Risk of bias in individual studies | 12 | Describe methods used for assessing risk of bias of individual studies (including specification of whether this was done at the study or outcome level), and how this information is to be used in any data synthesis.                                                                                      | 6-7                |
| Summary measures                   | 13 | State the principal summary measures (e.g., risk ratio, difference in means).                                                                                                                                                                                                                               | 6-7                |
| Synthesis of results               | 14 | Describe the methods of handling data and combining results of studies, if done, including measures of consistency (e.g., $I^2$ ) for each meta-analysis.                                                                                                                                                   | 7                  |

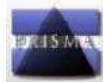

# PRISMA 2009 Checklist

Page 1 of 2

| Section/topic                 | #  | Checklist item                                                                                                                                                                                           | Reported on page # |
|-------------------------------|----|----------------------------------------------------------------------------------------------------------------------------------------------------------------------------------------------------------|--------------------|
| Risk of bias across studies   | 15 | Specify any assessment of risk of bias that may affect the cumulative evidence (e.g., publication bias, selective reporting within studies).                                                             | 7                  |
| Additional analyses           | 16 | Describe methods of additional analyses (e.g., sensitivity or subgroup analyses, meta-regression), if done, indicating which were pre-specified.                                                         | 7                  |
| <b>RESULTS</b>                |    |                                                                                                                                                                                                          |                    |
| Study selection               | 17 | Give numbers of studies screened, assessed for eligibility, and included in the review, with reasons for exclusions at each stage, ideally with a flow diagram.                                          | 5, 7               |
| Study characteristics         | 18 | For each study, present characteristics for which data were extracted (e.g., study size, PICOS, follow-up period) and provide the citations.                                                             | 7-8                |
| Risk of bias within studies   | 19 | Present data on risk of bias of each study and, if available, any outcome level assessment (see item 12).                                                                                                | 8                  |
| Results of individual studies | 20 | For all outcomes considered (benefits or harms), present, for each study: (a) simple summary data for each intervention group (b) effect estimates and confidence intervals, ideally with a forest plot. | 8                  |
| Synthesis of results          | 21 | Present results of each meta-analysis done, including confidence intervals and measures of consistency.                                                                                                  | 8-9                |
| Risk of bias across studies   | 22 | Present results of any assessment of risk of bias across studies (see Item 15).                                                                                                                          | 8-9                |
| Additional analysis           | 23 | Give results of additional analyses, if done (e.g., sensitivity or subgroup analyses, meta-regression [see Item 16]).                                                                                    | 8-9                |
| <b>DISCUSSION</b>             |    |                                                                                                                                                                                                          |                    |
| Summary of evidence           | 24 | Summarize the main findings including the strength of evidence for each main outcome; consider their relevance to key groups (e.g., healthcare providers, users, and policy makers).                     | 9-13               |
| Limitations                   | 25 | Discuss limitations at study and outcome level (e.g., risk of bias), and at review-level (e.g., incomplete retrieval of identified research, reporting bias).                                            | 13                 |
| Conclusions                   | 26 | Provide a general interpretation of the results in the context of other evidence, and implications for future research.                                                                                  | 14                 |
| <b>FUNDING</b>                |    |                                                                                                                                                                                                          |                    |
| Funding                       | 27 | Describe sources of funding for the systematic review and other support (e.g., supply of data); role of funders for the systematic review.                                                               | 15                 |

From: Moher D, Liberati A, Tetzlaff J, Altman DG, The PRISMA Group (2009). Preferred Reporting Items for Systematic Reviews and Meta-Analyses: The PRISMA Statement. PLoS Med 6(6): e1000097. doi:10.1371/journal.pmed1000097

For more information, visit: [www.prisma-statement.org](http://www.prisma-statement.org).

Page 2 of 2

For peer review only - <http://bmjopen.bmj.com/site/about/guidelines.xhtml>

## MOOSE Checklist for Meta-analyses of Observational Studies

| Item No                                     | Recommendation                                                                                                                                                                                                                                                               | Reported on Page No |
|---------------------------------------------|------------------------------------------------------------------------------------------------------------------------------------------------------------------------------------------------------------------------------------------------------------------------------|---------------------|
| Reporting of background should include      |                                                                                                                                                                                                                                                                              |                     |
| 1                                           | Problem definition                                                                                                                                                                                                                                                           | 5                   |
| 2                                           | Hypothesis statement                                                                                                                                                                                                                                                         | 5                   |
| 3                                           | Description of study outcome(s)                                                                                                                                                                                                                                              | 5                   |
| 4                                           | Type of exposure or intervention used                                                                                                                                                                                                                                        | 5                   |
| 5                                           | Type of study designs used                                                                                                                                                                                                                                                   | 5                   |
| 6                                           | Study population                                                                                                                                                                                                                                                             | 5                   |
| Reporting of search strategy should include |                                                                                                                                                                                                                                                                              |                     |
| 7                                           | Qualifications of searchers (eg, librarians and investigators)                                                                                                                                                                                                               | 6                   |
| 8                                           | Search strategy, including time period included in the synthesis and key words                                                                                                                                                                                               | 5                   |
| 9                                           | Effort to include all available studies, including contact with authors                                                                                                                                                                                                      | 5                   |
| 10                                          | Databases and registries searched                                                                                                                                                                                                                                            | 5                   |
| 11                                          | Search software used, name and version, including special features used (eg, explosion)                                                                                                                                                                                      | 6                   |
| 12                                          | Use of hand searching (eg, reference lists of obtained articles)                                                                                                                                                                                                             | 5                   |
| 13                                          | List of citations located and those excluded, including justification                                                                                                                                                                                                        | 5-6                 |
| 14                                          | Method of addressing articles published in languages other than English                                                                                                                                                                                                      | 5                   |
| 15                                          | Method of handling abstracts and unpublished studies                                                                                                                                                                                                                         | 5                   |
| 16                                          | Description of any contact with authors                                                                                                                                                                                                                                      | 5                   |
| Reporting of methods should include         |                                                                                                                                                                                                                                                                              |                     |
| 17                                          | Description of relevance or appropriateness of studies assembled for assessing the hypothesis to be tested                                                                                                                                                                   | 6                   |
| 18                                          | Rationale for the selection and coding of data (eg, sound clinical principles or convenience)                                                                                                                                                                                | 6-7                 |
| 19                                          | Documentation of how data were classified and coded (eg, multiple raters, blinding and interrater reliability)                                                                                                                                                               | 6-7                 |
| 20                                          | Assessment of confounding (eg, comparability of cases and controls in studies where appropriate)                                                                                                                                                                             | 6                   |
| 21                                          | Assessment of study quality, including blinding of quality assessors, stratification or regression on possible predictors of study results                                                                                                                                   | 6                   |
| 22                                          | Assessment of heterogeneity                                                                                                                                                                                                                                                  | 6                   |
| 23                                          | Description of statistical methods (eg, complete description of fixed or random effects models, justification of whether the chosen models account for predictors of study results, dose-response models, or cumulative meta-analysis) in sufficient detail to be replicated | 6-7                 |
| 24                                          | Provision of appropriate tables and graphics                                                                                                                                                                                                                                 | 5-7                 |
| Reporting of results should include         |                                                                                                                                                                                                                                                                              |                     |
| 25                                          | Graphic summarizing individual study estimates and overall estimate                                                                                                                                                                                                          | 8                   |
| 26                                          | Table giving descriptive information for each study included                                                                                                                                                                                                                 | 7                   |
| 27                                          | Results of sensitivity testing (eg, subgroup analysis)                                                                                                                                                                                                                       | 8                   |
| 28                                          | Indication of statistical uncertainty of findings                                                                                                                                                                                                                            | 7-9                 |

| Item No                                 | Recommendation                                                                                                            | Reported on Page No |
|-----------------------------------------|---------------------------------------------------------------------------------------------------------------------------|---------------------|
| Reporting of discussion should include  |                                                                                                                           |                     |
| 29                                      | Quantitative assessment of bias (eg, publication bias)                                                                    | 13                  |
| 30                                      | Justification for exclusion (eg, exclusion of non-English language citations)                                             | 13-14               |
| 31                                      | Assessment of quality of included studies                                                                                 | 13-14               |
| Reporting of conclusions should include |                                                                                                                           |                     |
| 32                                      | Consideration of alternative explanations for observed results                                                            | 14                  |
| 33                                      | Generalization of the conclusions (ie, appropriate for the data presented and within the domain of the literature review) | 14                  |
| 34                                      | Guidelines for future research                                                                                            | 14                  |
| 35                                      | Disclosure of funding source                                                                                              | 15                  |

From: Stroup DF, Berlin JA, Morton SC, et al, for the Meta-analysis Of Observational Studies in Epidemiology (MOOSE) Group. Meta-analysis of Observational Studies in Epidemiology. A Proposal for Reporting. *JAMA*. 2000;283(15):2008-2012. doi: 10.1001/jama.283.15.2008.

Transcribed from the original paper within the NEUROSURGERY® Editorial Office, Atlanta, GA, United States. August 2012.

# BMJ Open

## Factors Influencing Subspecialty Choice Among Medical Students: A Systematic Review and Meta-analysis

|                                 |                                                                                                                                                                                                                                                                                                                                                                                                                                                                                                                                                                                                                                                                                                                                                                                                                                                                                                                                                                                                                                                                                                          |
|---------------------------------|----------------------------------------------------------------------------------------------------------------------------------------------------------------------------------------------------------------------------------------------------------------------------------------------------------------------------------------------------------------------------------------------------------------------------------------------------------------------------------------------------------------------------------------------------------------------------------------------------------------------------------------------------------------------------------------------------------------------------------------------------------------------------------------------------------------------------------------------------------------------------------------------------------------------------------------------------------------------------------------------------------------------------------------------------------------------------------------------------------|
| Journal:                        | <i>BMJ Open</i>                                                                                                                                                                                                                                                                                                                                                                                                                                                                                                                                                                                                                                                                                                                                                                                                                                                                                                                                                                                                                                                                                          |
| Manuscript ID                   | bmjopen-2018-022097.R3                                                                                                                                                                                                                                                                                                                                                                                                                                                                                                                                                                                                                                                                                                                                                                                                                                                                                                                                                                                                                                                                                   |
| Article Type:                   | Research                                                                                                                                                                                                                                                                                                                                                                                                                                                                                                                                                                                                                                                                                                                                                                                                                                                                                                                                                                                                                                                                                                 |
| Date Submitted by the Author:   | 15-Jan-2019                                                                                                                                                                                                                                                                                                                                                                                                                                                                                                                                                                                                                                                                                                                                                                                                                                                                                                                                                                                                                                                                                              |
| Complete List of Authors:       | <p>Yang, Yahan; Sun Yat-Sen University Zhongshan Ophthalmic Center, State Key Laboratory of Ophthalmology; Sun Yat-Sen University, Zhongshan School of Medicine</p> <p>Li, Jiawei; Sun Yat-Sen University, Zhongshan School of Mathematics</p> <p>Wu, Xiaohang; Sun Yat-Sen University Zhongshan Ophthalmic Center, State Key Laboratory of Ophthalmology</p> <p>Wang, Jinghui; Sun Yat-Sen University Zhongshan Ophthalmic Center, State Key Laboratory of Ophthalmology</p> <p>Li, Wangting; Sun Yat-Sen University Zhongshan Ophthalmic Center, State Key Laboratory of Ophthalmology</p> <p>Zhu, Yi; University of Miami School of Medicine, Department of Molecular and Cellular Pharmacology; Sun Yat-Sen University Zhongshan Ophthalmic Center, Cataract</p> <p>Chen, Chuan; State Key Laboratory of Ophthalmology, Zhongshan Ophthalmic Center, Sun Yat-sen University; University of Miami School of Medicine, Department of Molecular and Cellular Pharmacology</p> <p>Lin, Haotian; State Key Laboratory of Ophthalmology, Zhongshan Ophthalmic Center, Sun Yat-sen University, Cataract</p> |
| <b>Primary Subject Heading</b>: | Medical education and training                                                                                                                                                                                                                                                                                                                                                                                                                                                                                                                                                                                                                                                                                                                                                                                                                                                                                                                                                                                                                                                                           |
| Secondary Subject Heading:      | Medical education and training                                                                                                                                                                                                                                                                                                                                                                                                                                                                                                                                                                                                                                                                                                                                                                                                                                                                                                                                                                                                                                                                           |
| Keywords:                       | Medical students, Career choice, Meta-analysis                                                                                                                                                                                                                                                                                                                                                                                                                                                                                                                                                                                                                                                                                                                                                                                                                                                                                                                                                                                                                                                           |
|                                 |                                                                                                                                                                                                                                                                                                                                                                                                                                                                                                                                                                                                                                                                                                                                                                                                                                                                                                                                                                                                                                                                                                          |

SCHOLARONE™  
Manuscripts



1  
2  
3  
4  
5 **1 Title Page**  
6  
7

8 **2 Factors Influencing Subspecialty Choice Among Medical Students: A Systematic**  
9  
10 **3 Review and Meta-analysis**  
11  
12

13 4 Yahan Yang, M.D.<sup>1,2</sup>; Jiawei Li, M.D.<sup>3</sup>; Xiaohang Wu, M.D.<sup>1</sup>; Jinghui Wang, M.D.<sup>1</sup>;  
14  
15 Wangting Li, M.D.<sup>1</sup>; Yi Zhu, M.D.<sup>1,4</sup>; Chuan Chen, M.D.<sup>1,4</sup>; Haotian Lin, M.D., Ph.  
16  
17 D<sup>1#</sup>  
18  
19  
20  
21  
22  
23

24 **8 Institution:** 1. State Key Laboratory of Ophthalmology, Zhongshan Ophthalmic  
25  
26 9 Center, Sun Yat-sen University, Guangzhou, Guangdong, 510060, People's Republic  
27  
28 of China  
29  
30

31  
32 11 2. Zhongshan School of Medicine, Sun Yat-sen University, Guangzhou, China  
33  
34

35 12 3. Zhongshan School of Mathematics, Sun Yat-sen University, Guangzhou, China  
36  
37

38 13 4. Department of Molecular and Cellular Pharmacology, University of Miami Miller  
39  
40 14 School of Medicine, Miami, Florida 33136, USA.  
41  
42  
43  
44  
45  
46

47 **16 #Editorial Correspondence:**  
48  
49

50 17 Prof. Haotian Lin  
51  
52

53 18 Zhongshan Ophthalmic Center, Sun Yat-sen University  
54  
55  
56  
57  
58  
59  
60

1  
2  
3  
4  
5 19 Xian Lie South Road 54#  
6  
7

8 20 Guangzhou, China, 510060.  
9

10  
11 21 Telephone number: +86-020-87330493  
12

13  
14 22 Fax: +86-020-87333271  
15

16  
17 23 E-mail: haot.lin@hotmail.com  
18

19  
20 24 Word count for text: 3122  
21

22  
23  
24 25  
25  
26  
27  
28  
29  
30  
31  
32  
33  
34  
35  
36  
37  
38  
39  
40  
41  
42  
43  
44  
45  
46  
47  
48  
49  
50  
51  
52  
53  
54  
55  
56  
57  
58  
59  
60

1  
2  
3  
4  
5 26 **ABSTRACT**  
6  
7

8 27 **Objective** To characterize the contributing factors that affect medical students'  
9  
10 28 subspecialty choice and to estimate the extent of influence of individual factors  
11  
12 29 on the students' decision-making process.  
13  
14

15 30 **Design** Systematic review and meta-analysis.  
16  
17

18 31 **Methods** A systematic search of the Cochrane Library, ERIC, Web of Science, CNKI  
19  
20 32 and PubMed databases was conducted for studies published between January  
21  
22 33 1977 and June 2018. Information concerning study characteristics, influential  
23  
24 34 factors, and the extent of their influence (EOI) was extracted independently by  
25  
26 35 two trained investigators. EOI is the percentage level that describes how much  
27  
28 36 each of the factors influenced students' choice of subspecialty. The recruited  
29  
30 37 medical students include students in medical school, internship, residency  
31  
32 38 training and fellowship, who are about to or have just made a specialty choice.  
33  
34 39 The estimates were pooled using a random-effects meta-analysis model due to  
35  
36 40 the between-study heterogeneity.  
37  
38  
39  
40  
41

42 41 **Results** Data were extracted from 75 studies (882,209 individuals). Overall, the factors  
43  
44 42 influencing medical students' choice of subspecialty training mainly included  
45  
46 43 academic interests (75.29%), competencies (55.15%), controllable lifestyles or  
47  
48 44 flexible work schedules (53.00%), patient service orientation (50.04%),  
49  
50 45 medical teachers or mentors (46.93%), career opportunities (44.00%),  
51  
52 46 workload or working hours (37.99%), income (34.70%), length of training  
53  
54  
55  
56  
57  
58  
59  
60

1  
2  
3  
4  
5 47 (32.30%), prestige (31.17%), advice from others (28.24%), and student debt  
6  
7 48 (15.33%), with significant between-study heterogeneity ( $P<0.0001$ ). Subgroup  
8  
9 49 analyses revealed that the EOI of academic interests was higher in developed  
10  
11 50 countries than that in developing countries (79.66% [95% confidence interval  
12  
13 51 (CI), 70.73%; 86.39%] vs. 60.41% [95% CI, 43.44%; 75.19%];  $Q=3.51$   
14  
15  
16 52  $P=0.02$ ). The EOI value of prestige was lower in developed countries than that  
17  
18 53 in developing countries (23.96% [95% CI, 19.20%; 29.47%] vs. 47.65% [95%  
19  
20 54 CI, 34.41%; 61.24%];  $Q=4.71$   $P=0.01$ ).

21  
22  
23  
24 55 **Conclusions** This systematic review and meta-analysis provided a quantitative  
25  
26 56 evaluation of the top 12 influencing factors associated with medical students'  
27  
28 57 choice of subspecialty. Our findings provide the basis for the development of  
29  
30 58 specific, effective strategies to optimize the distribution of physicians among  
31  
32 59 different departments by modifying these influencing factors.

33  
34  
35  
36 60 **Systematic review registration** PROSPERO CRD42017053781.

## 37 38 39 61 **STRENGTHS AND LIMITATIONS OF THIS STUDY**

- 40  
41  
42 62 ● This is the first study that provide a systematic estimate of the factors associated  
43  
44 63 with medical students' subspecialty choices.
- 45  
46  
47 64 ● A large number of studies conducted in varied populations have been included.
- 48  
49  
50 65 ● The differences in the characteristics of country, survey years, specialty, the type  
51  
52 66 of data used and sample size across studies represent a major limitation of our  
53  
54  
55 67 study.

1  
2  
3  
4  
5  
6  
7  
8  
9  
10  
11  
12  
13  
14  
15  
16  
17  
18  
19  
20  
21  
22  
23  
24  
25  
26  
27  
28  
29  
30  
31  
32  
33  
34  
35  
36  
37  
38  
39  
40  
41  
42  
43  
44  
45  
46  
47  
48  
49  
50  
51  
52  
53  
54  
55  
56  
57  
58  
59  
60

68    KEYWORDS Medical students, career choice, meta-analysis

69

70

For peer review only

## 72 **Introduction**

73 Because of the population aging, increased workload on doctors through increased  
74 number of consultations and in managing patients with multi-morbidity, the demand  
75 for physicians continues to increase; however, an imbalance in the supply of physicians  
76 in different subspecialties has become a growing concern in both developed and  
77 developing countries.<sup>1-5</sup> Some specialties and subspecialties, such as family medicine  
78 and palliative medicine,<sup>6,7</sup> are experiencing a desperate shortage of physicians, whereas  
79 other specialties and subspecialties, such as cardiology, ophthalmology and ear, nose  
80 and throat (ENT) surgery, are highly competitive specialties with low success rate for  
81 candidates.<sup>8,9</sup>

82 Specialty choice is the product of a complex interconnection of student expectation,  
83 department expectation, and competition for available spots, and student choice is  
84 where the choice begins.<sup>10</sup> Previous studies have suggested that medical students'  
85 choice of subspecialty is essential to the maintenance of an adequate medical  
86 workforce and a balanced development of the medical system.<sup>11, 12</sup> However, the  
87 influencing factors underlying students' subspecialty choice have not been  
88 systemically reviewed. Recent changes in the training and practice environment may  
89 influence medical students' career choice.<sup>13</sup> Additionally, the variability in preferences  
90 over time and in students' attitudes towards career choices can further complicate this  
91 assessment. For example, a study in the UK indicated that half of the medical students  
92 made a definitive subspecialty choice during their first year of medical school.<sup>14</sup>  
93 However, students were prone to changing their subspecialty preference during

1  
2  
3  
4  
5 94 medical school and internship.<sup>15</sup> Notably, students may also reject certain  
6  
7 95 subspecialties during their medical school training, even those they have previously  
8  
9 96 seriously considered.<sup>16</sup> Therefore, identifying the factors that influence students'  
10  
11 97 choice of subspecialty will enable a better understanding of the current  
12  
13 98 shortage/overload of physicians in specific fields and contribute to policy-building and  
14  
15 99 decision-making to improve the training and recruitment of students in the future.

16  
17  
18  
19 100 We thus conducted a systematic review and a meta-analysis to investigate the  
20  
21 101 influencing factors and the extent of their influence on the choice of subspecialty  
22  
23 102 training among medical students. More specifically, we focused on the following  
24  
25 103 questions. First, can we gain a better understanding of students' preferences for  
26  
27 104 medical specialty according to the primary influencing factor? Second, do the  
28  
29 105 subgroups according to world region and survey years examined in this study differ  
30  
31 106 significantly with regard to the weight that students place on the identified influencing  
32  
33 107 factor?  
34  
35  
36  
37

## 38 108 **Methods**

39  
40  
41 109 We developed a review protocol (registration number: PROSPERO  
42  
43 110 CRD42017053781) prior to commencing the study. The Preferred Reporting Items for  
44  
45 111 Systematic Reviews and Meta-Analyses (PRISMA) guidelines was used to ensure the  
46  
47 112 reporting quality of this review (Fig. S1).<sup>17</sup>  
48  
49  
50

## 51 113 **Search Strategy and Study Eligibility**

52  
53  
54  
55 114 We performed a literature search in June 2018 using the Cochrane Library, Medline,  
56

1  
2  
3  
4  
5 115 Web of Science, CNKI and ERIC databases without language restrictions. Articles  
6  
7 116 were screened by title, abstract and reference list, and by correspondence with study  
8  
9 117 investigators. Potentially relevant papers were first identified by reviewing the titles  
10  
11 118 and abstracts, and the full text of each retrieved article was then assessed. A detailed  
12  
13 119 example of search strategy for Medline/PubMed is shown in **Methods S1**. Studies were  
14  
15 120 included if they were systematic review or cross-sectional studies, reported data on  
16  
17 121 medical students, were published in peer-reviewed journals, and used a validated  
18  
19 122 method to assess the EOI on the choice of subspecialty, such as pediatric  
20  
21 123 gastroenterology and vascular surgery, or its corresponding specialty, such as  
22  
23 124 pediatrics and surgery. Because of the differences between medical education systems  
24  
25 125 in the world, the medical students we recruited includes the student in medical school,  
26  
27 126 internship, residency training and fellowship, containing the students who about to  
28  
29 127 make a specialty choice and students who has just made a specialty choice. A guide to  
30  
31 128 medical specialty, available at [https://www.abms.org/member-boards/specialty-  
34  
35 130 subspecialty-certificates/](https://www.abms.org/member-boards/specialty-<br/>32<br/>33 129 subspecialty-certificates/), were used to identify the medical specialty and subspecialty  
36  
37 131 of our research. We also conducted an additional search using OpenGrey. However,  
38  
39 132 no additional articles were further included. All searches were performed using Google  
40  
41  
42  
43  
44  
45  
46

### 47 133 **Data Extraction and Quality Assessment**

48  
49  
50 134 Each article was reviewed by two trained investigators (Y.Y. and J.L.) and the  
51  
52 135 following information was independently extracted from each selected article using a  
53  
54 136 standardized form: study design, geographic location, years of survey, journal, sample  
55  
56  
57  
58  
59  
60



1  
2  
3  
4  
5 137 size, average age of the participants, the number and percentage of male participants,  
6  
7 138 and the influencing factors and the extent of their influence. A third investigator was  
8  
9 139 consulted if disagreements occurred. Each study may involve one or several  
10  
11 140 influencing factors. An 11-item checklist which was recommended by Agency for  
12  
13 141 Healthcare Research and Quality (AHRQ), used for cross-sectional studies<sup>18</sup>, available  
14  
15 142 at <https://www.ncbi.nlm.nih.gov/books/NBK35156/>, were used to assess the quality of  
16  
17 143 the studies. All discrepancies were resolved via discussion and consensus.  
18  
19  
20

#### 21 144 **Statistical Analysis**

22  
23  
24 145 As considerable heterogeneity was expected because of the multiple sources of  
25  
26 146 variances, a random effects meta-analysis model was used to estimate the influencing  
27  
28 147 factors and the extent of their influence.<sup>19</sup> Between-study heterogeneity was assessed  
29  
30 148 using the Cochran's Q-test, and was quantified with the  $I^2$  statistic, which was  
31  
32 149 calculated to describe the percentage of total variation caused by heterogeneity across  
33  
34 150 studies, with  $\geq 50\%$  indicating considerable heterogeneity.<sup>20 21</sup> Potential sources of  
35  
36 151 heterogeneity were identified using meta-regression.<sup>22</sup> Four categorical covariates  
37  
38 152 were defined as potential sources of heterogeneity by examining the studies conducted  
39  
40 153 in the United States (US) vs. the studies conducted in other countries, the studies  
41  
42 154 conducted before 2010 vs. those conducted after 2010, the studies concerning  
43  
44 155 subspecialty only vs. those that were not specific to a subspecialty, and the studies with  
45  
46 156 a sample size  $< 200$  vs. the studies with a sample size  $\geq 200$ . Subgroup analyses were  
47  
48 157 performed for each factor in the studies in developed countries vs. developing countries  
49  
50 158 and studies conducted before 2010 vs. after 2010. The EOI value of competencies in  
51  
52  
53  
54  
55  
56

1  
2  
3  
4  
5 159 developing countries was not statistically significant (81.21% [95% CI, 75.27%;  
6  
7 160 86.51%],  $P=0.1436$ ), and no studies on the influence of student debt in developing  
8  
9 161 countries were found. The Q-test based on the analysis of variance was used to compare  
10  
11 162 the subgroups, with a significance threshold of 5%.<sup>23</sup> The influence of individual  
12  
13 163 studies on the overall EOI value was explored by serially excluding each study in a  
14  
15 164 sensitivity analysis. Publication bias was investigated using a funnel plot test and  
16  
17 165 Egger's test.<sup>24 25</sup> Fill and trim approach, which imputes estimates from hypothetical  
18  
19 166 negative unpublished reports,<sup>26</sup> was also used to investigate the publication bias if the  
20  
21 167 Egger's test was significant. All analyses were performed using R  
22  
23 168 (version 3.3.1, The R Foundation, Vienna, Austria). The statistical tests were 2-sided  
24  
25 169 with a significance threshold of  $P<0.05$ .

26  
27  
28  
29  
30  
31 170 **Patient and public involvement:** Patients and the public were not involved in  
32  
33 171 development of the research question and outcome measures, nor the study design. The  
34  
35 172 study does not involve patient recruitment, and patients were not involved in conduct  
36  
37 173 of the study. We plan to liaise closely with patients, special interest groups, and  
38  
39 174 charities in the dissemination of our results in printed and electronic media.

## 40 41 42 43 175 **Results**

### 44 45 46 176 **Study Characteristics**

47  
48  
49 177 Seventy-five cross-sectional studies involving a total of 882,209 individuals that  
50  
51 178 published between January 1977 and May 2018 were included in the present research  
52  
53 179 **(Table 1)**. Thirty-four studies were conducted in North America, 24 in Europe, 7 in

1  
2  
3  
4  
5 180 Asia, 5 in Oceania, 3 in Africa, and 2 in South America. The median number of  
6  
7 181 participants per study was 243 (range 37-29,227). Fourteen studies included students  
8  
9 182 who had already selected subspecialties, whereas 61 did not. The influencing factors  
10  
11 183 were ranked according to the frequency of occurrence and each factor was identified  
12  
13 184 when at least 5 papers were available describing it. The influencing factors for  
14  
15 185 subspecialty choice were then classified according to 17 aspects, including academic  
16  
17 186 interests, controllable lifestyle or flexible work schedule (defined as flexibility that  
18  
19 187 allows physicians to control the number of hours devoted to practicing the specialty),  
20  
21 188 competencies, patient service orientation, medical teachers or mentors, career  
22  
23 189 opportunities, workload or working hours (characterized by the physician's time spent  
24  
25 190 on professional responsibilities), income, prestige, length of training, advice from  
26  
27 191 others (advice from family, friends, and other students), student debt, experience with  
28  
29 192 the subject, working environment, personality, gender and job security. Personality and  
30  
31 193 gender are common factors that affect the choice of subspecialty among medical  
32  
33 194 students, but most of the relevant literature has not reported on the extent of these  
34  
35 195 factors' influence. Moreover, the funnel plots were clearly asymmetrical with regard  
36  
37 196 to experience with the subject, the working environment and job variety, indicating the  
38  
39 197 existence of publication bias. Thus, the analysis of the remaining 12 influencing factors  
40  
41 198 were shown in this paper. Studies assessed for influencing factors using questionnaires  
42  
43 199 validated to medical students asking the extent of certain factors the studies  
44  
45 200 investigated. Quality assessment scores for the included studies are listed in **Table 1**.  
46  
47 201 None of the studies received a point for the second AHRQ Quality Indicator, which  
48  
49 202 requires studies to list the inclusion and exclusion criteria for exposed and unexposed  
50  
51  
52  
53  
54  
55  
56  
57  
58  
59  
60

1  
2  
3  
4  
5 203 subjects (cases and controls) or refer to previous publications, since no comparison  
6  
7 204 studies were referenced in the analyzed articles. For the remaining 10 criteria, 6 studies  
8  
9 205 received 9 points, 8 studies received 8 points, 17 studies received 7 points, 33 studies  
10  
11 206 received 6 points, 9 studies received 5 points and 2 studies received 4 points (scores  
12  
13  
14 207 for individual studies are presented in **Table S1**).

### 17 208 **Primary Analysis**

19  
20 209 A meta-analysis was performed on the 12 influencing factors (**Table 2**): academic  
21  
22 210 interests (**Fig. S2**), competencies (**Fig. S3**), controllable lifestyle or flexible work  
23  
24 211 schedule (**Fig. S4**), patient service orientation (**Fig. S5**), medical teachers or mentors  
25  
26 212 (**Fig. S6**), career opportunities (**Fig. S7**), workload or working hours (**Fig. S8**), income  
27  
28 213 (**Fig. S9**), length of training (**Fig. S10**), prestige (**Fig. S11**), advice from others (**Fig.**  
29  
30 214 **S12**) and student debt (**Fig. S13**). All the factors were significant with evidence of  
31  
32 215 between-study heterogeneity ( $P<0.0001$ ). A sensitivity analysis, in which the meta-  
33  
34 216 analysis was serially repeated after the exclusion of each study, demonstrated that no  
35  
36 217 individual study affected the overall extent of a factor's influence.

### 41 218 **Meta-regression and Subgroup Analysis**

42  
43  
44  
45 219 We performed meta-regression to identified the potential sources of heterogeneity  
46  
47 220 using common instructions when at least 5 studies were available and at least 2 studies  
48  
49 221 were in each comparator subgroup (**Table 3**). Some of the heterogeneities observed  
50  
51 222 among the 12 factors can be partially explained by country, survey years, specialty and  
52  
53 223 sample size.

1  
2  
3  
4  
5 224 EOI values were further analyzed by subgroup (**Table S2**) according to world region  
6  
7 225 (**Fig. 1**) and survey year (**Fig. 2**). The EOI value of academic interests in developed  
8  
9 226 countries was higher than that in developing countries (79.66% [95% CI, 70.73%;  
10  
11 227 86.39% vs. 60.41% [95% CI, 43.44%; 75.19%];  $Q=3.51$   $P=0.02$ ). Conversely, a lower  
12  
13 228 EOI value of prestige was found in studies conducted in developed countries than in  
14  
15 229 developing countries (23.96% [95% CI, 19.20%; 29.47%] vs. 47.65% [95% CI,  
16  
17 230 34.41%; 61.24%];  $Q=4.71$   $P=0.01$ ). No statistically significant subgroup differences  
18  
19 231 in the EOI values of the other influencing factors were noted between developed  
20  
21 232 countries and developing countries. In addition, no statistically significant differences  
22  
23 233 in the EOI values of the influencing factors were observed when subgroup analysis  
24  
25 234 was performed by survey year.

### 235 **Assessment of Publication Bias**

236 We generated a funnel plot with proportion as the abscissa and standard error as the  
237 ordinate. A visual inspection of the funnel plots revealed minimal asymmetry among  
238 the various influencing factors (**Fig. S14**), and the results were concentrated in the  
239 narrow upper part of the graph. There was evidence of small study effect in the meta-  
240 analysis of “patient service orientation” (Egger’s test  $P=0.02$ ). However, the trim-and-  
241 fill method showed the publication-bias corrected estimate remained statistically  
242 significant (63.79%, 95% CI, 58.20%; 69.04%).

### 243 **Discussion**

### 244 **Implications**

1  
2  
3  
4  
5 245 This systematic review and meta-analysis involved 75 studies with 882,209 medical  
6  
7 246 students. Twelve influencing factors were analyzed. These factors can be classified  
8  
9 247 into two categories: economic factors and non-economic factors. We found that the  
10  
11 248 EOI of the economic factors, including income (34.70%) and student debt (15.33%),  
12  
13 249 may not depend on the region's level of economic development. However, income  
14  
15 250 remained a major influencing factor in the process of choosing a specialty or  
16  
17 251 subspecialty. In the US, 15% of full-time family medicine physicians earned less than  
18  
19 252 \$100,000 in 2004, which is significantly less than the income earned by invasive  
20  
21 253 cardiologists (median income=\$427,815), neurosurgeons (median income=\$211,094),  
22  
23 254 and orthopedists (median income=\$335,646).<sup>27</sup> This economic inequality made family  
24  
25 255 medicine less attractive to medical school graduates.<sup>28</sup> Benefits such as health  
26  
27 256 insurance and tuition reimbursement have been shown to be the most common  
28  
29 257 economic incentives used to attract applicants.<sup>29</sup>

30  
31  
32  
33  
34  
35 258 The non-economic factors can be divided into individual factors, specialty-related  
36  
37 259 factors and others. First, individual factors, including academic interest and  
38  
39 260 competencies, have a considerable impact on students' subspecialty choice, with EOI  
40  
41 261 values of 75.29% and 55.15%, respectively. In addition, in the subgroup analysis,  
42  
43 262 although academic interests were less influential in developing countries than in  
44  
45 263 developed countries (79.66% [95% CI, 70.73%; 86.39% vs. 60.41% [95% CI, 43.44%;  
46  
47 264 75.19%];  $Q=3.51$   $P=0.02$ ), they were still the most influential of the 12 factors  
48  
49 265 regardless of regional economic level. These findings indicate that subspecialties with  
50  
51 266 a shortage of manpower may attract more students by increasing students' interests and  
52  
53  
54  
55  
56

1  
2  
3  
4  
5 267 improving the quality of education. Previous studies indicated that early specialty  
6  
7 268 exposure in medical education may arouse students' academic interest and improve  
8  
9 269 their clinical competence.<sup>28 30</sup> For example, an elective extracurricular program  
10  
11 270 designed to facilitate early contact with family medicine physicians was found to  
12  
13 271 significantly improve students' interest and clinical skills, especially communication  
14  
15 272 skills, in family medicine.<sup>31</sup> Furthermore, dispelling myths and espousing the positive  
16  
17 273 aspects of a discipline may provide a better understanding of certain specialties; this  
18  
19 274 approach could also be effective in increasing students' academic interest.<sup>32</sup> For  
20  
21 275 instance, family medicine is often considered a discipline that requires less professional  
22  
23 276 skills and knowledge. This misconception demotivates students from choosing family  
24  
25 277 medicine as their future career specialty, and this trend may eventually lead to a  
26  
27 278 shortage of family physicians.<sup>32</sup> Eliminating such prejudices may help students pay  
28  
29 279 greater attention to the areas in short supply and restore their interests in other  
30  
31 280 specialties.

32  
33  
34  
35  
36  
37  
38 281 Second, the specialty-related factors included controllable lifestyle/flexible work  
39  
40 282 schedule (EOI of 53.00%), career opportunities (EOI of 44.00%), workload (EOI of  
41  
42 283 37.99%) and training length (EOI of 32.30%). Of these factors, lifestyle varied between  
43  
44 284 different areas. Additionally, although certain specialties, such as general surgery,  
45  
46 285 seem to have an adequate number of surgeons on a per capita basis in the US, there is  
47  
48 286 still a poor geographic distribution within the surgical workforce according to the type  
49  
50 287 of surgical practice.<sup>33</sup> The inflexible lifestyle is a common reason that students perceive  
51  
52 288 surgery to be less attractive.<sup>33</sup> Reorganization of expected work hours within shared  
53  
54  
55  
56

1  
2  
3  
4  
5 289 practices and the increased use of physician extenders and technologies such as  
6  
7 290 electronic medical records may give physicians more flexibility in work schedules.<sup>34</sup>  
8  
9 291 Moreover, providing promotion opportunities and shortening the length of training are  
10  
11 292 possible strategies to recruit new staff in subspecialties that require a long period of  
12  
13 293 post-graduate residency training, such as neurosurgery.<sup>35</sup>  
14  
15  
16

17 294 Finally, other factors such as service orientation (EOI of 50.74%), medical teachers or  
18  
19 295 mentors (EOI of 46.93%), prestige (EOI of 34.68%), and advice from others (EOI of  
20  
21 296 28.24%) also contribute to the decision-making process of medical students. For  
22  
23 297 example, the desire to care for patients with end-stage diseases contributed to the  
24  
25 298 decision to enter palliative medicine in 86% of the medical students.<sup>7</sup> Additionally,  
26  
27 299 exposure to mentors in a particular clinical field such as internal medicine has been  
28  
29 300 strongly associated with medical students' choice of clinical field.<sup>36</sup> Moreover,  
30  
31 301 improving the occupational prestige of areas such as family medicine, pathology, and  
32  
33 302 radiology may help reshape the distribution of the workforce.<sup>30 37 38</sup>  
34  
35  
36  
37

38 303 In our study, several findings are especially noteworthy. First, interest was far more  
39  
40 304 important than income in deciding subspecialty. In our study, interest was the top-  
41  
42 305 ranked influencing factor (EOI of 75.29%) of subspecialty choice, while income was  
43  
44 306 ranked lower (EOI of 34.70%). This finding argues against the possible default belief  
45  
46 307 that raising physician's wages alone could solve the uneven distribution of clinicians  
47  
48 308 among subspecialties. Our findings highlight that cultivating and stimulating students'  
49  
50 309 professional interests may help improve the maldistribution of medical resources in a  
51  
52 310 more efficient and cost-saving manner.  
53  
54  
55  
56



1  
2  
3  
4  
5 311 Second, improving abilities in a certain subspecialty of interest can greatly affect  
6  
7 312 medical students' professional choice. In our study, competencies ranked second in  
8  
9 313 influence, which may reflect the impact of admission conditions on students' choice of  
10  
11 314 subspecialty. Hence, to reduce the risk that students are restricted to the subspecialty  
12  
13  
14 315 of their interest due to a lack of personal skills, medical education should focus more  
15  
16 316 on enhancing students' personal competencies in addition to their academic interests.

17  
18  
19 317 Third, balancing medical resources is a complex process in practical terms, as the  
20  
21 318 influencing factors are not mutually exclusive. The shortage of physicians in certain  
22  
23 319 subspecialties may increase physician workload, resulting in less time for teaching.  
24  
25  
26 320 Hence, the quality of teaching cannot be guaranteed, and students may tend to avoid  
27  
28 321 choosing these subspecialties, thus worsening the imbalance in the medical workforce.  
29  
30  
31 322 Additionally, some of the 12 factors identified are not amenable to practical  
32  
33 323 interventions. For example, prestige cannot be immediately increased using  
34  
35 324 interventional strategies.<sup>37</sup> Overall, effective strategies must be multi-pronged and  
36  
37 325 incorporate several different aspects, and maldistribution in the workforce should not  
38  
39 326 be tackled through a simple adjustment of one influencing factor.

### 40 41 42 43 327 **Interpretations of the results of this meta-analysis**

44  
45  
46 328 Our meta-regression stratified by the study-level characteristics found that country,  
47  
48 329 survey years, subspecialty and sample size may contribute to the heterogeneity  
49  
50 330 between studies. There was no significant difference in the sensitivity analysis, which  
51  
52 331 indicated that the results of the meta-analysis were convincing. The funnel plots and  
53  
54  
55 332 Egger's tests revealed that most of the publication bias was small ( $P>0.05$ ), except for

1  
2  
3  
4  
5 333 the meta-analysis of “patient service orientation”. Moreover, the majority of the studies  
6  
7 334 collected in the database were from developed countries rather than developing  
8  
9 335 countries.

### 12 336 **Limitations**

15 337 Several limitations should be considered when interpreting the findings of this study.  
17  
18 338 First, the students involved in our study included medical students at different stages  
19  
20 339 of their medical education. Students’ perception about different subspecialties may  
21  
22 340 change during medical training until the students applies for specialty training. For  
23  
24  
25 341 example, compared to an intern, a freshman student may place greater emphasis on  
26  
27 342 income and prestige when considering a career choice.<sup>39</sup> A subgroup analysis stratified  
28  
29 343 by the stages of medical education and a secondary meta-analysis of longitudinal  
30  
31 344 studies may better reflect changes in influencing factors and the extent of their  
32  
33 345 influence over time. Second, our meta-analysis summarized the data from different  
34  
35 346 geographic regions around the world, and the general conclusions may not be  
36  
37 347 appropriate to guide policy development in each region. Enhanced effort is needed to  
38  
39 348 develop specific intervention strategies according to the specific economic level,  
40  
41 349 religious beliefs, healthcare system, educational system and endemic diseases of  
42  
43 350 different countries and regions. Subgroup analysis stratified by organizational and  
44  
45 351 medical training factors would provide more information of the factors influencing  
46  
47 352 subspecialty choice among medical students. Third, the surveys in the various studies  
48  
49 353 were also conducted using different methods. Most of the questionnaires used a Likert  
50  
51 354 scale. Therefore, when we converted the results to a percentage representing the extent  
52  
53  
54  
55  
56

1  
2  
3  
4  
5 355 of a factor's influence, the Likert scale items were treated as interval data.<sup>40-42</sup>  
6  
7 356 Consequently, there may have been differences in the conversion process. Finally, the  
8  
9 357 analysis relied on aggregated published data. A multicenter prospective study would  
10  
11 358 provide more accurate estimate of the influencing factors and the extent of their  
12  
13  
14 359 influence on medical students' choice of subspecialty.  
15  
16

## 17 360 **Conclusion**

18  
19  
20 361 In conclusion, this systematic review and meta-analysis provided a summary  
21  
22 362 evaluation of 12 influencing factors and the extent of their influence on the choice of  
23  
24 363 subspecialty training among medical students. Understanding students' attitudes  
25  
26  
27 364 toward their subspecialty decision-making process could provide the basis for  
28  
29 365 developing strategies to increase the attractiveness of subspecialties experiencing a  
30  
31 366 shortage of manpower, thereby balancing the distribution of medical recourses.  
32  
33  
34  
35  
36  
37  
38  
39  
40  
41  
42  
43  
44  
45  
46  
47  
48  
49  
50  
51  
52  
53  
54  
55  
56  
57  
58  
59  
60

1  
2  
3  
4  
5 367 **Contributors:** Haotian Lin contributed to the conceptualizing and design of the study,  
6  
7 368 and to research funding, coordinated the research and oversaw the project. Yahan Yang,  
8  
9 369 Jiawei Li and Xiaohang Wu contributed to data collection and interpretation, and to  
10  
11 370 data analysis. Jinghui Wang, Yi Zhu, Chuan Chen and Wangting Li contributed to the  
12  
13 371 design of the study. All authors contributed to the drafting and revision of the paper  
14  
15 372 and approved the final manuscript for publication. No patients or the public were  
16  
17 373 involved in the development and design of this research.  
18  
19  
20

21 374 **Funding:** The principal investigator of this study (Haotian Lin) is currently supported  
22  
23 375 by National key R & D project (2018YFC010302), the Key Research Plan for the  
24  
25 376 National Natural Science Foundation of China Cultivation Project (91546101), the  
26  
27 377 National Natural Science Foundation of China (81770967), the Fundamental Research  
28  
29 378 Funds for the Central Universities (16ykjc28), the Guangdong Provincial Natural  
30  
31 379 Science Foundation for Distinguished Young Scholars of China (2014A030306030),  
32  
33 380 the Guangdong Province Universities and Colleges Youth Pearl River Scholar Funded  
34  
35 381 Scheme (2016), the Clinical Research and Translational Medical Center of Pediatric  
36  
37 382 Cataract in Guangzhou City (201505032017516), and Ministry of Science and  
38  
39 383 Technology of China Grants (2015CB964600). These sponsors and funding  
40  
41 384 organizations had no role in the design or performance of this study.  
42  
43  
44  
45  
46  
47

48 385 **Competing Interests:** The authors declare no competing financial interests.  
49  
50

51 386 **Data sharing:** Extracted data are available upon request to the corresponding author.  
52  
53  
54  
55  
56  
57  
58  
59  
60

388 **References**

- 389 1. Zurn P, Dal Poz MR, Stilwell B, et al. Imbalance in the health workforce. *Hum Resour Health*  
390 2004;2(1):13. doi: 10.1186/1478-4491-2-13
- 391 2. Diallo K, Zurn P, Gupta N, et al. Monitoring and evaluation of human resources for health: an  
392 international perspective. *Hum Resour Health* 2003;1(1):3. doi: 10.1186/1478-4491-1-3
- 393 3. Anderson GF, Hussey PS. Population aging: A comparison among industrialized countries. *Health*  
394 *Affair* 2000;19(3):191-203. doi: DOI 10.1377/hlthaff.19.3.191
- 395 4. Hobbs FDR, Bankhead C, Mukhtar T, et al. Clinical workload in UK primary care: a retrospective  
396 analysis of 100 million consultations in England, 2007-14. *Lancet* 2016;387(10035):2323-30.  
397 doi: 10.1016/S0140-6736(16)00620-6
- 398 5. Reeve J, Blakeman T, Freeman GK, et al. Generalist solutions to complex problems: generating  
399 practice-based evidence - the example of managing multi-morbidity. *Bmc Fam Pract* 2013;14  
400 doi: Artn 112  
401 10.1186/1471-2296-14-112
- 402 6. Bodenheimer T. Primary care--will it survive? *N Engl J Med* 2006;355(9):861-4. doi:  
403 10.1056/NEJMp068155
- 404 7. LeGrand SB, Heintz JB. Palliative Medicine Fellowship: A Study of Resident Choices. *Journal of*  
405 *Pain and Symptom Management* 2012;43(3):558-68. doi: 10.1016/j.jpainsymman.2011.04.018
- 406 8. Kim YY, Kim UN, Kim YS, et al. Factors associated with the specialty choice of Korean medical  
407 students: a cross-sectional survey. *Human Resources for Health* 2016;14:8. doi:  
408 10.1186/s12960-016-0141-8
- 409 9. McNally SA. Competition ratios for different specialties and the effect of gender and immigration  
410 status. *J R Soc Med* 2008;101(10):489-92. doi: 10.1258/jrsm.2008.070284
- 411 10. Reed VA, Jernstedt GC, Reber ES. Understanding and improving medical student specialty choice:  
412 a synthesis of the literature using decision theory as a referent. *Teach Learn Med*  
413 2001;13(2):117-29. doi: 10.1207/S15328015TLM1302\_7
- 414 11. Al-Ansari SS, Khafagy MA. FACTORS AFFECTING THE CHOICE OF HEALTH SPECIALTY  
415 BY MEDICAL GRADUATES. *Journal of Family & Community Medicine* 2015;13(3):119-  
416 23.
- 417 12. Leduc N, Vanasse A, Scott I, et al. The career decision-making process of medical students and  
418 residents and the choice of specialty and practice location: how does Postgraduate Medical  
419 Education fit in? 2011
- 420 13. Delamothe T. Modernising Medical Careers: final report. *BMJ* 2008;336(7635):54-55.
- 421 14. Goldacre MJ, Laxton L, Harrison EM, et al. Early career choices and successful career progression  
422 in surgery in the UK: prospective cohort studies. *Bmc Surgery* 2010;10:11. doi: 10.1186/1471-  
423 2482-10-32

- 1  
2  
3  
4  
5 424 15. Weissman C, Zisk-Rony RY, Schroeder JE, et al. Medical specialty considerations by medical  
6 425 students early in their clinical experience. *Isr J Health Policy Res* 2012;1(1):13. doi:  
7 426 10.1186/2045-4015-1-13
- 8  
9 427 16. Jackson C, Ball J, Hirsh W, et al. Informing choices: the need for career advice in medical training.  
10 428 *Cambridge: National institute for careers Education and Counseling* 2003
- 11  
12 429 17. Moher D, Liberati A, Tetzlaff J, et al. Preferred reporting items for systematic reviews and meta-  
13 430 analyses: the PRISMA statement. *J Clin Epidemiol* 2009;62(10):1006-12. doi:  
14 431 10.1016/j.jclinepi.2009.06.005
- 15  
16 432 18. Rostom A, Dube C, Cranney A, et al. Celiac disease. *Evid Rep Technol Assess (Summ)* 2004(104):1-  
17 433 6. [published Online First: 2004/09/07]
- 18  
19 434 19. Borenstein M, Hedges LV, Higgins JP, et al. A basic introduction to fixed-effect and random-effects  
20 435 models for meta-analysis. *Res Synth Methods* 2010;1(2):97-111. doi: 10.1002/jrsm.12
- 21  
22 436 20. Higgins JP, Thompson SG, Deeks JJ, et al. Measuring inconsistency in meta-analyses. *BMJ*  
23 437 2003;327(7414):557-60. doi: 10.1136/bmj.327.7414.557
- 24  
25 438 21. Higgins JP, Thompson SG. Quantifying heterogeneity in a meta-analysis. *Stat Med*  
26 439 2002;21(11):1539-58. doi: 10.1002/sim.1186
- 27  
28 440 22. Sterne JA, Juni P, Schulz KF, et al. Statistical methods for assessing the influence of study  
29 441 characteristics on treatment effects in 'meta-epidemiological' research. *Stat Med*  
30 442 2002;21(11):1513-24. doi: 10.1002/sim.1184
- 31  
32 443 23. Borenstein M, Hedges LV, Higgins J, et al. Criticisms of meta - analysis. *Introduction to meta-*  
33 444 *analysis* 2009:377-87.
- 34  
35 445 24. Egger M, Davey Smith G, Schneider M, et al. Bias in meta-analysis detected by a simple, graphical  
36 446 test. *BMJ* 1997;315(7109):629-34.
- 37  
38 447 25. Sterne JA, Egger M. Funnel plots for detecting bias in meta-analysis: guidelines on choice of axis.  
39 448 *J Clin Epidemiol* 2001;54(10):1046-55.
- 40  
41 449 26. Duval S, Tweedie R. Trim and fill: A simple funnel-plot-based method of testing and adjusting for  
42 450 publication bias in meta-analysis. *Biometrics* 2000;56(2):455-63. [published Online First:  
43 451 2000/07/06]
- 44  
45 452 27. Bodenheimer T, Berenson RA, Rudolf P. The primary care-specialty income gap: why it matters.  
46 453 *Annals of internal medicine* 2007;146(4):301-6.
- 47  
48 454 28. Bodenheimer T, Pham HH. Primary care: current problems and proposed solutions. *Health Aff*  
49 455 *(Millwood)* 2010;29(5):799-805. doi: 10.1377/hlthaff.2010.0026
- 50  
51 456 29. Association AH. The hospital workforce shortage: Immediate and future. *Trend Watch* 2001;3(2):1-  
52 457 8.
- 53  
54 458 30. Compton MT, Frank E, Elon L, et al. Changes in US medical students' specialty interests over the  
55 459 course of medical school. *Journal of General Internal Medicine* 2008;23(7):1095-100. doi:

- 1  
2  
3  
4  
5 460 10.1007/s11606-008-0579-z  
6  
7 461 31. Indyk D, Deen D, Fornari A, et al. The influence of longitudinal mentoring on medical student  
8 462 selection of primary care residencies. *BMC medical education* 2011;11(1):27.  
9  
10 463 32. Gill H, McLeod S, Duerksen K, et al. Factors influencing medical students' choice of family  
11 464 medicine Effects of rural versus urban background. *Canadian Family Physician*  
12 465 2012;58(11):E649-E57.  
13  
14 466 33. Richardson JD. Workforce and lifestyle issues in general surgery training and practice. *Archives of*  
15 467 *surgery (Chicago, Ill : 1960)* 2002;137(5):515-20.  
16  
17 468 34. Newton DA, Grayson MS, Thompson LF. The variable influence of lifestyle and income on medical  
18 469 students' career specialty choices: data from two U.S. medical schools, 1998-2004. *Academic*  
19 470 *medicine : journal of the Association of American Medical Colleges* 2005;80(9):809-14.  
20  
21 471 35. Orrico K. Ensuring an adequate neurosurgical workforce for 21st century. *Surgeons AAoN* 2012  
22  
23 472 36. Wright SM, Wong A, Newill CA. The impact of role models on medical students. *Journal of General*  
24 473 *Internal Medicine* 1997;12(1):53-56.  
25  
26 474 37. Glazer GM, Ruiz-Wibbelsmann JA. Decades of perceived mediocrity: prestige and radiology.  
27 475 *Radiology* 2011;260(2):311-16.  
28  
29 476 38. Schwartzbaum AM, McGrath JH, Rothman RA. The perception of prestige differences among  
30 477 medical subspecialties. *Soc Sci Med* 1973;7(5):365-71.  
31  
32 478 39. Parsa S, Aghazadeh A, Nejatiasafa AA, et al. Freshmen versus Interns' Specialty Interests. *Archives*  
33 479 *of Iranian Medicine* 2010;13(6):509-15.  
34  
35 480 40. Komorita SS. Attitude Content, Intensity, and the Neutral Point on a Likert Scale. *J Soc Psychol*  
36 481 1963;61:327-34. doi: 10.1080/00224545.1963.9919489  
37  
38 482 41. Baggaley AR, Hull AL. The effect of nonlinear transformations on a Likert scale. *Eval Health Prof*  
39 483 1983;6(4):483-91.  
40  
41 484 42. Norman G. Likert scales, levels of measurement and the "laws" of statistics. *Advances in health*  
42 485 *sciences education : theory and practice* 2010;15(5):625-32. doi: 10.1007/s10459-010-9222-y  
43  
44 486 43. Smith F, Lambert TW, Goldacre MJ. Factors influencing junior doctors' choices of future specialty:  
45 487 trends over time and demographics based on results from UK national surveys. *Journal of the*  
46 488 *Royal Society of Medicine* 2015;108(10):396-405. doi: 10.1177/0141076815599674  
47  
48 489 44. Cochran A, Melby S, Neumayer LA. An Internet-based survey of factors influencing medical student  
49 490 selection of a general surgery career. *American Journal of Surgery* 2005;189(6):742-46. doi:  
50 491 10.1016/j.amjsurg.2005.03.019  
51  
52 492 45. Hauer KE, Durning SJ, Kernan WN, et al. Factors associated with medical students' career choices  
53 493 regarding internal medicine. *Jama-Journal of the American Medical Association*  
54 494 2008;300(10):1154-64. doi: 10.1001/jama.300.10.1154  
55  
56  
57  
58  
59  
60

- 1  
2  
3  
4  
5 495 46. Johnson AL, Sharma J, Chinchilli VM, et al. Why do medical students choose orthopaedics as a  
6 496 career? *The Journal of bone and joint surgery American volume* 2012;94(11):e78. doi:  
7 497 10.2106/jbjs.k.00826 [published Online First: 2012/05/29]
- 8  
9 498 47. Kiolbassa K, Miksch A, Hermann K, et al. Becoming a general practitioner - Which factors have  
10 499 most impact on career choice of medical students? *Bmc Family Practice* 2011;12:7. doi:  
11 500 10.1186/1471-2296-12-25
- 12  
13 501 48. Klingensmith ME, Cogbill TH, Luchette F, et al. Factors Influencing the Decision of Surgery  
14 502 Residency Graduates to Pursue General Surgery Practice Versus Fellowship. *Annals of Surgery*  
15 503 2015;262(3):449-55. doi: 10.1097/sla.0000000000001435
- 16  
17 504 49. Lee JY, Kerbl DC, McDougall EM, et al. Medical Students Pursuing Surgical Fields Have No  
18 505 Greater Innate Motor Dexterity than Those Pursuing Nonsurgical Fields. *Journal of Surgical*  
19 506 *Education* 2012;69(3):360-63. doi: 10.1016/j.jsurg.2011.11.005
- 20  
21 507 50. Macdonald C, Cawood T. Factors influencing career decisions in internal medicine. *Internal*  
22 508 *Medicine Journal* 2012;42(8):918-23. doi: 10.1111/j.1445-5994.2012.02793.x
- 23  
24 509 51. Paiva RE, Vu NV, Verhulst SJ. The effect of clinical experiences in medical school on specialty  
25 510 choice decisions. *J Med Educ* 1982;57(9):666-74.
- 26  
27 511 52. Ni Chroinin D, Cronin E, Cullen W, et al. Would you be a geriatrician? Student career preferences  
28 512 and attitudes to a career in geriatric medicine. *Age Ageing* 2013;42(5):654-7. doi:  
29 513 10.1093/ageing/aft093 [published Online First: 2013/08/07]
- 30  
31 514 53. Rogers LQ, Fincher RM, Lewis LA. Factors influencing medical students to choose primary care or  
32 515 non-primary care specialties. *Academic medicine : journal of the Association of American*  
33 516 *Medical Colleges* 1990;65(9 Suppl):S47-8.
- 34  
35 517 54. Abendroth J, Schnell U, Lichte T, et al. Motives of former interns in general practice for speciality-  
36 518 choice--results of a cross-sectional study among graduates 2007 to 2012. *GMS Zeitschrift fur*  
37 519 *medizinische Ausbildung* 2014;31(1):Doc11. doi: 10.3205/zma000903 [published Online First:  
38 520 2014/02/28]
- 39  
40  
41 521 55. Alawad A, Khan WS, Abdelrazig YM, et al. Factors considered by undergraduate medical students  
42 522 when selecting specialty of their future careers. *Pan African Medical Journal* 2015;20:6. doi:  
43 523 10.11604/pamj.2015.20.102.4715
- 44  
45 524 56. Azizzadeh A, McCollum CH, Miller CC, 3rd, et al. Factors influencing career choice among medical  
46 525 students interested in surgery. *Curr Surg* 2003;60(2):210-3. doi: 10.1016/s0149-  
47 526 7944(02)00679-7 [published Online First: 2004/02/20]
- 48  
49 527 57. Celenza A, Bharath J, Scop J. Improving the attractiveness of an emergency medicine career to  
50 528 medical students: An exploratory study. *Emergency Medicine Australasia* 2012;24(6):625-33.  
51 529 doi: 10.1111/j.1742-6723.2012.01607.x
- 52  
53 530 58. Dolan-Evans E, Rogers GD. Barriers for students pursuing a surgical career and where the Surgical  
54 531 Interest Association can intervene. *Anz Journal of Surgery* 2014;84(6):406-11. doi:  
55 532 10.1111/ans.12521



- 1  
2  
3  
4  
5 533 59. Boyd JS, Clyne B, Reinert SE, et al. Emergency Medicine Career Choice: A Profile of Factors and  
6 534 Influences from the Association of American Medical Colleges (AAMC) Graduation  
7 535 Questionnaires. *Academic Emergency Medicine* 2009;16(6):544-49. doi: 10.1111/j.1553-  
8 536 2712.2009.00385.x
- 9  
10 537 60. Egerton EA. Choice of career of doctors who graduated from Queen's University, Belfast in 1977.  
11 538 *Med Educ* 1985;19(2):131-7.
- 12  
13 539 61. Diderichsen S, Johansson EE, Verdonk P, et al. Few gender differences in specialty preferences and  
14 540 motivational factors: a cross-sectional Swedish study on last-year medical students. *Bmc*  
15 541 *Medical Education* 2013;13:8. doi: 10.1186/1472-6920-13-39
- 16  
17 542 62. Ferrari S, Reggianini C, Mattei G, et al. International Study of Student Career Choice in Psychiatry  
18 543 (ISoSCCiP): Results from Modena, Italy. *International Review of Psychiatry* 2013;25(4):450-  
19 544 59. doi: 10.3109/09540261.2013.804402
- 20  
21 545 63. Freire MDM, Jordao LMR, Ferreira ND, et al. Motivation Towards Career Choice of Brazilian  
22 546 Freshman Students in a Fifteen-Year Period. *Journal of Dental Education* 2011;75(1):115-21.
- 23  
24 547 64. Buddeberg-Fischer B, Klaghofer R, Abel T, et al. Swiss residents' speciality choices--impact of  
25 548 gender, personality traits, career motivation and life goals. *BMC Health Serv Res* 2006;6:137.  
26 549 doi: 10.1186/1472-6963-6-137
- 27  
28 550 65. Dorsey ER, Jarjoura D, Rutecki GW. The influence of controllable lifestyle and sex on the specialty  
29 551 choices of graduating U.S. medical students, 1996-2003. *Academic medicine : journal of the*  
30 552 *Association of American Medical Colleges* 2005;80(9):791-6. [published Online First:  
31 553 2005/08/27]
- 32  
33 554 66. Ekenze SO, Ugwumba FO, Obi UM, et al. Undergraduate Surgery Clerkship and the Choice of  
34 555 Surgery as a Career: Perspective from a Developing Country. *World Journal of Surgery*  
35 556 2013;37(9):2094-100. doi: 10.1007/s00268-013-2073-y
- 36  
37  
38 557 67. Barikani A, Afaghi M, Barikani F, et al. Perception of the medical students on their future career in  
39 558 Qazvin University of Medical Sciences. *Global journal of health science* 2012;4(4):176-80.  
40 559 doi: 10.5539/gjhs.v4n4p176 [published Online First: 2012/09/18]
- 41  
42 560 68. Bittaye M, Odukogbe AT, Nyan O, et al. Medical students' choices of specialty in The Gambia: the  
43 561 need for career counseling. *BMC Med Educ* 2012;12:72. doi: 10.1186/1472-6920-12-72
- 44  
45 562 69. Bonura EM, Lee ES, Ramsey K, et al. Factors Influencing Internal Medicine Resident Choice of  
46 563 Infectious Diseases or Other Specialties: A National Cross-sectional Study. *Clinical Infectious*  
47 564 *Diseases* 2016;63(2):155-63. doi: 10.1093/cid/ciw263
- 48  
49 565 70. Al-Fouzani R, Al-Ajlan S, Marwan Y, et al. Factors affecting future specialty choice among medical  
50 566 students in Kuwait. *Medical Education Online* 2012;17:7. doi: 10.3402/meo.v17i0.19587
- 51  
52 567 71. AlKot MM, Gouda MA, KhalafAllah MT, et al. Family Medicine in Egypt From Medical Students'  
53 568 Perspective: A Nationwide Survey. *Teaching and Learning in Medicine* 2015;27(3):264-73.  
54 569 doi: 10.1080/10401334.2015.1044654

- 1  
2  
3  
4  
5 570 72. Borges NJ, Manuel RS, Duffy RD, et al. Influences on specialty choice for students entering person-  
6 571 oriented and technique-oriented specialties. *Medical Teacher* 2009;31(12):1086-88. doi:  
7 572 10.3109/01421590903183787
- 8  
9 573 73. Budd S, Kelley R, Day R, et al. Student attitudes to psychiatry and their clinical placements. *Medical*  
10 574 *Teacher* 2011;33(11):E586-E92. doi: 10.3109/0142159x.2011.610836
- 11  
12 575 74. Corrigan MA, Shields CJ, Redmond HP. Factors influencing surgical career choices and  
13 576 advancement in Ireland and Britain. *World Journal of Surgery* 2007;31(10):1921-29. doi:  
14 577 10.1007/s00268-007-9175-3
- 15  
16 578 75. Davis CR, Trevatt AEJ, McGoldrick RB, et al. How to train plastic surgeons of the future. *Journal*  
17 579 *of Plastic Reconstructive and Aesthetic Surgery* 2016;69(8):1134-40. doi:  
18 580 10.1016/j.bjps.2016.05.001
- 19  
20 581 76. Deutsch T, Lippmann S, Frese T, et al. Who wants to become a general practitioner? Student and  
21 582 curriculum factors associated with choosing a GP career - a multivariable analysis with  
22 583 particular consideration of practice-orientated GP courses. *Scandinavian Journal of Primary*  
23 584 *Health Care* 2015;33(1):47-53. doi: 10.3109/02813432.2015.1020661
- 24  
25 585 77. Gardner SP, Roberts-Thomson KF. The effect of a change in selection procedures on students'  
26 586 motivation to study dentistry. *Australian Dental Journal* 2014;59(1):2-8. doi:  
27 587 10.1111/adj.12141
- 28  
29 588 78. Dias MS, Sussman JS, Durham S, et al. Perceived benefits and barriers to a career in pediatric  
30 589 neurosurgery: a survey of neurosurgical residents Clinical article. *Journal of Neurosurgery-*  
31 590 *Pediatrics* 2013;12(5):422-33. doi: 10.3171/2013.5.peds12597
- 32  
33 591 79. Goltz CJ, Bachusz RC, Mancini E, et al. Medical Student Career Survey-Vascular Surgery  
34 592 Awareness Initiative. *Annals of Vascular Surgery* 2013;27(2):225-31. doi:  
35 593 10.1016/j.avsg.2012.02.012
- 36  
37 594 80. Gupta NB, Khadilkar SV, Bangar SS, et al. Neurology as career option among postgraduate medical  
38 595 students. *Annals of Indian Academy of Neurology* 2013;16(4):478-82. doi: 10.4103/0972-  
39 596 2327.120427
- 40  
41 597 81. Hanzlick R, Prahlow JA, Denton S, et al. Selecting forensic pathology as a career - A survey of the  
42 598 post with an eye on the future. *American Journal of Forensic Medicine and Pathology*  
43 599 2008;29(2):114-22. doi: 10.1097/PAF.0b013e318174f0a9
- 44  
45 600 82. Harris MC, Marx J, Gallagher PR, et al. General vs subspecialty pediatrics - Factors leading to  
46 601 residents' career decisions over a 12-year period. *Archives of Pediatrics & Adolescent Medicine*  
47 602 2005;159(3):212-16. doi: 10.1001/archpedi.159.3.212
- 48  
49 603 83. Hauer KE, Fagan MJ, Kernan W, et al. Internal medicine clerkship directors' perceptions about  
50 604 student interest in internal medicine careers. *Journal of General Internal Medicine*  
51 605 2008;23(7):1101-04. doi: 10.1007/s11606-008-0640-y
- 52  
53 606 84. Labiris G, Vamvakerou V, Tsolakaki O, et al. Perceptions of Greek medical students regarding  
54 607 medical profession and the specialty selection process during the economic crisis years. *Health*

- 1  
2  
3  
4  
5 608 *Policy* 2014;117(2):203-09. doi: 10.1016/j.healthpol.2014.04.009
- 6  
7 609 85. Lambert TW, Goldacre MJ, Bron AJ. Career choices for ophthalmology made by newly qualified  
8 610 doctors in the United Kingdom, 1974-2005. *Bmc Ophthalmology* 2008;8:9. doi: 10.1186/1471-  
9 611 2415-8-3
- 10  
11 612 86. Shah HH, Jhaveri KD, Sparks MA, et al. Career Choice Selection and Satisfaction among US Adult  
12 613 Nephrology Fellows. *Clinical Journal of the American Society of Nephrology* 2012;7(9):1513-  
13 614 20. doi: 10.2215/cjn.01620212
- 14  
15 615 87. Lefevre JH, Roupret M, Kerneis S, et al. Career choices of medical students: a national survey of  
16 616 1780 students. *Medical Education* 2010;44(6):603-12. doi: 10.1111/j.1365-2923.2010.03707.x
- 17  
18 617 88. Vicente B, Rosel L. Challenges for psychiatric recruitment and training in Chile. *International*  
19 618 *Review of Psychiatry* 2013;25(4):413-18. doi: 10.3109/09540261.2013.822348
- 20  
21 619 89. Wiesenfeld L, Abbey S, Takahashi SG, et al. Choosing Psychiatry as a Career: Motivators and  
22 620 Deterrents at a Critical Decision-Making Juncture. *Canadian Journal of Psychiatry-Revue*  
23 621 *Canadienne De Psychiatrie* 2014;59(8):450-54.
- 24  
25 622 90. Lam CYY, Cheung CSY, Hui ASY. Factors influencing the career interest of medical graduates in  
26 623 obstetrics and gynaecology in Hong Kong: a cross-sectional questionnaire survey. *Hong Kong*  
27 624 *Medical Journal* 2016;22(2):138-43.
- 28  
29 625 91. Hartung PJ, Taber BJ, Richard GV. The physician values in practice scale: Construction and initial  
30 626 validation. *Journal of Vocational Behavior* 2005;67(2):309-20. doi: 10.1016/j.jvb.2004.05.008
- 31  
32 627 92. Girasek E, Molnar R, Eke E, et al. The medical career choice motivations - Results from a Hungarian  
33 628 study. *Central European Journal of Medicine* 2011;6(4):502-09. doi: 10.2478/s11536-011-  
34 629 0034-0
- 35  
36 630 93. Zuccato JA, Kulkarni AV. The Impact of Early Medical School Surgical Exposure on Interest in  
37 631 Neurosurgery. *Canadian Journal of Neurological Sciences* 2016;43(3):410-16. doi:  
38 632 10.1017/cjn.2015.332
- 39  
40 633 94. Wilbanks L, Spollen J, Messias E. Factors Influencing Medical School Graduates Toward a Career  
41 634 in Psychiatry: Analysis from the 2011-2013 Association of American Medical Colleges  
42 635 Graduation Questionnaire. *Academic Psychiatry* 2016;40(2):255-60. doi: 10.1007/s40596-015-  
43 636 0287-z
- 44  
45 637 95. West CP, Drefahl MM, Popkave C, et al. Internal Medicine Resident Self-report of Factors  
46 638 Associated with Career Decisions. *Journal of General Internal Medicine* 2009;24(8):946-49.  
47 639 doi: 10.1007/s11606-009-1039-0
- 48  
49  
50 640 96. Watmough S, Taylor D, Ryland I. Using questionnaires to determine whether medical graduates'  
51 641 career choice is determined by undergraduate or postgraduate experiences. *Medical Teacher*  
52 642 2007;29(8):830-32. doi: 10.1080/01421590701551755
- 53  
54 643 97. Thakur A, Fedorka P, Ko C, et al. Impact of mentor guidance in surgical career selection. *Journal*  
55 644 *of Pediatric Surgery* 2001;36(12):1802-04. doi: 10.1053/jpsu.2001.28842

- 1  
2  
3  
4  
5 645 98. Scott I, Gowans M, Wright B, et al. Determinants of choosing a career in surgery. *Medical Teacher*  
6 646 2011;33(12):1011-17. doi: 10.3109/0142159x.2011.558533
- 7  
8 647 99. Schnuth RL, Vasilenko P, Mavis B, et al. What influences medical students to pursue careers in  
9 648 obstetrics and gynecology? *American Journal of Obstetrics and Gynecology* 2003;189(3):639-  
10 649 43. doi: 10.1067/s0002-9378(03)00886-x
- 11  
12 650 100. Richards JMJ, Drummond R, Murray J, et al. WHAT PROPORTION OF BASIC SURGICAL  
13 651 TRAINEES CONTINUE IN A SURGICAL CAREER? A SURVEY OF THE FACTORS  
14 652 WHICH ARE IMPORTANT IN INFLUENCING CAREER DECISIONS. *Surgeon-Journal of*  
15 653 *the Royal Colleges of Surgeons of Edinburgh and Ireland* 2009;7(5):270-75.
- 16  
17 654 101. Reed CE, Vaporciyan AA, Erikson C, et al. Factors Dominating Choice of Surgical Specialty.  
18 655 *Journal of the American College of Surgeons* 2010;210(3):319-24. doi:  
19 656 10.1016/j.jamcollsurg.2009.11.016
- 20  
21 657 102. de Souza LCL, Mendonca VRR, Garcia GBC, et al. Medical Specialty Choice and Related Factors  
22 658 of Brazilian Medical Students and Recent Doctors. *Plos One* 2015;10(7):15. doi:  
23 659 10.1371/journal.pone.0133585
- 24  
25 660 103. Pikoulis E, Avgerinos ED, Pedeli X, et al. Medical students' perceptions on factors influencing a  
26 661 surgical career: The fate of general surgery in Greece. *Surgery* 2010;148(3):510-15. doi:  
27 662 10.1016/j.surg.2010.01.013
- 28  
29 663 104. Ozer U, Ceri V, Carpar E, et al. Factors Affecting the Choice of Psychiatry as a Specialty and  
30 664 Satisfaction among Turkish Psychiatry Residents. *Academic Psychiatry* 2016;40(2):299-303.  
31 665 doi: 10.1007/s40596-015-0346-5
- 32  
33 666 105. Noble J, Hechter FJ, Karaiskos N, et al. Motivational factors and future life plans of orthodontic  
34 667 residents in the United States. *American Journal of Orthodontics and Dentofacial Orthopedics*  
35 668 2010;137(5):623-30. doi: 10.1016/j.ajodo.2008.03.034
- 36  
37 669 106. Noble J. Factors influencing career choice in ophthalmology. *Canadian Journal of Ophthalmology-*  
38 670 *Journal Canadien D Ophthalmologie* 2006;41(5):596-99.
- 39  
40  
41 671 107. Newton DA, Grayson MS, Thompson LF. The variable influence of lifestyle and income on  
42 672 medical students' career specialty choices: Data from two US medical schools, 1998-2004.  
43 673 *Academic Medicine* 2005;80(9):809-14. doi: 10.1097/00001888-200509000-00005
- 44  
45 674 108. Moore HB, Moore PK, Grant AR, et al. Future of acute care surgery: A perspective from the next  
46 675 generation. *Journal of Trauma and Acute Care Surgery* 2012;72(1):94-99. doi:  
47 676 10.1097/TA.0b013e31823b990a
- 48  
49 677 109. Momen AA, Shakurnia A. Factors Influencing Pediatric Specialty Choice among Pediatric  
50 678 Residents of Ahvaz Jundishapur University of Medical Sciences. *International Journal of*  
51 679 *Pediatrics-Mashhad* 2015;3(3):701-06.
- 52  
53 680 110. Mehmood SI, Kumar A, Al-Binali A, et al. Specialty preferences: Trends and perceptions among  
54 681 Saudi undergraduate medical students. *Medical Teacher* 2012;34:S51-S60. doi:  
55 682 10.3109/0142159x.2012.656753

- 1  
2  
3  
4  
5 683 111. Lorient Y, Albiges-Sauvin L, Dionysopoulos D, et al. Why do residents choose the medical oncology  
6 684 specialty? Implications for future recruitment-results of the 2007 French Association of  
7 685 Residents in Oncology (AERIO) Survey. *Annals of Oncology* 2010;21(1):161-65. doi:  
8 686 10.1093/annonc/mdp294
- 9  
10 687 112. Lefevre JH, Karila L, Kerneis S, et al. Motivation of French medical students to pursue surgical  
11 688 careers: Results of national survey of 1742 students. *Journal of Visceral Surgery*  
12 689 2010;147(3):E181-E86. doi: 10.1016/j.jviscsurg.2010.08.004
- 13  
14 690 113. Vo A, McLean L, McInnes MDF. Medical specialty preferences in early medical school training  
15 691 in Canada. *Int J Med Educ* 2017;8:400-07. doi: 10.5116/ijme.59f4.3c15
- 16  
17 692 114. Grasreiner D, Dahmen U, Settmacher U. Specialty preferences and influencing factors: a repeated  
18 693 cross-sectional survey of first- to sixth-year medical students in Jena, Germany. *BMC medical*  
19 694 *education* 2018;18 doi: ARTN 103  
20  
21 695 10.1186/s12909-018-1200-8  
22
- 23 696 115. Alkhaneen H, Alhusain F, Alshahri K, et al. Factors influencing medical students' choice of  
24 697 emergency medicine as a career specialty-a descriptive study of Saudi medical students.  
25 698 *International journal of emergency medicine* 2018;11(1):14. doi: 10.1186/s12245-018-0174-y  
26 699 [published Online First: 2018/03/09]  
27  
28 700  
29  
30  
31  
32  
33  
34  
35  
36  
37  
38  
39  
40  
41  
42  
43  
44  
45  
46  
47  
48  
49  
50  
51  
52  
53  
54  
55  
56  
57  
58  
59  
60

1  
2  
3  
4  
5 701 **Legends**  
6  
7

8 702 **Table 1. Selected Characteristics of the 75 Studies Included in this Systematic**  
9  
10 703 **Review and Meta-analysis**  
11  
12

13 704 **Table 2. Meta-analyses of the Factors Influencing Medical Students' Choice of**  
14  
15 705 **Subspecialty**  
16  
17

18 706 **Table 3. Meta-regression of the EOI Value Stratified by Study-level**  
19  
20 707 **Characteristics**  
21  
22

23  
24 708 **Figure 1. Bar Graph of the Meta-analyses of the Factors Influencing Medical**  
25  
26 709 **Students' Choice of Subspecialty Stratified by Region.**  
27  
28

29 710 **Figure 2. Bar Graph of the Meta-analyses of the Factors Influencing Medical**  
30  
31 711 **Students' Choice of Subspecialty Stratified by Survey Year.**  
32  
33

34  
35 712 **Supplements**  
36  
37

38 713 **Methods S1. Search strategy used in the current systematic review and meta-**  
39  
40 714 **analysis.**  
41  
42

43 715 **Table S1. Quality Assessment of the Included Studies.**  
44  
45

46 716 **Table S2. Meta-analyses of the Factors Influencing Medical Students' Choice of**  
47  
48 717 **Subspecialty Stratified by Region and Survey Year.**  
49  
50

51  
52 718 **Figure S1. Flow Diagram of the Study Inclusion Process.**  
53  
54

55 719 **Figure S2. Forest Plot of "Academic Interest".**  
56  
57

- 1  
2  
3  
4  
5 720 **Figure S3. Forest Plot of “Competencies”.**  
6  
7  
8 721 **Figure S4. Forest Plot of “Controllable Lifestyle or Flexible Work Schedule”.**  
9  
10  
11 722 **Figure S5. Forest Plot of “Patient Service Orientation”.**  
12  
13  
14 723 **Figure S6. Forest Plot of “Medical Teachers or Mentors”.**  
15  
16  
17 724 **Figure S7. Forest Plot of “Career Opportunities”.**  
18  
19  
20 725 **Figure S8. Forest Plot of “Workload or Working Hours”.**  
21  
22  
23 726 **Figure S9. Forest Plot of “Income”.**  
24  
25  
26 727 **Figure S10. Forest Plot of “Length of Training”.**  
27  
28  
29 728 **Figure S11. Forest Plot of “Prestige”.**  
30  
31  
32 729 **Figure S12. Forest Plot of “Advice from Others”.**  
33  
34  
35 730 **Figure S13. Forest Plot of “Student Debt”.**  
36  
37  
38 731 **Figure S14. Funnel Plots of the Publication Bias Tests of the 12 Factors.**  
39  
40  
41  
42 732  
43  
44  
45  
46  
47  
48  
49  
50  
51  
52  
53  
54  
55  
56  
57  
58  
59  
60

**Table 1. Selected Characteristics of the 75 Studies Included in this Systematic Review and Meta-analysis**

| First Author, Year                          | Country     | Survey years | Sample size | Average age | Men, No. (%)  | Scores |
|---------------------------------------------|-------------|--------------|-------------|-------------|---------------|--------|
| Smith et al, <sup>43</sup> 2015             | UK          | 2012         | 2,978       | NR          | NR            | 6      |
| Cochran et al, <sup>44</sup> 2005           | USA         | 2002         | 408         | 27.2        | 214 (52.45)   | 5      |
| Hauer et al, <sup>45</sup> 2008             | USA         | 2007         | 1,177       | NR          | NR            | 6      |
| Johnson et al, <sup>46</sup> 2012           | USA         | 2012         | 622         | NR          | NR            | 6      |
| Kiolbassa et al, <sup>47</sup> 2011         | Germany     | 2010         | 1,114       | 24.1        | 408 (36.62)   | 5      |
| Klingensmith et al, <sup>48</sup> 2015      | USA         | 2013         | 792         | NR          | 539 (68.06)   | 6      |
| Lee et al, <sup>49</sup> 2012               | USA         | 2012         | 100         | NR          | 58 (58)       | 7      |
| Macdonald et al, <sup>50</sup> 2012         | New Zealand | 2011         | 134         | NR          | 79 (58.96)    | 7      |
| Parsa et al, <sup>39</sup> 2010             | Iran        | 2006-2007    | 137         | 27.34       | 49 (35.77)    | 7      |
| Paiva et al, <sup>51</sup> 1982             | USA         | 1982         | 144         | NR          | NR            | 6      |
| Ni Chroinin et al, <sup>52</sup> 2013       | UK          | 2009-2011    | 274         | NR          | 112 (40.89)   | 7      |
| Newton et al, <sup>34</sup> 2005            | USA         | 1998-2004    | 1,258       | NR          | 642 (51.03)   | 8      |
| Rogers et al, <sup>53</sup> 1990            | USA         | 1989         | 266         | NR          | 205 (77.07)   | 6      |
| Abendroth J et al, <sup>54</sup> 2014       | Germany     | 2007-2012    | 45          | NR          | 14 (31)       | 7      |
| Alawad et al, <sup>55</sup> 2015            | USA         | 2010-2011    | 45          | NR          | 36 (80)       | 8      |
| Azizzadeh et al, <sup>56</sup> 2003         | USA         | 2002         | 130         | NR          | NR            | 6      |
| Celenza et al, <sup>57</sup> 2012           | Australia   | 2009         | 216         | NR          | 121 (56.02)   | 8      |
| Dolan-Evans et al, <sup>58</sup> 2014       | Australia   | 2013         | 419         | NR          | 215 (51.31)   | 8      |
| Boyd et al, <sup>59</sup> 2009              | USA         | 2005-2006    | 5,848       | NR          | 2,982 (50.99) | 8      |
| Egerton et al, <sup>60</sup> 1985           | Ireland     | 1977-1981    | 134         | 30          | 82 (61.19)    | 6      |
| Diderichsen et al, <sup>61</sup> 2013       | Sweden      | 2006-2009    | 372         | 27          | 157 (42.20)   | 6      |
| Ferrari et al, <sup>62</sup> 2013           | Italy, UK   | 2009-2011    | 45          | 25          | NR            | 9      |
| Freire et al, <sup>63</sup> 2011            | Brazil      | 2006-2008    | 290         | 23          | 102 (35.17)   | 7      |
| Buddeberg-Fischer et al, <sup>64</sup> 2006 | Switzerland | 2001-2003    | 522         | 31.1        | 241 (46.17)   | 9      |
| Dorsey et al, <sup>65</sup> 2005            | USA         | 2003         | 11,029      | NR          | 4,964 (45.01) | 6      |
| Ekenze et al, <sup>66</sup> 2013            | Nigeria     | 2009-2010    | 96          | 25.9        | NR            | 7      |
| Barikani et al, <sup>67</sup> 2012          | Australia   | 2008-2009    | 49          | 21.7        | NR            | 6      |
| Bittaye et al, <sup>68</sup> 2012           | Gambia      | 2011         | 106         | 24.1        | 48 (45.28)    | 6      |
| Bonura et al, <sup>69</sup> 2016            | USA         | 2015         | 590         | NR          | 321 (54.40)   | 9      |
| Al-Fouzan et al, <sup>70</sup> 2012         | Kuwait      | 2011-2012    | 144         | NR          | NR            | 7      |
| AlKot et al, <sup>71</sup> 2015             | Egypt       | 2013         | 451         | 21.8        | NR            | 7      |
| Borges et al, <sup>72</sup> 2009            | USA         | 2001-2005    | 341         | NR          | NR            | 5      |
| Budd et al, <sup>73</sup> 2011              | UK          | 2011         | 870         | 22          | NR            | 7      |
| Corrigan et al, <sup>74</sup> 2007          | Ireland     | 2007         | 222         | NR          | 142 (63.96)   | 7      |
| Davis et al, <sup>75</sup> 2016             | UK          | 2016         | 173         | NR          | 76 (43.93)    | 7      |



1  
2  
3  
4  
5  
6  
7  
8  
9  
10  
11  
12  
13  
14  
15  
16  
17  
18  
19  
20  
21  
22  
23  
24  
25  
26  
27  
28  
29  
30  
31  
32  
33  
34  
35  
36  
37  
38  
39  
40  
41  
42  
43  
44  
45  
46  
47  
48  
49  
50  
51  
52  
53  
54  
55  
56  
57  
58  
59  
60

|                                       |              |           |        |       |                |   |
|---------------------------------------|--------------|-----------|--------|-------|----------------|---|
| Deutsch et al, <sup>76</sup> 2015     | Germany      | 2011      | 659    | 27.9  | NR             | 8 |
| Gardner et al, <sup>77</sup> 2014     | Australia    | 1993-2005 | 631    | NR    | NR             | 7 |
| Dias et al, <sup>78</sup> 2013        | UK           | 2013      | 495    | NR    | 438 (88.48)    | 5 |
| Goltz et al, <sup>79</sup> 2013       | USA          | 2012      | 102    | 24.5  | 34 (33.33)     | 6 |
| Gupta et al, <sup>80</sup> 2013       | India        | 2013      | 243    | NR    | 179 (73.36)    | 6 |
| Hanzlick et al, <sup>81</sup> 2008    | USA          | 2006      | 161    | NR    | NR             | 6 |
| Harris et al, <sup>82</sup> 2005      | USA          | 1991-2002 | 104    | NR    | 53 (50.96)     | 6 |
| Hauer et al, <sup>83</sup> 2008       | USA          | 2008      | 80     | NR    | NR             | 6 |
| Labiris et al, <sup>84</sup> 2014     | Greece       | 2014      | 111    | 23.6  | 55 (49.54)     | 6 |
| Lambert et al, <sup>85</sup> 2008     | UK           | 2007      | 17,393 | NR    | NR             | 6 |
| Shah et al, <sup>86</sup> 2012        | USA          | 2011      | 892    | NR    | NR             | 6 |
| Lefevre et al, <sup>87</sup> 2010     | USA          | 2008      | 1,555  | NR    | 589 (37.88)    | 6 |
| Vicente et al, <sup>88</sup> 2013     | Chile        | 2013      | 30     | NR    | NR             | 6 |
| Wiesenfeld et al, <sup>89</sup> 2014  | Canada       | 2013      | 60     | NR    | NR             | 7 |
| Lam et al, <sup>90</sup> 2016         | Hong Kong    | 2015      | 228    | 23    | NR             | 9 |
| Hartung et al, <sup>91</sup> 2005     | USA          | 2004      | 192    | 20.59 | 74 (38.54)     | 4 |
| Girasek et al, <sup>92</sup> 2011     | Hungary      | 2011      | 536    | NR    | NR             | 5 |
| Zuccato et al, <sup>93</sup> 2015     | Canada       | 2012      | 37     | NR    | 24 (65)        | 6 |
| Wilbanks et al, <sup>94</sup> 2015    | USA          | 2011-2013 | 29,227 | NR    | 15,164 (51.99) | 9 |
| West et al, <sup>95</sup> 2009        | USA          | 2005-2007 | 14,890 | NR    | 8,700 (58.43)  | 6 |
| Watmough et al, <sup>96</sup> 2007    | UK           | 2005      | 116    | NR    | 66 (56.90)     | 4 |
| Thakur et al, <sup>97</sup> 2001      | USA          | 2001      | 56     | NR    | 53 (95)        | 8 |
| Scott et al, <sup>98</sup> 2011       | Canada       | 2002-2004 | 1,542  | NR    | NR             | 6 |
| Schnuth et al, <sup>99</sup> 2003     | USA          | 2002      | 203    | NR    | 72 (53.47)     | 6 |
| Richards et al, <sup>100</sup> 2009   | UK           | 2009      | 150    | NR    | 108 (72.00)    | 5 |
| Reed et al, <sup>101</sup> 2009       | USA          | 2008      | 2,022  | NR    | 1,354 (66.96)  | 9 |
| de Souza et al, <sup>102</sup> 2015   | Portugal     | 2012      | 1,303  | NR    | NR             | 7 |
| Pikoulis et al, <sup>103</sup> 2010   | Greece       | 2006-2007 | 87     | NR    | NR             | 6 |
| Ozer et al, <sup>104</sup> 2015       | Turkey       | 2013      | 98     | 27.7  | 26 (26.53)     | 6 |
| Noble et al, <sup>105</sup> 2004      | Canada       | 2004      | 21,296 | NR    | NR             | 8 |
| Noble et al, <sup>106</sup> 2010      | Canada       | 2007      | 120    | NR    | NR             | 5 |
| Newton et al, <sup>107</sup> 2005     | USA          | 2004      | 1,286  | NR    | NR             | 6 |
| Moore et al, <sup>108</sup> 2012      | USA          | 2011      | 337    | 26    | 179 (53.12)    | 6 |
| Momen et al, <sup>109</sup> 2015      | Iran         | 2014-2015 | 38     | 35.6  | 11 (29)        | 6 |
| Mehmood et al, <sup>110</sup> 2012    | Saudi Arabia | 2012      | 550    | NR    | 348 (63.27)    | 6 |
| Loriot et al, <sup>111</sup> 2010     | France       | 2007      | 44     | NR    | 17 (39)        | 7 |
| Lefevre et al, <sup>112</sup> 2010    | France       | 2008      | 522    | 23.8  | 198 (37.93)    | 7 |
| Vo et al, <sup>113</sup> 2017         | Canada       | 2017      | 90     | 22.5  | 52 (57.78)     | 5 |
| Grasreiner et al, <sup>114</sup> 2018 | Germany      | 2014-2016 | 181    | 24    | 33 (18.10)     | 6 |
| Alkhaman et al, <sup>115</sup> 2018   | Saudi Arabia | 2017      | 436    | NA    | 250 (57.00)    | 5 |

733 Footnotes: scores: quality score of the AHRQ scale.

734

**Table 2. Meta-analyses of the Factors Influencing Medical Students' Choice of Subspecialty**

| Factor                                           | No. of studies | Total no. of participants | EOI value (%) | 95 CI% of EOI value |       | Cochran's <i>Q</i> | <i>I</i> -square (%) | Tau-square | <i>P</i> -Value |
|--------------------------------------------------|----------------|---------------------------|---------------|---------------------|-------|--------------------|----------------------|------------|-----------------|
|                                                  |                |                           |               | Lower               | Upper |                    |                      |            |                 |
| Academic interests                               | 38             | 82,366                    | 75.29         | 66.93               | 82.11 | 14719.76           | 99.70                | 1.60       | <0.0001         |
| Competencies                                     | 17             | 76,515                    | 55.15         | 33.63               | 74.90 | 23572.74           | 99.90                | 3.44       | <0.0001         |
| Controllable lifestyle or flexible work schedule | 44             | 101,001                   | 53.00         | 47.90               | 58.03 | 8624.46            | 99.50                | 0.45       | <0.0001         |
| Patient service orientation                      | 37             | 46,572                    | 50.04         | 44.65               | 55.43 | 2668.79            | 98.70                | 0.41       | <0.0001         |
| Medical teachers or mentors                      | 32             | 85,071                    | 46.93         | 37.77               | 56.30 | 15216.32           | 99.80                | 1.14       | <0.0001         |
| Career opportunities                             | 38             | 81,923                    | 44.00         | 32.26               | 48.78 | 13553.20           | 99.70                | 1.15       | <0.0001         |
| Workload or working hours                        | 20             | 22,051                    | 37.99         | 29.59               | 47.19 | 584.81             | 98.30                | 0.69       | <0.0001         |
| Income                                           | 50             | 109,791                   | 34.70         | 28.36               | 41.62 | 16952.48           | 99.70                | 1.09       | <0.0001         |
| Length of training                               | 18             | 42,046                    | 32.30         | 27.61               | 37.37 | 917.21             | 98.10                | 0.20       | <0.0001         |
| Prestige                                         | 26             | 30,629                    | 31.17         | 26.32               | 37.69 | 1464.67            | 98.30                | 0.52       | <0.0001         |
| Advice from others                               | 18             | 82,692                    | 28.24         | 22.26               | 34.23 | 7679.73            | 99.80                | 0.02       | <0.0001         |
| Student debt                                     | 8              | 38,917                    | 15.33         | 10.96               | 21.03 | 574.81             | 98.80                | 0.27       | <0.0001         |

735

**Table 3. Meta-regression of the EOI Value Stratified by Study-level Characteristics**

| Factor                                           |              | estimate | 95 CI% of estimate |         | P-Value |
|--------------------------------------------------|--------------|----------|--------------------|---------|---------|
|                                                  |              |          | Lower              | Upper   |         |
| Academic interests                               | Country      | -0.2314  | -1.1575            | 0.6946  | 0.6302  |
|                                                  | Survey years | 0.3811   | -0.3580            | 1.1202  | 0.2711  |
|                                                  | Specialty    | -0.4892  | -1.5345            | 0.5562  | 0.4008  |
|                                                  | Sample size  | 0.2362   | -0.5488            | 1.0212  | 0.6537  |
| Competencies                                     | Country      | 0.6946   | -1.1461            | 0.8938  | 0.8376  |
|                                                  | Survey years | -1.0418  | -2.0950            | 0.0114  | 0.0151  |
|                                                  | Specialty    | 0.0904   | -1.5786            | 1.7594  | 0.9398  |
|                                                  | Sample size  | -0.5720  | -1.8606            | 0.7166  | 0.5823  |
| Controllable lifestyle or flexible work schedule | Country      | -0.1261  | -1.1461            | 0.8938  | 0.9614  |
|                                                  | Survey years | -0.0001  | -0.4052            | 0.4051  | 0.9822  |
|                                                  | Specialty    | -0.8989  | -1.4979            | -0.3000 | 0.0035  |
|                                                  | Sample size  | -0.0518  | -0.4396            | 0.3361  | 0.7203  |
| Patient service orientation                      | Country      | -0.6238  | -1.3118            | 0.0642  | 0.0833  |
|                                                  | Survey years | -0.0414  | -0.6912            | 0.6083  | 0.8524  |
|                                                  | Specialty    | -1.5982  | -2.5227            | -0.6737 | 0.0010  |
|                                                  | Sample size  | -0.1157  | -0.7473            | 0.5159  | 0.6358  |
| Medical teachers or mentors                      | Country      | 0.7395   | 0.3117             | 1.1674  | 0.0007  |
|                                                  | Survey years | 0.1133   | -0.3580            | 0.5845  | 0.6376  |
|                                                  | Specialty    | 0.0605   | -0.4441            | 0.5652  | 0.8141  |
|                                                  | Sample size  | -0.1202  | -0.5567            | 0.3163  | 0.5894  |
| Career opportunities                             | Country      | 0.1075   | -0.7030            | 0.9179  | 0.5828  |
|                                                  | Survey years | 0.3284   | -0.3913            | 1.0480  | 0.7546  |
|                                                  | Specialty    | -0.9292  | -1.8015            | -0.0570 | 0.0077  |
|                                                  | Sample size  | 0.3654   | 0.1156             | 1.5478  | 0.0081  |
| Workload or working hours                        | Country      | -0.4535  | -1.5086            | 0.6016  | 0.3981  |
|                                                  | Survey years | 0.4624   | -0.5417            | 1.4665  | 0.3922  |
|                                                  | Specialty    | -0.9878  | -2.1727            | 0.1972  | 0.1070  |
|                                                  | Sample size  | 0.0982   | -0.8589            | 1.0553  | 0.8205  |
| Income                                           | Country      | 0.1058   | -0.4665            | 0.6781  | 0.7390  |
|                                                  | Survey years | 0.0999   | -0.4379            | 0.6377  | 0.8774  |
|                                                  | Specialty    | -0.6457  | -1.3267            | 0.0352  | 0.0480  |
|                                                  | Sample size  | 0.0523   | -0.4826            | 0.5872  | 0.6786  |
| Length of training                               | Country      | -0.1559  | -1.2782            | 0.9664  | 0.7854  |
|                                                  | Survey years | -0.2158  | -1.4089            | 0.9772  | 0.7229  |
|                                                  | Specialty    | 0.3959   | -0.9585            | 1.7502  | 0.5667  |
|                                                  | Sample size  | 0.1565   | -0.6631            | 0.9761  | 0.7082  |

|                    |              |         |         |         |         |
|--------------------|--------------|---------|---------|---------|---------|
|                    | Country      | -0.3346 | -1.0799 | 0.4106  | 0.3485  |
| Prestige           | Survey years | -0.4513 | -1.1378 | 0.2352  | 0.0950  |
|                    | Specialty    | -1.0112 | -1.8980 | -0.1244 | 0.0172  |
|                    | Sample size  | 0.0355  | -0.6013 | 0.6723  | 0.5214  |
|                    | Country      | -0.0097 | -0.0722 | 0.0529  | 0.9328  |
| Advice from others | Survey years | -0.0861 | -0.1471 | -0.0251 | 0.0057  |
|                    | Specialty    | -0.2017 | -0.2790 | -0.1244 | <0.0001 |
|                    | Sample size  | 0.2125  | 0.1309  | 0.2941  | <0.0001 |
|                    | Country      | 2.7853  | 2.0544  | 3.5162  | 0.0001  |
| Student debt       | Survey years | -0.1567 | -0.6707 | 0.3573  | 0.5502  |
|                    | Sample size  | -0.5248 | -1.0108 | -0.0388 | 0.0343  |

736

For peer review only

1  
2  
3  
4  
5  
6  
7  
8  
9  
10  
11  
12  
13  
14  
15  
16  
17  
18  
19  
20  
21  
22  
23  
24  
25  
26  
27  
28  
29  
30  
31  
32  
33  
34  
35  
36  
37  
38  
39  
40  
41  
42  
43  
44  
45  
46  
47  
48  
49  
50  
51  
52  
53  
54  
55  
56  
57  
58  
59  
60

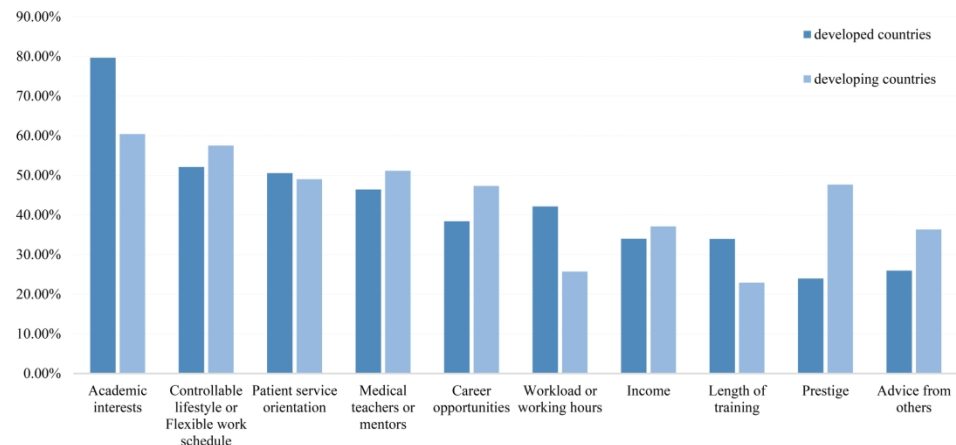

Figure 1. Bar Graph of the Meta-analyses of the Factors Influencing Medical Students' Choice of Subspecialty Stratified by Region.

190x107mm (300 x 300 DPI)

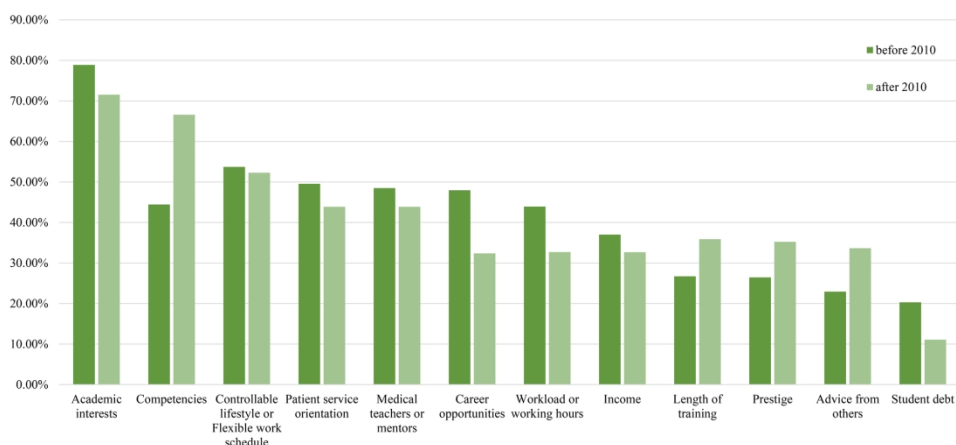

Figure 2. Bar Graph of the Meta-analyses of the Factors Influencing Medical Students' Choice of Subspecialty Stratified by Survey Year.

190x107mm (300 x 300 DPI)

1  
2  
3  
4 **SI Methods. Search strategy used in the current systematic review and meta-**  
5  
6 **analysis.**  
7  
8  
9

10  
11 ***Medical Students***

- 12  
13  
14 1. Students, Medical [Mesh]  
15  
16 2. Medical students  
17  
18 3. Medical student  
19  
20 4. Student, Medical  
21  
22 5. OR / 1 – 4  
23  
24  
25  
26  
27  
28  
29

13. Cross sectional study  
14. Cross sectional study [Publication  
Type]  
15. Cross sectional study [Mesh Terms]  
16. Systematic review  
17. Systematic review [Publication Type]  
18. Systematic review [Mesh Terms]

30 ***Subspecialty Choice***

- 31  
32 6. Career choices  
33  
34 7. Choice, Career  
35  
36 8. Choices career  
37  
38 9. Specialties  
39  
40  
41  
42 10. Sub-specialties  
43  
44 11. Sub-discipline  
45  
46  
47 12. OR / 6 – 11  
48  
49  
50

19. Meta-analysis [Title/Abstract]  
20. Meta-analysis [Mesh Terms]  
21. Meta-analysis [Publication Type]  
22. OR / 12 – 21

51 ***Factors***

23. Factors

52 ***Combined search***

53 ***Study design***

23. #5 AND #12AND #22 AND #2

54 **Abbreviations:** MeSH, Medical Subject Heading in PubMed  
55  
56  
57  
58  
59  
60

**Table S1. Quality assessment of the included studies**

| Quality assessment criteria                    | 1 | 2 | 3 | 4 | 5 | 6 | 7 | 8 | 9 | 10 | 11 | Scores |
|------------------------------------------------|---|---|---|---|---|---|---|---|---|----|----|--------|
| 1 Smith et al, <sup>41</sup> 2015              | Y | U | Y | Y | N | Y | N | Y | N | Y  | N  | 6      |
| 2 Cochran et al, <sup>42</sup> 2005            | Y | U | Y | Y | N | Y | N | Y | N | N  | N  | 5      |
| 3 Hauer et al, <sup>43</sup> 2008              | Y | U | Y | Y | N | Y | N | Y | N | Y  | N  | 6      |
| 4 Johnson et al, <sup>44</sup> 2012            | Y | U | Y | Y | N | Y | N | Y | N | Y  | N  | 6      |
| 5 Kiolbassa et al, <sup>45</sup> 2011          | Y | U | Y | Y | N | Y | N | Y | N | N  | N  | 5      |
| 6 Klingensmith et al, <sup>46</sup> 2015       | Y | U | Y | Y | N | Y | N | Y | N | Y  | N  | 6      |
| 7 Lee et al, <sup>47</sup> 2012                | Y | U | Y | Y | Y | Y | N | Y | N | Y  | N  | 7      |
| 8 Macdonald et al, <sup>48</sup> 2012          | Y | U | Y | Y | Y | Y | N | Y | N | Y  | N  | 7      |
| 9 Parsa et al, <sup>37</sup> 2010              | Y | U | Y | Y | Y | Y | N | Y | N | Y  | N  | 7      |
| 10 Paiva et al, <sup>49</sup> 1982             | Y | U | Y | Y | N | Y | N | Y | N | Y  | N  | 6      |
| 11 Ni Chroinin et al, <sup>50</sup> 2013       | Y | U | Y | Y | Y | Y | N | Y | N | Y  | N  | 7      |
| 12 Newton et al, <sup>32</sup> 2005            | Y | U | Y | Y | Y | Y | Y | Y | N | Y  | N  | 8      |
| 13 Rogers et al, <sup>51</sup> 1990            | Y | U | Y | Y | N | Y | N | Y | N | Y  | N  | 6      |
| 14 Abendroth J et al, <sup>52</sup> 2014       | Y | U | Y | Y | N | Y | N | Y | N | Y  | Y  | 7      |
| 15 Alawad et al, <sup>53</sup> 2015            | Y | U | Y | Y | N | Y | Y | Y | Y | Y  | N  | 8      |
| 16 Azizzadeh et al, <sup>54</sup> 2003         | Y | U | Y | Y | Y | Y | N | N | N | Y  | N  | 6      |
| 17 Celenza et al, <sup>55</sup> 2012           | Y | U | Y | Y | Y | Y | Y | N | Y | Y  | N  | 8      |
| 18 Dolan-Evans et al, <sup>56</sup> 2014       | Y | U | Y | Y | Y | Y | N | Y | N | Y  | Y  | 8      |
| 19 Boyd et al, <sup>57</sup> 2009              | Y | U | Y | Y | Y | Y | Y | Y | N | Y  | N  | 8      |
| 20 Egerton et al, <sup>58</sup> 1985           | Y | U | Y | Y | N | Y | N | Y | N | Y  | N  | 6      |
| 21 Diderichsen et al, <sup>59</sup> 2013       | Y | U | Y | Y | N | Y | N | Y | N | Y  | N  | 6      |
| 22 Ferrari et al, <sup>60</sup> 2013           | Y | U | Y | Y | Y | Y | Y | Y | Y | Y  | N  | 9      |
| 23 Freire et al, <sup>61</sup> 2011            | Y | U | Y | Y | Y | Y | N | Y | N | Y  | N  | 7      |
| 24 Buddeberg-Fischer et al, <sup>62</sup> 2006 | Y | U | Y | Y | N | Y | Y | Y | Y | Y  | Y  | 9      |
| 25 Dorsey et al, <sup>63</sup> 2005            | Y | U | Y | Y | N | Y | N | Y | N | Y  | N  | 6      |
| 26 Ekenze et al, <sup>64</sup> 2013            | Y | U | Y | Y | Y | Y | Y | N | N | Y  | N  | 7      |
| 27 Barikani et al, <sup>65</sup> 2012          | Y | U | Y | Y | N | Y | N | Y | N | Y  | N  | 6      |
| 28 Bittaye et al, <sup>66</sup> 2012           | Y | U | Y | Y | N | Y | N | Y | N | Y  | N  | 6      |
| 39 Bonura et al, <sup>67</sup> 2016            | Y | U | Y | Y | Y | Y | Y | Y | Y | Y  | N  | 9      |
| 30 Al-Fouzan et al, <sup>68</sup> 2012         | Y | U | Y | Y | Y | Y | N | Y | N | Y  | N  | 7      |
| 31 AlKot et al, <sup>69</sup> 2015             | Y | U | Y | Y | Y | Y | N | Y | N | Y  | N  | 7      |
| 32 Borges et al, <sup>70</sup> 2009            | Y | U | Y | Y | N | Y | N | N | N | Y  | N  | 5      |
| 33 Budd et al, <sup>71</sup> 2011              | Y | U | Y | Y | Y | Y | N | Y | N | Y  | N  | 7      |
| 34 Corrigan et al, <sup>72</sup> 2007          | Y | U | Y | Y | Y | Y | N | Y | N | Y  | N  | 7      |
| 35 Davis et al, <sup>73</sup> 2016             | Y | U | Y | Y | Y | Y | N | Y | N | Y  | N  | 7      |
| 36 Deutsch et al, <sup>74</sup> 2015           | Y | U | Y | Y | Y | Y | N | Y | Y | Y  | N  | 8      |
| 37 Gardner et al, <sup>75</sup> 2014           | Y | U | Y | Y | N | Y | N | Y | N | Y  | N  | 7      |
| 38 Dias et al, <sup>76</sup> 2013              | Y | U | Y | Y | N | Y | N | N | N | Y  | N  | 5      |
| 39 Goltz et al, <sup>77</sup> 2013             | Y | U | Y | Y | N | Y | N | Y | N | Y  | N  | 6      |
| 40 Gupta et al, <sup>78</sup> 2013             | Y | U | Y | Y | N | Y | N | Y | N | Y  | N  | 6      |
| 41 Hanzlick et al, <sup>79</sup> 2008          | Y | U | Y | Y | N | Y | N | Y | N | Y  | N  | 6      |
| 42 Harris et al, <sup>80</sup> 2005            | Y | U | Y | Y | N | Y | N | Y | N | Y  | N  | 6      |
| 43 Hauer et al, <sup>81</sup> 2008             | Y | U | Y | Y | N | Y | N | Y | N | Y  | N  | 6      |
| 44 Labiris et al, <sup>82</sup> 2014           | Y | U | Y | Y | N | Y | N | Y | N | Y  | N  | 6      |
| 45 Lambert et al, <sup>83</sup> 2008           | Y | U | Y | Y | N | Y | N | Y | N | Y  | N  | 6      |
| 46 Shah et al, <sup>84</sup> 2012              | Y | U | Y | Y | N | Y | N | Y | N | Y  | N  | 6      |
| 47 Lefevre et al, <sup>85</sup> 2010           | Y | U | Y | Y | N | Y | N | Y | N | Y  | N  | 6      |
| 48 Vicente et al, <sup>86</sup> 2013           | Y | U | Y | Y | N | N | Y | N | Y | Y  | N  | 6      |
| 49 Wiesenfeld et al, <sup>87</sup> 2014        | Y | U | Y | Y | Y | Y | N | Y | N | Y  | N  | 7      |
| 50 Lam et al, <sup>88</sup> 2016               | Y | U | Y | Y | Y | Y | Y | Y | Y | Y  | N  | 9      |
| 51 Hartung et al, <sup>89</sup> 2005           | Y | U | Y | Y | N | Y | N | N | N | N  | N  | 4      |
| 52 Girasek et al, <sup>90</sup> 2011           | Y | U | Y | Y | N | Y | N | N | N | Y  | N  | 5      |
| 53 Zuccato et al, <sup>91</sup> 2015           | Y | U | Y | Y | N | Y | N | Y | N | Y  | N  | 6      |
| 54 Wilbanks et al, <sup>92</sup> 2015          | Y | U | Y | Y | N | Y | Y | Y | Y | Y  | Y  | 9      |
| 55 West et al, <sup>93</sup> 2009              | Y | U | Y | Y | N | Y | N | Y | N | Y  | N  | 6      |
| 56 Watmough et al, <sup>94</sup> 2007          | Y | U | Y | Y | N | N | N | N | N | Y  | N  | 4      |
| 57 Thakur et al, <sup>95</sup> 2001            | Y | U | Y | Y | Y | Y | Y | N | Y | Y  | N  | 8      |
| 58 Scott et al, <sup>96</sup> 2011             | Y | U | Y | Y | N | Y | N | Y | N | Y  | N  | 6      |
| 59 Schnuth et al, <sup>97</sup> 2003           | Y | U | Y | Y | N | Y | N | Y | N | Y  | N  | 6      |
| 60 Richards et al, <sup>98</sup> 2009          | Y | U | Y | Y | N | Y | N | N | N | Y  | N  | 5      |
| 61 Reed et al, <sup>99</sup> 2009              | Y | U | Y | Y | Y | Y | Y | Y | Y | Y  | N  | 9      |
| 62 de Souza et al, <sup>100</sup> 2015         | Y | U | Y | Y | Y | Y | N | Y | N | Y  | N  | 7      |
| 63 Pikoulis et al, <sup>101</sup> 2010         | Y | U | Y | Y | N | Y | N | Y | N | Y  | N  | 6      |
| 64 Ozer et al, <sup>102</sup> 2015             | Y | U | Y | Y | N | N | Y | N | Y | Y  | N  | 6      |
| 65 Noble et al, <sup>103</sup> 2004            | Y | U | Y | Y | Y | Y | Y | Y | N | Y  | N  | 8      |
| 66 Noble et al, <sup>104</sup> 2010            | Y | U | Y | Y | N | Y | N | N | N | Y  | N  | 5      |
| 67 Newton et al, <sup>105</sup> 2005           | Y | U | Y | Y | N | Y | Y | N | N | Y  | N  | 6      |
| 68 Moore et al, <sup>106</sup> 2012            | Y | U | Y | Y | Y | Y | N | Y | N | N  | N  | 6      |
| 69 Momen et al, <sup>107</sup> 2015            | Y | U | Y | Y | N | Y | N | Y | N | Y  | N  | 6      |
| 70 Mehmood et al, <sup>108</sup> 2012          | Y | U | Y | Y | N | Y | N | Y | N | Y  | N  | 6      |
| 71 Loriot et al, <sup>109</sup> 2010           | Y | U | Y | Y | Y | Y | N | Y | N | Y  | N  | 7      |
| 72 Lefevre et al, <sup>110</sup> 2010          | Y | U | Y | Y | Y | Y | N | Y | N | Y  | N  | 7      |
| 73 Vo et al, <sup>111</sup> 2017               | Y | U | Y | Y | Y | N | N | N | N | Y  | N  | 5      |
| 74 Grasreiner et al, <sup>112</sup> 2018       | Y | U | Y | Y | Y | Y | N | N | N | Y  | N  | 6      |
| 75 Alkhaman et al, <sup>113</sup> 2018         | Y | U | Y | Y | N | N | Y | N | N | Y  | N  | 5      |

**Quality assessment criteria in detail**

1. Define the source of information (survey, record review).
2. List the inclusion and exclusion criteria for the exposed and unexposed subjects (cases and controls) or refer to previous publications.
3. Indicate the time period used for identifying patients.
4. Indicate whether the subjects were consecutive if not population-based.
5. Indicate whether the evaluators of the subjective components of the study were masked to the other aspects of participants' status.
6. Describe any assessments undertaken for quality assurance purposes (e.g., test/retest of primary outcome measurements)
7. Explain any patient exclusion from the analyses.
8. Describe how confounding was assessed and/or controlled.
9. If applicable, explain how missing data were handled in the analysis.
10. Summarize the patient response rates and the completeness of the data collection.
11. Clarify what follow-up, if any, was expected and the percentage of patients with incomplete data or follow-up.

“Y”: Yes; “N”: No; “U”: Unclear.



**Table S2. Meta-analyses of the Factors Influencing Medical Students' Choice of Subspecialty Stratified by Region and Survey Year.**

| Factor                                           |             | No. of studies | Total no. of participants | Extent of influence (%) | 95 CI% of EOI value |       | <i>I-square</i> (%) | <i>P</i> -Value | <i>Q</i> -Value |      |      |
|--------------------------------------------------|-------------|----------------|---------------------------|-------------------------|---------------------|-------|---------------------|-----------------|-----------------|------|------|
|                                                  |             |                |                           |                         | Lower               | Upper |                     |                 |                 |      |      |
| Academic interest                                | developed   | 28             | 80,000                    | 79.66                   | 70.73               | 86.39 | 99.8                | 0.02            | 3.51            |      |      |
|                                                  | developing  | 10             | 2,366                     | 60.41                   | 43.44               | 75.19 | 98.0                |                 |                 |      |      |
|                                                  | before 2010 | 29             | 44,174                    | 78.88                   | 69.04               | 86.22 | 99.7                | 0.40            | 1.21            |      |      |
|                                                  | after 2010  | 9              | 38,192                    | 71.54                   | 57.66               | 82.27 | 99.6                |                 |                 |      |      |
| Competencies                                     | before 2010 | 9              | 43,134                    | 44.40                   | 29.11               | 60.83 | 99.8                | 0.21            | 1.86            |      |      |
|                                                  | after 2010  | 8              | 33,381                    | 66.60                   | 34.48               | 88.31 | 99.8                |                 |                 |      |      |
| Controllable lifestyle or flexible work schedule | developed   | 37             | 100,980                   | 52.11                   | 46.52               | 57.65 | 99.6                | 0.63            | 0.68            |      |      |
|                                                  | developing  | 7              | 2,017                     | 57.50                   | 45.81               | 68.41 | 95.9                |                 |                 |      |      |
|                                                  | before 2010 | 22             | 62,945                    | 53.72                   | 47.48               | 59.84 | 99.4                |                 |                 | 0.97 | 0.05 |
| after 2010                                       | 22          | 40,056         | 52.29                     | 43.51                   | 60.93               | 99.2  |                     |                 |                 |      |      |
| Patient service orientation                      | developed   | 27             | 44,235                    | 50.56                   | 44.68               | 56.42 | 98.8                | 0.74            | 0.48            |      |      |
|                                                  | developing  | 10             | 2,337                     | 49.02                   | 31.62               | 66.67 | 98.1                |                 |                 |      |      |
|                                                  | before 2010 | 18             | 40,997                    | 49.56                   | 43.29               | 55.84 | 98.8                |                 |                 | 0.70 | 0.54 |
|                                                  | after 2010  | 19             | 5,579                     | 43.87                   | 38.62               | 63.80 | 98.3                |                 |                 |      |      |
| Medical teachers or mentors                      | developed   | 28             | 84,076                    | 46.43                   | 36.63               | 56.52 | 99.8                | 0.73            | 0.48            |      |      |
|                                                  | developing  | 4              | 995                       | 51.14                   | 33.97               | 68.04 | 95.4                |                 |                 |      |      |
|                                                  | before 2010 | 21             | 49,654                    | 48.48                   | 36.93               | 60.19 | 99.8                |                 |                 | 0.70 | 0.54 |
|                                                  | after 2010  | 11             | 35,417                    | 43.87                   | 27.94               | 61.18 | 99.7                |                 |                 |      |      |
| Career opportunities                             | developed   | 31             | 79,867                    | 38.41                   | 29.61               | 48.04 | 99.8                | 0.60            | 0.74            |      |      |
|                                                  | developing  | 7              | 2,056                     | 47.32                   | 30.38               | 64.91 | 98.1                |                 |                 |      |      |
|                                                  | before 2010 | 20             | 43,417                    | 47.97                   | 33.54               | 62.74 | 99.8                |                 |                 | 0.24 | 1.68 |
|                                                  | after 2010  | 18             | 38,506                    | 32.38                   | 21.68               | 45.31 | 99.5                |                 |                 |      |      |
| Workload or working hours                        | developed   | 15             | 20,970                    | 42.14                   | 31.35               | 53.72 | 98.6                | 0.34            | 1.39            |      |      |
|                                                  | developing  | 5              | 1,081                     | 25.72                   | 13.29               | 43.88 | 95.3                |                 |                 |      |      |
|                                                  | before 2010 | 9              | 19,456                    | 43.93                   | 29.43               | 59.54 | 98.8                |                 |                 | 0.41 | 1.21 |
|                                                  | after 2010  | 11             | 2,595                     | 32.70                   | 29.43               | 59.54 | 97.4                |                 |                 |      |      |
| Income                                           | developed   | 39             | 107,091                   | 34.01                   | 26.89               | 41.93 | 99.8                | 0.84            | 0.29            |      |      |
|                                                  | developing  | 11             | 2,700                     | 37.11                   | 27.06               | 48.41 | 96.4                |                 |                 |      |      |
|                                                  | before 2010 | 25             | 68,714                    | 37.01                   | 25.95               | 49.62 | 99.8                |                 |                 | 0.41 | 1.18 |
|                                                  | after 2010  | 25             | 41,077                    | 32.67                   | 26.04               | 40.07 | 98.9                |                 |                 |      |      |
| Length of training                               | developed   | 15             | 41,246                    | 33.95                   | 28.72               | 39.60 | 98.4                | 0.31            | 1.48            |      |      |
|                                                  | developing  | 3              | 800                       | 22.92                   | 10.94               | 41.85 | 94.0                |                 |                 |      |      |
|                                                  | before 2010 | 7              | 8,811                     | 26.72                   | 15.89               | 41.29 | 98.9                |                 |                 | 0.28 | 1.59 |
|                                                  | after 2010  | 11             | 33,234                    | 35.87                   | 29.67               | 42.59 | 96.9                |                 |                 |      |      |
| Prestige                                         | developed   | 17             | 27,987                    | 23.96                   | 19.20               | 29.47 | 97.3                | 0.01            | 4.71            |      |      |
|                                                  | developing  | 9              | 2,642                     | 47.65                   | 34.41               | 61.24 | 97.6                |                 |                 |      |      |
|                                                  | before 2010 | 12             | 25,542                    | 26.46                   | 20.78               | 33.03 | 96.7                |                 |                 | 0.25 | 1.67 |
|                                                  | after 2010  | 14             | 5,087                     | 35.22                   | 24.70               | 47.40 | 98.3                |                 |                 |      |      |
| Advice from others                               | developed   | 14             | 81,205                    | 25.95                   | 19.27               | 32.64 | 99.8                | 0.36            | 1.33            |      |      |
|                                                  | developing  | 4              | 1,487                     | 36.34                   | 18.91               | 53.77 | 98.1                |                 |                 |      |      |
|                                                  | before 2010 | 10             | 48,319                    | 22.93                   | 17.85               | 28.01 | 99.5                |                 |                 | 0.31 | 1.47 |
|                                                  | after 2010  | 8              | 34,373                    | 33.65                   | 25.12               | 42.18 | 99.1                |                 |                 |      |      |
| Student debt                                     | before 2010 | 5              | 6,610                     | 20.29                   | 15.86               | 25.57 | 81.8                | 0.69            | 0.59            |      |      |
|                                                  | after 2010  | 3              | 32,307                    | 11.08                   | 1.58                | 49.08 | 99.6                |                 |                 |      |      |

**Figure S1. Flow Diagram of the Study Inclusion.**

Figure S2. Forest Plot of “Academic Interest”.

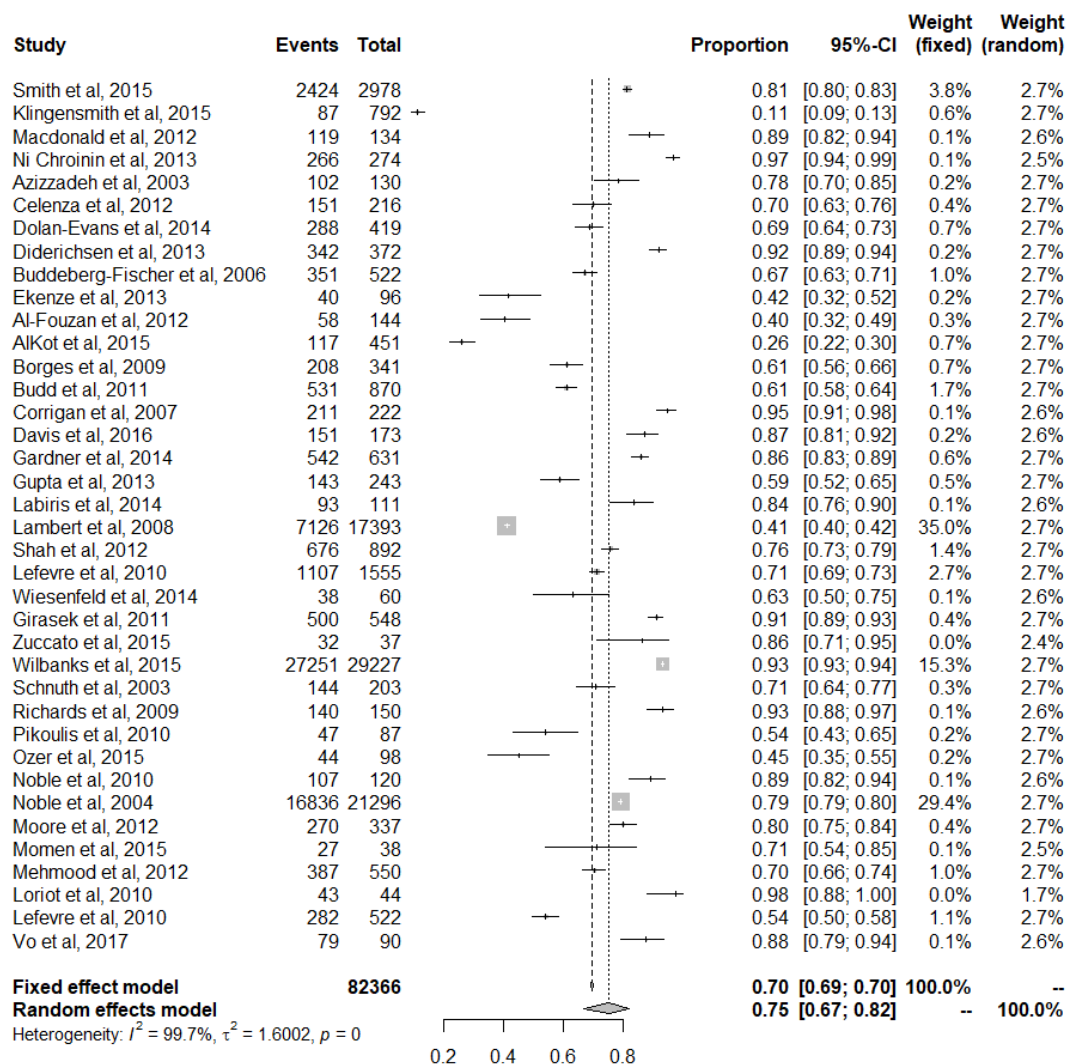

**Figure S3. Forest Plot of “Competencies”.**

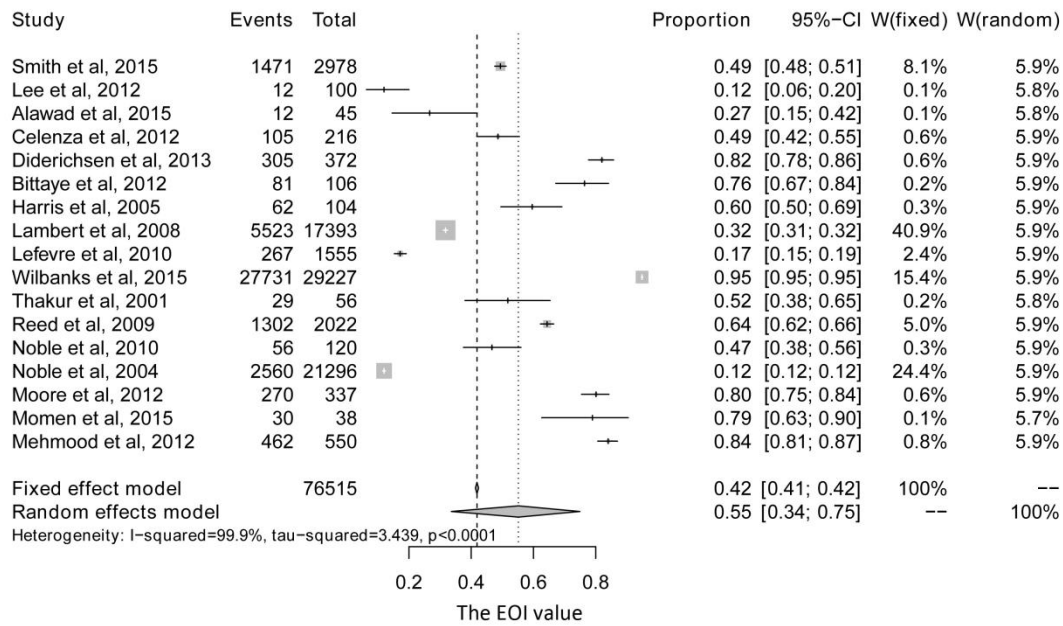

review only

Figure S4. Forest Plot of “Controllable Lifestyle or Flexible Work Schedule”.

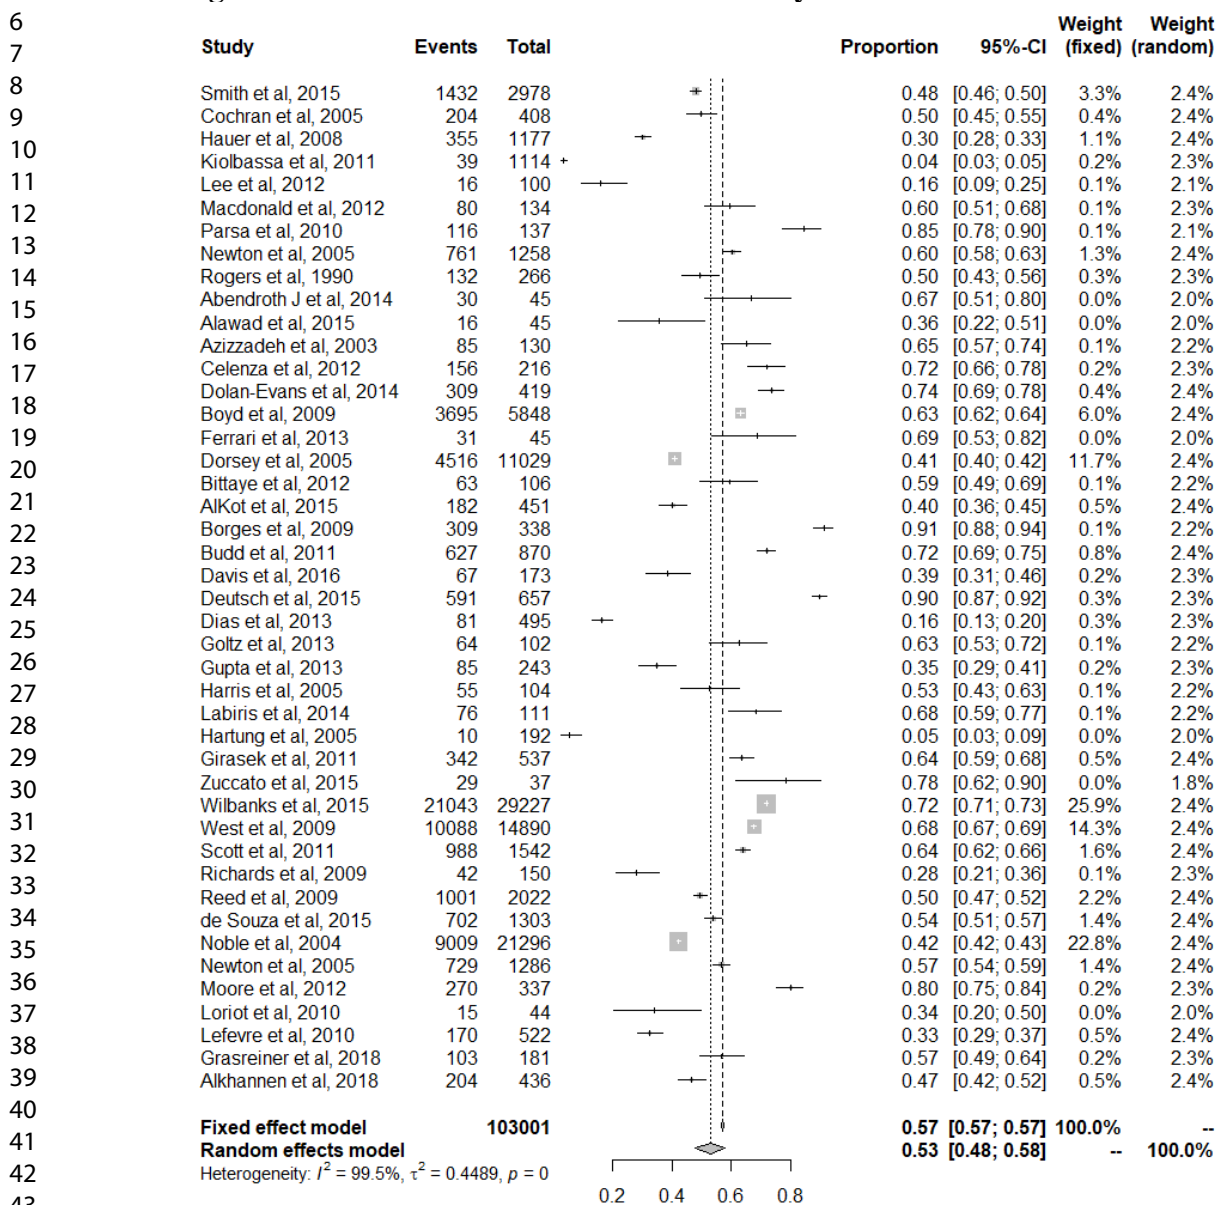

Figure S5. Forest Plot of “Patient Service Orientation”.

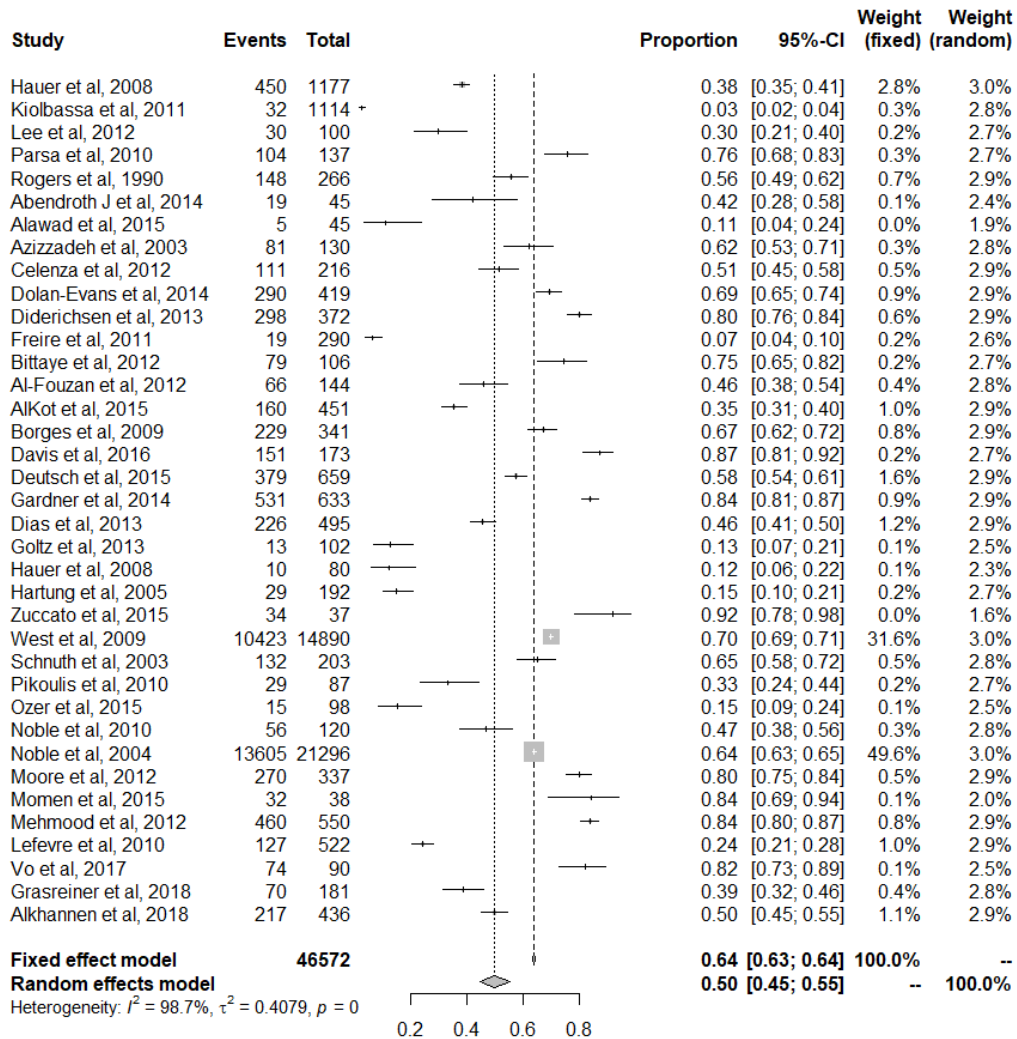

Figure S6. Forest Plot of “Medical Teachers or Mentors”.

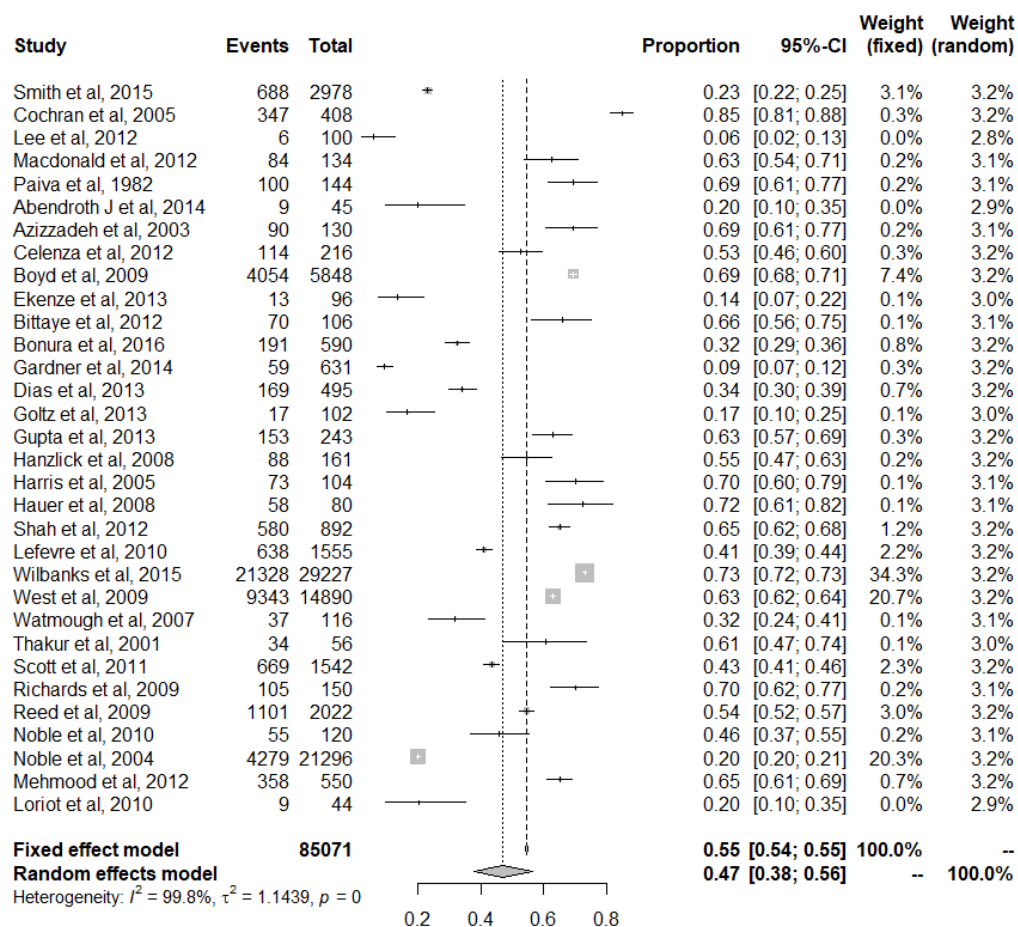

Figure S7. Forest Plot of “Career Opportunities”.

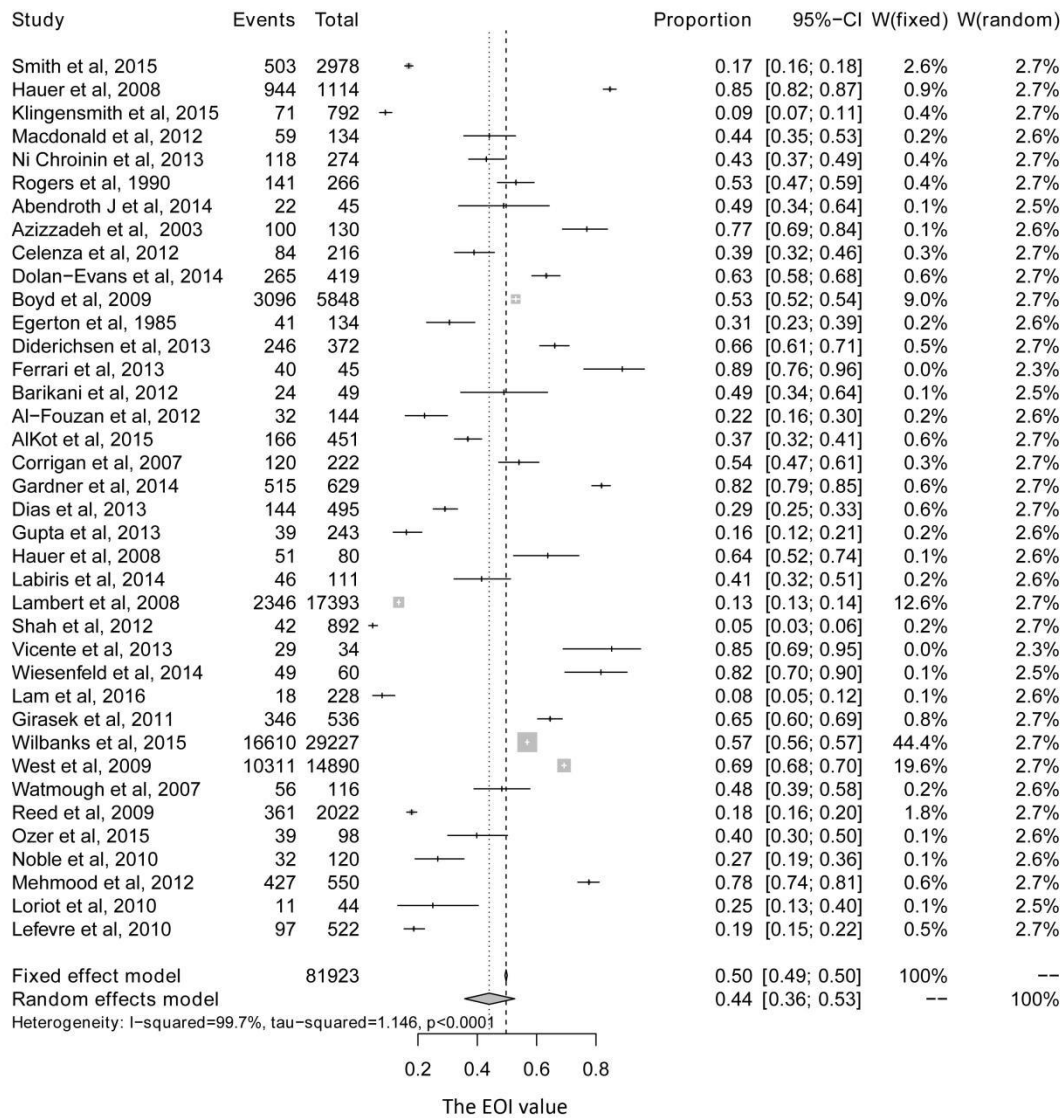



Figure S8. Forest Plot of “Workload or Working Hours”.

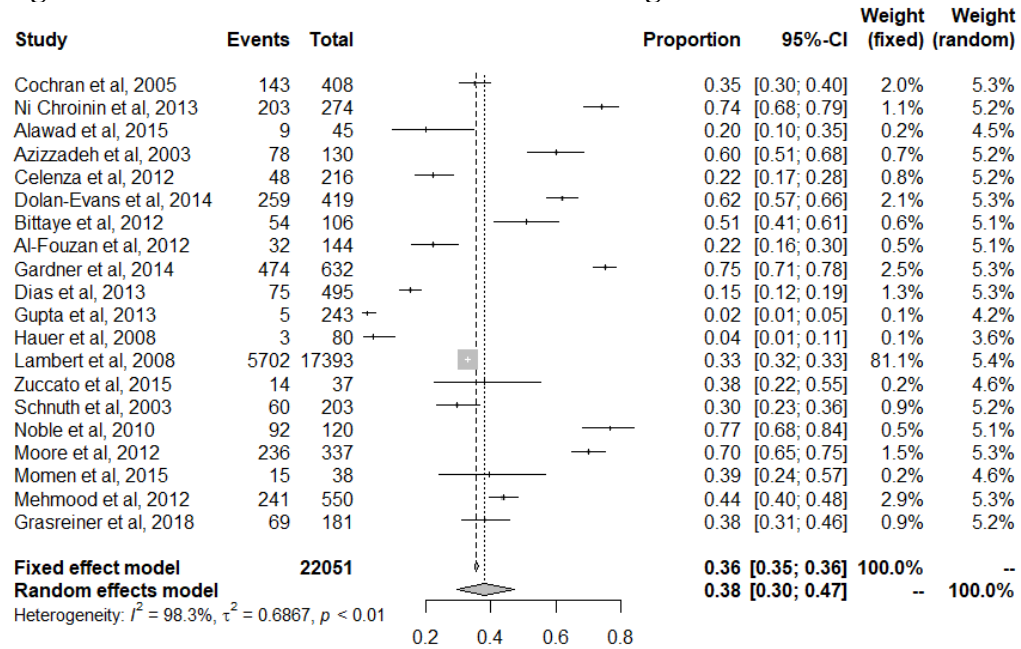

Figure S9. Forest Plot of “Income”.

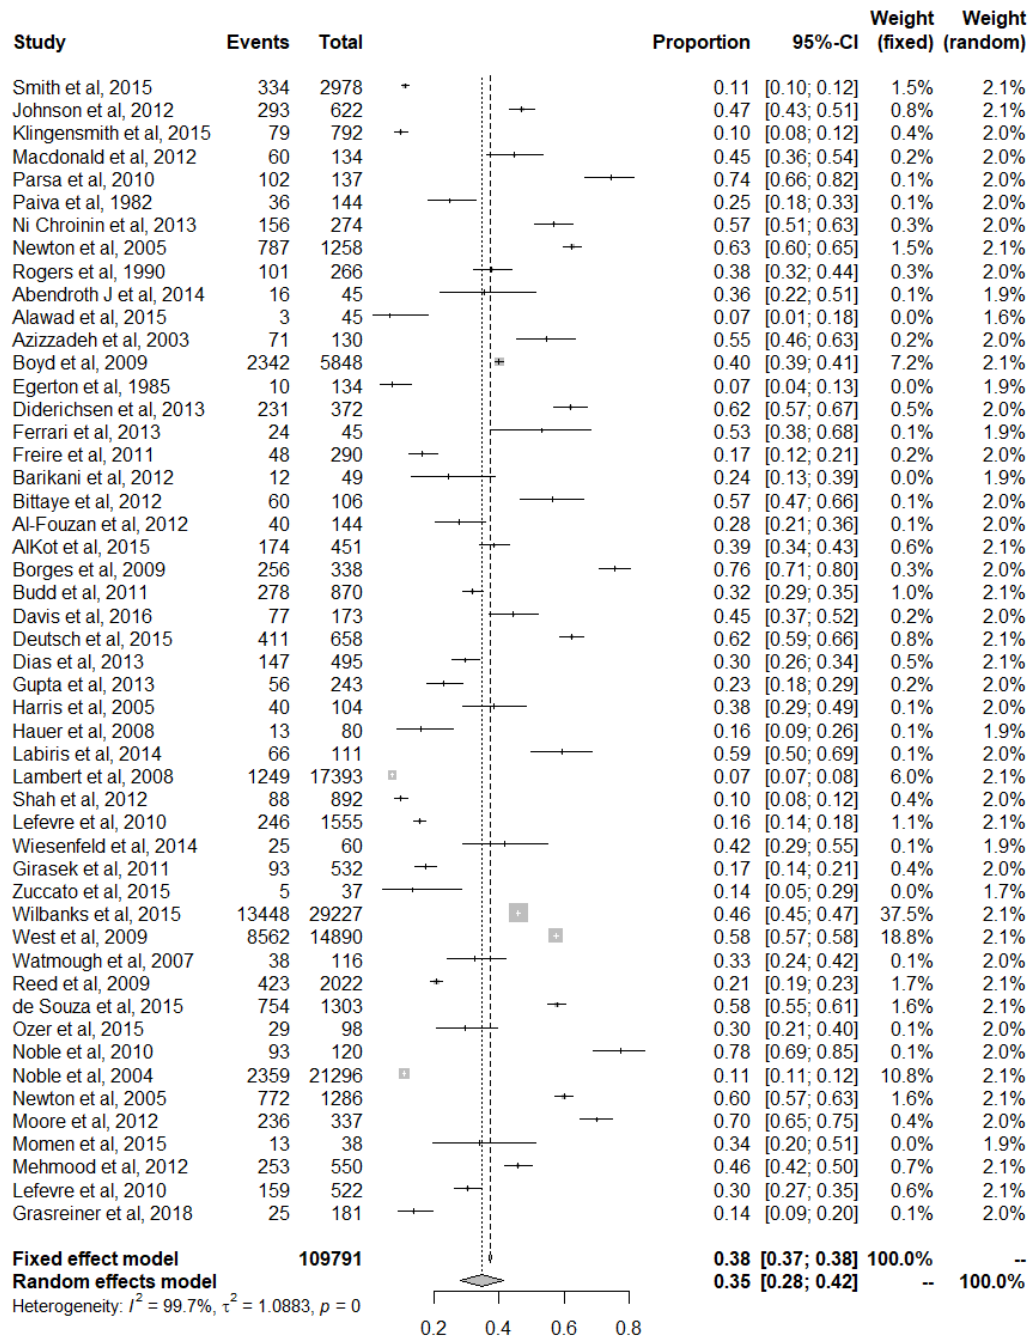

**Figure S10. Forest Plot of “Length of Training”.**

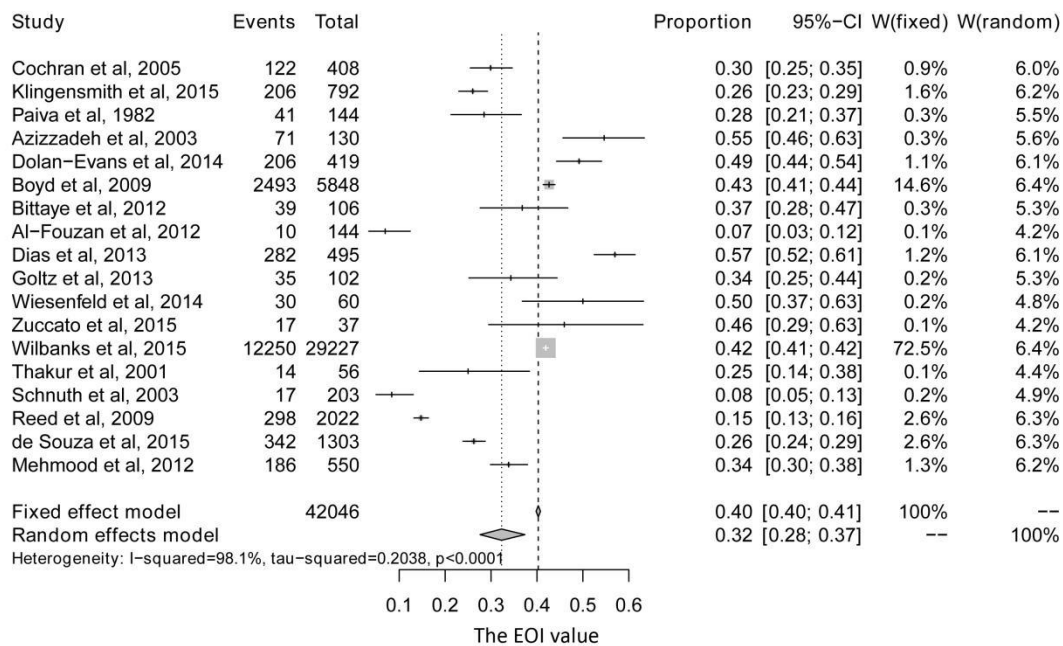

review only

Figure S11. Forest Plot of “Prestige”.

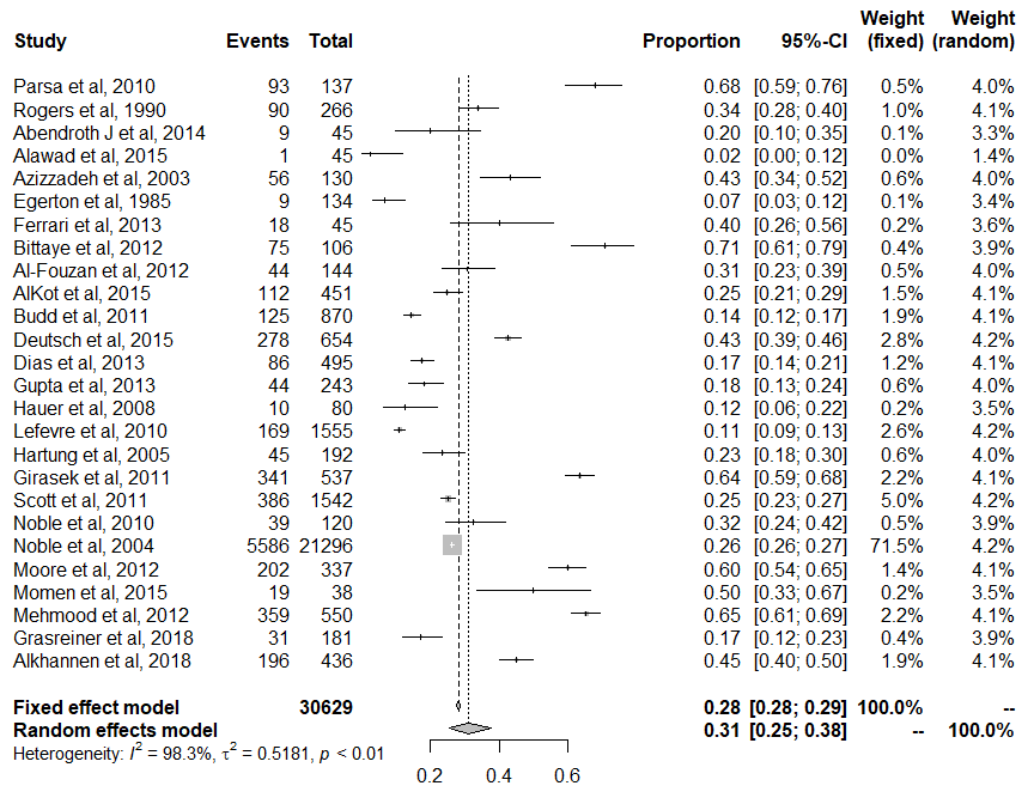

only

Figure S12. Forest Plot of “Advice from Others”.

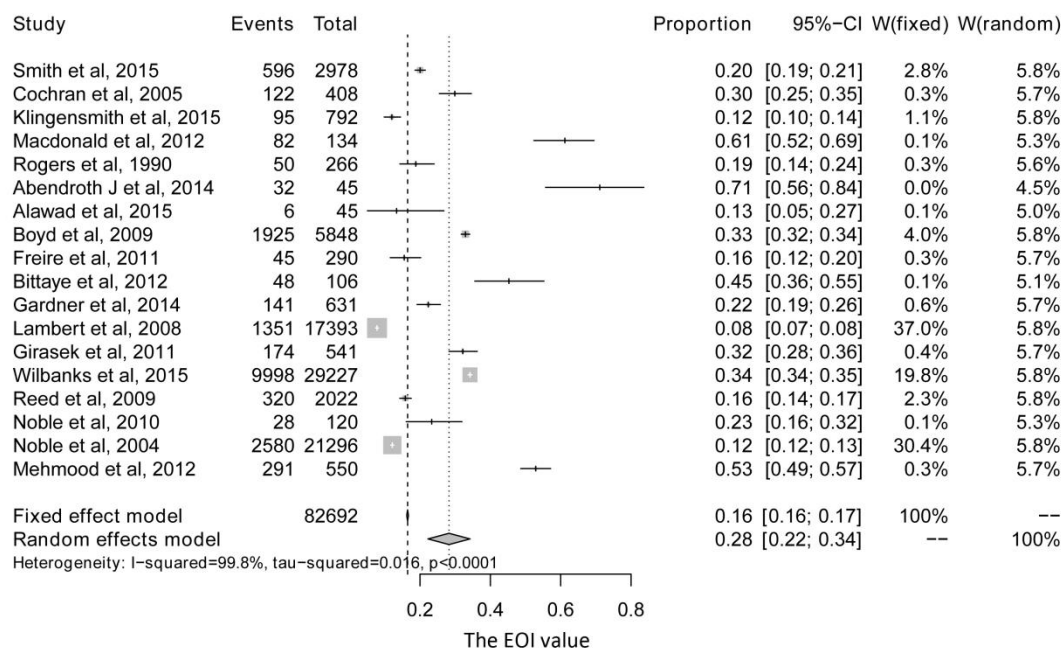

Figure S13. Forest Plot of “Student Debt”.

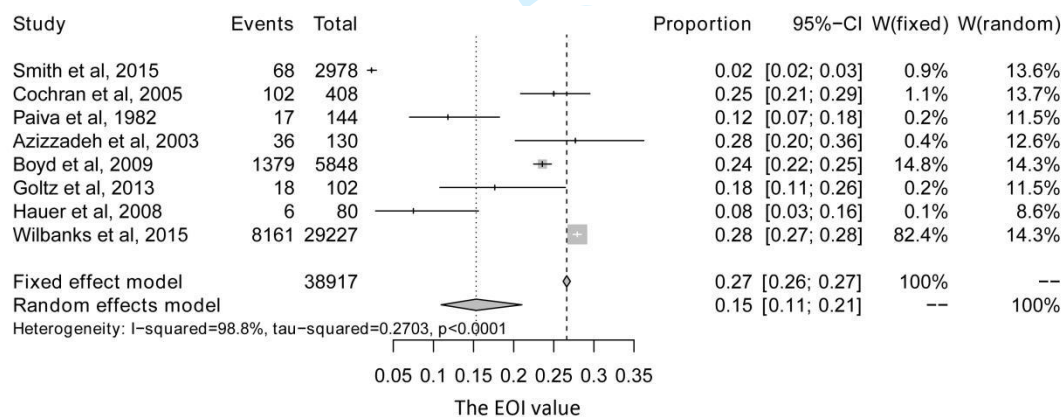

Figure S14. Funnel Plots of the Publication Bias Testing of the 12 Factors.

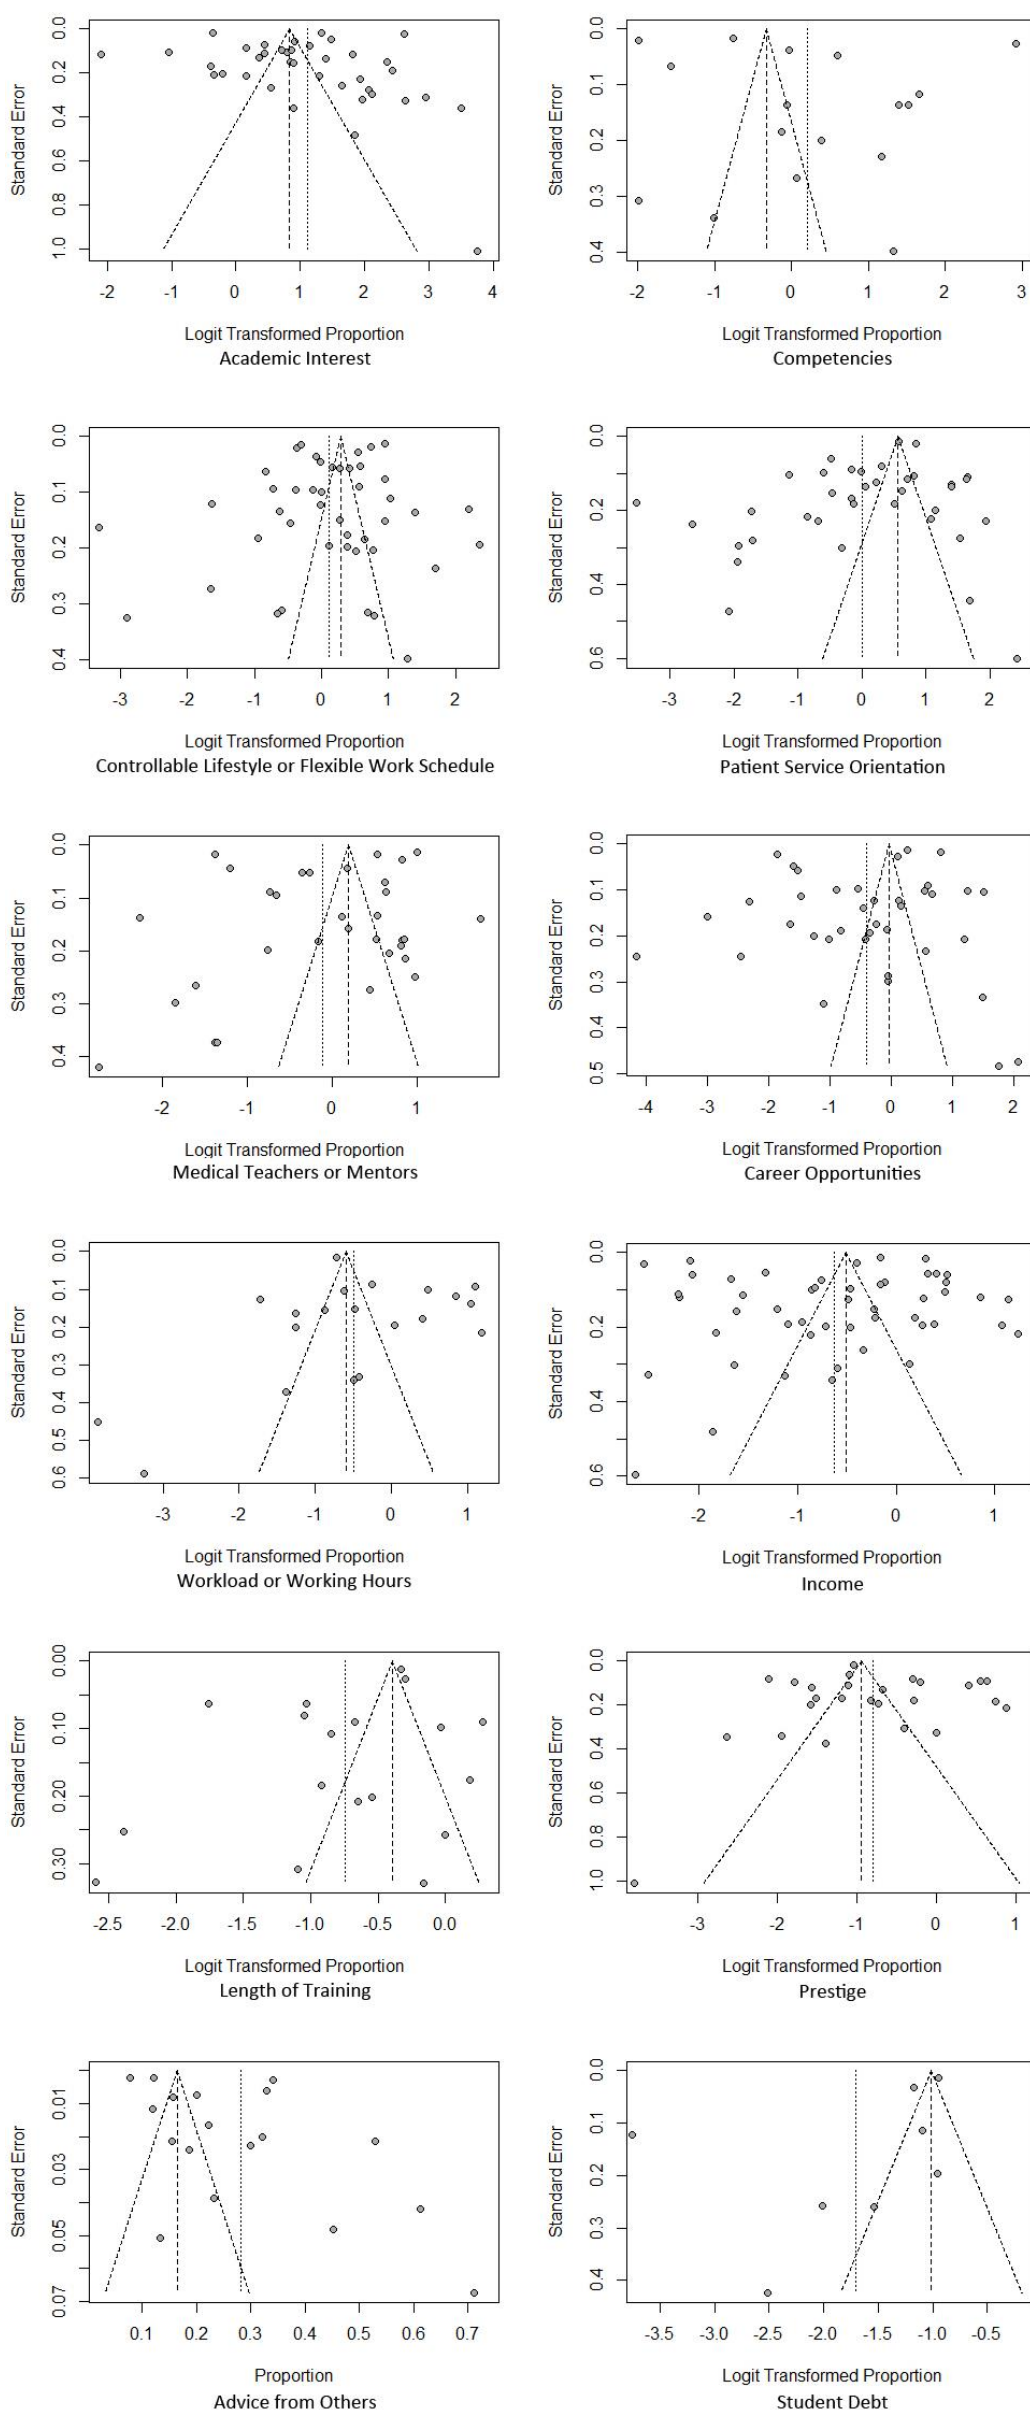

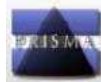

# PRISMA 2009 Checklist

| Section/topic                      | #  | Checklist item                                                                                                                                                                                                                                                                                              | Reported on page # |
|------------------------------------|----|-------------------------------------------------------------------------------------------------------------------------------------------------------------------------------------------------------------------------------------------------------------------------------------------------------------|--------------------|
| <b>TITLE</b>                       |    |                                                                                                                                                                                                                                                                                                             |                    |
| Title                              | 1  | Identify the report as a systematic review, meta-analysis, or both.                                                                                                                                                                                                                                         | 1                  |
| <b>ABSTRACT</b>                    |    |                                                                                                                                                                                                                                                                                                             |                    |
| Structured summary                 | 2  | Provide a structured summary including, as applicable: background; objectives; data sources; study eligibility criteria, participants, and interventions; study appraisal and synthesis methods; results; limitations; conclusions and implications of key findings; systematic review registration number. | 2-3                |
| <b>INTRODUCTION</b>                |    |                                                                                                                                                                                                                                                                                                             |                    |
| Rationale                          | 3  | Describe the rationale for the review in the context of what is already known.                                                                                                                                                                                                                              | 4                  |
| Objectives                         | 4  | Provide an explicit statement of questions being addressed with reference to participants, interventions, comparisons, outcomes, and study design (PICOS).                                                                                                                                                  | 5                  |
| <b>METHODS</b>                     |    |                                                                                                                                                                                                                                                                                                             |                    |
| Protocol and registration          | 5  | Indicate if a review protocol exists, if and where it can be accessed (e.g., Web address), and, if available, provide registration information including registration number.                                                                                                                               | 3                  |
| Eligibility criteria               | 6  | Specify study characteristics (e.g., PICOS, length of follow-up) and report characteristics (e.g., years considered, language, publication status) used as criteria for eligibility, giving rationale.                                                                                                      | 5                  |
| Information sources                | 7  | Describe all information sources (e.g., databases with dates of coverage, contact with study authors to identify additional studies) in the search and date last searched.                                                                                                                                  | 5                  |
| Search                             | 8  | Present full electronic search strategy for at least one database, including any limits used, such that it could be repeated.                                                                                                                                                                               | 5                  |
| Study selection                    | 9  | State the process for selecting studies (i.e., screening, eligibility, included in systematic review, and, if applicable, included in the meta-analysis).                                                                                                                                                   | 5-6                |
| Data collection process            | 10 | Describe method of data extraction from reports (e.g., piloted forms, independently, in duplicate) and any processes for obtaining and confirming data from investigators.                                                                                                                                  | 6                  |
| Data items                         | 11 | List and define all variables for which data were sought (e.g., PICOS, funding sources) and any assumptions and simplifications made.                                                                                                                                                                       | 6                  |
| Risk of bias in individual studies | 12 | Describe methods used for assessing risk of bias of individual studies (including specification of whether this was done at the study or outcome level), and how this information is to be used in any data synthesis.                                                                                      | 6-7                |
| Summary measures                   | 13 | State the principal summary measures (e.g., risk ratio, difference in means).                                                                                                                                                                                                                               | 6-7                |
| Synthesis of results               | 14 | Describe the methods of handling data and combining results of studies, if done, including measures of consistency (e.g., $I^2$ ) for each meta-analysis.                                                                                                                                                   | 7                  |

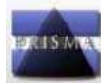

# PRISMA 2009 Checklist

Page 1 of 2

| Section/topic                 | #  | Checklist item                                                                                                                                                                                           | Reported on page # |
|-------------------------------|----|----------------------------------------------------------------------------------------------------------------------------------------------------------------------------------------------------------|--------------------|
| Risk of bias across studies   | 15 | Specify any assessment of risk of bias that may affect the cumulative evidence (e.g., publication bias, selective reporting within studies).                                                             | 7                  |
| Additional analyses           | 16 | Describe methods of additional analyses (e.g., sensitivity or subgroup analyses, meta-regression), if done, indicating which were pre-specified.                                                         | 7                  |
| <b>RESULTS</b>                |    |                                                                                                                                                                                                          |                    |
| Study selection               | 17 | Give numbers of studies screened, assessed for eligibility, and included in the review, with reasons for exclusions at each stage, ideally with a flow diagram.                                          | 5, 7               |
| Study characteristics         | 18 | For each study, present characteristics for which data were extracted (e.g., study size, PICOS, follow-up period) and provide the citations.                                                             | 7-8                |
| Risk of bias within studies   | 19 | Present data on risk of bias of each study and, if available, any outcome level assessment (see item 12).                                                                                                | 8                  |
| Results of individual studies | 20 | For all outcomes considered (benefits or harms), present, for each study: (a) simple summary data for each intervention group (b) effect estimates and confidence intervals, ideally with a forest plot. | 8                  |
| Synthesis of results          | 21 | Present results of each meta-analysis done, including confidence intervals and measures of consistency.                                                                                                  | 8-9                |
| Risk of bias across studies   | 22 | Present results of any assessment of risk of bias across studies (see Item 15).                                                                                                                          | 8-9                |
| Additional analysis           | 23 | Give results of additional analyses, if done (e.g., sensitivity or subgroup analyses, meta-regression [see Item 16]).                                                                                    | 8-9                |
| <b>DISCUSSION</b>             |    |                                                                                                                                                                                                          |                    |
| Summary of evidence           | 24 | Summarize the main findings including the strength of evidence for each main outcome; consider their relevance to key groups (e.g., healthcare providers, users, and policy makers).                     | 9-13               |
| Limitations                   | 25 | Discuss limitations at study and outcome level (e.g., risk of bias), and at review-level (e.g., incomplete retrieval of identified research, reporting bias).                                            | 13                 |
| Conclusions                   | 26 | Provide a general interpretation of the results in the context of other evidence, and implications for future research.                                                                                  | 14                 |
| <b>FUNDING</b>                |    |                                                                                                                                                                                                          |                    |
| Funding                       | 27 | Describe sources of funding for the systematic review and other support (e.g., supply of data); role of funders for the systematic review.                                                               | 15                 |

From: Moher D, Liberati A, Tetzlaff J, Altman DG, The PRISMA Group (2009). Preferred Reporting Items for Systematic Reviews and Meta-Analyses: The PRISMA Statement. PLoS Med 6(6): e1000097. doi:10.1371/journal.pmed1000097

For more information, visit: [www.prisma-statement.org](http://www.prisma-statement.org).

Page 2 of 2

For peer review only - <http://bmjopen.bmj.com/site/about/guidelines.xhtml>



## MOOSE Checklist for Meta-analyses of Observational Studies

| Item No                                     | Recommendation                                                                                                                                                                                                                                                               | Reported on Page No |
|---------------------------------------------|------------------------------------------------------------------------------------------------------------------------------------------------------------------------------------------------------------------------------------------------------------------------------|---------------------|
| Reporting of background should include      |                                                                                                                                                                                                                                                                              |                     |
| 1                                           | Problem definition                                                                                                                                                                                                                                                           | 5                   |
| 2                                           | Hypothesis statement                                                                                                                                                                                                                                                         | 5                   |
| 3                                           | Description of study outcome(s)                                                                                                                                                                                                                                              | 5                   |
| 4                                           | Type of exposure or intervention used                                                                                                                                                                                                                                        | 5                   |
| 5                                           | Type of study designs used                                                                                                                                                                                                                                                   | 5                   |
| 6                                           | Study population                                                                                                                                                                                                                                                             | 5                   |
| Reporting of search strategy should include |                                                                                                                                                                                                                                                                              |                     |
| 7                                           | Qualifications of searchers (eg, librarians and investigators)                                                                                                                                                                                                               | 6                   |
| 8                                           | Search strategy, including time period included in the synthesis and key words                                                                                                                                                                                               | 5                   |
| 9                                           | Effort to include all available studies, including contact with authors                                                                                                                                                                                                      | 5                   |
| 10                                          | Databases and registries searched                                                                                                                                                                                                                                            | 5                   |
| 11                                          | Search software used, name and version, including special features used (eg, explosion)                                                                                                                                                                                      | 6                   |
| 12                                          | Use of hand searching (eg, reference lists of obtained articles)                                                                                                                                                                                                             | 5                   |
| 13                                          | List of citations located and those excluded, including justification                                                                                                                                                                                                        | 5-6                 |
| 14                                          | Method of addressing articles published in languages other than English                                                                                                                                                                                                      | 5                   |
| 15                                          | Method of handling abstracts and unpublished studies                                                                                                                                                                                                                         | 5                   |
| 16                                          | Description of any contact with authors                                                                                                                                                                                                                                      | 5                   |
| Reporting of methods should include         |                                                                                                                                                                                                                                                                              |                     |
| 17                                          | Description of relevance or appropriateness of studies assembled for assessing the hypothesis to be tested                                                                                                                                                                   | 6                   |
| 18                                          | Rationale for the selection and coding of data (eg, sound clinical principles or convenience)                                                                                                                                                                                | 6-7                 |
| 19                                          | Documentation of how data were classified and coded (eg, multiple raters, blinding and interrater reliability)                                                                                                                                                               | 6-7                 |
| 20                                          | Assessment of confounding (eg, comparability of cases and controls in studies where appropriate)                                                                                                                                                                             | 6                   |
| 21                                          | Assessment of study quality, including blinding of quality assessors, stratification or regression on possible predictors of study results                                                                                                                                   | 6                   |
| 22                                          | Assessment of heterogeneity                                                                                                                                                                                                                                                  | 6                   |
| 23                                          | Description of statistical methods (eg, complete description of fixed or random effects models, justification of whether the chosen models account for predictors of study results, dose-response models, or cumulative meta-analysis) in sufficient detail to be replicated | 6-7                 |
| 24                                          | Provision of appropriate tables and graphics                                                                                                                                                                                                                                 | 5-7                 |
| Reporting of results should include         |                                                                                                                                                                                                                                                                              |                     |
| 25                                          | Graphic summarizing individual study estimates and overall estimate                                                                                                                                                                                                          | 8                   |
| 26                                          | Table giving descriptive information for each study included                                                                                                                                                                                                                 | 7                   |
| 27                                          | Results of sensitivity testing (eg, subgroup analysis)                                                                                                                                                                                                                       | 8                   |
| 28                                          | Indication of statistical uncertainty of findings                                                                                                                                                                                                                            | 7-9                 |

| Item No                                 | Recommendation                                                                                                            | Reported on Page No |
|-----------------------------------------|---------------------------------------------------------------------------------------------------------------------------|---------------------|
| Reporting of discussion should include  |                                                                                                                           |                     |
| 29                                      | Quantitative assessment of bias (eg, publication bias)                                                                    | 13                  |
| 30                                      | Justification for exclusion (eg, exclusion of non-English language citations)                                             | 13-14               |
| 31                                      | Assessment of quality of included studies                                                                                 | 13-14               |
| Reporting of conclusions should include |                                                                                                                           |                     |
| 32                                      | Consideration of alternative explanations for observed results                                                            | 14                  |
| 33                                      | Generalization of the conclusions (ie, appropriate for the data presented and within the domain of the literature review) | 14                  |
| 34                                      | Guidelines for future research                                                                                            | 14                  |
| 35                                      | Disclosure of funding source                                                                                              | 15                  |

From: Stroup DF, Berlin JA, Morton SC, et al, for the Meta-analysis Of Observational Studies in Epidemiology (MOOSE) Group. Meta-analysis of Observational Studies in Epidemiology. A Proposal for Reporting. *JAMA*. 2000;283(15):2008-2012. doi: 10.1001/jama.283.15.2008.

Transcribed from the original paper within the NEUROSURGERY® Editorial Office, Atlanta, GA, United States. August 2012.
